# Supplementary material for: Unraveling the influences of sequence and position on yeast uORF activity using massively parallel reporter systems and machine learning
Source: eLife journal article supplement (doi:10.7554/elife.69611), 2023-05-25

Figure 4-figure supplement 1.

**A. Start codon - Kozak Library**

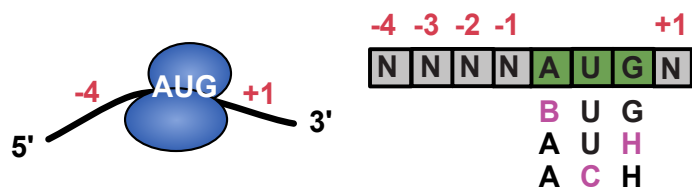

**B. Library preparation**

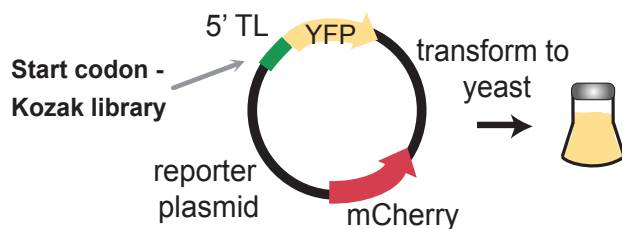

**C. FACS Sorting & DNA Seq**

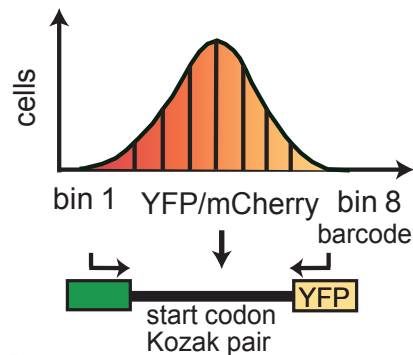

**D.**

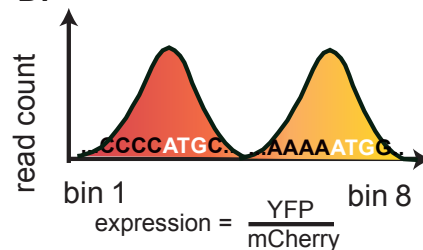

**E.**

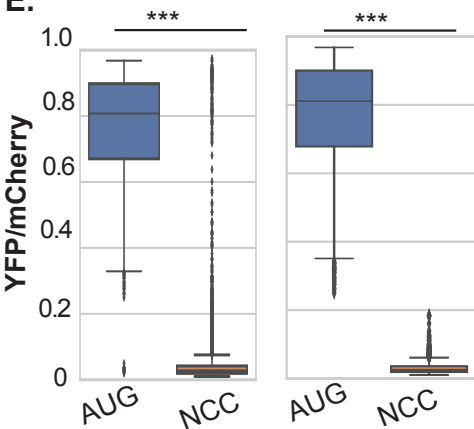

**F.**

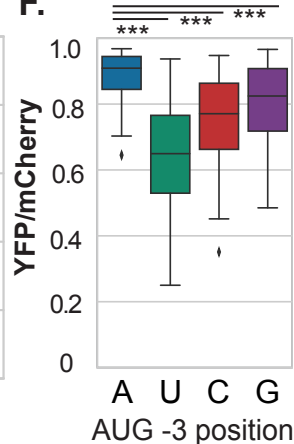

**G. NCC start codons**

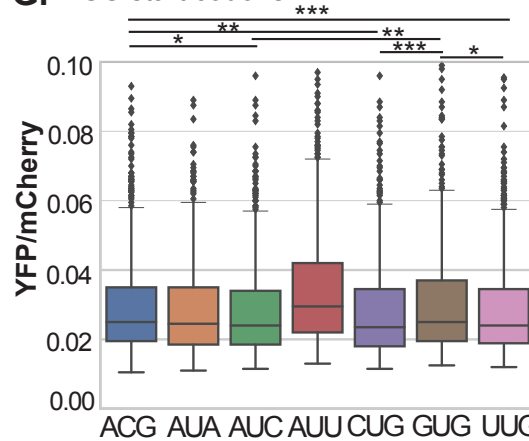

Supplement: supp [file elife-69611-supp-v1.zip]
