# Supplementary material for: Unraveling the influences of sequence and position on yeast uORF activity using massively parallel reporter systems and machine learning
Source: eLife. 2023 May 25;12:e69611. doi: 10.7554/eLife.69611 (PMC10259493; doi:10.7554/eLife.69611)
Supplement: Supplementary file 1. — This file contains data tables that have (a) expression differences between 2,033 wildtype uORF transcript leader reporters and corresponding AAG start codon mutations in the longest 5' UTR assayed for each uORF, (b) a list of uORFs and host UTRs that whose mutation decreases expression but are likely false-positives, (c) Expression differences between 417 wildtype uORF transcript leader reporters and corresponding CGACGA insert mutations, (d) expression differences between 2,209 wildtype uORF transcript leader reporters and corresponding AAG start codon mutations using PoLib-seq (minimum 5000 reads), (e) expression differences between 1,360 wildtype uORF transcript leader reporters and corresponding AAG start codon mutations in the longest 5' UTR assayed for each uORF, (f) expression levels (YFP / mCherry) for 8,096 Kozak variants of AUG and NCC start codons, (g) uORF activities in alternative transcript leaders, (h) Activities of homologous uORFs from S. cerevisiae and S. paradoxus, (i) expression differences between 285 wildtype uORF transcript leader reporters and corresponding AUG start codon mutations, (j) features used for elastic net regression modeling of uORF activities in the wildtype strain, and (k) features used for elastic net regression modeling of uORF activities in the UPF1 deletion strain. [file elife-69611-supp1.xlsx]

## Sheet: Summary
This file contains FACS-uORF Results tables from uORFs in the longest designed UTR for wildtype BY4741, and UPF1-deletion yeast strains.
File section	Sheet	Description
a	WT-Start->AAG	Expression differences between 2,033 wildtype uORF transcript leader reporters and corresponding AAG start codon mutations in the longest 5' UTR assayed for each uORF.
b	False Positive Enhancer uORFs	List of uORFs and host UTRs that whose mutation decreases expression but are likely false-positives.
c	WT-CGACGA-insert	Expression differences between 417 wildtype uORF transcript leader reporters and corresponding CGACGA insert mutations.
d	PoLib-seq WT-Start->AAG	Expression differences between 2,209 wildtype uORF transcript leader reporters and corresponding AAG start codon mutations, using PoLib-seq (minimum 5000 reads)
e	UPF1-Start->AAG	Expression differences between 1,360 wildtype uORF transcript leader reporters and corresponding AAG start codon mutationsi n the longest 5' UTR assayed for each uORF. .
f	Kozak Scores	Expression levels (YFP / mCherry) for 8,096 Kozak variants of AUG and NCC start codons
g	uORFs in aTSS UTRs	uORF activities in alternative transcript leaders.
h	Homologous uORF activities	Activities of homologous uORFs from S. cerevisiae and S. paradoxus.
i	WT-NCC->AUG	Expression differences between 285 wildtype uORF transcript leader reporters and corresponding AUG start codon mutations.
j	WT-ENR-Features	Table of features used for elastic net regression modeling of uORF activities in the wildtype strain
k	UPF1-ENR-Features	Table of features used for elastic net regression modeling of uORF activities in the UPF1 deletion strain
Field	Description
uORF	Chromosome, start, stop coordinates for uORFs. uORFs on the Negative strand have start > stop. oORFs have no stop coordinate listed, as they stop inside the main CDS
UTR	Chromosome, start, stop coordinates of the transcript leader in which the uORF is located
Type	uORF (terminates in the 5' transcript leader), oORF (overlaps the CDS and terminates within the CDS).
Species	Scer = Saccharomyces cerevisiae; Spar = Saccharomyces paradoxus
Spealman_2018	Notes whether the uORF was supported by ribosome profiling data in Spealman, Naik, et al., 2018
Start_Cons	PhastCons scores (0-1 from UCSC) for Saccharomyces cerevisiae uORF start codons
uORF_Cons	PhastCons scores (0-1 from UCSC) for Saccharomyces cerevisiae uORF coding region
Stop_Cons	PhastCons scores (0-1 from UCSC) for Saccharomyces cerevisiae uORF stop codons
Length	uORF length in nucleotides
Cap_Dist(nt)	Distance from the 5' cap to the uORF start codon
CDS_Dist(nt)	Distance from the uORF stop codon to the main ORF CDS
Kozak	uORF Kozak consensus sequence
StartCodon	uORF Start codon sequence
uORF_CDS	uORF coding sequence
uORF_CAI	uORF codon adaptation index
uORF_Pep	uORF encoded peptide sequence
StopCodon	uORF Stop codon
StopDown	10 nucleotides following uORF stop codon
MutName	Library designed mutant transcript leader ID
RefName	Library designed reference transcript leader ID
MutRaw1	Replicate 1 Raw FACS-uORF read counts from mutant. B1;B2;B3;B4;B5;B6;B7;B8;D;R, where B = Bin #; D = DNA; R = RNA
RefRaw1	Replicate 1 Raw FACS-uORF read counts from wildtype reference. B1;B2;B3;B4;B5;B6;B7;B8;D;R, where B = Bin #; D = DNA; R = RNA
MutNorm1	Replicate 1 Normalized FACS-uORF read counts from mutant. B1;B2;B3;B4;B5;B6;B7;B8;D;R, where B = Bin #; D = DNA; R = RNA
RefNorm1	Replicate 1 Normalized FACS-uORF read counts from wildtype reference. B1;B2;B3;B4;B5;B6;B7;B8;D;R, where B = Bin #; D = DNA; R = RNA
MutDNArpm1	Replicate 1 Reads per Million representation of mutant transcript leader construct in the DNA plasmid library
RefDNArpm1	Replicate 1 Reads per Million representation of wildtype reference transcript leader construct in the DNA plasmid library
MutRNArpm1	Replicate 1 Reads per Million representation of mutant transcript leader construct in the RNA library
RefRNArpm1	Replicate 1 Reads per Million representation of wildtype reference transcript leader construct in the RNA library
MutRNA1	Replicate 1 Mutant RNA RPM divided by Mutant DNA RPM (the RNA expression level)
RefRNA1	Replicate 1 wildtype reference RNA RPM divided by Mutant DNA RPM (the RNA expression level)
MutYFP1	Replicate 1 Mutant YFP level from FACS-uORF
RefYFP1	Replicate 1 wildtype reference YFP level from FACS-uORF
Log2diff1	Replicate 1 Log2 ratio of the Mutant YFP to Reference YFP levels
RawP1	Replicate 1 Wilcoxon Rank-sum test p-value comparing median YFP levels from mutant and wildtype reference transcript leaders
AdjP1	Replicate 1 Wilcoxon Rank-sum test Benhamini Hochberg correction of the raw pvalue
MutRaw2	Replicate 2 Raw FACS-uORF read counts from mutant. B1;B2;B3;B4;B5;B6;B7;B8;D;R, where B = Bin #; D = DNA; R = RNA
RefRaw2	Replicate 2 Raw FACS-uORF read counts from wildtype reference. B1;B2;B3;B4;B5;B6;B7;B8;D;R, where B = Bin #; D = DNA; R = RNA
MutNorm2	Replicate 2 Normalized FACS-uORF read counts from mutant. B1;B2;B3;B4;B5;B6;B7;B8;D;R, where B = Bin #; D = DNA; R = RNA
RefNorm2	Replicate 2 Normalized FACS-uORF read counts from wildtype reference. B1;B2;B3;B4;B5;B6;B7;B8;D;R, where B = Bin #; D = DNA; R = RNA
MutDNArpm2	Replicate 2 Reads per Million representation of mutant transcript leader construct in the DNA plasmid library
RefDNArpm2	Replicate 2 Reads per Million representation of wildtype reference transcript leader construct in the DNA plasmid library
MutRNArpm2	Replicate 2 Reads per Million representation of mutant transcript leader construct in the RNA library
RefRNArpm2	Replicate 2 Reads per Million representation of wildtype reference transcript leader construct in the RNA library
MutRNA2	Replicate 2 Mutant RNA RPM divided by Mutant DNA RPM (the RNA expression level)
RefRNA2	Replicate 2 wildtype reference RNA RPM divided by Mutant DNA RPM (the RNA expression level)
MutYFP2	Replicate 2 Mutant YFP level from FACS-uORF
RefYFP2	Replicate 2 wildtype reference YFP level from FACS-uORF
Log2diff2	Replicate 2 Log2 ratio of the Mutant YFP to Reference YFP levels
RawP2	Replicate 2 Wilcoxon Rank-sum test p-value comparing median YFP levels from mutant and wildtype reference transcript leaders
AdjP2	Replicate 2 Wilcoxon Rank-sum test Benhamini Hochberg correction of the raw pvalue
MutRaw3	Replicate 3 Raw FACS-uORF read counts from mutant. B1;B2;B3;B4;B5;B6;B7;B8;D;R, where B = Bin #; D = DNA; R = RNA
RefRaw3	Replicate 3 Raw FACS-uORF read counts from wildtype reference. B1;B2;B3;B4;B5;B6;B7;B8;D;R, where B = Bin #; D = DNA; R = RNA
MutNorm3	Replicate 3 Normalized FACS-uORF read counts from mutant. B1;B2;B3;B4;B5;B6;B7;B8;D;R, where B = Bin #; D = DNA; R = RNA
RefNorm3	Replicate 3 Normalized FACS-uORF read counts from wildtype reference. B1;B2;B3;B4;B5;B6;B7;B8;D;R, where B = Bin #; D = DNA; R = RNA
MutDNArpm3	Replicate 3 Reads per Million representation of mutant transcript leader construct in the DNA plasmid library
RefDNArpm3	Replicate 3 Reads per Million representation of wildtype reference transcript leader construct in the DNA plasmid library
MutRNArpm3	Replicate 3 Reads per Million representation of mutant transcript leader construct in the RNA library
RefRNArpm3	Replicate 3 Reads per Million representation of wildtype reference transcript leader construct in the RNA library
MutRNA3	Replicate 3 Mutant RNA RPM divided by Mutant DNA RPM (the RNA expression level)
RefRNA3	Replicate 3 wildtype reference RNA RPM divided by Mutant DNA RPM (the RNA expression level)
MutYFP3	Replicate 3 Mutant YFP level from FACS-uORF
RefYFP3	Replicate 3 wildtype reference YFP level from FACS-uORF
Log2diff3	Replicate 3 Log2 ratio of the Mutant YFP to Reference YFP levels
RawP3	Replicate 3 Wilcoxon Rank-sum test p-value comparing median YFP levels from mutant and wildtype reference transcript leaders
AdjP3	Replicate 3 Wilcoxon Rank-sum test Benhamini Hochberg correction of the raw pvalue
ConsistDir	Notes whether the uORF regulation is consistent among all three replicates (all repressors or all enhancers)
Signif	Notes whetehr the uORF is significant (AdjP values all < 0.05)

## Sheet: a
uORF	UTR	Type	Species	Spealman_2018	Start_Cons	uORF_Cons	Stop_Cons	Length	Cap_Dist(nt)	CDS_Dist(nt)	Kozak	StartCodon	uORF_CDS	uORF_CAI	uORF_Pep	StopCodon	StopDown	MutName	RefName	MutRaw1	RefRaw1	MutNorm1	RefNorm1	MutDNArpm1	RefDNArpm1	MutRNArpm1	RefRNArpm1	MutRNA1	RefRNA1	MutYFP1	RefYFP1	Log2diff1	RawP1	AdjP1	MutRaw2	RefRaw2	MutNorm2	RefNorm2	MutDNArpm2	RefDNArpm2	MutRNArpm2	RefRNArpm2	MutRNA2	RefRNA2	MutYFP2	RefYFP2	Log2diff2	RawP2	AdjP2
chrI:114221-oORF	chrI;114161;114249	oORF	Scer	N	NA	NA	NA	NA	60	NA	CUGCGAUGC	AUG	NA	NA	NA	NA	NA	YAL019W-A|chrI;114161;114249|114221,AAG	YAL019W-A|chrI;114161;114249|WT	16329;19367;246;24;22;381;33;17;32;15025;1969	48690;1850;14;260;22;34;45;19;23;16871;2161	14046.589,17314.582,224.496,20.092,22.000,284.361,24.788,13.215,24.606	41884.281,1653.946,12.776.217.666,22.000,25.376,33.802,14.770,17.685	327.826	368.103	77.126	84.647	0.235	0.23	0.0555639	0.0150401	-1.88533	0	0	13989;20945;681;184;25;356;28;22;21;16861;2206	37333;2747;368;49;19;36;45;23;21;17287;1344	13910.888,16937.128,681.000,158.236,22.385,323.809,24.193,20.115,17.487	37124.540,2221.356,368.000.42.139,17.013,32.745,38.881,21.030,17.487	361.222	370.348	86.559	52.736	0.24	0.142	0.0574187	0.0165961	-1.79068	0	0
chrI:114243-oORF	Table	oORF	Scer	N	NA	NA	NA	NA	82	NA	AUUCAAUGG	AUG	NA	NA	NA	NA	NA	YAL019W-A|chrI;114161;114249|114243,AAG	YAL019W-A|chrI;114161;114249|WT	60924;5261;1189;236;32;51;55;32;36;31685;954	48690;1850;14;260;22;34;45;19;23;16871;2161	52408.255,4703.465,1085.063,197.574,32.000,38.064,41.313,24.876,27.681	41884.281,1653.946,12.776.217.666,22.000,25.376,33.802,14.770,17.685	691.326	368.103	37.368	84.647	0.054	0.23	0.0218236	0.0150401	-0.537072	3.18e-60	4.75e-60	67725;9989;775;111;45;56;55;22;55;32817;2359	37333;2747;368;49;19;36;45;23;21;17287;1344	67346.837,8077.583,775.000,95.458,40.294,50.936,47.521,20.115,45.799	37124.540,2221.356,368.000.42.139,17.013,32.745,38.881,21.030,17.487	703.055	370.348	92.562	52.736	0.132	0.142	0.0195701	0.0165961	-0.23781	3.12e-44	4.32e-44
chrI:114650-114644	chrI;114656;114615	uORF	Scer	N	0.0266667	0.022625	0.000333333	6	6	29	AUGGAAUGU	AUG	UGA	1	M	UGA	UCAUUAAAGG	YAL020C|chrI;114656;114615|114650,AAG	YAL020C|chrI;114656;114615|WT	1;726;308;1;0;1;0;0;0;383;0	140;216;0;0;0;0;3;1;0;350;0	0.860,649.062,281.076,0.837,0.000,0.746,0.000,0.000,0.000	120.431,193.109,0.000.0.000,0.000,0.000,2.253,0.777,0.000	8.357	7.637	0	0	0	0	0.128333	0.0601987	-1.09209	6.68e-49	9.61e-49	2;693;598;21;0;0;2;2;1;598;89	315;479;0;0;1;0;1;2;1;425;76	1.989,560.393,598.000,18.060,0.000,0.000,1.728,1.829,0.833	313.241,387.342,0.000.0.000,0.895,0.000,0.864,1.829,0.833	12.811	9.105	3.492	2.982	0.273	0.328	0.163983	0.0487304	-1.75065	2.71e-153	4.97e-153
chrI:114655-114637	chrI;114656;114615	uORF	Scer	N	0.07	0.0276	0.00166667	18	1	22	ND-too-cl	AUG	GAAUGUGAUCAUUAA	1	MECDH	UAA	AGGCUAUAAC	YAL020C|chrI;114656;114615|114655,AAG	YAL020C|chrI;114656;114615|WT	310;309;0;55;0;0;0;1;1;270;18	140;216;0;0;0;0;3;1;0;350;0	266.669,276.254,0.000,46.045,0.000,0.000,0.000,0.777,0.769	120.431,193.109,0.000.0.000,0.000,0.000,2.253,0.777,0.000	5.891	7.637	0.705	0	0.12	0	0.0735273	0.0601987	-0.288548	0.49296	0.507576	412;202;11;0;2;0;3;0;0;343;86	315;479;0;0;1;0;1;2;1;425;76	409.699,163.347,11.000,0.000,1.791,0.000,2.592,0.000,0.000	313.241,387.342,0.000.0.000,0.895,0.000,0.864,1.829,0.833	7.348	9.105	3.374	2.982	0.459	0.328	0.036285	0.0487304	0.425448	2.3e-13	2.71e-13
chrI:129038-oORF	chrI;129067;129019	oORF	Scer	Y	NA	NA	NA	NA	29	NA	AAUAGAUGC	AUG	NA	NA	NA	NA	NA	YAL014C|chrI;129067;129019|129038,129019,AAG	YAL014C|chrI;129067;129019|WT	0;1;0;0;0;22;228;1061;994;485;379	0;0;0;212;0;1;0;0;0;155;126	0.000,0.894,0.000,0.000,0.000,16.420,171.263,824.803,764.314	0.000,0.000,0.000.177.482,0.000,0.746,0.000,0.000,0.000	10.582	3.382	14.846	4.935	1.403	1.459	0.92929	0.39163	-1.24664	8.09e-108	1.36e-107	1;2;1;2;2;0;538;529;817;425;501	2;0;53;76;131;0;0;0;1;80;115	0.994,1.617,1.000,1.720,1.791,0.000,464.845,483.685,680.318	1.989,0.000,53.000.65.358,117.299,0.000,0.000,0.000,0.833	9.105	1.714	19.658	4.512	2.159	2.632	0.929898	0.43002	-1.11267	4.33e-135	7.68e-135
chrI:138401-138377	chrI;138453;138345	uORF	Scer	N	0.442333	0.671577	0.906333	24	52	32	AUCAGGUGA	GUG	ACCCAAACUAGAAUAAGAUAA	0.869071	MTQTRIR	UAA	ACAGUGGAGU	YAL007C|chrI;138453;138345|138401,138377,AAG	YAL007C|chrI;138453;138345|WT	26;13;10;82;3927;10394;17252;2870;479;7995;257	27;11;8;1974;8912;10363;366;513;28;10937;884	22.366,11.622,9.126,68.649,3927.000,7757.595,12958.906,2231.087,368.316	23.226,9.834,7.301.1652.587,8912.000,7734.458,274.922,398.797,21.530	174.441	238.631	10.067	34.626	0.058	0.145	0.761495	0.612886	-0.313217	0	0	19;354;150;1146;3461;9497;5447;1910;21;7548;850	28;106;81;1289;15108;5703;3663;18;18;10719;418	18.894,286.261,150.000,985.535,3099.034,8638.239,4706.335,1746.387,17.487	27.844,85.717,81.000.1108.512,13527.942,5187.310,3164.917,16.458,14.989	161.705	229.639	33.352	16.401	0.206	0.071	0.703779	0.612219	-0.201074	0	0
chrI:141469-141439	chrI;141493;141431	uORF	Scer	N	0.992667	0.746812	0.259667	30	24	8	CAAGUAUUA	AUU	ACAAGAAACAAAAAUUCAAGUAAAUAA	0.878341	MTRNKNSSK	UAA	CAGATAATAT	YAL005C|chrI;141493;141431|141469,141439,AAG	YAL005C|chrI;141493;141431|WT	1;2;0;0;0;0;2;137;1395;497;561	1;0;0;0;1;1;1;1;693;355;211	0.860,1.788,0.000,0.000,0.000,0.000,1.502,106.501,1072.654	0.860,0.000,0.000.0.000,1.000,0.746,0.751,0.777,532.867	10.844	7.746	21.975	8.265	2.026	1.067	0.98737	0.99544	0.0117436	0.0059332	0.00640954	0;1;0;1;0;1;1;212;1846;353;729	1;2;0;1;0;0;0;152;860;224;386	0.000,0.809,0.000,0.860,0.000,0.910,0.864,193.840,1537.170	0.994,1.617,0.000.0.860,0.000,0.000,0.000,138.979,716.124	7.562	4.799	28.604	15.146	3.783	3.156	0.990866	0.984422	-0.0094122	0.029616	0.0311429
chrI:158931-oORF	chrI;158863;158965	oORF	Scer	N	NA	NA	NA	NA	68	NA	CAUAUAUGC	AUG	NA	NA	NA	NA	NA	YAR008W|chrI;158863;158965|158931,AAG	YAR008W|chrI;158863;158965|WT	340;11667;5634;151;16;24;31;23;17;11380;3211	2028;578;14616;24285;2951;25;47;22;35;19008;12704	292.476,10430.589,5141.500,126.414,16.000,17.912,23.286,17.880,13.072	1744.533,516.746,13338.333.20330.843,2951.000,18.659,35.304,17.102,26.912	248.297	414.73	125.776	497.619	0.507	1.2	0.135751	0.332717	1.29333	0	0	287;21029;9991;262;273;15;30;12;20;11299;3599	1117;27;13734;26248;5593;222;30;37;32;18653;10283	285.397,17005.055,9991.000,225.314,244.449,13.644,25.921,10.972,16.654	1110.763,21.833,13734.000.22572.707,5008.060,201.926,25.921,33.831,26.646	242.064	399.613	141.217	403.482	0.583	1.01	0.139283	0.347365	1.31843	0	0
chrI:168938-168914	chrI;169021;168871	uORF	Scer	N	0.993667	0.789115	0.165333	24	83	43	UGGACGUGU	GUG	UUCAAGUCGAGAAAGAGGUGA	0.665839	MFKSRKR	UGA	AAUACACGUA	YAR014C|chrI;169021;168871|168938,168914,AAG	YAR014C|chrI;169021;168871|WT	4;1834;2757;724;1;3;2;5;6;2114;236	5;0;3301;1;1;0;2;2;1;1441;934	3.441,1639.642,2515.995,606.116,1.000,2.239,1.502,3.887,4.614	4.301,0.000,3012.441.0.837,1.000,0.000,1.502,1.555,0.769	46.125	31.441	9.244	36.585	0.2	1.164	0.207724	0.246681	0.247983	4.75e-57	7e-57	6;971;2344;557;0;1;3;0;3;2019;463	2;633;1989;842;1;2;2;0;3;1272;368	5.966,785.197,2344.000,479.008,0.000,0.910,2.592,0.000,2.498	1.989,511.874,1989.000.724.102,0.895,1.819,1.728,0.000,2.498	43.254	27.251	18.167	14.439	0.42	0.53	0.221747	0.245051	0.144168	8.15e-19	9.97e-19
chrI:169336-169369	chrI;169285;169374	uORF	Scer	Y	0.743333	0.597394	0.0113333	33	51	5	AAGCAUUGC	UUG	CUUACAAAGAAUACACAUACGAAAUAUUAA	0.799321	MLTKNTHTKY	UAA	CGATAATGAG	YAR015W|chrI;169285;169374|169336,169369,AAG	YAR015W|chrI;169285;169374|WT	7;6;5;9;6;6;7;225;7576;2689;2099	2;3;3;1;3;1;1;858;8109;2226;1269	6.022,5.364,4.563,7.535,6.000,4.478,5.258,174.911,5825.398	1.720,2.682,2.738.0.837,3.000,0.746,0.751,666.994,6235.236	58.671	48.568	82.218	49.707	1.401	1.023	0.992388	0.98795	-0.00646621	1.27e-09	1.48e-09	4;10;4;5;6;8;12;1031;10002;3161;1991	5;3;3;2;4;89;4;670;5374;1259;1156	3.978,8.086,4.000,4.300,5.372,7.277,10.368,942.683,8328.694	4.972,2.426,3.000.1.720,3.582,80.952,3.456,612.607,4474.945	67.72	26.972	78.122	45.359	1.154	1.682	0.989979	0.984194	-0.00845465	0.00097482	0.00105003
chrI:183688-183703	chrI;183687;183769	uORF	Scer	N	0.000333333	0.0018	0.00266667	15	1	66	ND-too-cl	AUG	AUCAAGUCGUAA	0.622549	MIKS	UAA	UUCGAAUCAG	YAR027W|chrI;183687;183769|183688,AAG	YAR027W|chrI;183687;183769|WT	21;9;3;132;4898;8935;2078;703;5;5962;10190	5;4760;230;0;3;9;10;2;5;1678;1292	18.065,8.046,2.738,110.507,4898.000,6668.666,1560.898,546.500,3.845	4.301,4255.559,209.894.0.000,3.000,6.717,7.512,1.555,3.845	130.083	36.612	399.145	50.608	3.068	1.382	0.671252	0.08805	-2.93046	0	0	22;15;77;409;3461;7088;3182;595;13;5435;8313	263;6662;258;0;6;4;4;3;5;2556;678	21.877,12.130,77.000,351.731,3099.034,6447.072,2749.322,544.031,10.825	261.531,5387.212,258.000.0.000,5.372,3.638,3.456,2.743,4.164	116.437	54.758	326.184	26.603	2.801	0.486	0.693482	0.0785475	-3.14222	0	0
chrI:186738-186756	chrI;186696;186835	uORF	Scer	N	0.000333333	0.00116667	0.000333333	18	42	79	ACGGCAUGA	AUG	AUUAUGCUUAAUUGA	0.856419	MIMLN	UGA	UUCCUAUUUU	YAR031W|chrI;186696;186835|186738,AAG	YAR031W|chrI;186696;186835|WT	5263;2;2;2;1;2;1;2;4;2422;0	5615;1587;177;2;49;4;2;181;0;3275;0	4527.356,1.788,1.825,1.674,1.000,1.493,0.751,1.555,3.076	4830.155,1418.818,161.527.1.674,49.000,2.985,1.502,140.706,0.000	52.845	71.456	0	0	0	0	0.0107662	0.0524308	2.28391	4.45e-125	7.77e-125	4755;1597;0;2;85;3;2;3;1;2657;0	4763;1139;6;2;108;4;2;4;4;3259;0	4728.449,1291.411,0.000,1.720,76.110,2.729,1.728,2.743,0.833	4736.404,921.050,6.000.1.720,96.705,3.638,1.728,3.657,3.331	56.922	69.819	0	0	0	0	0.0295193	0.0296283	0.00532023	4.02e-05	4.4e-05
chrI:186744-186756	chrI;186696;186835	uORF	Scer	N	0.00233333	0.00133333	0.000333333	12	48	79	UGAUUAUGC	AUG	CUUAAUUGA	0.772344	MLN	UGA	UUCCUAUUUU	YAR031W|chrI;186696;186835|186744,AAG	YAR031W|chrI;186696;186835|WT	10575;148;4;8;4;5;8;5;8;4463;0	5615;1587;177;2;49;4;2;181;0;3275;0	9096.863,132.316,3.650,6.697,4.000,3.732,6.009,3.887,6.151	4830.155,1418.818,161.527.1.674,49.000,2.985,1.502,140.706,0.000	97.377	71.456	0	0	0	0	0.0121843	0.0524308	2.1054	5.22e-160	9.67e-160	9738;961;56;3;6;1;5;3;4;3112;0	4763;1139;6;2;108;4;2;4;4;3259;0	9683.625,777.111,56.000,2.580,5.372,0.910,4.320,2.743,3.331	4736.404,921.050,6.000.1.720,96.705,3.638,1.728,3.657,3.331	66.67	69.819	0	0	0	0	0.0153806	0.0296283	0.945866	6.87e-26	8.73e-26
chrI:21480-oORF	chrI;21462;21565	oORF	Scer	N	NA	NA	NA	NA	18	NA	UGUUAAUGA	AUG	NA	NA	NA	NA	NA	YAL064W|chrI;21462;21565|21480,AAG	YAL064W|chrI;21462;21565|WT	44735;2112;484;14;501;30;41;24;24;17255;388	41786;1892;21;55;432;39;37;24;20;19858;1282	38482.097,1888.181,441.691,11.720,501.000,22.391,30.797,18.657,18.454	35945.298,1691.495,19.164.46.045,432.000,29.108,27.793,18.657,15.379	376.482	433.276	15.198	50.216	0.04	0.116	0.0226475	0.0202179	-0.163721	0.0053304	0.0057623	37284;8468;271;7;169;30;48;22;29;19598;1576	35439;6121;376;16;23;416;30;29;21;23655;2337	37075.813,6847.630,271.000,6.020,151.325,27.287,41.473,20.115,24.148	35241.115,4949.733,376.000.13.760,20.595,378.383,25.921,26.516,17.487	419.858	506.773	61.839	91.699	0.147	0.181	0.0232438	0.0261245	0.168559	6.49e-09	7.38e-09
chrI:21493-21520	chrI;21462;21565	uORF	Scer	N	0.00566667	0.00851852	0.00466667	27	31	45	UAUCGAUGU	AUG	UGUAUACAAACGUACUUCAAAUAA	0.773659	MCIQTYFK	UAA	GCAAUGCGAA	YAL064W|chrI;21462;21565|21493,AAG	YAL064W|chrI;21462;21565|WT	28168;6477;14;17;18;23;39;23;27;19642;1107	41786;1892;21;55;432;39;37;24;20;19858;1282	24230.775,5790.600,12.776,14.232,18.000,17.166,29.295,17.880,20.761	35945.298,1691.495,19.164.46.045,432.000,29.108,27.793,18.657,15.379	428.563	433.276	43.361	50.216	0.101	0.116	0.0245818	0.0202179	-0.281959	2.32e-199	4.57e-199	30405;6237;175;55;15;18;33;16;20;19127;2066	35439;6121;376;16;23;416;30;29;21;23655;2337	30235.224,5043.536,175.000,47.299,13.431,16.372,28.513,14.629,16.654	35241.115,4949.733,376.000.13.760,20.595,378.383,25.921,26.516,17.487	409.767	506.773	81.065	91.699	0.198	0.181	0.0206609	0.0261245	0.338503	0.090464	0.0940946
chrI:21523-oORF	chrI;21462;21565	oORF	Scer	N	NA	NA	NA	NA	61	NA	AAGCAAUGC	AUG	NA	NA	NA	NA	NA	YAL064W|chrI;21462;21565|21523,AAG	YAL064W|chrI;21462;21565|WT	12257;16970;82;72;116;461;25;29;28;18051;909	41786;1892;21;55;432;39;37;24;20;19858;1282	10543.759,15171.604,74.832,60.277,116.000,344.069,18.779,22.544,21.530	35945.298,1691.495,19.164.46.045,432.000,29.108,27.793,18.657,15.379	393.849	433.276	35.606	50.216	0.09	0.116	0.0628191	0.0202179	-1.63557	0	0	15412;21905;94;24;16;20;41;21;26;20515;2150	35439;6121;376;16;23;416;30;29;21;23655;2337	15325.942,17713.430,94.000,20.639,14.327,18.192,35.425,19.201,21.650	35241.115,4949.733,376.000.13.760,20.595,378.383,25.921,26.516,17.487	439.503	506.773	84.361	91.699	0.192	0.181	0.0453899	0.0261245	-0.796968	0	0
chrI:22689-oORF	chrI;22819;22685	oORF	Scer	N	NA	NA	NA	NA	130	NA	ACUGUAUGU	AUG	NA	NA	NA	NA	NA	YAL063C-A|chrI;22819;22685|22689,AAG	YAL063C-A|chrI;22819;22685|WT	4128;3;3;1;2;3;4;3;0;1646;754	4832;1374;1;109;515;0;5;0;4;3407;1853	3551.002,2.682,2.738,0.837,2.000,2.239,3.005,2.332,0.000	4156.600,1228.390,0.913.91.252,515.000,0.000,3.756,0.000,3.076	35.914	74.336	29.534	72.582	0.822	0.976	0.0115446	0.0760679	2.72007	3.07e-134	5.45e-134	3144;1437;2;1;2;1;1;2;2;2294;119	3820;5;1;3;2;3;4;2;2;2613;892	3126.445,1162.027,2.000,0.860,1.791,0.910,0.864,1.829,1.665	3798.670,4.043,1.000.2.580,1.791,2.729,3.456,1.829,1.665	49.146	55.98	4.669	35	0.095	0.625	0.0268443	0.0111364	-1.26933	2.62e-95	4.25e-95
chrI:22704-oORF	chrI;22819;22685	oORF	Scer	N	NA	NA	NA	NA	115	NA	AUCUCAUGA	AUG	NA	NA	NA	NA	NA	YAL063C-A|chrI;22819;22685|22704,AAG	YAL063C-A|chrI;22819;22685|WT	185;619;6275;1537;2;3;5;4;2;4586;5030	4832;1374;1;109;515;0;5;0;4;3407;1853	159.141,553.401,5726.467,1286.741,2.000,2.239,3.756,3.110,1.538	4156.600,1228.390,0.913.91.252,515.000,0.000,3.756,0.000,3.076	100.061	74.336	197.026	72.582	1.969	0.976	0.253806	0.0760679	-1.73837	0	0	219;2204;5966;782;3;5;6;5;6;4647;4310	3820;5;1;3;2;3;4;2;2;2613;892	217.777,1782.260,5966.000,672.503,2.686,4.548,5.184,4.572,4.996	3798.670,4.043,1.000.2.580,1.791,2.729,3.456,1.829,1.665	99.555	55.98	169.115	35	1.699	0.625	0.210738	0.0111364	-4.24209	0	0
chrI:22745-22700	chrI;22819;22685	uORF	Scer	N	0.779333	0.168936	0.0726667	45	74	15	AGCUAAUGU	AUG	UUUCGAUCGAACUUUCCUUUGCUUUUUUUCUGGAUCUCAUGA	0.675548	MFRSNFPLLFFWIS	UGA	GGUCCCACUG	YAL063C-A|chrI;22819;22685|22745,AAG	YAL063C-A|chrI;22819;22685|WT	2936;3367;1;2;2;3;7;6;1;3762;103	4832;1374;1;109;515;0;5;0;4;3407;1853	2525.616,3010.182,0.913,1.674,2.000,2.239,5.258,4.664,0.769	4156.600,1228.390,0.913.91.252,515.000,0.000,3.756,0.000,3.076	82.082	74.336	4.035	72.582	0.049	0.976	0.0479138	0.0760679	0.666846	3.06e-65	4.66e-65	2788;3692;3;1;6;3;3;4;8;3120;719	3820;5;1;3;2;3;4;2;2;2613;892	2772.432,2985.528,3.000,0.860,5.372,2.729,2.592,3.657,6.662	3798.670,4.043,1.000.2.580,1.791,2.729,3.456,1.829,1.665	66.841	55.98	28.212	35	0.422	0.625	0.0441109	0.0111364	-1.98585	0	0
chrI:227707-227719	chrI;227635;227741	uORF	Scer	N	0.0363333	0.0255833	0.0146667	12	72	22	AUAAUAUGU	AUG	UGCAAUUAA	0.845833	MCN	UAA	UAACUCCACA	YAR073W|chrI;227635;227741|227707,AAG	YAR073W|chrI;227635;227741|WT	3;1;0;1;1;2;2;2;3021;187;529	5;2270;0;4;0;0;2;0;0;1268;0	2.581,0.894,0.000,0.837,1.000,1.493,1.502,1.555,2322.931	4.301,2029.437,0.000.3.349,0.000,0.000,1.502,0.000,0.000	4.08	27.666	20.721	0	5.079	0	0.997199	0.0774587	-3.68638	0	0	1;1;0;1;3;0;0;0;1288;376;200	3;3259;47;5;4;1;1;0;5;1096;224	0.994,0.809,0.000,0.860,2.686,0.000,0.000,0.000,1072.521	2.983,2635.383,47.000.4.300,3.582,0.910,0.864,0.000,4.164	8.055	23.48	7.848	8.789	0.974	0.374	0.996388	0.0778324	-3.67827	0	0
chrI:45830-45875	chrI;45768;45898	uORF	Scer	Y	0.0366667	0.255067	0.474333	45	62	23	UUUCAGUGU	GUG	UAUUAUAAUACAUUCAUUUCUGUUUCAUUACGAUUAUAUUGA	0.829242	MYYNTFISVSLRLY	UGA	CGUGAUAAAA	YAL053W|chrI;45768;45898|45830,45875,AAG	YAL053W|chrI;45768;45898|WT	7;6;2;4;7;193;4891;3026;1230;2908;887	0;2;43;4;3;318;2866;2056;4;1918;979	6.022,5.364,1.825,3.349,7.000,144.046,3673.893,2352.359,945.781	0.000,1.788,39.241.3.349,3.000,237.340,2152.807,1598.298,3.076	63.449	41.848	34.744	38.348	0.548	0.916	0.867915	0.84028	-0.0466836	1.88e-35	2.56e-35	6;5;3;7;6;1370;3372;3991;2177;2624;1521	1;7;3;0;0;817;1726;2922;628;1359;1388	5.966,4.043,3.000,6.020,5.372,1246.119,2913.487,3649.125,1812.794	0.994,5.661,3.000.0.000,0.000,743.123,1491.304,2671.697,522.937	56.215	29.115	59.681	54.462	1.062	1.871	0.884985	0.879498	-0.00897172	3.8e-05	4.16e-05
chrI:57903-57897	chrI;57936;57796	uORF	Scer	N	0.275	0.265625	0.281333	6	33	101	UAUAUAUGU	AUG	UAG	1	M	UAG	GGGAAAUAAA	YAL045C|chrI;57936;57796|57903,AAG	YAL045C|chrI;57936;57796|WT	617;935;0;1;0;0;2;1;1;268;0	1981;1020;134;0;2;1;2;4;2;2030;0	530.758,835.913,0.000,0.837,0.000,0.000,1.502,0.777,0.769	1704.103,911.905,122.286.0.000,2.000,0.746,1.502,3.110,1.538	5.847	44.292	0	0	0	0	0.0526264	0.0449935	-0.22607	1.13e-26	1.48e-26	424;1;0;0;1;0;0;0;0;487;0	2274;1981;3;2;0;0;1;4;2;1424;41	421.632,0.809,0.000,0.000,0.895,0.000,0.000,0.000,0.000	2261.302,1601.931,3.000.1.720,0.000,0.000,0.864,3.657,1.665	10.433	30.507	0	1.609	0	0.053	0.00935909	0.0362783	1.95466	5.41e-44	7.48e-44
chrI:73552-73522	chrI;73665;73518	uORF	Scer	N	0.00866667	0.0045	0.013	30	113	4	UUGCGAUGG	AUG	GGAGGGAUCAAAUUUAGCAAAUUUUGA	0.682179	MGGIKFSKF	UGA	CTCTATGAGA	YAL037C-A|chrI;73665;73518|73552,AAG	YAL037C-A|chrI;73665;73518|WT	2481;3;1;1;1;1;2;1;2;966;0	315;0;0;0;0;0;0;2;0;235;0	2134.214,2.682,0.913,0.837,1.000,0.746,1.502,0.777,1.538	270.970,0.000,0.000.0.000,0.000,0.000,0.000,1.555,0.000	21.077	5.127	0	0	0	0	0.0117887	0.0149314	0.34095	0.97206	0.973503	2596;260;0;0;1;0;0;0;1;944;1	950;392;0;0;0;0;1;0;0;96;0	2581.504,210.248,0.000,0.000,0.895,0.000,0.000,0.000,0.833	944.695,316.990,0.000.0.000,0.000,0.000,0.864,0.000,0.000	20.224	2.057	0.039	0	0.002	0	0.0132777	0.0245322	0.885672	3.19e-19	3.91e-19
chrI:73582-73522	chrI;73665;73518	uORF	Scer	N	0.004	0.00464516	0.013	60	83	4	UAAUCAUGA	AUG	AUAACCUUGAGGGAAGAUUAUCUUGCGAUGGGAGGGAUCAAAUUUAGCAAAUUUUGA	0.684708	MITLREDYLAMGGIKFSKF	UGA	CTCTATGAGA	YAL037C-A|chrI;73665;73518|73582,AAG	YAL037C-A|chrI;73665;73518|WT	467;281;0;1;0;0;0;0;0;673;0	315;0;0;0;0;0;0;2;0;235;0	401.724,251.221,0.000,0.837,0.000,0.000,0.000,0.000,0.000	270.970,0.000,0.000.0.000,0.000,0.000,0.000,1.555,0.000	14.684	5.127	0	0	0	0	0.0351404	0.0149314	-1.23478	1.6e-19	2.01e-19	716;217;0;0;2;0;1;0;0;452;0	950;392;0;0;0;0;1;0;0;96;0	712.002,175.477,0.000,0.000,1.791,0.000,0.864,0.000,0.000	944.695,316.990,0.000.0.000,0.000,0.000,0.864,0.000,0.000	9.683	2.057	0	0	0	0	0.0226084	0.0245322	0.117818	0.0459	0.048
chrI:92859-92886	chrI;92830;92899	uORF	Scer	N	0.000666667	0.0980741	0.260333	27	29	13	AAUUGAUGG	AUG	GCAGUUUUUUACGUAGUCCAGUAG	0.73172	MAVFYVVQ	UAG	UUGUCCAGGU	YAL028W|chrI;92830;92899|92859,92886,AAG	YAL028W|chrI;92830;92899|WT	32;15;41;7;7;398;8510;9646;4751;7014;134	1178;14731;781;316;262;41;19;21;15;9217;0	27.527,13.410,37.416,5.860,7.000,297.049,6392.319,7498.630,3653.176	1013.343,13169.882,712.728.264.548,262.000,30.600,14.272,16.325,11.534	153.036	201.103	5.249	0	0.034	0	0.88448	0.0966545	-3.19392	0	0	18;37;10;7;111;1410;4671;4183;4634;7597;213	1341;17897;1030;7;14;14;15;15;20;8634;0	17.899,29.920,10.000,6.020,99.391,1282.502,4035.853,3824.678,3858.745	1333.512,14472.370,1030.000.6.020,12.536,12.734,12.960,13.715,16.654	162.754	184.971	8.358	0	0.051	0	0.894125	0.0797963	-3.48608	0	0
chrI:94608-94617	chrI;94606;94686	uORF	Scer	N	0.0356667	0.0195556	0.00733333	9	2	69	ND-too-cl	AUG	AAAUAG	1	MK	UAG	AAAAGGACAG	YAL027W|chrI;94606;94686|94608,AAG	YAL027W|chrI;94606;94686|WT	24;17;69;12;477;3631;12316;4899;1888;7871;10269	16;5334;9208;495;42;8;9;3;6;5701;4508	20.645,15.198,62.968,10.046,477.000,2710.009,9251.211,3808.396,1451.736	13.764,4768.729,8403.077.414.403,42.000,5.971,6.760,2.332,4.614	171.735	124.388	402.239	176.579	2.342	1.42	0.827461	0.192629	-2.10287	0	0	22;23;33;109;756;4240;15537;2634;4559;6627;12002	9;3254;5868;237;9;6;125;8;10;6226;3576	21.877,18.599,33.000,93.738,676.934,3856.600,13424.330,2408.368,3796.292	8.950,2631.340,5868.000.203.815,8.059,5.457,108.003,7.315,8.327	141.974	133.383	470.932	140.314	3.317	1.052	0.84115	0.201068	-2.06468	0	0
chrII:100170-oORF	chrII;100182;100115	oORF	Scer	N	NA	NA	NA	NA	12	NA	CCUUAAUGU	AUG	NA	NA	NA	NA	NA	YBL066C|chrII;100182;100115|100170,AAG	YBL066C|chrII;100182;100115|WT	14;7;61;236;2848;9450;8914;523;462;4825;2829	232;4380;414;2;4;5;9;5;5;3297;58	12.043,6.258,55.668,197.574,2848.000,7053.038,6695.785,406.571,355.245	199.572,3915.829,377.810.1.674,4.000,3.732,6.760,3.887,3.845	105.275	71.936	110.813	2.272	1.053	0.032	0.734957	0.0913773	-3.00775	0	0	23;15;4;77;2444;9951;4855;728;231;5682;2671	624;5404;341;5;3;4;8;5;7;4175;62	22.872,12.130,4.000,66.218,2188.396,9051.187,4194.833,665.638,192.354	620.516,4369.933,341.000.4.300,2.686,3.638,6.912,4.572,5.829	121.728	89.443	104.804	2.433	0.861	0.027	0.729195	0.0785763	-3.21414	0	0
chrII:107881-oORF	chrII;107869;107931	oORF	Scer	Y	NA	NA	NA	NA	12	NA	ACUAGAUGG	AUG	NA	NA	NA	NA	NA	YBL060W|chrII;107869;107931|107881,107947,AAG	YBL060W|chrII;107869;107931|WT	15;11;445;6203;3599;332;84;9;7;4793;8476	1681;5547;2;311;4;227;20;11;3;4872;1111	12.903,9.834,406.100,5193.009,3599.000,247.789,63.097,6.996,5.382	1446.036,4959.157,1.825.260.362,4.000,169.422,15.023,8.551,2.307	104.577	106.301	332.007	43.518	3.175	0.409	0.455613	0.093245	-2.28871	0	0	2;11;622;5453;3422;324;337;8;4;4151;6675	1527;7065;106;17;4;8;12;3;8;5462;1511	1.989,8.895,622.000,4689.461,3064.113,294.702,291.176,7.315,3.331	1518.474,5713.097,106.000.14.620,3.582,7.277,10.368,2.743,6.662	88.929	117.015	261.912	59.288	2.945	0.507	0.45389	0.064736	-2.8097	0	0
chrII:107904-107916	chrII;107869;107931	uORF	Scer	N	0.001	0.00241667	0.00133333	12	35	15	AGUCAAUGG	AUG	GACUAUUAA	0.812359	MDY	UAA	GGGAUCGCAA	YBL060W|chrII;107869;107931|107904,AAG	YBL060W|chrII;107869;107931|WT	468;5873;166;5;9;12;0;6;8;4375;1552	1681;5547;2;311;4;227;20;11;3;4872;1111	402.585,5250.609,151.489,4.186,9.000,8.956,0.000,4.664,6.151	1446.036,4959.157,1.825.260.362,4.000,169.422,15.023,8.551,2.307	95.457	106.301	60.792	43.518	0.637	0.409	0.0798673	0.093245	0.223421	2.46e-23	3.14e-23	212;6111;323;5;28;7;5;2;10;3911;1663	1527;7065;106;17;4;8;12;3;8;5462;1511	210.816,4941.647,323.000,4.300,25.072,6.367,4.320,1.829,8.327	1518.474,5713.097,106.000.14.620,3.582,7.277,10.368,2.743,6.662	83.787	117.015	65.252	59.288	0.779	0.507	0.0846083	0.064736	-0.386229	1.25e-85	1.98e-85
chrII:113444-oORF	chrII;113447;113427	oORF	Scer	N	NA	NA	NA	NA	3	NA	ND-too-cl	AUG	NA	NA	NA	NA	NA	YBL057C|chrII;113447;113427|113444,AAG	YBL057C|chrII;113447;113427|WT	0;0;1;0;7;445;242;33;5;122;437	33;571;1;1;1;1;0;2;1;183;46	0.000,0.000,0.913,0.000,7.000,332.127,181.779,25.654,3.845	28.387,510.488,0.913.0.837,1.000,0.746,0.000,1.555,0.769	2.662	3.993	17.117	1.802	6.43	0.451	0.758107	0.0811116	-3.22442	2.53e-177	4.81e-177	0;0;0;0;53;171;234;71;0;133;512	15;526;5;0;0;1;2;0;0;224;188	0.000,0.000,0.000,0.000,47.457,155.537,202.181,64.918,0.000	14.916,425.349,5.000.0.000,0.000,0.910,1.728,0.000,0.000	2.849	4.799	20.09	7.377	7.052	1.537	0.778837	0.0763668	-3.3503	4.47e-150	8.15e-150
chrII:132112-132100	chrII;132196;132040	uORF	Scer	N	0.0923333	0.174786	0.411333	12	84	60	GAUUCGUGA	GUG	AAGCUCUAG	0.528425	MKL	UAG	AUCUAUCUUU	YBL047C|chrII;132196;132040|132112,132100,AAG	YBL047C|chrII;132196;132040|WT	3;6;4;0;3;891;2276;3007;1;1179;0	3;2;1;5;0;0;3698;1870;1;612;0	2.581,5.364,3.650,0.000,3.000,665.001,1709.626,2337.589,0.769	2.581,1.788,0.913.4.186,0.000,0.000,2777.767,1453.705,0.769	25.724	13.353	0	0	0	0	0.840948	0.849279	0.0142221	1.83e-06	2.08e-06	4;5;0;2;2;1508;2292;807;3;1045;91	2;2;0;1;3;18;738;172;1;757;14	3.978,4.043,0.000,1.720,1.791,1371.640,1980.341,737.871,2.498	1.989,1.617,0.000.0.860,2.686,16.372,637.649,157.266,0.833	22.388	16.218	3.571	0.549	0.16	0.034	0.809885	0.849921	0.0696111	2.36e-31	3.08e-31
chrII:142889-142871	chrII;142911;142868	uORF	Scer	N	0.624	0.75485	0.870667	18	22	3	GCAAGUUGA	UUG	AGGCAUAAUCAGUAA	0.728548	MRHNQ	UAA	GCAATGAGAT	YBL040C|chrII;142911;142868|142889,142871,AAG	YBL040C|chrII;142911;142868|WT	1;0;1;1;2;40;281;521;1694;994;2910	55;3;7;4;2;66;135;986;1511;1013;3390	0.860,0.000,0.913,0.837,2.000,29.854,211.074,405.016,1302.564	47.312,2.682,6.388.3.349,2.000,49.259,101.406,766.499,1161.850	21.688	22.102	113.985	132.787	5.256	6.008	0.952474	0.918161	-0.0529329	5.2e-09	6.04e-09	2;2;1;1;1;15;169;660;2123;1118;2576	1;4;1;2;2;77;590;1392;2175;901;1972	1.989,1.617,1.000,0.860,0.895,13.644,146.020,603.463,1767.828	0.994,3.235,1.000.1.720,1.791,70.037,509.774,1272.759,1811.129	23.951	19.303	101.076	77.377	4.22	4.009	0.969688	0.945308	-0.0367359	1.26e-48	1.78e-48
chrII:160143-160152	chrII;160093;160183	uORF	Scer	N	0.952333	0.863556	0.845333	9	50	31	AACUUAUCG	AUC	GGGUAA	0.517815	MG	UAA	CUUAGAGACA	YBL032W|chrII;160093;160183|160143,160152,AAG	YBL032W|chrII;160093;160183|WT	17;32;10;249;2359;14272;10592;4414;1257;12309;4244	30;19;7;19;771;9981;16733;1204;1992;11065;1634	14.624,28.609,9.126,208.457,2359.000,10651.953,7956.221,3431.366,966.542	25.807,16.986,6.388.15.906,771.000,7449.351,12569.057,935.968,1531.704	268.566	241.424	166.238	64.004	0.619	0.265	0.764633	0.794928	0.0560571	1.06e-132	1.88e-132	28;27;10;237;1719;15638;5913;1334;1080;12763;1710	30;27;53;93;2158;11810;12678;3496;1407;10231;1210	27.844,21.833,10.000,203.815,1539.220,14223.943,5108.970,1219.728,899.319	29.832,21.833,53.000.79.978,1932.307,10742.088,10954.088,3196.528,1171.613	273.428	219.184	67.097	47.478	0.245	0.217	0.74398	0.782259	0.0723835	0	0
chrII:164117-164018	chrII;164118;163997	uORF	Scer	Y	0.973	0.981465	0.955667	99	1	21	ND-too-cl	UUG	CAAUACAUCUACAAGUCAAAGGAGCCCCUCUAUAUUAUUUAUAUUUGUCGUUGUUCUUUUUUGUGUGCUCUUUUAUACUUCAGAAUCAUACAUUAA	0.753213	MQYIYKSKEPLYIIYICRCSFLCALLYFRIIH	UAA	CAUACAUAUA	YBL030C|chrII;164118;163997|164117,164018,AAG	YBL030C|chrII;164118;163997|WT	0;1;0;1;1;4;2;1924;1430;911;505	8;4;3;58;3;3;384;2385;8519;2215;819	0.000,0.894,0.000,0.837,1.000,2.985,1.502,1495.684,1099.567	6.882,3.576,2.738.48.556,3.000,2.239,288.443,1854.057,6550.497	19.877	48.328	19.781	32.08	0.995	0.664	0.935336	0.965909	0.0464027	7.87e-122	1.37e-121	1;1;1;1;0;2;2;1487;2272;848;890	3;5;0;6;4;5;8;882;4769;1466;1589	0.994,0.809,1.000,0.860,0.000,1.819,1.728,1359.621,1891.901	2.983,4.043,0.000.5.160,3.582,4.548,6.912,806.447,3971.160	18.167	31.407	34.922	62.349	1.922	1.985	0.968687	0.984744	0.0237182	3.2e-77	4.96e-77
chrII:182320-182359	chrII;182318;182400	uORF	Scer	N	0.967	0.708821	0.886	39	2	41	ND-too-cl	AUG	CGUAUUAGUAGCAGUAAAGGGCCACAGAUAGGGUGA	0.562234	MRISSSKGPQIG	UGA	UUUGAAGUUG	YBL020W|chrII;182318;182400|182320,AAG	YBL020W|chrII;182318;182400|WT	245;10;11;4;4;538;5233;7618;3620;3750;5353	3;2090;0;1;0;0;1;2;1;746;0	210.755,8.940,10.038,3.349,4.000,401.538,3930.788,5922.099,2783.519	2.581,1868.512,0.000.0.837,0.000,0.000,0.751,1.555,0.769	81.82	16.277	209.678	0	2.563	0	0.874613	0.0780907	-3.48542	0	0	6;8;3;7;10;256;3594;2878;2525;4234;4167	1;1545;49;1;2;3;1;4;1;1168;81	5.966,6.469,3.000,6.020,8.954,232.851,3105.300,2631.466,2102.575	0.994,1249.361,49.000.0.860,1.791,2.729,0.864,3.657,0.833	90.707	25.023	163.504	3.178	1.803	0.127	0.904608	0.0840436	-3.42808	0	0
chrII:186487-oORF	chrII;186515;186474	oORF	Scer	N	NA	NA	NA	NA	28	NA	GAUAAAUGG	AUG	NA	NA	NA	NA	NA	YBL018C|chrII;186515;186474|186487,AAG	YBL018C|chrII;186515;186474|WT	1;0;1;2;2;678;502;476;0;396;2011	27;255;498;55;0;0;0;1;2;547;612	0.860,0.000,0.913,1.674,2.000,506.027,377.079,370.034,0.000	23.226,227.976,454.467.46.045,0.000,0.000,0.000,0.777,1.538	8.64	11.935	78.771	23.972	9.117	2.009	0.797831	0.198979	-2.00347	0	0	1;1;0;0;134;828;651;321;68;579;1511	1;583;412;19;0;3;2;1;3;549;708	0.994,0.809,0.000,0.000,119.986,753.129,562.479,293.503,56.624	0.994,471.442,412.000.16.340,0.000,2.729,1.728,0.914,2.498	12.404	11.762	59.288	27.78	4.78	2.362	0.783249	0.160375	-2.28802	0	0
chrII:201759-201750	chrII;201768;201748	uORF	Scer	N	0.998333	0.997818	0.999667	9	9	2	GUUCUAUGG	AUG	GGCUGA	0.658002	MG	UGA	GCATGAGATC	YBL014C|chrII;201768;201748|201759,AAG	YBL014C|chrII;201768;201748|WT	0;1;0;0;37;78;149;1;0;106;2	0;162;20;0;1;0;0;0;0;86;0	0.000,0.894,0.000,0.000,37.000,58.216,111.922,0.777,0.000	0.000,144.832,18.252.0.000,1.000,0.000,0.000,0.000,0.000	2.313	1.876	0.078	0	0.034	0	0.743674	0.101389	-2.87478	1.68e-61	2.51e-61	2;0;1;0;66;104;97;2;0;107;87	0;81;11;24;0;0;0;0;0;66;56	1.989,0.000,1.000,0.000,59.097,94.596,83.810,1.829,0.000	0.000,65.500,11.000.20.639,0.000,0.000,0.000,0.000,0.000	2.292	1.414	3.414	2.197	1.49	1.554	0.706025	0.157287	-2.16632	6.84e-46	9.54e-46
chrII:207171-207189	chrII;207140;207193	uORF	Scer	Y	0.0743333	0.0317222	0.0123333	18	31	4	CAUACAUGC	AUG	CGCUAUUUGUAUUGA	0.658918	MRYLY	UGA	GAAAATGAGA	YBL009W|chrII;207140;207193|207171,207189,AAG	YBL009W|chrII;207140;207193|WT	4;5;1;9;3;183;303;1848;975;880;277	4;1;15;815;766;60;1;1;1;634;115	3.441,4.470,0.913,7.535,3.000,136.583,227.600,1436.603,749.705	3.441,0.894,13.689.682.299,766.000,44.781,0.751,0.777,0.769	19.2	13.833	10.85	4.505	0.565	0.326	0.901923	0.479274	-0.912153	0	0	4;2;3;1;0;609;2205;1126;1125;940;254	0;2;4;629;1124;99;18;57;0;471;192	3.978,1.617,3.000,0.860,0.000,553.932,1905.171,1029.545,936.791	0.000,1.617,4.000.540.926,1006.447,90.048,15.552,52.117,0.000	20.138	10.09	9.966	7.534	0.495	0.747	0.876457	0.516521	-0.762856	0	0
chrII:209308-209323	chrII;209230;209408	uORF	Scer	N	0.064	0.00686667	0.006	15	78	85	UUGUAAUGG	AUG	GAAAGGAAAUAA	0.818317	MERK	UAA	AUAGUAUAAU	YBL008W-A|chrII;209230;209408|209308,AAG	YBL008W-A|chrII;209230;209408|WT	476;1;0;0;1;0;1;1;0;361;0	201;0;0;0;0;0;1;0;0;241;0	409.466,0.894,0.000,0.000,1.000,0.000,0.751,0.777,0.000	172.905,0.000,0.000.0.000,0.000,0.000,0.751,0.000,0.000	7.877	5.258	0	0	0	0	0.0153563	0.0131989	-0.218416	0.90452	0.912441	976;88;0;0;0;0;0;1;1;66;0	1058;0;0;0;0;0;0;0;1;364;0	970.550,71.161,0.000,0.000,0.000,0.000,0.000,0.914,0.833	1052.092,0.000,0.000.0.000,0.000,0.000,0.000,0.000,0.833	1.414	7.798	0	0	0	0	0.0141414	0.00887774	-0.671661	0.0056288	0.00598882
chrII:209333-209366	chrII;209230;209408	uORF	Scer	N	0.000333333	0.0417576	0.123	33	103	42	AUAAUAUGA	AUG	AACACUCUUUCUGAGAACAGUUAUCUUUAG	0.694433	MNTLSENSYL	UAG	CUUGCCCCAC	YBL008W-A|chrII;209230;209408|209333,AAG	YBL008W-A|chrII;209230;209408|WT	447;0;0;2;0;1;0;0;0;486;0	201;0;0;0;0;0;1;0;0;241;0	384.520,0.000,0.000,1.674,0.000,0.746,0.000,0.000,0.000	172.905,0.000,0.000.0.000,0.000,0.000,0.751,0.000,0.000	10.604	5.258	0	0	0	0	0.0122532	0.0131989	0.107261	0.97086	0.972567	1368;1;2;0;0;2;0;1;0;657;0	1058;0;0;0;0;0;0;0;1;364;0	1360.361,0.809,2.000,0.000,0.000,1.819,0.000,0.914,0.000	1052.092,0.000,0.000.0.000,0.000,0.000,0.000,0.000,0.833	14.075	7.798	0	0	0	0	0.0101817	0.00887774	-0.197714	0.86038	0.86499
chrII:216602-216647	chrII;216601;216710	uORF	Scer	N	0.604667	0.353133	0.904	45	1	63	ND-too-cl	AUG	UUCUCUAAGUUGAGACCGCCUAUGGGAACCUAUAAAUCGUGA	0.732492	MFSKLRPPMGTYKS	UGA	UUGACACCGU	YBL006W-A|chrII;216601;216710|216602,AAG	YBL006W-A|chrII;216601;216710|WT	7155;10593;347;12;11;17;20;11;15;11002;1747	24160;381;7;83;5;18;25;14;14;10312;128	6154.899,9470.407,316.667,10.046,11.000,12.688,15.023,8.551,11.534	20782.999,340.624,6.388.69.486,5.000,13.434,18.779,10.883,10.765	240.049	224.995	68.43	5.014	0.285	0.022	0.056561	0.0132153	-2.0976	0	0	6542;15545;570;12;26;13;15;7;18;12447;2288	14113;6882;198;9;12;10;12;10;17;10513;868	6505.471,12570.430,570.000,10.320,23.281,11.824,12.960,6.400,14.989	14034.196,5565.114,198.000.7.740,10.745,9.096,10.368,9.143,14.156	266.658	225.225	89.776	34.058	0.337	0.151	0.0579707	0.0305067	-0.926197	0	0
chrII:216626-216647	chrII;216601;216710	uORF	Scer	N	0.053	0.467048	0.904	21	25	63	CGCCUAUGG	AUG	GGAACCUAUAAAUCGUGA	0.695814	MGTYKS	UGA	UUGACACCGU	YBL006W-A|chrII;216601;216710|216626,AAG	YBL006W-A|chrII;216601;216710|WT	20348;6681;147;13;190;27;26;14;11;14330;1484	24160;381;7;83;5;18;25;14;14;10312;128	17503.827,5972.981,134.150,10.883,190.000,20.152,19.530,10.883,8.458	20782.999,340.624,6.388.69.486,5.000,13.434,18.779,10.883,10.765	312.662	224.995	58.129	5.014	0.186	0.022	0.0333794	0.0132153	-1.33675	0	0	17413;15986;31;174;15;16;18;15;28;12392;1576	14113;6882;198;9;12;10;12;10;17;10513;868	17315.769,12927.044,31.000,149.636,13.431,14.553,15.552,13.715,23.316	14034.196,5565.114,198.000.7.740,10.745,9.096,10.368,9.143,14.156	265.48	225.225	61.839	34.058	0.233	0.151	0.0391472	0.0305067	-0.359782	8.5e-147	1.54e-146
chrII:227591-oORF	chrII;227510;227635	oORF	Scer	Y	NA	NA	NA	NA	81	NA	GCCGUAUUG	AUU	NA	NA	NA	NA	NA	YBL004W|chrII;227510;227635|227591,227714,AAG	YBL004W|chrII;227510;227635|WT	8;9;5;3;3;173;1188;6410;13730;2923;875	9;7;6;12;11;12;1611;5468;10345;6740;3092	6.882,8.046,4.563,2.512,3.000,129.119,892.371,4983.021,10557.380	7.742,6.258,5.476.10.046,11.000,8.956,1210.109,4250.727,7954.559	63.776	147.058	34.274	121.114	0.537	0.824	0.954164	0.947498	-0.0101151	1.73e-15	2.12e-15	7;13;7;2;5;7;354;3569;8127;3261;1555	16;14;9;11;10;11;1363;6727;17223;6453;3882	6.961,10.512,7.000,1.720,4.477,6.367,305.864,3263.274,6767.376	15.911,11.321,9.000.9.460,8.954,10.005,1177.664,6150.756,14341.642	69.862	138.246	61.015	152.321	0.873	1.102	0.970079	0.968974	-0.00164335	0.89728	0.901508
chrII:251105-251051	chrII;251118;251016	uORF	Scer	N	0.982333	0.832107	0.962	54	13	35	CCUCAAUGC	AUG	CUAAAUAUAGGUGGAACUUGUAGGAGCCUCGAGAAAAAACAGAAAAUCUAG	0.650731	MLNIGGTCRSLEKKQKI	UAG	AAAAACAAAC	YBR007C|chrII;251118;251016|251105,251051,AAG	YBR007C|chrII;251118;251016|WT	9;9;8;5;1;7;3141;5310;2569;4529;3577	22;7990;8400;382;9;17;16;13;13;8628;2928	7.742,8.046,7.301,4.186,1.000,5.224,2359.374,4127.900,1975.376	18.925,7143.260,7665.709.319.802,9.000,12.688,12.018,10.106,9.996	98.817	188.252	140.112	114.69	1.418	0.609	0.896173	0.170929	-2.39038	0	0	10;8;2;4;3;8;1656;2680;10994;4356;3517	13;13679;9490;180;12;14;16;12;9;7832;2108	9.944,6.469,2.000,3.440,2.686,7.277,1430.823,2450.427,9154.735	12.927,11061.493,9490.000.154.796,10.745,12.734,13.824,10.972,7.494	93.321	167.789	137.999	82.713	1.479	0.493	0.967327	0.151807	-2.67176	0	0
chrII:259639-259624	chrII;259669;259566	uORF	Scer	N	1	0.994647	0.977667	15	30	58	CGUAUAUGA	AUG	AUAAUAUAUUGA	0.780189	MIIY	UGA	UAAUAUAACU	YBR012C|chrII;259669;259566|259639,AAG	YBR012C|chrII;259669;259566|WT	2;4;1052;555;0;2;2;3;2;740;2439	2;2746;2034;191;1;1;2;1;0;1421;503	1.720,3.576,960.039,464.633,0.000,1.493,1.502,2.332,1.538	1.720,2454.993,1856.197.159.901,1.000,0.746,1.502,0.777,0.000	16.146	31.004	95.536	19.703	5.917	0.635	0.295299	0.158567	-0.89708	0	0	2;1;543;1720;340;1;1;1;0;659;1034	5;2214;519;2;1;3;1;1;5;1212;361	1.989,0.809,543.000,1479.162,304.441,0.910,0.864,0.914,0.000	4.972,1790.346,519.000.1.720,0.895,2.729,0.864,0.914,4.164	14.118	25.965	40.572	14.165	2.874	0.546	0.369559	0.112484	-1.71608	0	0
chrII:259662-259647	chrII;259669;259566	uORF	Scer	N	0.114333	0.313765	0.618	15	7	81	AACUUAUGU	AUG	UCAUCAUCUUAA	0.902986	MSSS	UAA	CACCGUAUAU	YBR012C|chrII;259669;259566|259662,AAG	YBR012C|chrII;259669;259566|WT	5;1601;4861;101;59;3;6;6;1;3008;971	2;2746;2034;191;1;1;2;1;0;1421;503	4.301,1431.334,4436.073,84.555,59.000,2.239,4.507,4.664,0.769	1.720,2454.993,1856.197.159.901,1.000,0.746,1.502,0.777,0.000	65.631	31.004	38.034	19.703	0.58	0.635	0.211775	0.158567	-0.417434	5.71e-147	1.03e-146	185;2403;4565;531;2;4;3;2;3;2926;1211	5;2214;519;2;1;3;1;1;5;1212;361	183.967,1943.181,4565.000,456.648,1.791,3.638,2.592,1.829,2.498	4.972,1790.346,519.000.1.720,0.895,2.729,0.864,0.914,4.164	62.685	25.965	47.517	14.165	0.758	0.546	0.197189	0.112484	-0.809852	9.22e-251	1.95e-250
chrII:288020-287978	chrII;288069;287925	uORF	Scer	N	0.854	0.664364	0.196	42	49	53	UAUAAACGU	ACG	UUUACCGAUUUGCAAAGUUCUCGAGUAUUUUUGGUGUAG	0.727162	MFTDLQSSRVFLV	UAG	GUCCCAUUUU	YBR023C|chrII;288069;287925|288020,287978,AAG	YBR023C|chrII;288069;287925|WT	12;11;8;138;5;14;6053;9299;8910;4701;2350	0;3;0;1;1;0;2706;1092;1187;581;0	10.323,9.834,7.301,115.530,5.000,10.449,4546.734,7228.878,6851.147	0.000,2.682,0.000.0.837,1.000,0.000,2032.622,848.902,912.717	102.57	12.677	92.05	0	0.897	0	0.911127	0.883612	-0.0442394	4.34e-153	7.94e-153	12;12;2;9;10;764;4262;9428;9744;3367;2124	0;3;0;2;1;4;2222;4;4;279;238	11.933,9.704,2.000,7.740,8.954,694.916,3682.467,8620.384,8113.857	0.000,2.426,0.000.1.720,0.895,3.638,1919.860,3.657,3.331	72.133	5.977	83.341	9.339	1.155	1.562	0.932074	0.839681	-0.150603	0	0
chrII:296058-296025	chrII;296063;296002	uORF	Scer	Y	0.479	0.125914	0.00366667	33	5	23	ND-too-cl	AUG	AUAAGAUUUUUCAUCAACCAAUCUAGCUGA	0.764335	MIRFFINQSS	UGA	GCAUACUGUU	YBR028C|chrII;296063;296002|296058,296025,AAG	YBR028C|chrII;296063;296002|WT	19;15;10;132;1820;7371;5290;1059;12;5144;5024	4;2243;2956;360;26;6;8;4;7;3024;504	16.344,13.410,9.126,110.507,1820.000,5501.370,3973.604,823.248,9.227	3.441,2005.298,2697.599.301.384,26.000,4.478,6.009,3.110,5.382	112.235	65.98	196.791	19.742	1.753	0.299	0.733565	0.19127	-1.93931	0	0	21;13;8;32;2602;6250;6536;427;696;5623;4945	26;2362;3913;333;3;7;9;2;9;3216;1340	20.883,10.512,8.000,27.519,2329.872,5684.847,5647.256,390.423,579.561	25.855,1910.026,3913.000.286.373,2.686,6.367,7.776,1.829,7.494	120.464	68.898	194.031	52.579	1.611	0.763	0.748138	0.194797	-1.94133	0	0
chrII:324043-324031	chrII;324094;323945	uORF	Scer	N	0.012	0.00714286	0.00333333	12	51	86	UGUCCUUGU	UUG	UAUCCUUAA	0.913482	MYP	UAA	AAGAAAACAG	YBR043C|chrII;324094;323945|324043,324031,AAG	YBR043C|chrII;324094;323945|WT	789;3525;420;2;4;7;6;5;3;3950;453	687;21754;1098;10;10;20;17;14;6;10854;1172	678.716,3151.438,383.285,1.674,4.000,5.224,4.507,3.887,2.307	590.974,19448.619,1002.018.8.372,10.000,14.927,12.770,10.883,4.614	86.184	236.82	17.744	45.908	0.206	0.194	0.0846818	0.0843671	-0.00537075	8.89e-17	1.1e-16	414;6214;3;158;4;3;3;2;1;3959;356	756;19190;983;85;8;14;9;7;16;9650;2446	411.688,5024.937,3.000,135.877,3.582,2.729,2.592,1.829,0.833	751.779,15517.951,983.000.73.098,7.163,12.734,7.776,6.400,13.323	84.816	206.737	13.969	95.976	0.165	0.464	0.0759662	0.0815782	0.102828	3.21e-12	3.76e-12
chrII:326073-326064	chrII;326142;326059	uORF	Scer	N	0.582667	0.538	0.603333	9	69	5	CUCUUAUGC	AUG	CUUUAA	0.678759	ML	UAA	CGAGTATGAG	YBR044C|chrII;326142;326059|326073,AAG	YBR044C|chrII;326142;326059|WT	11;13;7;7;6;304;733;5940;10964;5216;2599	15;6;6176;12649;958;2137;18;12;6;6947;1410	9.462,11.622,6.388,5.860,6.000,226.891,550.596,4617.651,8430.525	12.903,5.364,5636.121.10589.452,958.000,1594.957,13.521,9.329,4.614	113.806	151.575	101.803	55.23	0.895	0.364	0.949481	0.382572	-1.31141	0	0	14;12;4;11;212;5;587;3083;7701;5514;2447	20;190;4813;11544;2635;151;18;9;11;6567;1745	13.922,9.704,4.000,9.460,189.828,4.548,507.182,2818.906,6412.645	19.888,153.643,4813.000.9927.588,2359.421,137.346,15.552,8.229,9.160	118.129	140.688	96.015	68.47	0.813	0.487	0.959636	0.364555	-1.39635	0	0
chrII:336890-336863	chrII;336920;336818	uORF	Scer	N	0.541	0.540241	0.993333	27	30	45	AGGUUAUCU	AUC	UACACACUAUCGUUAUUAGUUUGA	0.77439	MYTLSLLV	UGA	ACUCACGUGU	YBR049C|chrII;336920;336818|336890,336863,AAG	YBR049C|chrII;336920;336818|WT	17;9;9;7;2884;7907;11226;1669;6;4344;4140	13;13;9;10;138;4545;11212;3121;204;3883;4438	14.624,8.046,8.213,5.860,2884.000,5901.415,8432.453,1297.451,4.614	11.183,11.622,8.213.8.372,138.000,3392.175,8421.937,2426.210,156.861	94.78	84.722	162.165	173.838	1.711	2.052	0.752056	0.810002	0.107085	0	0	16;20;174;224;3257;4973;7346;1771;600;5764;5021	9;9;1;7;215;2378;6124;1584;12;5256;6956	15.911,16.173,174.000,192.635,2916.369,4523.319,6347.115,1619.294,499.622	8.950,7.278,1.000.6.020,192.514,2162.971,5291.279,1448.312,9.992	123.485	112.602	197.013	272.938	1.595	2.424	0.751326	0.815155	0.117635	1.16e-228	2.38e-228
chrII:338317-338254	chrII;338336;338199	uORF	Scer	N	0	0.0351077	0	63	19	55	UUCGCAUGU	AUG	UCCGUCAAAUUUAGCGUUGUCUCGAAACUUAGGCUGUCGUUCUUGCUGUCUGUCUUCUGA	0.623484	MSVKFSVVSKLRLSFLLSVF	UGA	UAAAAUAAUA	YBR050C|chrII;338336;338199|338317,AAG	YBR050C|chrII;338336;338199|WT	3;1638;1438;69;4;5;4;7;3;2101;542	4;3408;1943;465;2;2;2;6;3;2382;480	2.581,1464.413,1312.296,57.765,4.000,3.732,3.005,5.442,2.307	3.441,3046.837,1773.151.389.287,2.000,1.493,1.502,4.664,2.307	45.841	51.972	21.23	18.802	0.463	0.362	0.165789	0.159204	-0.0584731	0.00091912	0.00100907	3;2757;1525;37;2;1;4;3;3;2336;275	2;4457;1162;115;1;4;3;1;6;3242;742	2.983,2229.442,1525.000,31.819,1.791,0.910,3.456,2.743,2.498	1.989,3604.143,1162.000.98.897,0.895,3.638,2.592,0.914,4.996	50.045	69.455	10.79	29.114	0.216	0.419	0.143477	0.11959	-0.262715	3.87e-31	5.04e-31
chrII:338327-338300	chrII;338336;338199	uORF	Scer	N	0.00233333	0.0241724	0.0693333	27	9	101	AUGGCAUGU	AUG	UCUUCGCAUGUCCGUCAAAUUUAG	0.700238	MSSHVRQI	UAG	CGUUGUCUCG	YBR050C|chrII;338336;338199|338327,AAG	YBR050C|chrII;338336;338199|WT	1;795;5928;486;3;3;5;1;4;2192;457	4;3408;1943;465;2;2;2;6;3;2382;480	0.860,710.750,5409.800,406.868,3.000,2.239,3.756,0.777,3.076	3.441,3046.837,1773.151.389.287,2.000,1.493,1.502,4.664,2.307	47.827	51.972	17.901	18.802	0.374	0.362	0.23759	0.159204	-0.577599	0	0	4;890;1332;318;2;1;6;3;3;2391;374	2;4457;1162;115;1;4;3;1;6;3242;742	3.978,719.697,1332.000,273.473,1.791,0.910,5.184,2.743,2.498	1.989,3604.143,1162.000.98.897,0.895,3.638,2.592,0.914,4.996	51.224	69.455	14.675	29.114	0.286	0.419	0.2071	0.11959	-0.792227	1.22e-206	2.42e-206
chrII:338332-338254	chrII;338336;338199	uORF	Scer	N	0.378	0.055925	0	78	4	55	ND-too-cl	AUG	GCAUGUCUUCGCAUGUCCGUCAAAUUUAGCGUUGUCUCGAAACUUAGGCUGUCGUUCUUGCUGUCUGUCUUCUGA	0.605742	MACLRMSVKFSVVSKLRLSFLLSVF	UGA	UAAAAUAAUA	YBR050C|chrII;338336;338199|338332,AAG	YBR050C|chrII;338336;338199|WT	40;1317;0;1;1;2;4;2;1;1517;18	4;3408;1943;465;2;2;2;6;3;2382;480	34.409,1177.431,0.000,0.837,1.000,1.493,3.005,1.555,0.769	3.441,3046.837,1773.151.389.287,2.000,1.493,1.502,4.664,2.307	33.099	51.972	0.705	18.802	0.021	0.362	0.0809478	0.159204	0.975811	1.5e-115	2.55e-115	120;4472;188;3;0;3;1;2;3;1586;189	2;4457;1162;115;1;4;3;1;6;3242;742	119.330,3616.273,188.000,2.580,0.000,2.729,0.864,1.829,2.498	1.989,3604.143,1162.000.98.897,0.895,3.638,2.592,0.914,4.996	33.978	69.455	7.416	29.114	0.218	0.419	0.0795505	0.11959	0.58816	5.18e-79	8.09e-79
chrII:339382-339355	chrII;339413;339352	uORF	Scer	N	0.005	0.0143793	0.058	27	31	3	UCACUAUUA	AUU	AUAAGCACAUACUACGCCACAUAG	0.721689	MISTYYAT	UAG	ATAATGAGAT	YBR052C|chrII;339413;339352|339382,339355,AAG	YBR052C|chrII;339413;339352|WT	15;41;5;93;1139;5507;4428;1276;650;3994;1917	13;9;5;2;494;3439;4951;1424;92;2989;1613	12.903,36.655,4.563,77.857,1139.000,4110.167,3326.109,991.940,499.803	11.183,8.046,4.563.1.674,494.000,2566.709,3718.963,1106.992,70.741	87.144	65.216	75.089	63.182	0.862	0.969	0.758093	0.782212	0.0451846	1.47e-50	2.13e-50	13;17;8;105;643;5302;4159;1021;279;5308;1968	17;9;6;53;992;1928;3877;893;665;3538;1080	12.927,13.747,8.000,90.298,575.752,4822.570,3593.473,933.540,232.324	16.905,7.278,6.000.45.579,888.252,1753.662,3349.818,816.504,553.747	113.716	75.796	77.22	42.377	0.679	0.559	0.766392	0.789648	0.0431282	2.49e-61	3.68e-61
chrII:368245-368233	chrII;368278;368184	uORF	Scer	N	0.0243333	0.0280714	0.0193333	12	33	49	GGUACAUGA	AUG	AUAUAUUGA	0.847488	MIY	UGA	CUGAUUUCUG	YBR063C|chrII;368278;368184|368245,AAG	YBR063C|chrII;368278;368184|WT	2;0;1;1;4;2;1159;1016;815;799;277	0;1;3;78;1333;1;2;0;0;495;1	1.720,0.000,0.913,0.837,4.000,1.493,870.587,789.820,626.676	0.000,0.894,2.738.65.300,1333.000,0.746,1.502,0.000,0.000	17.433	10.8	10.85	0.039	0.622	0.004	0.895246	0.542819	-0.721813	0	0	1;2;2;3;1;2;2;750;2253;646;347	1;0;0;0;1042;0;2;0;1;222;68	0.994,1.617,2.000,2.580,0.895,1.819,1.728,685.754,1876.080	0.994,0.000,0.000.0.000,933.023,0.000,1.728,0.000,0.833	13.84	4.756	13.616	2.668	0.984	0.561	0.977746	0.548152	-0.834883	0	0
chrII:386229-386235	chrII;386206;386285	uORF	Scer	N	0.00633333	0.00483333	0.00433333	6	23	50	AAAUAAUGU	AUG	UGA	1	M	UGA	AAAAUUAUCU	YBR074W|chrII;386206;386285|386229,AAG	YBR074W|chrII;386206;386285|WT	1;1;0;1;1;31;65;628;1136;293;581	435;124;11;0;1;1;1;0;0;142;88	0.860,0.894,0.000,0.837,1.000,23.137,48.825,488.196,873.502	374.197,110.859,10.038.0.000,1.000,0.746,0.751,0.000,0.000	6.393	3.098	22.758	3.447	3.56	1.113	0.949676	0.0339152	-4.80743	8.68e-244	1.82e-243	1;0;1;3;1;1;107;218;656;248;410	345;243;0;0;0;0;0;0;0;172;14	0.994,0.000,1.000,2.580,0.895,0.910,92.450,199.326,546.253	343.074,196.501,0.000.0.000,0.000,0.000,0.000,0.000,0.000	5.313	3.685	16.087	0.549	3.028	0.149	0.959709	0.0310565	-4.94963	1.23e-216	2.48e-216
chrII:425120-425168	chrII;425029;425182	uORF	Scer	N	0.999333	0.992354	0.996667	48	91	14	CCUUAAUGA	AUG	AUGUCCAAUAAAUAUUUAGCUCCGAACGUCAAGUCGACAGGUUGA	0.757075	MMSNKYLAPNVKSTG	UGA	UCCAUUUCAA	YBR089W|chrII;425029;425182|425120,AAG	YBR089W|chrII;425029;425182|WT	3717;609;3;0;5;1;3;2;6;1811;507	4987;1;0;2;4;2;3;0;0;1563;0	3197.451,544.461,2.738,0.000,5.000,0.746,2.253,1.555,4.614	4289.934,0.894,0.000.1.674,4.000,1.493,2.253,0.000,0.000	39.514	34.103	19.859	0	0.503	0	0.0219758	0.0101979	-1.10765	4.92e-30	6.54e-30	3209;154;4;2;1;1;4;0;5;2034;596	2482;1;2;2;1;2;4;1;1;1266;232	3191.082,124.532,4.000,1.720,0.895,0.910,3.456,0.000,4.164	2468.141,0.809,2.000.1.720,0.895,1.819,3.456,0.914,0.833	43.575	27.122	23.386	9.103	0.537	0.336	0.0137431	0.0114319	-0.265646	0.016673	0.0176037
chrII:425123-425168	chrII;425029;425182	uORF	Scer	N	1	0.991844	0.996667	45	94	14	UAAUGAUGU	AUG	UCCAAUAAAUAUUUAGCUCCGAACGUCAAGUCGACAGGUUGA	0.742175	MSNKYLAPNVKSTG	UGA	UCCAUUUCAA	YBR089W|chrII;425029;425182|425123,AAG	YBR089W|chrII;425029;425182|WT	2155;697;1;2;3;5;6;1;1;2083;683	4987;1;0;2;4;2;3;0;0;1563;0	1853.782,623.135,0.913,1.674,3.000,3.732,4.507,0.777,0.769	4289.934,0.894,0.000.1.674,4.000,1.493,2.253,0.000,0.000	45.448	34.103	26.753	0	0.589	0	0.0302178	0.0101979	-1.56714	3.46e-68	5.3e-68	2057;563;0;32;1;2;2;1;0;1661;471	2482;1;2;2;1;2;4;1;1;1266;232	2045.514,455.269,0.000,27.519,0.895,1.819,1.728,0.914,0.000	2468.141,0.809,2.000.1.720,0.895,1.819,3.456,0.914,0.833	35.584	27.122	18.481	9.103	0.519	0.336	0.0252554	0.0114319	-1.14353	3.32e-30	4.3e-30
chrII:441437-441488	chrII;441401;441514	uORF	Scer	N	0.016	0.0130196	0.00233333	51	36	26	AAAAAAUGG	AUG	GUUGUAUACGUAAAUAAAGAACAAUGUAUGGAUUAUGGUAUAGAAUAA	0.886974	MVVYVNKEQCMDYGIE	UAA	UAGUAGUCAC	YBR098W|chrII;441401;441514|441437,AAG	YBR098W|chrII;441401;441514|WT	56855;3350;167;14;273;274;47;30;49;23387;541	27694;1812;99;133;9;21;16;9;16;11222;166	48908.005,2994.984,152.402,11.720,273.000,204.501,35.304,23.321,37.677	23823.029,1619.973,90.346.111.345,9.000,15.673,12.018,6.996,12.303	510.274	244.85	21.191	6.502	0.042	0.027	0.0203494	0.0170546	-0.25482	0.671	0.685	45798;11370;317;520;27;43;51;31;37;23914;1154	19960;4021;368;14;7;6;19;8;19;12935;120	45542.273,9194.325,317.000,447.189,24.176,39.112,44.065,28.344,30.810	19848.547,3251.573,368.000.12.040,6.268,5.457,16.416,7.315,15.821	512.322	277.113	45.28	4.709	0.088	0.017	0.0251886	0.022451	-0.165992	3.82e-08	4.31e-08
chrII:441463-441511	chrII;441401;441514	uORF	Scer	N	0	0.00227083	0.000333333	48	62	4	GAACAAUGU	AUG	UAUGGAUUAUGGUAUAGAAUAAUAGUAGUCACAUAUUGCAGCUAG	0.746072	MYGLWYRIIVVTYCS	UAG	TTAAATGAGA	YBR098W|chrII;441401;441514|441463,AAG	YBR098W|chrII;441401;441514|WT	32899;4235;11;162;12;26;24;24;23;12132;309	27694;1812;99;133;9;21;16;9;16;11222;166	28300.492,3786.196,10.038,135.623,12.000,19.405,18.028,18.657,17.685	23823.029,1619.973,90.346.111.345,9.000,15.673,12.018,6.996,12.303	264.705	244.85	12.104	6.502	0.046	0.027	0.0203095	0.0170546	-0.251987	1.13e-25	1.47e-25	21982;5518;139;93;99;20;18;18;21;13298;346	19960;4021;368;14;7;6;19;8;19;12935;120	21859.257,4462.119,139.000,79.978,88.646,18.192,15.552,16.458,17.487	19848.547,3251.573,368.000.12.040,6.268,5.457,16.416,7.315,15.821	284.89	277.113	13.576	4.709	0.048	0.017	0.0249229	0.022451	-0.150696	4.72e-06	5.21e-06
chrII:441467-441488	chrII;441401;441514	uORF	Scer	N	0.000666667	0.00247619	0.00233333	21	66	26	AAUGUAUGG	AUG	GAUUAUGGUAUAGAAUAA	0.920591	MDYGIE	UAA	UAGUAGUCAC	YBR098W|chrII;441401;441514|441467,AAG	YBR098W|chrII;441401;441514|WT	40928;3482;1151;175;15;43;303;28;28;21649;423	27694;1812;99;133;9;21;16;9;16;11222;166	35207.226,3112.995,1050.385,146.506,15.000,32.093,227.600,21.767,21.530	23823.029,1619.973,90.346.111.345,9.000,15.673,12.018,6.996,12.303	472.353	244.85	16.569	6.502	0.035	0.027	0.027978	0.0170546	-0.714129	5.12e-22	6.51e-22	31934;5898;194;18;17;20;32;21;37;19785;403	19960;4021;368;14;7;6;19;8;19;12935;120	31755.687,4769.405,194.000,15.480,15.222,18.192,27.649,19.201,30.810	19848.547,3251.573,368.000.12.040,6.268,5.457,16.416,7.315,15.821	423.864	277.113	15.813	4.709	0.037	0.017	0.0200966	0.022451	0.159827	4.87e-05	5.32e-05
chrII:441474-441483	chrII;441401;441514	uORF	Scer	N	0.000333333	0.003	0.006	9	73	31	GGAUUAUGG	AUG	GUAUAG	0.748815	MV	UAG	AAUAAUAGUA	YBR098W|chrII;441401;441514|441474,AAG	YBR098W|chrII;441401;441514|WT	43616;6113;205;21;109;41;36;18;36;14978;399	27694;1812;99;133;9;21;16;9;16;11222;166	37519.507,5465.175,187.080,17.581,109.000,30.600,27.042,13.993,27.681	23823.029,1619.973,90.346.111.345,9.000,15.673,12.018,6.996,12.303	326.801	244.85	15.629	6.502	0.048	0.027	0.0215298	0.0170546	-0.33617	6.07e-42	8.5e-42	39110;4323;12;15;18;31;36;23;20;15656;593	19960;4021;368;14;7;6;19;8;19;12935;120	38891.617,3495.784,12.000,12.900,16.117,28.197,31.105,21.030,16.654	19848.547,3251.573,368.000.12.040,6.268,5.457,16.416,7.315,15.821	335.406	277.113	23.268	4.709	0.069	0.017	0.0155315	0.022451	0.531578	2.22e-53	3.19e-53
chrII:44159-44114	chrII;44252;44097	uORF	Scer	N	0.975333	0.84	0.223667	45	93	17	UAUAUAUGU	AUG	UUUAACUUUUUUGAAUAUAGAAUAUUAAUUAACACGGAAUAG	0.855087	MFNFFEYRILINTE	UAG	GCUAUUUUGA	YBL094C|chrII;44252;44097|44159,AAG	YBL094C|chrII;44252;44097|WT	4;2071;949;1;0;1;3;1;3;1530;359	11;5236;3392;311;2;14;5;7;3;4462;0	3.441,1851.526,866.043,0.837,0.000,0.746,2.253,0.777,2.307	9.462,4681.115,3095.486.260.362,2.000,10.449,3.756,5.442,2.307	33.383	97.355	14.062	0	0.421	0	0.132448	0.15366	0.214317	2.29e-17	2.83e-17	156;2902;1028;50;263;2;2;1;2;1312;46	98;5353;3026;224;5;5;9;3;7;3660;426	155.129,2346.696,1028.000,42.999,235.494,1.819,1.728,0.914,1.665	97.453,4328.692,3026.000.192.635,4.477,4.548,7.776,2.743,5.829	28.108	78.41	1.805	16.715	0.064	0.213	0.14812	0.146731	-0.0135942	6.33e-10	7.27e-10
chrII:44170-44128	chrII;44252;44097	uORF	Scer	N	0.395	0.898295	0.931	42	82	31	AGUACAUGC	AUG	CAGUAUAUAUGUUUAACUUUUUUGAAUAUAGAAUAUUAA	0.871935	MQYICLTFLNIEY	UAA	UUAACACGGA	YBL094C|chrII;44252;44097|44170,AAG	YBL094C|chrII;44252;44097|WT	98;5590;1439;6;4;5;3;1;10;3235;696	11;5236;3392;311;2;14;5;7;3;4462;0	84.302,4997.600,1313.209,5.023,4.000,3.732,2.253,0.777,7.689	9.462,4681.115,3095.486.260.362,2.000,10.449,3.756,5.442,2.307	70.584	97.355	27.262	0	0.386	0	0.11273	0.15366	0.446869	1.25e-117	2.14e-117	10;6817;1658;2;2;135;2;4;7;3169;387	98;5353;3026;224;5;5;9;3;7;3660;426	9.944,5512.552,1658.000,1.720,1.791,122.793,1.728,3.657,5.829	97.453,4328.692,3026.000.192.635,4.477,4.548,7.776,2.743,5.829	67.891	78.41	15.185	16.715	0.224	0.213	0.121431	0.146731	0.273034	2.47e-70	3.74e-70
chrII:44206-44128	chrII;44252;44097	uORF	Scer	N	0.077	0.802388	0.931	78	46	31	UGUUCAUGG	AUG	GAAGUGGCACGUUUGUGCUUCGGCGGUAAGUACAUGCAGUAUAUAUGUUUAACUUUUUUGAAUAUAGAAUAUUAA	0.779123	MEVARLCFGGKYMQYICLTFLNIEY	UAA	UUAACACGGA	YBL094C|chrII;44252;44097|44206,AAG	YBL094C|chrII;44252;44097|WT	164;5912;233;1;0;5;5;2;1;1712;0	11;5236;3392;311;2;14;5;7;3;4462;0	141.077,5285.476,212.632,0.837,0.000,3.732,3.756,1.555,0.769	9.462,4681.115,3095.486.260.362,2.000,10.449,3.756,5.442,2.307	37.354	97.355	0	0	0	0	0.0824446	0.15366	0.898244	0	0	159;4641;40;3;5;4;5;1;6;1535;100	98;5353;3026;224;5;5;9;3;7;3660;426	158.112,3752.934,40.000,2.580,4.477,3.638,4.320,0.914,4.996	97.453,4328.692,3026.000.192.635,4.477,4.548,7.776,2.743,5.829	32.885	78.41	3.924	16.715	0.119	0.213	0.0744307	0.146731	0.979207	8.49e-297	1.78e-296
chrII:447389-447365	chrII;447401;447323	uORF	Scer	N	0.003	0.00373077	0	24	12	42	GCCGAAUGA	AUG	AACAAAAAGCCUUCAUAUUAG	0.842026	MNKKPSY	UAG	ACCAGGUAAG	YBR102C|chrII;447401;447323|447389,447365,AAG	YBR102C|chrII;447401;447323|WT	24;22;17;22;11;282;4938;5157;10316;5793;5617	14;17;150;814;6481;7048;2952;416;11;7801;4762	20.645,19.669,15.514,18.418,11.000,210.472,3709.198,4008.961,7932.260	12.043,15.198,136.888.681.462,6481.000,5260.297,2217.406,323.391,8.458	126.396	170.208	220.019	186.529	1.741	1.096	0.924793	0.644297	-0.521404	0	0	12;15;10;7;11;10;3189;5707;15372;5155;3785	15;114;193;1337;8366;5248;569;830;25;6570;3435	11.933,12.130,10.000,6.020,9.850,9.096,2755.370,5218.130,12800.309	14.916,92.186,193.000.1149.791,7491.048,4773.453,491.629,758.901,20.818	110.438	140.752	148.515	134.782	1.345	0.958	0.959	0.607446	-0.658776	0	0
chrII:451987-451972	chrII;452009;451969	uORF	Scer	N	0.993	0.996647	1	15	22	3	AACACAUAU	AUA	UCGCAAGCUUGA	0.781537	MSQA	UGA	GTCATGAGAT	YBR105C|chrII;452009;451969|451987,451972,AAG	YBR105C|chrII;452009;451969|WT	1;1;254;155;1;0;1;1;0;297;367	3;0;0;44;341;455;377;19;55;423;410	0.860,0.894,231.796,129.762,1.000,0.000,0.751,0.777,0.000	2.581,0.000,0.000.36.836,341.000,339.591,283.185,14.770,42.291	6.48	9.229	14.375	16.06	2.218	1.74	0.300548	0.692749	1.20474	6.93e-170	1.3e-169	0;0;362;178;9;0;0;1;0;303;152	1;0;0;1;404;487;411;50;27;384;438	0.000,0.000,362.000,153.076,8.059,0.000,0.000,0.914,0.000	0.994,0.000,0.000.0.860,361.748,442.963,355.114,45.717,22.483	6.491	8.227	5.964	17.186	0.919	2.089	0.286437	0.711645	1.31294	1.3e-237	2.7e-237
chrII:452000-oORF	chrII;452009;451969	oORF	Scer	N	NA	NA	NA	NA	9	NA	UGUGCAUGA	AUG	NA	NA	NA	NA	NA	YBR105C|chrII;452009;451969|452000,AAG	YBR105C|chrII;452009;451969|WT	2;28;0;1;36;126;1234;1274;287;568;390	3;0;0;44;341;455;377;19;55;423;410	1.720,25.033,0.000,0.837,36.000,94.041,926.924,990.385,220.682	2.581,0.000,0.000.36.836,341.000,339.591,283.185,14.770,42.291	12.393	9.229	15.276	16.06	1.233	1.74	0.853522	0.692749	-0.301097	3.32e-243	6.96e-243	4;3;1;1;32;553;1306;790;272;500;398	1;0;0;1;404;487;411;50;27;384;438	3.978,2.426,1.000,0.860,28.653,502.995,1128.414,722.327,226.495	0.994,0.000,0.000.0.860,361.748,442.963,355.114,45.717,22.483	10.712	8.227	15.617	17.186	1.458	2.089	0.847168	0.711645	-0.251492	4.06e-184	7.79e-184
chrII:454535-oORF	chrII;454585;454530	oORF	Scer	N	NA	NA	NA	NA	50	NA	UUUGGAUGG	AUG	NA	NA	NA	NA	NA	YBR107C|chrII;454585;454530|454535,AAG	YBR107C|chrII;454585;454530|WT	504;2049;144;42;0;4;14;4;2;1727;379	83;3517;694;3;2;3;4;1;2;1768;336	433.553,1831.857,131.412,35.161,0.000,2.985,10.516,3.110,1.538	71.399,3144.286,633.334.2.512,2.000,2.239,3.005,0.777,1.538	37.681	38.575	14.846	13.161	0.394	0.341	0.0842347	0.10537	0.322979	1.97e-48	2.82e-48	264;2577;26;3;57;3;2;2;3;1799;271	163;2356;1299;148;3;5;3;1;1;1733;469	262.526,2083.885,26.000,2.580,51.039,2.729,1.728,1.829,2.498	162.090,1905.174,1299.000.127.277,2.686,4.548,2.592,0.914,0.833	38.541	37.127	10.633	18.403	0.276	0.496	0.0802176	0.143974	0.843818	1.43e-138	2.56e-138
chrII:454579-oORF	chrII;454585;454530	oORF	Scer	N	NA	NA	NA	NA	6	NA	ACUGCAUGG	AUG	NA	NA	NA	NA	NA	YBR107C|chrII;454585;454530|454579,AAG	YBR107C|chrII;454585;454530|WT	4;1;23;499;1820;840;190;3;5;1063;862	83;3517;694;3;2;3;4;1;2;1768;336	3.441,0.894,20.989,417.751,1820.000,626.937,142.719,2.332,3.845	71.399,3144.286,633.334.2.512,2.000,2.239,3.005,0.777,1.538	23.193	38.575	33.765	13.161	1.456	0.341	0.573006	0.10537	-2.44309	0	0	1;4;0;732;1992;387;639;17;4;1437;361	163;2356;1299;148;3;5;3;1;1;1733;469	0.994,3.235,0.000,629.504,1783.668,352.006,552.111,15.544,3.331	162.090,1905.174,1299.000.127.277,2.686,4.548,2.592,0.914,0.833	30.786	37.127	14.165	18.403	0.46	0.496	0.583159	0.143974	-2.01808	0	0
chrII:454776-454800	chrII;454775;454821	uORF	Scer	N	0.342333	0.222542	0.003	24	1	21	ND-too-cl	AUG	UUCGAGAGAGGUCUUUCAUAA	0.729095	MFERGLS	UAA	AAAAAUCAAG	YBR108W|chrII;454775;454821|454776,AAG	YBR108W|chrII;454775;454821|WT	2;0;1;2;0;0;113;213;165;151;640	1;2;1283;266;1;0;2;0;1;666;1216	1.720,0.000,0.913,1.674,0.000,0.000,84.880,165.582,126.873	0.860,1.788,1170.846.222.689,1.000,0.000,1.502,0.000,0.769	3.295	14.531	25.069	47.631	7.608	3.278	0.904301	0.270074	-1.74345	5.3e-192	1.03e-191	0;0;0;0;0;0;0;431;61;61;458	1;18;1253;205;135;1;0;1;2;641;1057	0.000,0.000,0.000,0.000,0.000,0.000,0.000,394.080,50.795	0.994,14.556,1253.000.176.296,120.881,0.910,0.000,0.914,1.665	1.307	13.732	17.971	41.474	13.75	3.02	0.936739	0.277975	-1.75269	3.27e-227	6.68e-227
chrII:461914-oORF	chrII;461950;461873	oORF	Scer	N	NA	NA	NA	NA	36	NA	CUUUUAUGA	AUG	NA	NA	NA	NA	NA	YBR111C|chrII;461950;461873|461914,AAG	YBR111C|chrII;461950;461873|WT	15236;1261;8;133;14;14;17;7;6;6727;487	14982;1313;6;136;151;9;9;7;8;7350;288	13106.365,1127.365,7.301,111.345,14.000,10.449,12.770,5.442,4.614	12887.868,1173.855,5.476.113.856,151.000,6.717,6.760,5.442,6.151	146.774	160.368	19.076	11.281	0.13	0.07	0.0194353	0.024479	0.33286	0.0529	0.0559	8640;2832;49;7;10;12;9;14;12;6334;538	12007;2086;62;86;8;14;14;7;13;8847;559	8591.756,2290.091,49.000,6.020,8.954,10.915,7.776,12.801,9.992	11939.955,1686.839,62.000.73.958,7.163,12.734,12.096,6.400,10.825	135.696	189.534	21.11	21.934	0.156	0.116	0.0261946	0.0217467	-0.268473	6.32e-28	8.12e-28
chrII:461922-461910	chrII;461950;461873	uORF	Scer	N	0.0283333	0.0591429	0.0806667	12	28	37	UAUAUAUGC	AUG	CUUUUAUGA	0.7705	MLL	UGA	UUAUUCUUUC	YBR111C|chrII;461950;461873|461922,AAG	YBR111C|chrII;461950;461873|WT	16894;2056;8;463;6;15;17;13;10;9046;502	14982;1313;6;136;151;9;9;7;8;7350;288	14532.615,1838.115,7.301,387.613,6.000,11.195,12.770,10.106,7.689	12887.868,1173.855,5.476.113.856,151.000,6.717,6.760,5.442,6.151	197.372	160.368	19.663	11.281	0.1	0.07	0.0272089	0.024479	-0.152538	4.86e-07	5.55e-07	13803;2707;53;64;7;35;12;10;15;8477;1026	12007;2086;62;86;8;14;14;7;13;8847;559	13725.927,2189.010,53.000,55.039,6.268,31.835,10.368,9.143,12.491	11939.955,1686.839,62.000.73.958,7.163,12.734,12.096,6.400,10.825	181.607	189.534	40.258	21.934	0.222	0.116	0.0222083	0.0217467	-0.0303039	0.0956	0.0994147
chrII:461937-461910	chrII;461950;461873	uORF	Scer	N	0	0.0286552	0.0806667	27	13	37	UUCAUAUGA	AUG	AAUCACGUAUAUAUGCUUUUAUGA	0.7842	MNHVYMLL	UGA	UUAUUCUUUC	YBR111C|chrII;461950;461873|461937,AAG	YBR111C|chrII;461950;461873|WT	15882;169;425;208;6;16;9;6;13;6144;559	14982;1313;6;136;151;9;9;7;8;7350;288	13662.069,151.090,387.848,174.133,6.000,11.942,6.760,4.664,9.996	12887.868,1173.855,5.476.113.856,151.000,6.717,6.760,5.442,6.151	134.054	160.368	21.896	11.281	0.163	0.07	0.0224439	0.024479	0.125219	2.74e-12	3.28e-12	12913;2250;260;7;10;11;15;5;16;7348;918	12007;2086;62;86;8;14;14;7;13;8847;559	12840.896,1819.458,260.000,6.020,8.954,10.005,12.960,4.572,13.323	11939.955,1686.839,62.000.73.958,7.163,12.734,12.096,6.400,10.825	157.42	189.534	36.02	21.934	0.229	0.116	0.0226287	0.0217467	-0.057355	0.247	0.254
chrII:467163-467190	chrII;467145;467247	uORF	Scer	N	0.032	0.0282222	0.066	27	18	57	ACGUAAUGC	AUG	CUGCGUGGUGUUUUCAAACCUUAG	0.706201	MLRGVFKP	UAG	UAGUUUUGGU	YBR114W|chrII;467145;467247|467163,AAG	YBR114W|chrII;467145;467247|WT	25;18;13;33;3158;19476;15118;1236;561;10196;2846	24407;4095;233;9;18;18;2789;19;19;11108;140	21.506,16.092,11.864,27.627,3158.000,14535.975,11355.944,960.845,431.369	20995.474,3661.032,212.632.7.535,18.000,13.434,2094.968,14.770,14.610	222.464	242.362	111.478	5.484	0.501	0.023	0.747683	0.0851203	-3.13485	0	0	27;36;150;850;3340;12415;3926;801;691;13052;2035	19502;11310;48;7;16;53;18;18;15;13718;376	26.849,29.111,150.000,730.981,2990.689,11292.381,3392.156,732.385,575.398	19393.105,9145.807,48.000.6.020,14.327,48.208,15.552,16.458,12.491	279.62	293.888	79.849	14.753	0.286	0.05	0.704772	0.0315826	-4.47995	0	0
chrII:494120-oORF	chrII;494191;494115	oORF	Scer	N	NA	NA	NA	NA	71	NA	CUAGUAUGA	AUG	NA	NA	NA	NA	NA	YBR128C|chrII;494191;494115|494120,AAG	YBR128C|chrII;494191;494115|WT	2;3;1;1;1;1110;1443;1520;1;1251;513	582;2268;190;0;2;2;6;5;2;1255;0	1.720,2.682,0.913,0.837,1.000,828.452,1083.915,1181.621,0.769	500.650,2027.649,173.391.0.000,2.000,1.493,4.507,3.887,1.538	27.295	27.382	20.094	0	0.736	0	0.8197	0.0788799	-3.37737	0	0	2;7;1;1;5;394;1416;352;409;895;1111	104;2250;399;0;5;3;2;4;2;961;112	1.989,5.661,1.000,0.860,4.477,358.373,1223.457,321.847,340.575	103.419,1819.458,399.000.0.000,4.477,2.729,1.728,3.657,1.665	19.174	20.588	43.593	4.395	2.274	0.213	0.852048	0.101845	-3.06456	0	0
chrII:501580-501529	chrII;501594;501442	uORF	Scer	Y	0.0746667	0.233774	0.000666667	51	14	87	UCACCAUAC	AUA	CUUCGUAUUGAUAUUAUCUCGGUUAGCUCCUUUGCUUUAAGAUACUAA	0.723686	MLRIDIISVSSFALRY	UAA	UAGGUGGUAA	YBR132C|chrII;501594;501442|501580,501529,AAG	YBR132C|chrII;501594;501442|WT	9;6;7;6230;2888;3688;7;7;3;6443;3565	19;19;11;185;914;9850;11263;9260;2656;10943;7811	7.742,5.364,6.388,5215.613,2888.000,2752.551,5.258,5.442,2.307	16.344,16.986,10.038.154.878,914.000,7351.579,8460.246,7198.561,2042.272	140.578	238.762	139.642	305.959	0.993	1.281	0.514052	0.81307	0.661465	0	0	20;5;132;3691;7806;1441;6;5;7;5925;2660	29;14;10;4;512;9286;9307;4426;2256;9577;6381	19.888,4.043,132.000,3174.179,6989.616,1310.698,5.184,4.572,5.829	28.838,11.321,10.000.3.440,458.453,8446.319,8041.465,4046.863,1878.578	126.934	205.173	104.372	250.376	0.822	1.22	0.515945	0.812278	0.654756	0	0
chrII:504384-504318	chrII;504430;504287	uORF	Scer	N	0.999	0.990441	0.912333	66	46	31	CGUGUGUGA	GUG	AAAGCGUGUGUGUGUGUGUGUGUGUGGAAUUGUGCGGACGUUCCUCUUCUUUUAUACAUAUAA	0.69333	MKACVCVCVWNCADVPLLLYI	UAA	UUUUUAUAUA	YBR133C|chrII;504430;504287|504384,504318,AAG	YBR133C|chrII;504430;504287|WT	1;98;921;1150;173;1;2;0;2;848;91	0;3;1362;1152;37;1;1;0;4;1170;0	0.860,87.614,840.490,962.754,173.000,0.746,1.502,0.000,1.538	0.000,2.682,1242.940.964.428,37.000,0.746,0.751,0.000,3.076	18.502	25.528	3.564	0	0.193	0	0.332545	0.314134	-0.0821694	7.16e-10	8.38e-10	2;1;426;1446;77;1;3;1;2;622;50	0;2;1629;638;374;1;3;3;0;710;18	1.989,0.809,426.000,1243.528,68.947,0.910,2.592,0.914,1.665	0.000,1.617,1629.000.548.666,334.885,0.910,2.592,2.743,0.000	13.325	15.211	1.962	0.706	0.147	0.046	0.354059	0.31187	-0.183043	2.62e-68	3.96e-68
chrII:536541-536565	chrII;536440;536574	uORF	Scer	N	0.000333333	0.236708	0.128333	24	101	9	ACGUAAUAG	AUA	GCCUCAAGCGAGCAUCCCUAA	0.617783	MASSEHP	UAA	ATTTCTGCCA	YBR147W|chrII;536440;536574|536541,536565,AAG	YBR147W|chrII;536440;536574|WT	4;3;313;583;299;0;0;2;1;1112;633	2;3;89;909;1813;2937;2;3;0;2398;1517	3.441,2.682,285.639,488.074,299.000,0.000,0.000,1.555,0.769	1.720,2.682,81.220.760.994,1813.000,2192.039,1.502,2.332,0.000	24.262	52.321	24.795	59.421	1.022	1.136	0.395587	0.592952	0.58392	5.84e-288	1.29e-287	4;2;245;3105;226;0;2;2;0;1304;458	3;5;1;1020;1574;3633;2;1;3;1803;1241	3.978,1.617,245.000,2670.232,202.364,0.000,1.728,1.829,0.000	2.983,4.043,1.000.877.178,1409.384,3304.488,1.728,0.914,2.498	27.936	38.627	17.971	48.694	0.643	1.261	0.380504	0.61465	0.691855	0	0
chrII:546310-546361	chrII;546306;546375	uORF	Scer	N	0.001	0.00898039	0.00166667	51	4	14	ND-too-cl	AUG	CAGAUUUCUACCGCCACCGCUAGAUUAAGAAUUUUUUUUGGUUACUGA	0.853141	MQISTATARLRIFFGY	UGA	UUUGAAUCAC	YBR152W|chrII;546306;546375|546310,AAG	YBR152W|chrII;546306;546375|WT	13;10;249;5;10;7;884;4155;9111;4247;5443	13;1848;11649;1477;8;93;21;31;6;6736;2472	11.183,8.940,227.234,4.186,10.000,5.224,664.020,3230.024,7005.702	11.183,1652.158,10630.695.1236.510,8.000,69.411,15.774,24.099,4.614	92.664	146.971	213.204	96.829	2.301	0.659	0.939983	0.242819	-1.95275	0	0	15;9;7;13;5;56;1611;4831;10537;3803;5524	19;2170;8384;942;11;7;15;4;11;6717;2842	14.916,7.278,7.000,11.180,4.477,50.936,1391.942,4417.170,8774.190	18.894,1754.766,8384.000.810.099,9.850,6.367,12.960,3.657,9.160	81.474	143.902	216.749	111.514	2.66	0.775	0.959848	0.223893	-2.09999	0	0
chrII:549047-oORF	chrII;549100;549009	oORF	Scer	Y	NA	NA	NA	NA	53	NA	ACAAAAUUU	AUU	NA	NA	NA	NA	NA	YBR154C|chrII;549100;549009|549047,548951,AAG	YBR154C|chrII;549100;549009|WT	77;74;63;51;250;4350;23056;27926;18769;22993;22516	98;33;17;134;141;1153;9577;12643;22437;11125;12372	66.237,66.158,57.493,42.696,250.000,3246.636,17318.603,21709.180,14432.007	84.302,29.503,15.514.112.182,141.000,860.545,7193.800,9828.445,17252.435	501.678	242.733	881.957	484.614	1.758	1.996	0.885063	0.920979	0.0573887	0	0	58;48;21;111;288;4216;26647;24042;26688;23763;23134	55;31;54;15;24;2059;9974;11756;19072;8678;11128	57.676,38.815,21.000,95.458,257.880,3834.771,23023.629,21982.528,22223.174	54.693,25.068,54.000.12.900,21.490,1872.816,8617.769,10748.964,15881.309	509.087	185.913	907.727	436.638	1.783	2.349	0.907217	0.924266	0.0268613	2.12e-288	4.68e-288
chrII:549082-549067	chrII;549100;549009	uORF	Scer	Y	0.037	0.0228824	0.00133333	15	18	58	CCAAUUUGA	UUG	AAUUCAAAUUAA	0.950256	MNSN	UAA	AUUAGUAGGG	YBR154C|chrII;549100;549009|549082,549067,AAG	YBR154C|chrII;549100;549009|WT	32;34;28;280;21;3257;23080;14806;3608;11052;15168	98;33;17;134;141;1153;9577;12643;22437;11125;12372	27.527,30.397,25.552,234.410,21.000,2430.872,17336.630,11509.923,2774.292	84.302,29.503,15.514.112.182,141.000,860.545,7193.800,9828.445,17252.435	241.14	242.733	594.134	484.614	2.464	1.996	0.850668	0.920979	0.114572	0	0	38;28;62;26;21;8106;19402;10722;9106;10915;10922	55;31;54;15;24;2059;9974;11756;19072;8678;11128	37.788,22.642,62.000,22.359,18.804,7373.020,16763.781,9803.538,7582.592	54.693,25.068,54.000.12.900,21.490,1872.816,8617.769,10748.964,15881.309	233.838	185.913	428.555	436.638	1.833	2.349	0.864323	0.924266	0.0967378	0	0
chrII:560002-560062	chrII;559955;560077	uORF	Scer	Y	0.0203333	0.180333	0.0223333	60	47	15	UCAUAUUGG	UUG	GAAAAAAUAUUCAAGCCAGCACAUCAGCUACAGUGGAAAAUAGCCCAGAUCAAAUAG	0.727754	MEKIFKPAHQLQWKIAQIK	UAG	AACUAUCCUU	YBR160W|chrII;559955;560077|560002,560062,AAG	YBR160W|chrII;559955;560077|WT	14;11;15;12;48;2860;12784;3554;3814;3186;4813	2;5;5;5;4;5;3202;6519;1781;3038;2874	12.043,9.834,13.689,10.046,48.000,2134.570,9602.751,2762.817,2932.691	1.720,4.470,4.563.4.186,4.000,3.732,2405.195,5067.756,1369.461	69.514	66.285	188.526	112.575	2.712	1.698	0.851201	0.889182	0.0629792	0	0	10;10;6;12;561;1149;7471;1560;1462;4108;3165	4;5;319;4;367;175;1927;2400;1731;2351;3030	9.944,8.086,6.000,10.320,502.328,1045.102,6455.118,1426.368,1217.412	3.978,4.043,319.000.3.440,328.618,159.176,1664.973,2194.413,1441.409	88.008	50.367	124.188	118.89	1.411	2.36	0.841694	0.857644	0.027084	8.44e-208	1.68e-207
chrII:565621-565663	chrII;565620;565722	uORF	Scer	N	0.00233333	0.0419048	0.066	42	1	59	ND-too-cl	AUG	AGGGGGGACCCAGGCAUAGUACACAGAAAAGCUUUGUAG	0.668371	MRGDPGIVHRKAL	UAG	ACUGUCUUUG	YBR163W|chrII;565620;565722|565621,AAG	YBR163W|chrII;565620;565722|WT	178;13211;24553;1769;17;21;38;31;25;15106;8065	8496;10211;9;11;9;18;25;10;15;9046;1014	153.120,11810.964,22406.684,1480.966,17.000,15.673,28.544,24.099,19.223	7308.459,9128.889,8.213.9.209,9.000,13.434,18.779,7.774,11.534	329.593	197.372	315.908	39.719	0.958	0.201	0.196711	0.0493162	-1.99594	0	0	35;13385;15971;1256;237;23;26;15;19;13548;10202	8796;12376;244;6;573;417;14;8;24;9541;1742	34.805,10823.751,15971.000,1080.133,212.214,20.920,22.465,13.715,15.821	8746.885,10007.825,244.000.5.160,513.073,379.293,12.096,7.315,19.985	290.246	204.402	400.304	68.352	1.379	0.334	0.183266	0.0718696	-1.35049	0	0
chrII:582400-oORF	chrII;582368;582407	oORF	Scer	N	NA	NA	NA	NA	32	NA	AUUAUAUGC	AUG	NA	NA	NA	NA	NA	YBR175W|chrII;582368;582407|582400,AAG	YBR175W|chrII;582368;582407|WT	3;1;1;0;52;105;463;369;87;323;83	0;0;0;0;8;165;173;41;0;139;29	2.581,0.894,0.913,0.000,52.000,78.367,347.784,286.854,66.897	0.000,0.000,0.000.0.000,8.000,123.148,129.950,31.873,0.000	7.047	3.033	3.251	1.136	0.461	0.375	0.830963	0.778541	-0.0940119	8.03e-26	1.04e-25	2;1;0;0;31;2;231;683;68;397;167	1;0;0;12;15;269;75;82;26;139;23	1.989,0.809,0.000,0.000,27.758,1.819,199.589,624.493,56.624	0.994,0.000,0.000.10.320,13.431,244.676,64.802,74.976,21.650	8.505	2.978	6.553	0.902	0.77	0.303	0.898846	0.765002	-0.23261	2.24e-73	3.43e-73
chrII:595560-oORF	chrII;595597;595555	oORF	Scer	N	NA	NA	NA	NA	37	NA	UAGAAAUGC	AUG	NA	NA	NA	NA	NA	YBR182C-A|chrII;595597;595555|595560,AAG	YBR182C-A|chrII;595597;595555|WT	0;0;33;77;66;28;1;0;0;181;192	35;230;0;1;0;1;0;0;0;123;43	0.000,0.000,30.115,64.463,66.000,20.898,0.751,0.000,0.000	30.108,205.626,0.000.0.837,0.000,0.746,0.000,0.000,0.000	3.949	2.684	7.521	1.684	1.905	0.627	0.462941	0.0714488	-2.69585	2.16e-68	3.31e-68	0;1;90;283;87;0;0;0;0;205;190	110;54;0;1;0;0;0;0;0;169;26	0.000,0.809,90.000,243.374,77.901,0.000,0.000,0.000,0.000	109.386,43.667,0.000.0.860,0.000,0.000,0.000,0.000,0.000	4.392	3.621	7.455	1.02	1.697	0.282	0.380205	0.0283666	-3.74451	2.39e-74	3.68e-74
chrII:595596-595575	chrII;595597;595555	uORF	Scer	N	0.00166667	0.00791304	0.0153333	21	1	20	ND-too-cl	AUG	GUUGGCGAUACUAACUAA	0.815202	MVGDTN	UAA	AAAGAAUUUG	YBR182C-A|chrII;595597;595555|595596,AAG	YBR182C-A|chrII;595597;595555|WT	19;283;1;0;0;0;1;1;0;346;129	35;230;0;1;0;1;0;0;0;123;43	16.344,253.009,0.913,0.000,0.000,0.000,0.751,0.777,0.000	30.108,205.626,0.000.0.837,0.000,0.746,0.000,0.000,0.000	7.549	2.684	5.053	1.684	0.669	0.627	0.0784053	0.0714488	-0.134041	0.175106	0.182768	260;647;18;15;0;2;1;1;1;293;146	110;54;0;1;0;0;0;0;0;169;26	258.548,523.195,18.000,12.900,0.000,1.819,0.864,0.914,0.833	109.386,43.667,0.000.0.860,0.000,0.000,0.000,0.000,0.000	6.277	3.621	5.729	1.02	0.913	0.282	0.0648084	0.0283666	-1.19199	1.81e-15	2.17e-15
chrII:602519-602537	chrII;602504;602633	uORF	Scer	Y	0.0113333	0.0407778	0.042	18	15	96	CGUUUAUGA	AUG	AAAUCCUUAUUUUAG	0.90274	MKSLF	UAG	AAUCAAAAAG	YBR187W|chrII;602504;602633|602519,602537,AAG	YBR187W|chrII;602504;602633|WT	7;8;2;1132;3243;4738;370;79;7;3175;1	7;4;3269;6246;455;338;5;5;5;4735;0	6.022,7.152,1.825,947.684,3243.000,3536.222,277.927,61.413,5.382	6.022,3.576,2983.238.5229.008,455.000,252.267,3.756,3.887,3.845	69.274	103.312	0.039	0	0.001	0	0.613888	0.359345	-0.772605	0	0	8;14;26;892;3409;1552;641;9;7;3175;193	5;517;2635;2826;352;3;7;7;7;3877;398	7.955,11.321,26.000,767.101,3052.472,1411.661,553.839,8.229,5.829	4.972,418.071,2635.000.2430.298,315.186,2.729,6.048,6.400,5.829	68.02	83.059	7.573	15.617	0.111	0.188	0.589774	0.304844	-0.952093	0	0
chrII:614304-614214	chrII;614350;614173	uORF	Scer	N	0.00133333	0.200304	0.001	90	46	41	CCGGGAUGG	AUG	GUAACAAAAAUCACGAUCUGGGUGGGUGUGGGUGUAUUGGAUUAUAGGAAGCCACGCGCUCAACCUGGAAUUACAGGAAGCUGGUAA	0.694475	MVTKITIWVGVGVLDYRKPRAQPGITGSW	UAA	UUUUUUGGGU	YBR196C-A|chrII;614350;614173|614304,AAG	YBR196C-A|chrII;614350;614173|WT	3099;217;42;2;1;4;0;1;2;1694;0	2418;654;93;189;2;3;4;2;1;2529;0	2665.833,194.003,38.329,1.674,1.000,2.985,0.000,0.777,1.538	2080.020,584.692,84.870.158.226,2.000,2.239,3.005,1.555,0.769	36.961	55.18	0	0	0	0	0.0185421	0.0530335	1.5161	9.05e-43	1.27e-42	3241;592;1;42;1;3;0;2;2;1205;0	4754;696;14;0;3;3;1;2;3;2371;160	3222.903,478.719,1.000,36.119,0.895,2.729,0.000,1.829,1.665	4727.455,562.819,14.000.0.000,2.686,2.729,0.864,1.829,2.498	25.815	50.795	0	6.278	0	0.124	0.0215761	0.0170684	-0.338106	0.0146684	0.0155011
chrII:614321-614297	chrII;614350;614173	uORF	Scer	N	0.014	0.00911539	0.004	24	29	124	UGUCAAUGA	AUG	AGGCAAGAACCGGGAUGGUAA	0.680236	MRQEPGW	UAA	CAAAAAUCAC	YBR196C-A|chrII;614350;614173|614321,AAG	YBR196C-A|chrII;614350;614173|WT	5488;3;2;2;1;1;4;1;2;1342;0	2418;654;93;189;2;3;4;2;1;2529;0	4720.906,2.682,1.825,1.674,1.000,0.746,3.005,0.777,1.538	2080.020,584.692,84.870.158.226,2.000,2.239,3.005,1.555,0.769	29.281	55.18	0	0	0	0	0.0104546	0.0530335	2.34277	5.77e-97	9.48e-97	3228;781;36;1;4;0;1;5;0;1953;63	4754;696;14;0;3;3;1;2;3;2371;160	3209.975,631.554,36.000,0.860,3.582,0.000,0.864,4.572,0.000	4727.455,562.819,14.000.0.000,2.686,2.729,0.864,1.829,2.498	41.84	50.795	2.472	6.278	0.059	0.124	0.0224895	0.0170684	-0.397922	1.28e-07	1.44e-07
chrII:614327-614297	chrII;614350;614173	uORF	Scer	N	0.01	0.00971875	0.004	30	23	124	AAAAUAUGU	AUG	UCAAUGAGGCAAGAACCGGGAUGGUAA	0.724432	MSMRQEPGW	UAA	CAAAAAUCAC	YBR196C-A|chrII;614350;614173|614327,AAG	YBR196C-A|chrII;614350;614173|WT	17813;469;61;110;8;11;9;5;9;6059;0	2418;654;93;189;2;3;4;2;1;2529;0	15323.161,419.298,55.668,92.089,8.000,8.210,6.760,3.887,6.920	2080.020,584.692,84.870.158.226,2.000,2.239,3.005,1.555,0.769	132.2	55.18	0	0	0	0	0.015045	0.0530335	1.81762	1.14e-102	1.9e-102	9783;2334;2;3;51;209;6;5;11;6702;49	4754;696;14;0;3;3;1;2;3;2371;160	9728.374,1887.384,2.000,2.580,45.666,190.101,5.184,4.572,9.160	4727.455,562.819,14.000.0.000,2.686,2.729,0.864,1.829,2.498	143.58	50.795	1.923	6.278	0.013	0.124	0.0331388	0.0170684	-0.957193	4.88e-14	5.78e-14
chrII:618545-oORF	chrII;618601;618523	oORF	Scer	N	NA	NA	NA	NA	56	NA	UCAAGUUGA	UUG	NA	NA	NA	NA	NA	YBR198C|chrII;618601;618523|618545,618523,AAG	YBR198C|chrII;618601;618523|WT	9;10;5;6;156;4164;5391;2376;846;3543;9	9;7;5;1298;5999;2210;285;705;5;3088;0	7.742,8.940,4.563,5.023,156.000,3107.815,4049.470,1847.060,650.513	7.742,6.258,4.563.1086.656,5999.000,1649.441,214.079,548.055,3.845	77.304	67.376	0.353	0	0.005	0	0.809007	0.58544	-0.466631	0	0	8;12;4;5;935;2359;4994;2776;2330;2995;184	4;10;7;1368;4973;2844;145;357;7;3901;308	7.955,9.704,4.000,4.300,837.214,2145.689,4314.932,2538.204,1940.198	3.978,8.086,7.000.1176.450,4452.903,2586.833,125.283,326.419,5.829	64.163	83.573	7.22	12.085	0.113	0.145	0.839106	0.590143	-0.507788	0	0
chrII:618889-618907	chrII;618815;618908	uORF	Scer	Y	0.00466667	0.0226667	0.0783333	18	74	1	ACAAGGUGA	GUG	AACCAUACGAACUGA	0.713462	MNHTN	UGA	TATGAGATCT	YBR199W|chrII;618815;618908|618889,618907,AAG	YBR199W|chrII;618815;618908|WT	22;48;8;666;7012;6918;7313;1895;1072;8387;9038	38;14;11;847;7723;14767;3345;272;14;10237;10691	18.925,42.913,7.301,557.560,7012.000,5163.272,5493.188,1473.140,824.291	32.688,12.516,10.038.709.089,7723.000,11021.398,2512.610,211.448,10.765	182.994	223.358	354.021	418.769	1.935	1.875	0.702084	0.659283	-0.0907454	9.46e-225	1.93e-224	17;28;20;1380;7978;6101;5761;12;19;10517;7160	25;93;576;1337;10443;10010;2555;14;1990;10587;8918	16.905,22.642,20.000,1186.770,7143.627,5549.321,4977.638,10.972,15.821	24.860,75.204,576.000.1149.791,9350.827,9104.852,2207.580,12.801,1657.079	225.311	226.811	280.942	349.922	1.247	1.543	0.660023	0.648131	-0.0262301	9.85e-26	1.25e-25
chrII:620817-620832	chrII;620816;620871	uORF	Scer	N	0.00366667	0.0022	0.00333333	15	1	39	ND-too-cl	AUG	GAUGCACGUUGA	0.698078	MDAR	UGA	AAGCACUGUG	YBR200W|chrII;620816;620871|620817,AAG	YBR200W|chrII;620816;620871|WT	1016;860;1;1;1;3;4;2;1;1159;246	4;38;442;1800;106;1;1;2;2;1045;816	873.987,768.861,0.913,0.837,1.000,2.239,3.005,1.555,0.769	3.441,33.973,403.362.1506.919,106.000,0.746,0.751,1.555,1.538	25.288	22.801	9.636	31.963	0.381	1.402	0.0458865	0.365496	2.99371	0	0	1276;944;124;1;1;3;3;1;3;1179;540	1;0;512;1669;1;0;1;61;1;1247;1012	1268.875,763.364,124.000,0.860,0.895,2.729,2.592,0.914,2.498	0.994,0.000,512.000.1435.304,0.895,0.000,0.864,55.775,0.833	25.258	26.715	21.188	39.709	0.839	1.486	0.0478824	0.360173	2.91112	0	0
chrII:620827-oORF	chrII;620816;620871	oORF	Scer	N	NA	NA	NA	NA	11	NA	GCACGUUGA	UUG	NA	NA	NA	NA	NA	YBR200W|chrII;620816;620871|620827,620871,AAG	YBR200W|chrII;620816;620871|WT	56;440;1938;160;1;93;59;0;1;922;879	4;38;442;1800;106;1;1;2;2;1045;816	48.173,393.371,1768.589,133.948,1.000,69.411,44.318,0.000,0.769	3.441,33.973,403.362.1506.919,106.000,0.746,0.751,1.555,1.538	20.117	22.801	34.431	31.963	1.712	1.402	0.246251	0.365496	0.569725	0	0	44;541;1621;248;3;2;4;4;4;1179;780	1;0;512;1669;1;0;1;61;1;1247;1012	43.754,437.478,1621.000,213.275,2.686,1.819,3.456,3.657,3.331	0.994,0.000,512.000.1435.304,0.895,0.000,0.864,55.775,0.833	25.258	26.715	30.605	39.709	1.212	1.486	0.219908	0.360173	0.711792	0	0
chrII:650326-650344	chrII;650297;650367	uORF	Scer	Y	0.001	0.00577778	0.00966667	18	29	23	UGUUCAUGA	AUG	AAGUGUGCAAAAUAA	0.893622	MKCAK	UAA	GAGAGUGUAU	YBR213W|chrII;650297;650367|650326,650344,AAG	YBR213W|chrII;650297;650367|WT	7;2;2;5;1;4;87;1581;2809;1378;167	5;5;3;319;1999;1468;3;2;2;1279;305	6.022,1.788,1.825,4.186,1.000,2.985,65.350,1229.041,2159.918	4.301,4.470,2.738.267.059,1999.000,1095.647,2.253,1.555,1.538	30.066	27.906	6.541	11.947	0.218	0.428	0.953464	0.589186	-0.694456	0	0	2;3;0;4;3;8;6;2660;2334;1592;320	3;2;75;853;2398;687;370;2;4;1654;412	1.989,2.426,0.000,3.440,2.686,7.277,5.184,2432.141,1943.529	2.983,1.617,75.000.733.561,2147.207,624.878,319.689,1.829,3.331	34.106	35.434	12.556	16.166	0.368	0.456	0.957826	0.559708	-0.775089	0	0
chrII:668675-668711	chrII;668646;668720	uORF	Scer	N	0.627667	0.483972	0.0213333	36	29	10	UUCUCAUGA	AUG	ACGAGCAAGGCAAAAGCACUCGUCCUCAGCUAA	0.519814	MTSKAKALVLS	UAA	GTCGTATGGT	YBR223W-A|chrII;668646;668720|668675,AAG	YBR223W-A|chrII;668646;668720|WT	27;9606;13859;856;40;220;264;24;20;13029;6014	6890;13021;139;62;16;14;17;20;16;10785;695	23.226,8588.004,12647.507,716.624,40.000,164.198,198.305,18.657,15.379	5926.940,11641.099,126.849.51.905,16.000,10.449,12.770,15.548,12.303	284.276	235.315	235.57	27.223	0.829	0.116	0.195443	0.0586424	-1.73673	0	0	134;10730;14591;1625;285;21;25;13;528;14089;5070	8745;9503;611;11;9;18;890;11;23;9455;1445	133.252,8676.791,14591.000,1397.465,255.193,19.101,21.601,11.886,439.667	8696.170,7684.580,611.000.9.460,8.059,16.372,768.981,10.058,19.152	301.836	202.559	198.935	56.699	0.659	0.28	0.205537	0.0819722	-1.32619	0	0
chrII:668716-oORF	chrII;668646;668720	oORF	Scer	N	NA	NA	NA	NA	70	NA	GUCGUAUGG	AUG	NA	NA	NA	NA	NA	YBR223W-A|chrII;668646;668720|668716,AAG	YBR223W-A|chrII;668646;668720|WT	2139;13063;245;178;6;11;15;18;20;9452;636	6890;13021;139;62;16;14;17;20;16;10785;695	1840.018,11678.648,223.583,149.018,6.000,8.210,11.267,13.993,15.379	5926.940,11641.099,126.849.51.905,16.000,10.449,12.770,15.548,12.303	206.23	235.315	24.912	27.223	0.121	0.116	0.0765901	0.0586424	-0.385214	2.16e-225	4.4e-225	3784;18203;136;83;12;19;10;18;17;9628;1486	8745;9503;611;11;9;18;890;11;23;9455;1445	3762.871,14719.816,136.000,71.378,10.745,17.282,8.640,16.458,14.156	8696.170,7684.580,611.000.9.460,8.059,16.372,768.981,10.058,19.152	206.266	202.559	58.307	56.699	0.283	0.28	0.0638757	0.0819722	0.359866	0	0
chrII:675190-675166	chrII;675192;675134	uORF	Scer	N	0.012	0.00476923	0.000666667	24	2	32	ND-too-cl	ACG	GCUCAUCAAACAAAACCAUAG	0.984742	MAHQTKP	UAG	AAGACAAGGC	YBR227C|chrII;675192;675134|675190,675166,AAG	YBR227C|chrII;675192;675134|WT	10;9;5;1;110;45;948;4087;4188;2508;6872	7;11;9;7;8;529;2690;5450;6698;3193;7898	8.602,8.046,4.563,0.837,110.000,33.586,712.094,3177.162,3220.270	6.022,9.834,8.213.5.860,8.000,394.821,2020.604,4236.734,5150.279	54.721	69.667	269.178	309.367	4.919	4.441	0.924154	0.919475	-0.00732171	3.91e-10	4.59e-10	6;5;0;4;5;19;853;2878;6019;2036;5600	13;15;3;4;5;93;2109;5131;6161;2711;6570	5.966,4.043,0.000,3.440,4.477,17.282,737.012,2631.466,5012.039	12.927,12.130,3.000.3.440,4.477,84.591,1822.225,4691.471,5130.282	43.618	58.079	219.732	257.792	5.038	4.439	0.961316	0.942037	-0.029226	1.44e-99	2.35e-99
chrII:683124-683097	chrII;683147;683090	uORF	Scer	N	0.000333333	0.0116897	0.003	27	23	7	AUAAUAUUG	AUU	GUUUCAAGAAAGAAAACCCACUAG	0.817377	MVSRKKTH	UAG	CCTATAAATG	YBR231C|chrII;683147;683090|683124,683097,AAG	YBR231C|chrII;683147;683090|WT	2;6;1;27;497;2595;554;390;42;1457;1829	2;3;8;1;204;1526;1391;420;56;1137;1639	1.720,5.364,0.913,22.604,497.000,1936.787,416.139,303.179,32.295	1.720,2.682,7.301.0.837,204.000,1138.935,1044.855,326.501,43.060	31.79	24.808	71.642	64.2	2.254	2.588	0.718013	0.767554	0.0962581	2.84e-75	4.45e-75	5;3;2;16;1364;2147;819;140;4;1448;2422	10;3;2;0;73;1492;655;174;29;773;2138	4.972,2.426,2.000,13.760,1221.347,1952.859,707.635,128.007,3.331	9.944,2.426,2.000.0.000,65.365,1357.087,565.935,159.095,24.148	31.021	16.56	95.034	83.89	3.064	5.066	0.686562	0.751302	0.130003	2.02e-92	3.26e-92
chrII:683369-683399	chrII;683318;683427	uORF	Scer	N	0.188	0.0397333	0.00266667	30	51	28	UAACAAUUU	AUU	UUAAUCGUCCAGCGCGGCAUUAAAUAA	0.57809	MLIVQRGIK	UAA	UCUUUCUGUA	YBR233W|chrII;683318;683427|683369,683399,AAG	YBR233W|chrII;683318;683427|WT	10;301;7883;4932;10;9;16;10;9;7565;7690	3;1078;6319;656;68;5;8;3;6;2395;2132	8.602,269.102,7193.903,4128.957,10.000,6.717,12.018,7.774,6.920	2.581,963.759,5766.621.549.188,68.000,3.732,6.009,2.332,4.614	165.059	52.256	301.219	83.511	1.825	1.598	0.294836	0.238688	-0.304787	0	0	18;921;9357;9832;110;15;13;9;12;6908;6524	5;1124;5843;681;4;4;8;2;8;2977;1223	17.899,744.765,9357.000,8455.305,98.496,13.644,11.232,8.229,9.992	4.972,908.920,5843.000.585.645,3.582,3.638,6.912,1.829,6.662	147.994	63.778	255.987	47.988	1.73	0.752	0.29888	0.230646	-0.373891	0	0
chrII:686617-686602	chrII;686638;686592	uORF	Scer	N	0.00566667	0.593	0.993333	15	21	10	AGUAAACGU	ACG	UAUAUUAGUUGA	0.889823	MYIS	UGA	GAGTCTCCTA	YBR234C|chrII;686638;686592|686617,686602,AAG	YBR234C|chrII;686638;686592|WT	0;0;0;0;11;683;251;148;1;196;191	1;0;1;0;22;721;2;0;2;274;268	0.000,0.000,0.000,0.000,11.000,509.759,188.540,115.053,0.769	0.860,0.000,0.913.0.000,22.000,538.121,1.502,0.000,1.538	4.276	5.978	7.482	10.498	1.75	1.756	0.761893	0.704718	-0.112543	9.14e-33	1.23e-32	1;1;3;36;96;342;255;55;0;224;557	1;0;0;0;191;71;454;127;0;302;399	0.994,0.809,3.000,30.959,85.960,311.075,220.326,50.289,0.000	0.994,0.000,0.000.0.000,171.024,64.580,392.267,116.121,0.000	4.799	6.47	21.855	15.656	4.554	2.42	0.726443	0.774563	0.0925326	1.48e-14	1.76e-14
chrII:699956-oORF	chrII;700092;699943	oORF	Scer	N	NA	NA	NA	NA	136	NA	CAUUGAUGA	AUG	NA	NA	NA	NA	NA	YBR239C|chrII;700092;699943|699956,AAG	YBR239C|chrII;700092;699943|WT	1;3;1318;657;0;0;1;3;0;791;1057	0;1696;255;0;0;0;2;0;0;940;301	0.860,2.682,1202.786,550.025,0.000,0.000,0.751,2.332,0.000	0.000,1516.266,232.709.0.000,0.000,0.000,1.502,0.000,0.000	17.259	20.51	41.403	11.79	2.399	0.575	0.29182	0.099673	-1.5498	0	0	3;75;176;1289;25;1;2;2;0;1019;389	0;1133;2;0;0;2;0;0;2;514;198	2.983,60.649,176.000,1108.512,22.385,0.910,1.728,1.829,0.000	0.000,916.198,2.000.0.000,0.000,1.819,0.000,0.000,1.665	21.831	11.012	15.263	7.769	0.699	0.706	0.35257	0.0753539	-2.22616	0	0
chrII:723209-723218	chrII;723208;723269	uORF	Scer	N	0.000666667	0.000222222	0.000333333	9	1	51	ND-too-cl	AUG	GGCUAA	0.658002	MG	UAA	UCAUAACAGA	YBR253W|chrII;723208;723269|723209,AAG	YBR253W|chrII;723208;723269|WT	0;857;308;2;2;0;2;0;2;738;400	2007;2284;130;2;1;7;2;2;6;2124;2113	0.000,766.179,281.076,1.674,2.000,0.000,1.502,0.000,1.538	1726.468,2041.953,118.636.1.674,1.000,5.224,1.502,1.555,4.614	16.102	46.343	15.668	82.767	0.973	1.786	0.126558	0.0548299	-1.20676	8.62e-172	1.63e-171	1;911;522;2;68;0;0;2;0;1019;636	507;2430;146;3;3;78;2;1;3;2422;1082	0.994,736.678,522.000,1.720,60.888,0.000,0.000,1.829,0.000	504.169,1965.014,146.000.2.580,2.686,70.947,1.728,0.914,2.498	21.831	51.888	24.955	42.455	1.143	0.818	0.160783	0.0881096	-0.867744	5.61e-120	9.64e-120
chrII:723232-oORF	chrII;723208;723269	oORF	Scer	Y	NA	NA	NA	NA	24	NA	UUGUGAUGA	AUG	NA	NA	NA	NA	NA	YBR253W|chrII;723208;723269|723232,723292,AAG	YBR253W|chrII;723208;723269|WT	1;1074;215;129;1;5;1;1;3;711;1458	2007;2284;130;2;1;7;2;2;6;2124;2113	0.860,960.183,196.206,107.996,1.000,3.732,0.751,0.777,2.307	1726.468,2041.953,118.636.1.674,1.000,5.224,1.502,1.555,4.614	15.513	46.343	57.11	82.767	3.681	1.786	0.13497	0.0548299	-1.2996	5.01e-189	9.71e-189	44;292;72;107;1;2;2;1;0;459;507	507;2430;146;3;3;78;2;1;3;2422;1082	43.754,236.125,72.000,92.018,0.895,1.819,1.728,0.914,0.000	504.169,1965.014,146.000.2.580,2.686,70.947,1.728,0.914,2.498	9.833	51.888	19.894	42.455	2.023	0.818	0.16481	0.0881096	-0.903428	3.62e-28	4.65e-28
chrII:724449-oORF	chrII;724419;724455	oORF	Scer	N	NA	NA	NA	NA	30	NA	AACGGAUGA	AUG	NA	NA	NA	NA	NA	YBR255W|chrII;724419;724455|724449,AAG	YBR255W|chrII;724419;724455|WT	0;0;199;585;99;24;17;2;1;452;293	0;32;618;120;1;0;2;2;0;264;147	0.000,0.000,181.604,489.749,99.000,17.912,12.770,1.555,0.769	0.000,28.609,563.977.100.461,1.000,0.000,1.502,1.555,0.000	9.862	5.76	11.477	5.758	1.164	1	0.393574	0.26391	-0.576585	8.43e-105	1.41e-104	0;0;347;568;28;14;30;1;1;612;280	0;188;376;98;20;0;0;2;0;271;182	0.000,0.000,347.000,488.468,25.072,12.734,25.921,0.914,0.833	0.000,152.026,376.000.84.278,17.908,0.000,0.000,1.829,0.000	13.111	5.806	10.987	7.141	0.838	1.23	0.349961	0.228009	-0.618105	6.06e-72	9.25e-72
chrII:730330-730354	chrII;730299;730386	uORF	Scer	N	0.009	0.0226667	0.000333333	24	31	32	UUAAUAUGG	AUG	GAAGCAGCAAGCGGUAUAUGA	0.773935	MEAASGI	UGA	ACUCAGUUUU	YBR259W|chrII;730299;730386|730330,AAG	YBR259W|chrII;730299;730386|WT	16;5;13;7;2125;2803;7351;675;1530;5544;3582	355;6366;355;142;4;3;7;1;1;3607;413	13.764,4.470,11.864,5.860,2125.000,2092.028,5521.732,524.733,1176.460	305.379,5691.363,323.967.118.879,4.000,2.239,5.258,0.777,0.769	120.963	78.7	140.308	16.177	1.16	0.206	0.775004	0.0889745	-3.12274	0	0	9;17;5;4;1073;2108;11926;1071;41;4751;4247	180;8038;690;211;2;8;10;4;8;2895;538	8.950,13.747,5.000,3.440,960.781,1917.385,10304.342,979.257,34.141	178.995,6499.911,690.000.181.455,1.791,7.277,8.640,3.657,6.662	101.783	62.021	166.643	21.11	1.637	0.34	0.807992	0.0955678	-3.07975	0	0
chrII:730350-oORF	chrII;730299;730386	oORF	Scer	N	NA	NA	NA	NA	51	NA	GGUAUAUGA	AUG	NA	NA	NA	NA	NA	YBR259W|chrII;730299;730386|730350,AAG	YBR259W|chrII;730299;730386|WT	556;5047;3228;5;4;10;13;4;10;6103;747	355;6366;355;142;4;3;7;1;1;3607;413	478.284,4512.144,2945.822,4.186,4.000,7.464,9.765,3.110,7.689	305.379,5691.363,323.967.118.879,4.000,2.239,5.258,0.777,0.769	133.16	78.7	29.26	16.177	0.22	0.206	0.138199	0.0889745	-0.635282	2.41e-171	4.54e-171	169;8402;1767;4;4;13;12;10;14;4201;1300	180;8038;690;211;2;8;10;4;8;2895;538	168.056,6794.259,1767.000,3.440,3.582,11.824,10.368,9.143,11.658	178.995,6499.911,690.000.181.455,1.791,7.277,8.640,3.657,6.662	90	62.021	51.009	21.11	0.567	0.34	0.108182	0.0955678	-0.178867	5.83e-21	7.22e-21
chrII:736074-736065	chrII;736084;736040	uORF	Scer	N	0.0133333	0.0102727	0.002	9	10	25	AGACAGUGG	GUG	GACUAA	0.732187	MD	UAA	GAACCAGCAG	YBR262C|chrII;736084;736040|736074,736065,AAG	YBR262C|chrII;736084;736040|WT	3;1;2;1;51;503;1222;636;307;646;1674	2;2;10;0;38;177;1144;462;25;475;1525	2.581,0.894,1.825,0.837,51.000,375.416,917.910,494.415,236.061	1.720,1.788,9.126.0.000,38.000,132.105,859.320,359.151,19.223	14.095	10.364	65.571	59.735	4.652	5.764	0.833171	0.822836	-0.0180069	0.021048	0.0224756	2;6;1;1;10;4;737;858;366;732;1870	1;3;0;2;4;77;814;214;199;543;1056	1.989,4.852,1.000,0.860,8.954,3.638,636.785,784.502,304.769	0.994,2.426,0.000.1.720,3.582,70.037,703.315,195.668,165.708	15.682	11.633	73.375	41.435	4.679	3.562	0.902172	0.866242	-0.0586332	1.17e-39	1.57e-39
chrII:749574-oORF	chrII;749543;749593	oORF	Scer	N	NA	NA	NA	NA	31	NA	UGUAUAUGG	AUG	NA	NA	NA	NA	NA	YBR274W|chrII;749543;749593|749574,749593,AAG	YBR274W|chrII;749543;749593|WT	1;0;1;0;103;1154;658;184;1;318;1235	5;3;0;342;818;838;1;98;0;640;1533	0.860,0.000,0.913,0.000,103.000,861.292,494.259,143.038,0.769	4.301,2.682,0.000.286.315,818.000,625.444,0.751,76.183,0.000	6.938	13.964	48.375	60.048	6.972	4.3	0.753362	0.593108	-0.345048	1.06e-242	2.21e-242	1;0;0;34;168;432;131;573;1;442;1321	0;1;20;416;1144;502;173;2;1;751;1271	0.994,0.000,0.000,29.239,150.430,392.937,113.187,523.916,0.833	0.000,0.809,20.000.357.751,1024.356,456.607,149.476,1.829,0.833	9.469	16.089	51.833	49.871	5.474	3.1	0.786819	0.573008	-0.457477	1.51e-233	3.11e-233
chrII:760086-760053	chrII;760138;760043	uORF	Scer	N	0.682667	0.934114	0.980333	33	52	10	UUGUCAUUG	AUU	GAGGUAGAAGGGGCGGGUAUAGAAAACUAG	0.617107	MEVEGAGIEN	UAG	AGCAACAACC	YBR276C|chrII;760138;760043|760086,760053,AAG	YBR276C|chrII;760138;760043|WT	14;2508;16467;2249;11;17;19;12;15;10783;9491	51;89;5763;9442;2193;21;24;13;30;8552;8575	12.043,2242.215,15027.527,1882.811,11.000,12.688,14.272,9.329,11.534	43.871,79.568,5259.224.7904.625,2193.000,15.673,18.028,10.106,23.068	235.271	186.594	371.765	335.885	1.58	1.8	0.241707	0.363294	0.58788	0	0	21;2678;20492;1831;193;9;14;9;19;10205;11095	11;31;7077;14800;1676;229;14;12;14;9074;7363	20.883,2165.559,20492.000,1574.620,172.815,8.186,12.096,8.229,15.821	10.939,25.068,7077.000.12727.677,1500.717,208.293,12.096,10.972,11.658	218.627	194.397	435.343	288.908	1.991	1.486	0.235773	0.349192	0.566618	0	0
chrII:770479-770449	chrII;770559;770415	uORF	Scer	Y	0.997	0.890031	0.993	30	80	34	UUGAAUUGA	UUG	AAUCCAUUACUCGUACGCAUUUUUUAG	0.623905	MNPLLVRIF	UAG	CACAUUUGCC	YBR283C|chrII;770559;770415|770479,770449,AAG	YBR283C|chrII;770559;770415|WT	17;10;13;8;13;674;9567;10829;10864;4489;8833	7;9;4;5;102;1269;3689;2313;4319;2655;4050	14.624,8.940,11.864,6.697,13.000,503.042,7186.289,8418.273,8353.633	6.022,8.046,3.650.4.186,102.000,947.122,2771.006,1798.085,3321.000	97.944	57.929	345.991	158.639	3.533	2.739	0.90483	0.887528	-0.027854	6.72e-31	8.97e-31	15;13;1;9;10;273;7739;8464;3966;5783;7284	10;8;2;1;72;1035;4615;4498;989;2536;2929	14.916,10.512,1.000,7.740,8.954,248.314,6686.676,7738.962,3302.500	9.944,6.469,2.000.0.860,64.470,941.411,3987.468,4112.695,823.543	123.892	54.33	285.808	114.927	2.307	2.115	0.904401	0.874194	-0.0490101	1.3e-150	2.37e-150
chrII:773895-773919	chrII;773845;773921	uORF	Scer	N	0.453667	0.697333	0.814333	24	50	2	UCGAAAUCU	AUC	UCUAAGCUCGCUUAUAGUUGA	0.71172	MSKLAYS	UGA	CAATGAGATC	YBR285W|chrII;773845;773921|773895,773919,AAG	YBR285W|chrII;773845;773921|WT	14;16;49;6;86;23;431;202;19160;7733;9628	17;14;11;14;14;262;1615;4625;17736;9609;9877	12.043,14.304,44.717,5.023,86.000,17.166,323.747,157.031,14732.658	14.624,12.516,10.038.11.720,14.000,195.545,1213.113,3595.393,13637.705	168.724	209.656	377.131	386.884	2.235	1.845	0.98825	0.962178	-0.0385724	6.82e-273	1.48e-272	23;10;58;10;118;19;633;584;19367;7000;8232	15;16;9;183;15;242;1817;6959;24245;8955;13648	22.872,8.086,58.000,8.600,105.659,17.282,546.927,533.974,16126.957	14.916,12.938,9.000.157.376,13.431,220.117,1569.930,6362.882,20188.881	149.965	191.848	323.005	535.517	2.154	2.791	0.98509	0.968223	-0.0249161	0	0
chrII:784621-784594	chrII;784658;784572	uORF	Scer	Y	0.649667	0.364276	0.004	27	37	22	UCACAAUGA	AUG	AAAGAACUCCAAAGUAGAGCUUGA	0.774793	MKELQSRA	UGA	AUUAUAAAUU	YBR291C|chrII;784658;784572|784621,784594,AAG	YBR291C|chrII;784658;784572|WT	16;4499;4753;624;3;7;10;8;5;3942;1663	5173;2750;4;2;118;4;6;9;3;5366;30	13.764,4022.218,4337.514,522.398,3.000,5.224,7.512,6.219,3.845	4449.936,2458.569,3.650.1.674,118.000,2.985,4.507,6.996,2.307	86.009	117.079	65.14	1.175	0.757	0.01	0.179266	0.0436888	-2.03677	0	0	11;4734;5694;851;1;274;8;3;3;4000;1183	8553;1166;17;3;3;106;2;9;6;4052;655	10.939,3828.139,5694.000,731.841,0.895,249.224,6.912,2.743,2.498	8505.242,942.883,17.000.2.580,2.686,96.415,1.728,8.229,4.996	85.694	86.808	46.418	25.701	0.542	0.296	0.199146	0.0235231	-3.08168	0	0
chrII:784629-784617	chrII;784658;784572	uORF	Scer	N	0.009	0.273929	0.667	12	29	45	UUUUGAUGU	AUG	UCACAAUGA	0.934231	MSQ	UGA	AAGAACUCCA	YBR291C|chrII;784658;784572|784629,AAG	YBR291C|chrII;784658;784572|WT	7567;373;2;0;4;2;7;5;5;3182;69	5173;2750;4;2;118;4;6;9;3;5366;30	6509.311,333.471,1.825,0.000,4.000,1.493,5.258,3.887,3.845	4449.936,2458.569,3.650.1.674,118.000,2.985,4.507,6.996,2.307	69.427	117.079	2.703	1.175	0.039	0.01	0.0142502	0.0436888	1.61628	9.67e-230	1.98e-229	3943;853;153;3;5;6;5;3;1;3755;509	8553;1166;17;3;3;106;2;9;6;4052;655	3920.983,689.777,153.000,2.580,4.477,5.457,4.320,2.743,0.833	8505.242,942.883,17.000.2.580,2.686,96.415,1.728,8.229,4.996	80.445	86.808	19.972	25.701	0.248	0.296	0.0278159	0.0235231	-0.241834	9.65e-12	1.12e-11
chrII:792800-792824	chrII;792797;792848	uORF	Scer	Y	0.00266667	0.00329167	0.00133333	24	3	24	D-too-clo	AUG	CUUCCAGGAUUUAUACAAUGA	0.7541	MLPGFIQ	UGA	AAGAGCCCAA	YBR295W|chrII;792797;792848|792800,792824,AAG	YBR295W|chrII;792797;792848|WT	3241;1187;17;2;1;2;5;0;4;2260;767	4540;434;9;1;2;2;7;0;5;1951;450	2787.984,1061.208,15.514,1.674,1.000,1.493,3.756,0.000,3.076	3905.415,388.007,8.213.0.837,2.000,1.493,5.258,0.000,3.845	49.31	42.568	30.044	17.627	0.609	0.414	0.0307182	0.0179241	-0.777189	2.05e-47	2.93e-47	3280;1269;3;1;3;5;5;5;1;2039;462	3275;886;139;14;3;7;6;3;4;2265;201	3261.685,1026.174,3.000,0.860,2.686,4.548,4.320,4.572,0.833	3256.713,716.462,139.000.12.040,2.686,6.367,5.184,2.743,3.331	43.683	48.524	18.128	7.887	0.415	0.163	0.0268034	0.0322337	0.266152	0.119924	0.124214
chrII:792820-oORF	chrII;792797;792848	oORF	Scer	N	NA	NA	NA	NA	23	NA	AUACAAUGA	AUG	NA	NA	NA	NA	NA	YBR295W|chrII;792797;792848|792820,792849,AAG	YBR295W|chrII;792797;792848|WT	5;7;11;3;396;3524;1347;551;59;1620;1324	4540;434;9;1;2;2;7;0;5;1951;450	4.301,6.258,10.038,2.512,396.000,2630.149,1011.804,428.338,45.367	3905.415,388.007,8.213.0.837,2.000,1.493,5.258,0.000,3.845	35.346	42.568	51.861	17.627	1.467	0.414	0.740864	0.0179241	-5.36923	0	0	6;8;1;2;324;1551;2152;447;416;1708;1427	3275;886;139;14;3;7;6;3;4;2265;201	5.966,6.469,1.000,1.720,290.115,1410.752,1859.378,408.709,346.404	3256.713,716.462,139.000.12.040,2.686,6.367,5.184,2.743,3.331	36.591	48.524	55.992	7.887	1.53	0.163	0.795698	0.0322337	-4.62558	0	0
chrII:80812-80839	chrII;80771;80896	uORF	Scer	N	0.603667	0.989259	0.963667	27	41	57	CUUUAAUGG	AUG	GUUCCCCUUUUUGUAUUUCCAUAA	0.749932	MVPLFVFP	UAA	UUAUACCAAA	YBL077W|chrII;80771;80896|80812,AAG	YBL077W|chrII;80771;80896|WT	463;3762;1;1;3;1;4;2;2;2198;206	1881;782;0;1;2;0;0;2;1;1155;0	398.283,3363.322,0.913,0.837,3.000,0.746,3.005,1.555,1.538	1618.080,699.128,0.000.0.837,2.000,0.000,0.000,1.555,0.769	47.958	25.201	8.069	0	0.168	0	0.0716279	0.0309253	-1.21173	0	0	1145;5272;125;1;25;7;0;1;4;2586;236	3689;935;68;108;1;2;1;2;1;982;261	1138.607,4263.191,125.000,0.860,22.385,6.367,0.000,0.914,3.331	3668.401,756.086,68.000.92.878,0.895,1.819,0.864,1.829,0.833	55.401	21.038	9.26	10.241	0.167	0.487	0.0658509	0.0306216	-1.10465	0	0
chrII:80887-oORF	chrII;80771;80896	oORF	Scer	N	NA	NA	NA	NA	116	NA	GGGUGAUGA	AUG	NA	NA	NA	NA	NA	YBL077W|chrII;80771;80896|80887,AAG	YBL077W|chrII;80771;80896|WT	802;255;0;0;0;0;0;1;0;294;0	1881;782;0;1;2;0;0;2;1;1155;0	689.899,227.976,0.000,0.000,0.000,0.000,0.000,0.777,0.000	1618.080,699.128,0.000.0.837,2.000,0.000,0.000,1.555,0.769	6.415	25.201	0	0	0	0	0.0262537	0.0309253	0.236268	0.0141668	0.0151895	296;764;0;1;1;0;0;1;1;478;50	3689;935;68;108;1;2;1;2;1;982;261	294.347,617.807,0.000,0.860,0.895,0.000,0.000,0.914,0.833	3668.401,756.086,68.000.92.878,0.895,1.819,0.864,1.829,0.833	10.24	21.038	1.962	10.241	0.192	0.487	0.0538073	0.0306216	-0.813251	2.91e-104	4.81e-104
chrII:89569-oORF	chrII;89720;89556	oORF	Scer	N	NA	NA	NA	NA	151	NA	UGUUCAUGG	AUG	NA	NA	NA	NA	NA	YBL071C-B|chrII;89720;89556|89569,AAG	YBL071C-B|chrII;89720;89556|WT	14823;447;219;2;139;11;8;7;5;6623;0	4302;481;2;1;3;2;7;2;3;3204;292	12751.092,399.629,199.856,1.674,139.000,8.210,6.009,5.442,3.845	3700.681,430.026,1.825.0.837,3.000,1.493,5.258,1.555,2.307	144.505	69.907	0	11.438	0	0.164	0.0212416	0.0189086	-0.167851	1.55e-06	1.76e-06	11551;3358;4;2;3;8;6;4;8;6610;201	6862;4;0;4;7;4;1;3;7;3526;64	11486.501,2715.439,4.000,1.720,2.686,7.277,5.184,3.657,6.662	6823.684,3.235,0.000.3.440,6.268,3.638,0.864,2.743,5.829	141.609	75.539	7.887	2.511	0.056	0.033	0.021785	0.0105434	-1.04699	5.17e-109	8.63e-109
chrII:89632-oORF	chrII;89720;89556	oORF	Scer	N	NA	NA	NA	NA	88	NA	CCUCCAUGU	AUG	NA	NA	NA	NA	NA	YBL071C-B|chrII;89720;89556|89632,AAG	YBL071C-B|chrII;89720;89556|WT	12929;475;2;4;4;9;10;1;9;4022;6	4302;481;2;1;3;2;7;2;3;3204;292	11121.829,424.662,1.825,3.349,4.000,6.717,7.512,0.777,6.920	3700.681,430.026,1.825.0.837,3.000,1.493,5.258,1.555,2.307	87.755	69.907	0.235	11.438	0.003	0.164	0.0130379	0.0189086	0.536334	4.3e-11	5.09e-11	8406;1990;4;4;4;1;3;5;1;4767;88	6862;4;0;4;7;4;1;3;7;3526;64	8359.063,1609.209,4.000,3.440,3.582,0.910,2.592,4.572,0.833	6823.684,3.235,0.000.3.440,6.268,3.638,0.864,2.743,5.829	102.126	75.539	3.453	2.511	0.034	0.033	0.0195264	0.0105434	-0.889082	1.13e-68	1.71e-68
chrII:90712-oORF	chrII;90668;90740	oORF	Scer	N	NA	NA	NA	NA	44	NA	CGACAUUGC	UUG	NA	NA	NA	NA	NA	YBL069W|chrII;90668;90740|90712,90740,AAG	YBL069W|chrII;90668;90740|WT	25;14;13;17;12;951;5168;9790;7489;8731;5519	34;21;16;27;295;7115;12295;7347;1904;9011;3688	21.506,12.516,11.864,14.232,12.000,709.782,3881.963,7610.573,5758.501	29.248,18.775,14.601.22.604,295.000,5310.303,9235.436,5711.428,1464.039	190.499	196.608	216.181	144.46	1.135	0.735	0.902483	0.822201	-0.134409	0	0	14;26;13;9;29;543;5590;10350;10000;8851;5337	86;286;9;6;27;3904;14754;7684;2866;8443;3706	13.922,21.025,13.000,7.740,25.967,493.900,4829.890,9463.404,8327.029	85.520,231.273,9.000.5.160,24.176,3550.983,12747.800,7025.778,2386.526	189.619	180.879	209.412	145.415	1.104	0.804	0.928904	0.850735	-0.12682	0	0
chrIII:103402-oORF	chrIII;103402;103358	oORF	Scer	N	NA	NA	NA	NA	0	NA	ND-too-cl	AUG	NA	NA	NA	NA	NA	YCL011C|chrIII;103402;103358|103402,AAG	YCL011C|chrIII;103402;103358|WT	0;0;1;52;281;362;1;0;1;435;1403	177;1589;17;0;0;2;3;1;2;519;482	0.000,0.000,0.913,43.533,281.000,270.180,0.751,0.000,0.769	152.260,1420.606,15.514.0.000,0.000,1.493,2.253,0.777,1.538	9.491	11.324	54.956	18.88	5.79	1.667	0.612472	0.0753537	-3.02289	4.44e-281	9.68e-281	0;3;3;193;401;326;143;0;0;374;1192	221;313;19;0;1;1;2;2;0;646;321	0.000,2.426,3.000,165.976,359.062,296.522,123.555,0.000,0.000	219.766,253.107,19.000.0.000,0.895,0.910,1.728,1.829,0.000	8.012	13.84	46.771	12.595	5.838	0.91	0.603408	0.0588889	-3.35707	1.19e-206	2.36e-206
chrIII:122357-122348	chrIII;122388;122328	uORF	Scer	Y	0.970667	0.936455	0.857	9	31	20	ACUUUUUGU	UUG	UUUUAA	1	MF	UAA	UAAUACUAGU	YCR005C|chrIII;122388;122328|122357,122348,AAG	YCR005C|chrIII;122388;122328|WT	1;2;0;1;2;257;479;518;774;593;1548	1;1;1;1;1;2;253;2;160;516;869	0.860,1.788,0.000,0.837,2.000,191.813,359.803,402.684,595.150	0.860,0.894,0.913.0.837,1.000,1.493,190.042,1.555,123.028	12.938	11.258	60.636	34.039	4.687	3.024	0.893752	0.885085	-0.0140595	0.0106	0.0114	1;1;0;0;1;0;2;582;888;398;1862	0;0;1;0;0;1;231;1929;1400;330;807	0.994,0.809,0.000,0.000,0.895,0.000,1.728,532.145,739.440	0.000,0.000,1.000.0.000,0.000,0.910,199.589,1763.759,1165.784	8.527	7.07	73.061	31.665	8.568	4.479	0.968105	0.94907	-0.0286488	1.33e-33	1.75e-33
chrIII:126810-126804	chrIII;126853;126730	uORF	Scer	N	0.00566667	0.004375	0.00133333	6	43	74	UGAAAAUGU	AUG	UAA	1	M	UAA	GUCUGUGUUC	YCR007C|chrIII;126853;126730|126810,AAG	YCR007C|chrIII;126853;126730|WT	163;15490;3018;11;72;13;18;17;10;10045;1322	7140;389;1;0;6;2;4;3;4;3546;358	140.216,13848.447,2754.180,9.209,72.000,9.703,13.521,13.215,7.689	6141.996,347.776,0.913.0.000,6.000,1.493,3.005,2.332,3.076	219.169	77.369	51.783	14.023	0.236	0.181	0.107732	0.014454	-2.8979	0	0	244;18076;2411;85;7;14;19;12;12;8283;1340	4864;1766;2;4;4;5;3;3;5;3112;115	242.638,14617.118,2411.000,73.098,6.268,12.734,16.416,10.972,9.992	4836.840,1428.072,2.000.3.440,3.582,4.548,2.592,2.743,4.164	177.451	66.67	52.579	4.512	0.296	0.068	0.0974478	0.0252233	-1.94987	0	0
chrIII:126840-126804	chrIII;126853;126730	uORF	Scer	N	0.00166667	0.0109211	0.00133333	36	13	74	AGUUUAUGA	AUG	AACUUCAAUAAAACUUCGAACCUGAAAAUGUAA	0.757129	MNFNKTSNLKM	UAA	GUCUGUGUUC	YCR007C|chrIII;126853;126730|126840,AAG	YCR007C|chrIII;126853;126730|WT	323;0;0;0;2;0;0;1;1;376;363	7140;389;1;0;6;2;4;3;4;3546;358	277.852,0.000,0.000,0.000,2.000,0.000,0.000,0.777,0.769	6141.996,347.776,0.913.0.000,6.000,1.493,3.005,2.332,3.076	8.204	77.369	14.219	14.023	1.733	0.181	0.0208421	0.014454	-0.528027	0.278	0.288	621;1;0;0;0;0;0;1;2;686;17	4864;1766;2;4;4;5;3;3;5;3112;115	617.532,0.809,0.000,0.000,0.000,0.000,0.000,0.914,1.665	4836.840,1428.072,2.000.3.440,3.582,4.548,2.592,2.743,4.164	14.697	66.67	0.667	4.512	0.045	0.068	0.0127086	0.0252233	0.988949	2.88e-20	3.55e-20
chrIII:152772-152817	chrIII;152710;152836	uORF	Scer	Y	0.000333333	0.008	0.000333333	45	62	19	UAUACAUGA	AUG	AAAACACUUCUCACAUUUGAUUUAAGAAGUUUACUGUUCUAA	0.733307	MKTLLTFDLRSLLF	UAA	GAAAAUAAAG	YCR019W|chrIII;152710;152836|152772,152817,AAG	YCR019W|chrIII;152710;152836|WT	3;3;1;0;977;4789;1319;0;753;1757;0	1;147;3008;1071;2;3;1;1;3;1095;0	2.581,2.682,0.913,0.000,977.000,3574.286,990.772,0.000,579.003	0.860,131.422,2745.054.896.617,2.000,2.239,0.751,0.777,2.307	38.335	23.891	0	0	0	0	0.731884	0.275449	-1.40983	0	0	6;6;2;376;287;1392;592;763;522;1525;853	1;22;2017;1;2;3;3;0;3;871;2	5.966,4.852,2.000,323.352,256.984,1266.129,511.502,697.640,434.671	0.994,17.790,2017.000.0.860,1.791,2.729,2.592,0.000,2.498	32.671	18.66	33.47	0.078	1.024	0.004	0.762504	0.239575	-1.67027	0	0
chrIII:154751-154712	chrIII;154755;154659	uORF	Scer	N	0.119333	0.0407317	0.00233333	39	4	53	ND-too-cl	AUG	AACUGGACUGAACUUAGAUAUUUUUUUCUGUAUUAA	0.840851	MNWTELRYFFLY	UAA	CUAAAAUUUA	YCR020C|chrIII;154755;154659|154751,AAG	YCR020C|chrIII;154755;154659|WT	8;5;2;2;3;5;5;4329;5458;1877;1007	6;6;7747;2199;332;4;9;4;4;4951;1189	6.882,4.470,1.825,1.674,3.000,3.732,3.756,3365.288,4196.808	5.161,5.364,7069.791.1840.952,332.000,2.985,6.760,3.110,3.076	40.954	108.024	39.444	46.573	0.963	0.431	0.948789	0.286249	-1.72882	0	0	5;5;2;1;1;178;3;14;3450;2068;1010	4;407;5363;1738;4;5;7;5;8;2994;2376	4.972,4.043,2.000,0.860,0.895,161.904,2.592,12.801,2872.825	3.978,329.120,5363.000.1494.642,3.582,4.548,6.048,4.572,6.662	44.304	64.142	39.63	93.229	0.895	1.453	0.979799	0.262225	-1.90168	0	0
chrIII:157152-157140	chrIII;157207;157107	uORF	Scer	Y	0.082	0.111357	0.083	12	55	33	CAAGUUUGA	UUG	AGACUUUAA	0.772344	MRL	UAA	UAUCUUUUGA	YCR021C|chrIII;157207;157107|157152,157140,AAG	YCR021C|chrIII;157207;157107|WT	2;3;2;0;0;5;2;1091;898;358;464	0;1;0;0;1;0;2;0;384;155;124	1.720,2.682,1.825,0.000,0.000,3.732,1.502,848.124,690.497	0.000,0.894,0.000.0.000,1.000,0.000,1.502,0.000,295.268	7.811	3.382	18.175	4.857	2.327	1.436	0.934779	0.992821	0.0869076	5.35e-48	7.67e-48	3;0;1;0;2;0;1;2;1881;483;997	0;0;0;0;0;0;1;1;226;246;259	2.983,0.000,1.000,0.000,1.791,0.000,0.864,1.829,1566.314	0.000,0.000,0.000.0.000,0.000,0.000,0.864,0.914,188.191	10.348	5.27	39.12	10.163	3.78	1.928	0.996382	0.998795	0.00349031	0.926	0.93
chrIII:160396-160378	chrIII;160435;160373	uORF	Scer	N	0.0733333	0.4116	0.892667	18	39	5	AGCAUAUGA	AUG	AACACACGAAUAUAA	0.559035	MNTRI	UAA	AAGATATGAG	YCR023C|chrIII;160435;160373|160396,AAG	YCR023C|chrIII;160435;160373|WT	1;4;113;1045;557;1;0;6;1;707;1334	2;962;2651;3;1;115;2;4;2;2159;967	0.860,3.576,103.122,874.850,557.000,0.746,0.000,4.664,0.769	1.720,860.052,2419.261.2.512,1.000,85.831,1.502,3.110,1.538	15.426	47.107	52.253	37.878	3.387	0.804	0.439321	0.216187	-1.023	0	0	7;1;1;507;1164;2;3;0;1;810;940	7;1255;2930;569;6;4;6;0;5;1558;1617	6.961,0.809,1.000,436.009,1042.264,1.819,2.592,0.000,0.833	6.961,1014.853,2930.000.489.328,5.372,3.638,5.184,0.000,4.164	17.353	33.378	36.884	63.447	2.126	1.901	0.49678	0.218019	-1.18815	0	0
chrIII:160429-160378	chrIII;160435;160373	uORF	Scer	Y	0.031	0.160283	0.892667	51	6	5	AAGGAAUGC	AUG	CUAGCAAAGGAACUAGGAAGUGGUAAGCAUAUGAACACACGAAUAUAA	0.673499	MLAKELGSGKHMNTRI	UAA	AAGATATGAG	YCR023C|chrIII;160435;160373|160429,160378,AAG	YCR023C|chrIII;160435;160373|WT	7;4;363;3270;2609;216;5;2;108;2173;3358	2;962;2651;3;1;115;2;4;2;2159;967	6.022,3.576,331.268,2737.569,2609.000,161.212,3.756,1.555,83.044	1.720,860.052,2419.261.2.512,1.000,85.831,1.502,3.110,1.538	47.412	47.107	131.534	37.878	2.774	0.804	0.469704	0.216187	-1.11947	0	0	8;4;367;2982;2616;238;4;3;2;2527;2333	7;1255;2930;569;6;4;6;0;5;1558;1617	7.955,3.235,367.000,2564.455,2342.408,216.479,3.456,2.743,1.665	6.961,1014.853,2930.000.489.328,5.372,3.638,5.184,0.000,4.164	54.137	33.378	91.542	63.447	1.691	1.901	0.455134	0.218019	-1.06184	0	0
chrIII:163114-oORF	chrIII;163218;163067	oORF	Scer	N	NA	NA	NA	NA	104	NA	AUCCUUUGU	UUG	NA	NA	NA	NA	NA	YCR024C-A|chrIII;163218;163067|163114,163067,AAG	YCR024C-A|chrIII;163218;163067|WT	2;1;1;0;0;1;1699;1606;670;622;0	4;3;1;4;4;327;791;1072;5138;1916;301	1.720,0.894,0.913,0.000,0.000,0.746,1276.210,1248.476,515.182	3.441,2.682,0.913.3.349,4.000,244.058,594.163,833.354,3950.751	13.571	41.805	0	11.79	0	0.282	0.88251	0.95117	0.10809	0	0	3;2;1;1;1;1;1223;385;281;261;0	5;4;0;2;3;225;789;5094;4894;1566;152	2.983,1.617,1.000,0.860,0.895,0.910,1056.701,352.020,233.990	4.972,3.235,0.000.1.720,2.686,204.655,681.714,4657.641,4075.248	5.592	33.549	0	5.964	0	0.178	0.878649	0.946815	0.107795	3.1e-290	6.85e-290
chrIII:163131-163077	chrIII;163218;163067	uORF	Scer	Y	0.980333	0.770232	0.913333	54	87	10	AACUUUUGU	UUG	UUCCUACAUAUCCUUUGUUUGUUUCUCCUCUUCCCAUUUCAGCACUUUUAA	0.651169	MFLHILCLFLLFPFQHF	UAA	TCTATCATAA	YCR024C-A|chrIII;163218;163067|163131,163077,AAG	YCR024C-A|chrIII;163218;163067|WT	5;3;1;2;0;4;3;3984;1445;2031;173	4;3;1;4;4;327;791;1072;5138;1916;301	4.301,2.682,0.913,1.674,0.000,2.985,2.253,3097.091,1111.101	3.441,2.682,0.913.3.349,4.000,244.058,594.163,833.354,3950.751	44.314	41.805	6.776	11.79	0.153	0.282	0.916636	0.95117	0.0533546	1.71e-170	3.23e-170	4;2;1;3;2;2;267;2391;2014;1414;120	5;4;0;2;3;225;789;5094;4894;1566;152	3.978,1.617,1.000,2.580,1.791,1.819,230.694,2186.184,1677.064	4.972,3.235,0.000.1.720,2.686,204.655,681.714,4657.641,4075.248	30.293	33.549	4.709	5.964	0.155	0.178	0.950479	0.946815	-0.00557258	0.521	0.531
chrIII:163208-163184	chrIII;163218;163067	uORF	Scer	Y	1	0.981269	0.877667	24	10	117	ACACUUUGA	UUG	AAGGAAGAGCAAAUAAGUUAA	0.735057	MKEEQIS	UAA	CUUUUUCAUC	YCR024C-A|chrIII;163218;163067|163208,163184,AAG	YCR024C-A|chrIII;163218;163067|WT	11;9;4;3;2;1582;6622;5010;4131;1871;0	4;3;1;4;4;327;791;1072;5138;1916;301	9.462,8.046,3.650,2.512,2.000,1180.731,4974.141,3894.686,3176.441	3.441,2.682,0.913.3.349,4.000,244.058,594.163,833.354,3950.751	40.823	41.805	0	11.79	0	0.282	0.876515	0.95117	0.117924	0	0	7;2;5;4;4;996;3208;3204;2930;1902;449	5;4;0;2;3;225;789;5094;4894;1566;152	6.961,1.617,5.000,3.440,3.582,905.937,2771.787,2929.541,2439.819	4.972,3.235,0.000.1.720,2.686,204.655,681.714,4657.641,4075.248	40.748	33.549	17.618	5.964	0.432	0.178	0.897146	0.946815	0.0777405	0	0
chrIII:163942-163933	chrIII;164006;163856	uORF	Scer	N	0.99	0.993818	1	9	64	77	AUAAGAUGU	AUG	UACUAA	0.875662	MY	UAA	GUAAGAAAAC	YCR025C|chrIII;164006;163856|163942,AAG	YCR025C|chrIII;164006;163856|WT	1121;1472;0;0;0;0;0;0;0;500;0	3708;287;1;1;3;3;3;2;0;1748;417	964.311,1316.005,0.000,0.000,0.000,0.000,0.000,0.000,0.000	3189.709,256.585,0.913.0.837,3.000,2.239,2.253,1.555,0.000	10.909	38.139	0	16.334	0	0.428	0.0476017	0.016146	-1.55984	3.96e-223	8.05e-223	359;390;0;1;2;1;1;0;2;551;64	3493;318;1;3;3;1;1;0;3;1665;151	356.995,315.373,0.000,0.860,1.791,0.910,0.864,0.000,1.665	3473.496,257.150,1.000.2.580,2.686,0.910,0.864,0.000,2.498	11.804	35.67	2.511	5.925	0.213	0.166	0.0447479	0.0143684	-1.63892	1.52e-62	2.26e-62
chrIII:163962-163929	chrIII;164006;163856	uORF	Scer	N	0.0216667	0.624514	1	33	44	73	AUCCGAUGA	AUG	ACAGUGGGGUCAAUAAGAUGUACUAAGUAA	0.729104	MTVGSIRCTK	UAA	GAAAACUAAU	YCR025C|chrIII;164006;163856|163962,AAG	YCR025C|chrIII;164006;163856|WT	2359;571;2;1;1;2;6;2;1;1481;0	3708;287;1;1;3;3;3;2;0;1748;417	2029.267,510.488,1.825,0.837,1.000,1.493,4.507,1.555,0.769	3189.709,256.585,0.913.0.837,3.000,2.239,2.253,1.555,0.000	32.314	38.139	0	16.334	0	0.428	0.0260238	0.016146	-0.688656	3.13e-17	3.87e-17	2920;1156;148;1;2;2;2;3;2;1792;68	3493;318;1;3;3;1;1;0;3;1665;151	2903.695,934.797,148.000,0.860,1.791,1.819,1.728,2.743,1.665	3473.496,257.150,1.000.2.580,2.686,0.910,0.864,0.000,2.498	38.391	35.67	2.668	5.925	0.069	0.166	0.0336667	0.0143684	-1.22843	3.48e-54	5.02e-54
chrIII:176457-oORF	chrIII;176523;176438	oORF	Scer	Y	NA	NA	NA	NA	66	NA	GAAAAUUGC	UUG	NA	NA	NA	NA	NA	YCR030C|chrIII;176523;176438|176457,176406,AAG	YCR030C|chrIII;176523;176438|WT	8;6;5;4;139;2431;4845;2682;897;2585;0	40;18;17;9;183;4459;10849;6692;4618;10075;0	6.882,5.364,4.563,3.349,139.000,1814.385,3639.340,2084.939,689.728	34.409,16.092,15.514.7.535,183.000,3327.989,8149.268,5202.243,3550.909	56.401	219.823	0	0	0	0	0.827074	0.850503	0.0403007	1.15e-74	1.8e-74	14;7;4;4;235;3773;3167;1711;2245;2872;98	18;20;10;8;96;6082;11578;6571;1255;10229;85	13.922,5.661,4.000,3.440,210.423,3431.829,2736.362,1564.433,1869.418	17.899,16.173,10.000.6.880,85.960,5532.039,10003.662,6008.119,1045.042	61.528	219.141	3.845	3.335	0.062	0.015	0.829821	0.836031	0.0107553	0.0142254	0.0150431
chrIII:179395-179401	chrIII;179390;179519	uORF	Scer	N	0.06	0.0253333	0.0156667	6	5	118	ND-too-cl	AUG	UGA	1	M	UGA	UUACUGAUUC	YCR032W|chrIII;179390;179519|179395,AAG	YCR032W|chrIII;179390;179519|WT	2;0;0;0;1226;1030;2;1;0;943;0	875;487;1;0;3;2;0;0;1;561;0	1.720,0.000,0.000,0.000,1226.000,768.744,1.502,0.777,0.000	752.696,435.390,0.913.0.000,3.000,1.493,0.000,0.000,0.769	20.575	12.24	0	0	0	0	0.612634	0.0371834	-4.0423	0	0	2;1;0;973;1033;880;1;0;3;518;0	109;1983;0;0;1;0;0;0;0;429;0	1.989,0.809,0.000,836.759,924.964,800.427,0.864,0.000,2.498	108.391,1603.549,0.000.0.000,0.895,0.000,0.000,0.000,0.000	11.097	9.191	0	0	0	0	0.542848	0.0676687	-3.00399	0	0
chrIII:228535-228517	chrIII;228630;228505	uORF	Scer	N	1	0.99995	1	18	95	12	UGGAGAUGG	AUG	GCCUUUCUCUUGUAG	0.658403	MAFLL	UAG	UACAGAGUAU	YCR064C|chrIII;228630;228505|228535,AAG	YCR064C|chrIII;228630;228505|WT	1077;10062;103;3;4;4;13;9;5;5217;873	6169;797;165;2;3;5;2;5;7;4135;969	926.461,8995.679,93.996,2.512,4.000,2.985,9.765,6.996,3.845	5306.719,712.538,150.576.1.674,3.000,3.732,1.502,3.887,5.382	113.828	90.22	34.196	37.956	0.3	0.421	0.073807	0.0247888	-1.57407	0	0	190;9112;289;4;1;5;13;8;15;4130;800	3290;4187;4;4;3;5;3;4;83;4353;265	188.939,7368.399,289.000,3.440,0.895,4.548,11.232,7.315,12.491	3271.629,3385.808,4.000.3.440,2.686,4.548,2.592,3.657,69.114	88.479	93.257	31.39	10.398	0.355	0.111	0.080222	0.0521256	-0.622004	0	0
chrIII:239004-239025	chrIII;238930;239054	uORF	Scer	Y	0.000666667	0.012619	0.009	21	74	29	GUAGAUUGG	UUG	GAAGACCGAAGAAAAUAG	0.655051	MEDRRK	UAG	AUAGACUUUC	YCR069W|chrIII;238930;239054|239004,239025,AAG	YCR069W|chrIII;238930;239054|WT	50;30;188;17;133;275;8037;12121;18533;14716;277	14;18;95;15;123;256;6042;10185;12907;9279;455	43.011,26.821,171.566,14.232,133.000,205.247,6037.023,9422.651,14250.540	12.043,16.092,86.696.12.558,123.000,191.066,4538.471,7917.639,9924.552	321.084	202.456	10.85	17.822	0.034	0.088	0.921197	0.918749	-0.00383998	7.12e-08	8.19e-08	32;34;14;13;905;2297;15881;17131;21275;14381;442	21;22;4;80;163;1388;6235;10845;11573;9516;319	31.821,27.494,14.000,11.180,810.351,2089.295,13721.554,15663.534,17715.754	20.883,17.790,4.000.68.798,145.953,1262.491,5387.185,9916.002,9636.870	308.091	203.866	17.343	12.517	0.056	0.061	0.913073	0.921229	0.0128294	8.78e-31	1.14e-30
chrIII:246633-246606	chrIII;246642;246583	uORF	Scer	N	0.008	0.00444828	0.00533333	27	9	23	AGCUAAUGU	AUG	UUGUUUUACUUAGGGUGGCUAUAA	0.753808	MLFYLGWL	UAA	AAGGUAGUUC	YCR073C|chrIII;246642;246583|246633,AAG	YCR073C|chrIII;246642;246583|WT	7;1;1;3;2;5;2145;1939;1225;1518;11	4;191;4267;384;23;2;4;2;3;2251;604	6.022,0.894,0.913,2.512,2.000,3.732,1611.225,1507.344,941.937	3.441,170.759,3893.998.321.476,23.000,1.493,3.005,1.555,2.307	33.121	49.114	0.431	23.659	0.013	0.482	0.889168	0.252677	-1.81516	0	0	1;7;1;5;2;324;807;2411;2594;1475;247	3;923;3647;596;34;5;4;1;3;2284;513	0.994,5.661,1.000,4.300,1.791,294.702,697.267,2204.470,2160.031	2.983,746.382,3647.000.512.547,30.444,4.548,3.456,0.914,2.498	31.6	48.931	9.692	20.129	0.307	0.411	0.931719	0.231117	-2.01127	0	0
chrIII:289499-289592	chrIII;289477;289638	uORF	Scer	N	0	0.00176344	0	93	22	46	AAAAUAUGG	AUG	GGGCUAAAGAACUGUAUAUUUAUGGAUAGCACUAAAAGUAAAGAUUUUCCCCGUGUCCUGACUUGGAGAAACAAAAUUUCAUUGUCAUAA	0.7394	MGLKNCIFMDSTKSKDFPRVLTWRNKISLS	UAA	AAAACUUUUA	YCR095W-A|chrIII;289477;289638|289499,AAG	YCR095W-A|chrIII;289477;289638|WT	69;0;0;0;0;0;0;1;0;212;0	447;0;1;0;0;1;1;0;0;465;258	59.355,0.000,0.000,0.000,0.000,0.000,0.000,0.777,0.000	384.520,0.000,0.913.0.000,0.000,0.746,0.751,0.000,0.000	4.626	10.146	0	10.106	0	0.996	0.022923	0.0130176	-0.816329	0.91252	0.919529	149;0;0;0;0;0;0;0;0;305;10	836;0;0;0;0;1;0;0;0;268;114	148.168,0.000,0.000,0.000,0.000,0.000,0.000,0.000,0.000	831.332,0.000,0.000.0.000,0.000,0.910,0.000,0.000,0.000	6.534	5.742	0.392	4.473	0.06	0.779	0.00793651	0.00877494	0.144885	0.98148	0.981899
chrIII:289523-289592	chrIII;289477;289638	uORF	Scer	N	0.000666667	0.00201449	0	69	46	46	UAUUUAUGG	AUG	GAUAGCACUAAAAGUAAAGAUUUUCCCCGUGUCCUGACUUGGAGAAACAAAAUUUCAUUGUCAUAA	0.766691	MDSTKSKDFPRVLTWRNKISLS	UAA	AAAACUUUUA	YCR095W-A|chrIII;289477;289638|289523,AAG	YCR095W-A|chrIII;289477;289638|WT	2873;0;0;1;0;0;2;1;0;990;0	447;0;1;0;0;1;1;0;0;465;258	2471.422,0.000,0.000,0.837,0.000,0.000,1.502,0.777,0.000	384.520,0.000,0.913.0.000,0.000,0.746,0.751,0.000,0.000	21.601	10.146	0	10.106	0	0.996	0.00964856	0.0130176	0.432084	0.846	0.857	542;256;0;2;0;1;2;1;1;665;0	836;0;0;0;0;1;0;0;0;268;114	538.974,207.014,0.000,1.720,0.000,0.910,1.728,0.914,0.833	831.332,0.000,0.000.0.000,0.000,0.910,0.000,0.000,0.000	14.247	5.742	0	4.473	0	0.779	0.0321144	0.00877494	-1.87176	1.52e-22	1.9e-22
chrIII:289605-289623	chrIII;289477;289638	uORF	Scer	Y	0.00233333	0.119111	0.131667	18	128	15	AAAAUAUGA	AUG	AUAUUCAAAGCUUGA	0.839128	MIFKA	UGA	GCAUUGGGCU	YCR095W-A|chrIII;289477;289638|289605,289623,AAG	YCR095W-A|chrIII;289477;289638|WT	283;1;0;0;0;2;0;0;0;268;0	447;0;1;0;0;1;1;0;0;465;258	243.443,0.894,0.000,0.000,0.000,1.493,0.000,0.000,0.000	384.520,0.000,0.913.0.000,0.000,0.746,0.751,0.000,0.000	5.847	10.146	0	10.106	0	0.996	0.0144445	0.0130176	-0.150054	0.926	0.932	926;96;0;0;0;1;0;0;0;316;0	836;0;0;0;0;1;0;0;0;268;114	920.829,77.630,0.000,0.000,0.000,0.910,0.000,0.000,0.000	831.332,0.000,0.000.0.000,0.000,0.910,0.000,0.000,0.000	6.77	5.742	0	4.473	0	0.779	0.0135873	0.00877494	-0.630798	0.00413	0.0044
chrIII:293606-oORF	chrIII;293680;293538	oORF	Scer	Y	NA	NA	NA	NA	74	NA	UAGUGAUGA	AUG	NA	NA	NA	NA	NA	YCR096C|chrIII;293680;293538|293606,293525,AAG	YCR096C|chrIII;293680;293538|WT	7;1318;6490;59;5;6;2;2;4;3348;3857	5040;2692;215;4;1;4;3;1;3;2639;0	6.022,1178.325,5922.673,49.393,5.000,4.478,1.502,1.555,3.076	4335.526,2406.715,196.206.3.349,1.000,2.985,2.253,0.777,2.307	73.049	57.58	151.08	0	2.068	0	0.220038	0.0402421	-2.45098	0	0	4;1681;3718;803;4;2;1;1;3;2374;2395	5961;2147;2;166;1;2;2;2;8;1751;519	3.978,1359.337,3718.000,690.562,3.582,1.819,0.864,0.914,2.498	5927.715,1736.167,2.000.142.756,0.895,1.819,1.728,1.829,6.662	50.859	37.513	93.974	20.364	1.848	0.543	0.216813	0.0305188	-2.82868	0	0
chrIII:302238-oORF	chrIII;302376;302221	oORF	Scer	N	NA	NA	NA	NA	138	NA	GCAAGAUGA	AUG	NA	NA	NA	NA	NA	YCR100C|chrIII;302376;302221|302238,AAG	YCR100C|chrIII;302376;302221|WT	4240;676;0;0;0;1;1;0;2;2363;0	6595;660;0;1;3;5;0;3;3;2908;35	3647.348,604.361,0.000,0.000,0.000,0.746,0.751,0.000,1.538	5673.174,590.056,0.000.0.837,3.000,3.732,0.000,2.332,2.307	51.558	63.449	0	1.371	0	0.022	0.0189339	0.0166037	-0.189469	5.34e-05	5.96e-05	1230;918;1;1;0;0;1;0;3;2566;282	11306;1157;0;46;2;4;1;1;1;3745;85	1223.132,742.339,1.000,0.860,0.000,0.000,0.864,0.000,2.498	11242.869,935.606,0.000.39.559,1.791,3.638,0.864,0.914,0.833	54.973	80.231	11.065	3.335	0.201	0.042	0.0341865	0.0145581	-1.23161	1.43e-100	2.34e-100
chrIII:302259-302244	chrIII;302376;302221	uORF	Scer	N	0.290333	0.535882	0.830667	15	117	23	GUCAUAUGU	AUG	UGGUCGUUUUAA	0.781537	MWSF	UAA	CGCAAGAUGA	YCR100C|chrIII;302376;302221|302259,AAG	YCR100C|chrIII;302376;302221|WT	6664;3;3;4;2;5;6;2;1;2764;158	6595;660;0;1;3;5;0;3;3;2908;35	5732.529,2.682,2.738,3.349,2.000,3.732,4.507,1.555,0.769	5673.174,590.056,0.000.0.837,3.000,3.732,0.000,2.332,2.307	60.307	63.449	6.189	1.371	0.103	0.022	0.0108618	0.0166037	0.612238	2.93e-18	3.65e-18	6245;1819;2;1;1;1;7;3;4;2400;282	11306;1157;0;46;2;4;1;1;1;3745;85	6210.129,1470.930,2.000,0.860,0.895,0.910,6.048,2.743,3.331	11242.869,935.606,0.000.39.559,1.791,3.638,0.864,0.914,0.833	51.416	80.231	11.065	3.335	0.215	0.042	0.0219928	0.0145581	-0.595217	6.8e-41	9.25e-41
chrIII:302307-302265	chrIII;302376;302221	uORF	Scer	N	0.121	0.0738409	0.138333	42	69	44	UUUUGAUGA	AUG	AAUUUAAAGAUAAGAUUGUUACUCAAUACAAGAUAUUGA	0.823027	MNLKIRLLLNTRY	UGA	AGUCAUAUGU	YCR100C|chrIII;302376;302221|302307,AAG	YCR100C|chrIII;302376;302221|WT	8312;497;3;1;1;2;1;4;1;3009;520	6595;660;0;1;3;5;0;3;3;2908;35	7150.177,444.330,2.738,0.837,1.000,1.493,0.751,3.110,0.769	5673.174,590.056,0.000.0.837,3.000,3.732,0.000,2.332,2.307	65.652	63.449	20.369	1.371	0.31	0.022	0.0136117	0.0166037	0.286661	0.0002402	0.000266119	3515;629;0;0;1;6;6;1;0;2821;231	11306;1157;0;46;2;4;1;1;1;3745;85	3495.373,508.639,0.000,0.000,0.895,5.457,5.184,0.914,0.000	11242.869,935.606,0.000.39.559,1.791,3.638,0.864,0.914,0.833	60.436	80.231	9.064	3.335	0.15	0.042	0.0186278	0.0145581	-0.355639	2.59e-06	2.86e-06
chrIII:302334-302265	chrIII;302376;302221	uORF	Scer	N	0.872667	0.268338	0.138333	69	42	44	UAGUGAUGG	AUG	GAGGCAAAACGUUUAAAGAUUUUGAUGAAUUUAAAGAUAAGAUUGUUACUCAAUACAAGAUAUUGA	0.790639	MEAKRLKILMNLKIRLLLNTRY	UGA	AGUCAUAUGU	YCR100C|chrIII;302376;302221|302334,AAG	YCR100C|chrIII;302376;302221|WT	11233;1613;1;153;4;4;3;1;3;4000;245	6595;660;0;1;3;5;0;3;3;2908;35	9662.890,1442.062,0.913,128.088,4.000,2.985,2.253,0.777,2.307	5673.174,590.056,0.000.0.837,3.000,3.732,0.000,2.332,2.307	87.275	63.449	9.597	1.371	0.11	0.022	0.0225539	0.0166037	-0.441875	5.56e-07	6.35e-07	6114;1359;0;1;3;4;7;1;4;3764;68	11306;1157;0;46;2;4;1;1;1;3745;85	6079.861,1098.952,0.000,0.860,2.686,3.638,6.048,0.914,3.331	11242.869,935.606,0.000.39.559,1.791,3.638,0.864,0.914,0.833	80.638	80.231	2.668	3.335	0.033	0.042	0.0197834	0.0145581	-0.442472	3.77e-18	4.6e-18
chrIII:30902-30908	chrIII;30874;30909	uORF	Scer	N	0.0203333	0.007	0.00366667	6	28	2	ACAGCAUGU	AUG	UAG	1	M	UAG	CTATGAGATC	YCL054W-A|chrIII;30874;30909|30902,AAG	YCL054W-A|chrIII;30874;30909|WT	35;210;0;1;0;0;0;0;0;170;71	279;134;0;1;0;2;0;0;2;213;38	30.108,187.745,0.000,0.837,0.000,0.000,0.000,0.000,0.000	240.002,119.799,0.000.0.837,0.000,1.493,0.000,0.000,1.538	3.709	4.647	2.781	1.488	0.75	0.32	0.0681433	0.0410068	-0.73271	7.71e-25	9.93e-25	16;166;10;15;0;0;1;0;1;234;95	194;7;0;0;0;1;2;0;0;204;119	15.911,134.236,10.000,12.900,0.000,0.000,0.864,0.000,0.833	192.917,5.661,0.000.0.000,0.000,0.910,1.728,0.000,0.000	5.013	4.37	3.728	4.669	0.744	1.068	0.108376	0.0215307	-2.33158	6.51e-47	9.12e-47
chrIII:310932-oORF	chrIII;310927;310957	oORF	Scer	N	NA	NA	NA	NA	5	NA	ND-too-cl	AUG	NA	NA	NA	NA	NA	YCR106W|chrIII;310927;310957|310932,AAG	YCR106W|chrIII;310927;310957|WT	35;212;0;0;0;0;1;0;0;74;38	385;132;0;1;5;0;0;0;0;215;1	30.108,189.533,0.000,0.000,0.000,0.000,0.751,0.000,0.000	331.186,118.011,0.000.0.837,5.000,0.000,0.000,0.000,0.000	1.615	4.691	1.488	0.039	0.921	0.008	0.0702016	0.0340278	-1.04479	6.86e-34	9.29e-34	7;289;0;0;0;1;0;0;0;67;67	319;133;5;0;0;0;0;0;0;231;71	6.961,233.699,0.000,0.000,0.000,0.910,0.000,0.000,0.000	317.219,107.550,5.000.0.000,0.000,0.000,0.000,0.000,0.000	1.435	4.949	2.629	2.786	1.832	0.563	0.0722157	0.0270062	-1.41902	1.03e-50	1.46e-50
chrIII:310950-oORF	chrIII;310927;310957	oORF	Scer	N	NA	NA	NA	NA	23	NA	CUGAAAUGC	AUG	NA	NA	NA	NA	NA	YCR106W|chrIII;310927;310957|310950,AAG	YCR106W|chrIII;310927;310957|WT	62;78;0;0;5;1;0;1;0;92;64	385;132;0;1;5;0;0;0;0;215;1	53.334,69.734,0.000,0.000,5.000,0.746,0.000,0.777,0.000	331.186,118.011,0.000.0.837,5.000,0.000,0.000,0.000,0.000	2.007	4.691	2.507	0.039	1.249	0.008	0.0810863	0.0340278	-1.25274	1.41e-08	1.64e-08	113;114;0;0;2;0;0;0;0;160;40	319;133;5;0;0;0;0;0;0;231;71	112.369,92.186,0.000,0.000,1.791,0.000,0.000,0.000,0.000	317.219,107.550,5.000.0.000,0.000,0.000,0.000,0.000,0.000	3.428	4.949	1.57	2.786	0.458	0.563	0.041514	0.0270062	-0.62031	0.000105	0.000114
chrIII:313823-313835	chrIII;313775;313889	uORF	Scer	N	0.021	0.0108333	0.00533333	12	48	54	UUUCGAUGA	AUG	AUGACUUGA	1	MMT	UGA	AAAAAUUCAA	YCR107W|chrIII;313775;313889|313823,AAG	YCR107W|chrIII;313775;313889|WT	23472;2519;4;361;4;12;21;10;8;9039;47	12563;2677;510;8;9;11;14;11;19;8298;0	20191.165,2252.049,3.650,302.221,4.000,8.956,15.774,7.774,6.151	10806.987,2393.305,465.418.6.697,9.000,8.210,10.516,8.551,14.610	197.219	181.052	1.841	0	0.009	0	0.0218725	0.0317229	0.536406	6.85e-57	1.01e-56	10007;1154;4;153;245;10;26;5;7;9832;109	14253;5084;108;7;8;14;13;16;9;8831;96	9951.123,933.180,4.000,131.577,219.377,9.096,22.465,4.572,5.829	14173.414,4111.165,108.000.6.020,7.163,12.734,11.232,14.629,7.494	210.636	189.191	4.277	3.767	0.02	0.02	0.0314261	0.0260273	-0.271935	8.29e-54	1.19e-53
chrIII:313826-313835	chrIII;313775;313889	uORF	Scer	N	0.0213333	0.00666667	0.00533333	9	51	54	CGAUGAUGA	AUG	ACUUGA	1	MT	UGA	AAAAAUUCAA	YCR107W|chrIII;313775;313889|313826,AAG	YCR107W|chrIII;313775;313889|WT	3266;11040;343;79;6;9;17;9;14;7303;0	12563;2677;510;8;9;11;14;11;19;8298;0	2809.490,9870.036,313.016,66.137,6.000,6.717,12.770,6.996,10.765	10806.987,2393.305,465.418.6.697,9.000,8.210,10.516,8.551,14.610	159.342	181.052	0	0	0	0	0.0699503	0.0317229	-1.14081	0	0	5069;5533;8;10;8;447;14;9;10;7280;361	14253;5084;108;7;8;14;13;16;9;8831;96	5040.696,4474.248,8.000,8.600,7.163,406.580,12.096,8.229,8.327	14173.414,4111.165,108.000.6.020,7.163,12.734,11.232,14.629,7.494	155.963	189.191	14.165	3.767	0.091	0.02	0.0686754	0.0260273	-1.39977	0	0
chrIII:58989-oORF	chrIII;58987;59025	oORF	Scer	N	NA	NA	NA	NA	2	NA	ND-too-cl	AUG	NA	NA	NA	NA	NA	YCL036W|chrIII;58987;59025|58989,AAG	YCL036W|chrIII;58987;59025|WT	18;383;511;1;14;2;1;0;0;454;868	493;279;16;0;0;1;1;0;0;322;110	15.484,342.412,466.331,0.837,14.000,1.493,0.751,0.000,0.000	424.090,249.433,14.601.0.000,0.000,0.746,0.751,0.000,0.000	9.906	7.026	34	4.309	3.432	0.613	0.179852	0.0403155	-2.1574	1.47e-157	2.71e-157	0;302;571;46;0;1;1;0;2;314;702	489;195;0;0;0;0;2;1;0;381;198	0.000,244.212,571.000,39.559,0.000,0.910,0.864,0.000,1.665	486.270,157.686,0.000.0.000,0.000,0.000,1.728,0.914,0.000	6.727	8.162	27.545	7.769	4.095	0.952	0.200321	0.0274103	-2.86952	1.18e-206	2.35e-206
chrIII:69937-oORF	chrIII;70004;69921	oORF	Scer	N	NA	NA	NA	NA	67	NA	UGUGUAUGC	AUG	NA	NA	NA	NA	NA	YCL029C|chrIII;70004;69921|69937,AAG	YCL029C|chrIII;70004;69921|WT	45;419;18576;21547;2362;350;41;29;24;20392;22435	46;593;24452;15809;2920;35;39;31;30;19968;19914	38.710,374.596,16952.167,18038.653,2362.000,261.224,30.797,22.544,18.454	39.570,530.157,22314.513.13234.931,2920.000,26.122,29.295,24.099,23.068	444.927	435.676	878.784	780.036	1.975	1.79	0.335421	0.316334	-0.0845229	3.06e-174	5.8e-174	48;82;13435;19503;4255;277;35;35;32;20989;19882	46;1179;32572;11271;1010;741;46;17;20;24401;19159	47.732,66.309,13435.000,16772.154,3809.994,251.952,30.241,32.002,26.646	45.743,953.396,32572.000.9692.814,904.370,673.996,39.745,15.544,16.654	449.658	522.755	780.125	751.756	1.735	1.438	0.346378	0.279481	-0.309596	0	0
chrIV:101078-oORF	chrIV;101093;101067	oORF	Scer	N	NA	NA	NA	NA	15	NA	UCUAAAUGG	AUG	NA	NA	NA	NA	NA	YDL200C|chrIV;101093;101067|101078,AAG	YDL200C|chrIV;101093;101067|WT	0;0;0;0;0;74;9;102;130;60;0	1;194;248;16;0;0;1;0;1;275;0	0.000,0.000,0.000,0.000,0.000,55.230,6.760,79.293,99.961	0.860,173.441,226.321.13.395,0.000,0.000,0.751,0.000,0.769	1.309	6	0	0	0	0	0.892446	0.18267	-2.28853	4.08e-101	6.76e-101	0;0;0;0;0;27;35;0;21;63;0	22;217;230;33;14;4;0;0;0;344;0	0.000,0.000,0.000,0.000,0.000,24.559,30.241,0.000,17.487	21.877,175.477,230.000.28.379,12.536,3.638,0.000,0.000,0.000	1.35	7.37	0	0	0	0	0.834299	0.186817	-2.15894	2.32e-43	3.19e-43
chrIV:1013673-1013664	chrIV;1013718;1013643	uORF	Scer	Y	0.127333	0.0940909	0.0503333	9	45	21	ACAUUUUGA	UUG	AACUAA	0.823318	MN	UAA	ACAGCACAGC	YDR276C|chrIV;1013718;1013643|1013673,1013664,AAG	YDR276C|chrIV;1013718;1013643|WT	21;23;17;14;18;41;3563;8596;14501;8933;5813	20;14;9;10;196;23;4395;5966;11244;6627;5566	18.065,20.563,15.514,11.720,18.000,30.600,2676.361,6682.379,11150.223	17.204,12.516,8.213.8.372,196.000,17.166,3301.321,4637.863,8645.825	194.907	144.593	227.697	218.022	1.168	1.508	0.938674	0.928402	-0.0158758	2.77e-23	3.54e-23	23;30;3;12;19;20;9163;12092;11805;10938;6288	22;15;8;21;19;726;4771;7785;10588;5883;5641	22.872,24.259,3.000,10.320,17.013,18.192,7917.046,11056.182,9830.057	21.877,12.130,8.000.18.060,17.013,660.352,4122.255,7118.126,8816.658	234.33	126.034	246.727	221.34	1.053	1.756	0.92679	0.931844	0.00784722	9.54e-53	1.37e-52
chrIV:1015860-1015791	chrIV;1015860;1015702	uORF	Scer	N	0.0556667	0.0989437	0.546	69	0	89	ND-too-cl	AUG	GAGUUUUUUAAUAACUUAAGGAAACAUACAAAAAGAUUUGUUCAUUUCACUCCAAGUAUUUUUUAA	0.87232	MEFFNNLRKHTKRFVHFTPSIF	UAA	CGUAUAUUGA	YDR277C|chrIV;1015860;1015702|1015860,AAG	YDR277C|chrIV;1015860;1015702|WT	2;1;2;134;0;3;3;1782;2635;1812;2065	1;990;2710;0;3;1;1;0;1;1120;260	1.720,0.894,1.825,112.182,0.000,2.239,2.253,1385.295,2026.125	0.860,885.085,2473.104.0.000,3.000,0.746,0.751,0.000,0.769	39.535	24.437	80.887	10.184	2.046	0.417	0.935699	0.202003	-2.21167	0	0	6;1;1;3;3;418;607;2091;589;1457;1566	2;417;538;1;4;2;0;1;1;1212;208	5.966,0.809,1.000,2.580,2.686,380.203,524.462,1911.882,490.462	1.989,337.206,538.000.0.860,3.582,1.819,0.000,0.914,0.833	31.214	25.965	61.446	8.161	1.969	0.314	0.896689	0.178384	-2.32962	0	0
chrIV:103381-oORF	chrIV;103422;103353	oORF	Scer	N	NA	NA	NA	NA	41	NA	GGAACCUGU	CUG	NA	NA	NA	NA	NA	YDL199C|chrIV;103422;103353|103381,103353,AAG	YDL199C|chrIV;103422;103353|WT	1;4;1;3;8;6;450;2373;3138;2017;2137	3;3;1;3;2;466;1142;1994;1646;1369;1476	0.860,3.576,0.913,2.512,8.000,4.478,338.019,1844.728,2412.896	2.581,2.682,0.913.2.512,2.000,347.801,857.818,1550.100,1265.655	44.008	29.87	83.707	57.815	1.902	1.936	0.940806	0.894389	-0.0729953	3.84e-132	6.8e-132	7;5;0;18;6;4;864;4327;3717;2148;1802	10;2;0;2;0;704;1397;806;1349;769;604	6.961,4.043,0.000,15.480,5.372,3.638,746.516,3956.343,3095.157	9.944,1.617,0.000.1.720,0.000,640.341,1207.041,736.957,1123.316	46.018	16.475	70.706	23.7	1.536	1.439	0.945573	0.880334	-0.103138	8.34e-193	1.62e-192
chrIV:1035698-1035626	chrIV;1035736;1035575	uORF	Scer	N	0.051	0.0737973	0.000666667	72	38	51	CUAUGAUGU	AUG	UGCGCAAGUUGUUACCUUUCCGUAGAGAGUUCGGAGUUGAUGCAUUGUAAAGUUUCGUUUAAUUCAUAA	0.716647	MCASCYLSVESSELMHCKVSFNS	UAA	CAGAAAUUCG	YDR286C|chrIV;1035736;1035575|1035698,AAG	YDR286C|chrIV;1035736;1035575|WT	457;249;0;0;0;0;0;0;0;399;0	2034;1316;0;182;1;3;2;1;2;960;0	393.122,222.612,0.000,0.000,0.000,0.000,0.000,0.000,0.000	1749.695,1176.537,0.000.152.366,1.000,2.239,1.502,0.777,1.538	8.706	20.946	0	0	0	0	0.0329781	0.0556744	0.755508	0.000336	0.000372	0;541;72;0;0;0;0;1;0;277;0	1815;1210;0;1;0;2;2;0;2;633;51	0.000,437.478,72.000,0.000,0.000,0.000,0.000,0.914,0.000	1804.865,978.464,0.000.0.860,0.000,1.819,1.728,0.000,1.665	5.934	13.561	0	2.001	0	0.148	0.0968657	0.0321498	-1.59118	2.77e-138	4.95e-138
chrIV:1035701-1035626	chrIV;1035736;1035575	uORF	Scer	N	0.0243333	0.0712078	0.000666667	75	35	51	GGUCUAUGA	AUG	AUGUGCGCAAGUUGUUACCUUUCCGUAGAGAGUUCGGAGUUGAUGCAUUGUAAAGUUUCGUUUAAUUCAUAA	0.726665	MMCASCYLSVESSELMHCKVSFNS	UAA	CAGAAAUUCG	YDR286C|chrIV;1035736;1035575|1035701,AAG	YDR286C|chrIV;1035736;1035575|WT	782;122;395;0;0;0;2;0;0;175;0	2034;1316;0;182;1;3;2;1;2;960;0	672.695,109.071,360.471,0.000,0.000,0.000,1.502,0.000,0.000	1749.695,1176.537,0.000.152.366,1.000,2.239,1.502,0.777,1.538	3.818	20.946	0	0	0	0	0.0911646	0.0556744	-0.711459	9.12e-05	0.000101522	0;590;0;0;0;1;1;1;0;334;8	1815;1210;0;1;0;2;2;0;2;633;51	0.000,477.102,0.000,0.000,0.000,0.910,0.864,0.914,0.000	1804.865,978.464,0.000.0.860,0.000,1.819,1.728,0.000,1.665	7.155	13.561	0.314	2.001	0.044	0.148	0.0761311	0.0321498	-1.24367	7.86e-114	1.33e-113
chrIV:1035709-1035697	chrIV;1035736;1035575	uORF	Scer	N	0.012	0.0142857	0.032	12	27	122	GCUUUAUGG	AUG	GGUCUAUGA	0.79933	MGL	UGA	UGUGCGCAAG	YDR286C|chrIV;1035736;1035575|1035709,AAG	YDR286C|chrIV;1035736;1035575|WT	981;367;0;0;0;0;1;0;0;880;0	2034;1316;0;182;1;3;2;1;2;960;0	843.879,328.107,0.000,0.000,0.000,0.000,0.751,0.000,0.000	1749.695,1176.537,0.000.152.366,1.000,2.239,1.502,0.777,1.538	19.2	20.946	0	0	0	0	0.028174	0.0556744	0.98265	3.31e-17	4.1e-17	452;565;0;0;2;1;0;0;0;489;0	1815;1210;0;1;0;2;2;0;2;633;51	449.476,456.886,0.000,0.000,1.791,0.910,0.000,0.000,0.000	1804.865,978.464,0.000.0.860,0.000,1.819,1.728,0.000,1.665	10.476	13.561	0	2.001	0	0.148	0.0417757	0.0321498	-0.377853	5.17e-12	6.03e-12
chrIV:104619-104604	chrIV;104656;104551	uORF	Scer	Y	0.0706667	0.0362353	0.00166667	15	37	53	UUUUGAUGG	AUG	GUUAAUAUUUAG	1	MVNI	UAG	CCUUUAGACA	YDL198C|chrIV;104656;104551|104619,104604,AAG	YDL198C|chrIV;104656;104551|WT	0;1;1;1;1;1;0;2;1306;888;379	15;11;11;85;364;3346;15534;4260;1836;2395;2209	0.000,0.894,0.913,0.837,1.000,0.746,0.000,1.555,1004.220	12.903,9.834,10.038.71.160,364.000,2497.298,11668.424,3311.649,1411.752	19.375	52.256	14.846	86.527	0.766	1.656	0.996353	0.829525	-0.264371	0	0	1;2;0;0;2;1;0;1;133;401;372	17;11;3;3;407;819;7350;2798;113;3856;995	0.994,1.617,0.000,0.000,1.791,0.910,0.000,0.914,110.749	16.905,8.895,3.000.2.580,364.434,744.942,6350.571,2558.319,94.095	8.591	82.609	14.596	39.042	1.699	0.473	0.965093	0.841851	-0.197103	3.9e-62	5.79e-62
chrIV:1059563-1059584	chrIV;1059558;1059626	uORF	Scer	N	0.002	0.002	0.001	21	5	42	ND-too-cl	AUG	CAGCGUACCAUACAUUGA	0.608723	MQRTIH	UGA	GUAACAAUAA	YDR299W|chrIV;1059558;1059626|1059563,AAG	YDR299W|chrIV;1059558;1059626|WT	2;3;4;5;1;1;269;1442;1847;1224;1904	73;2907;1016;3;243;4;2;8;2;1840;544	1.720,2.682,3.650,4.186,1.000,0.746,202.060,1120.985,1420.210	62.796,2598.931,927.186.2.512,243.000,2.985,1.502,6.219,1.538	26.706	40.146	74.58	21.309	2.793	0.531	0.938481	0.149164	-2.65342	0	0	3;2;0;3;3;137;643;896;4810;1419;2299	108;2506;2314;1;1;0;3;1;6;2303;1115	2.983,1.617,0.000,2.580,2.686,124.612,555.567,819.247,4005.301	107.397,2026.471,2314.000.0.860,0.895,0.000,2.592,0.914,4.996	30.4	49.338	90.208	43.75	2.967	0.887	0.965281	0.158309	-2.60821	0	0
chrIV:107103-107109	chrIV;107088;107207	uORF	Scer	N	0.959	0.981333	0.985333	6	15	98	CGCUACUGU	CUG	UAG	1	M	UAG	GUGUAGAACA	YDL195W|chrIV;107088;107207|107103,107109,AAG	YDL195W|chrIV;107088;107207|WT	37;32;20;12;416;7788;28256;11407;9239;13917;1153	81;29;26;471;41;10246;18309;16070;7356;12749;3707	31.828,28.609,18.252,10.046,416.000,5812.599,21224.603,8867.600,7104.125	69.678,25.927,23.727.394.310,41.000,7647.135,13752.875,12492.534,5656.234	303.651	278.167	45.163	145.204	0.149	0.522	0.850267	0.843362	-0.0117638	0.00061994	0.000682353	37;33;17;12;27;4662;12176;9597;4469;12441;1720	36;40;7;40;319;4450;15260;17110;1784;14935;3336	36.793,26.685,17.000,10.320,24.176,4240.441,10520.348,8774.907,3721.349	35.799,32.346,7.000.34.399,285.638,4047.611,13184.996,15644.333,1485.542	266.53	319.96	67.489	130.897	0.253	0.409	0.867196	0.867023	-0.000288592	0.80358	0.810143
chrIV:107171-107198	chrIV;107088;107207	uORF	Scer	Y	0.984333	0.999	1	27	83	9	UCCCUUUGU	UUG	UUCCCGUUUGCUCUCCCUAAUUGA	0.652355	MFPFALPN	UGA	ACAATAAAGA	YDL195W|chrIV;107088;107207|107171,107198,AAG	YDL195W|chrIV;107088;107207|WT	25;18;21;15;73;967;21028;13885;8005;10284;1930	81;29;26;471;41;10246;18309;16070;7356;12749;3707	21.506,16.092,19.164,12.558,73.000,721.724,15795.263,10793.954,6155.268	69.678,25.927,23.727.394.310,41.000,7647.135,13752.875,12492.534,5656.234	224.384	278.167	75.599	145.204	0.337	0.522	0.875996	0.843362	-0.0547724	2.86e-271	6.17e-271	28;28;10;651;283;1335;10002;11094;5889;10878;3326	36;40;7;40;319;4450;15260;17110;1784;14935;3336	27.844,22.642,10.000,559.846,253.403,1214.283,8641.961,10143.672,4903.787	35.799,32.346,7.000.34.399,285.638,4047.611,13184.996,15644.333,1485.542	233.045	319.96	130.505	130.897	0.56	0.409	0.884714	0.867023	-0.0291412	2.61e-275	5.65e-275
chrIV:1073567-oORF	chrIV;1073597;1073488	oORF	Scer	N	NA	NA	NA	NA	30	NA	AAGAUAUGG	AUG	NA	NA	NA	NA	NA	YDR305C|chrIV;1073597;1073488|1073567,AAG	YDR305C|chrIV;1073597;1073488|WT	12;8;65;7932;8540;496;11;6;8;5850;222	3517;1429;194;1;3;0;3;2;2;1865;95	10.323,7.152,59.318,6640.488,8540.000,370.191,8.263,4.664,6.151	3025.406,1277.562,177.041.0.837,3.000,0.000,2.253,1.555,1.538	127.639	40.692	8.696	3.721	0.068	0.091	0.485027	0.039103	-3.63271	0	0	13;16;293;7808;4442;180;12;6;6;5687;852	1158;461;1;1;1;3;3;2;3;1724;0	12.927,12.938,293.000,6714.710,3977.437,163.724,10.368,5.486,4.996	1151.534,372.787,1.000.0.860,0.895,2.729,2.592,1.829,2.498	121.835	36.934	33.431	0	0.274	0	0.441399	0.0303185	-3.86381	0	0
chrIV:1075219-1075195	chrIV;1075226;1075171	uORF	Scer	N	0.0113333	0.0630769	0.176333	24	7	24	CAAACAUGU	AUG	UGCAACAGCUCUAACACAUAA	0.72628	MCNSSNT	UAA	UCAUAUCAAC	YDR306C|chrIV;1075226;1075171|1075219,AAG	YDR306C|chrIV;1075226;1075171|WT	4;2;0;0;29;1349;1231;1;24;862;401	413;527;1;3;0;0;8;0;1;795;40	3.441,1.788,0.000,0.000,29.000,1006.830,924.670,0.777,18.454	355.272,471.151,0.913.2.512,0.000,0.000,6.009,0.000,0.769	18.808	17.346	15.707	1.567	0.835	0.09	0.765427	0.056245	-3.76647	0	0	1;1;0;1;120;1269;644;0;374;954;275	1245;1008;79;1;22;13;2;1;1;527;186	0.994,0.809,0.000,0.860,107.450,1154.251,556.431,0.000,311.431	1238.048,815.117,79.000.0.860,19.699,11.824,1.728,0.914,0.833	20.438	11.29	10.79	7.298	0.528	0.646	0.775655	0.050915	-3.92925	0	0
chrIV:1078462-oORF	chrIV;1078490;1078449	oORF	Scer	N	NA	NA	NA	NA	28	NA	AUUAUAUGC	AUG	NA	NA	NA	NA	NA	YDR308C|chrIV;1078490;1078449|1078462,AAG	YDR308C|chrIV;1078490;1078449|WT	0;0;0;0;0;2;302;148;41;91;127	0;0;1;1;31;349;302;24;0;202;534	0.000,0.000,0.000,0.000,0.000,1.493,226.848,115.053,31.526	0.000,0.000,0.913.0.837,31.000,260.477,226.848,18.657,0.000	1.986	4.407	4.975	20.917	2.505	4.746	0.862519	0.756916	-0.188422	2.77e-70	4.28e-70	0;1;0;0;1;2;109;179;0;154;208	0;0;0;1;55;146;353;1;34;299;378	0.000,0.809,0.000,0.000,0.895,1.819,94.179,163.667,0.000	0.000,0.000,0.000.0.860,49.248,132.798,305.000,0.914,28.312	3.299	6.406	8.161	14.832	2.474	2.315	0.890639	0.786661	-0.1791	8.99e-50	1.27e-49
chrIV:1090096-1090084	chrIV;1090142;1090079	uORF	Scer	N	0.00133333	0.00107143	0.001	12	46	5	AACAUAUGA	AUG	AAGAACUAA	0.784522	MKN	UAA	AGCGCATGAG	YDR313C|chrIV;1090142;1090079|1090096,AAG	YDR313C|chrIV;1090142;1090079|WT	23;22;0;4;23;389;1210;1227;577;1185;753	47;887;672;54;2;0;0;0;0;839;133	19.785,19.669,0.000,3.349,23.000,290.331,908.896,953.848,443.671	40.431,793.000,613.257.45.208,2.000,0.000,0.000,0.000,0.000	25.855	18.306	29.495	5.21	1.141	0.285	0.85201	0.154466	-2.46358	0	0	3;1;2;1;59;364;1805;685;1109;1016;924	3;1186;425;109;1;0;3;3;1;763;164	2.983,0.809,2.000,0.860,52.830,331.086,1559.562,626.322,923.467	2.983,959.056,425.000.93.738,0.895,0.000,2.592,2.743,0.833	21.766	16.346	36.256	6.435	1.666	0.394	0.879942	0.14265	-2.62493	0	0
chrIV:1092542-oORF	chrIV;1092600;1092511	oORF	Scer	N	NA	NA	NA	NA	58	NA	CAUACAUGA	AUG	NA	NA	NA	NA	NA	YDR314C|chrIV;1092600;1092511|1092542,AAG	YDR314C|chrIV;1092600;1092511|WT	417;7313;538;5;5;6;4;8;7;4946;492	9945;12375;381;195;8;15;18;18;13;9626;88	358.713,6538.005,490.970,4.186,5.000,4.478,3.005,6.219,5.382	8554.922,11063.559,347.695.163.250,8.000,11.195,13.521,13.993,9.996	107.915	210.027	19.272	3.447	0.179	0.016	0.0871481	0.0551464	-0.660202	0	0	385;7777;331;3;2;3;11;3;8;5052;491	7276;9078;295;303;137;11;20;13;15;9259;853	382.850,6288.854,331.000,2.580,1.791,2.729,9.504,2.743,6.662	7235.372,7340.905,295.000.260.573,122.672,10.005,17.280,11.886,12.491	108.232	198.36	19.266	33.47	0.178	0.169	0.0787624	0.0565674	-0.477537	0	0
chrIV:1092593-1092554	chrIV;1092600;1092511	uORF	Scer	N	0.00233333	0.00234146	0.00166667	39	7	43	GGUGAAUGA	AUG	ACCAAAUUCGAUAUUCAACGAAGGGUCAAACCUUGA	0.68701	MTKFDIQRRVKP	UGA	AACCUAGCAU	YDR314C|chrIV;1092600;1092511|1092593,AAG	YDR314C|chrIV;1092600;1092511|WT	76;7879;3838;3;8;11;22;6;8;6284;737	9945;12375;381;195;8;15;18;18;13;9626;88	65.377,7044.023,3502.499,2.512,8.000,8.210,16.525,4.664,6.151	8554.922,11063.559,347.695.163.250,8.000,11.195,13.521,13.993,9.996	137.109	210.027	28.868	3.447	0.211	0.016	0.134743	0.0551464	-1.28887	0	0	7;7734;3368;2;2;16;16;9;3;5974;1011	7276;9078;295;303;137;11;20;13;15;9259;853	6.961,6254.082,3368.000,1.720,1.791,14.553,13.824,8.229,2.498	7235.372,7340.905,295.000.260.573,122.672,10.005,17.280,11.886,12.491	127.984	198.36	39.669	33.47	0.31	0.169	0.132759	0.0565674	-1.23076	0	0
chrIV:1103704-1103710	chrIV;1103694;1103757	uORF	Scer	N	0	0.000333333	0.000666667	6	10	47	GGAAAAUGU	AUG	UGA	1	M	UGA	UUUCUUUACU	YDR318W|chrIV;1103694;1103757|1103704,AAG	YDR318W|chrIV;1103694;1103757|WT	10;5;8;7;132;1341;4448;4255;2031;3537;2287	3335;8269;125;30;6;11;15;10;11;5997;936	8.602,4.470,7.301,5.860,132.000,1000.860,3341.132,3307.762,1561.693	2868.845,7392.693,114.073.25.115,6.000,8.210,11.267,7.774,8.458	77.173	130.847	89.582	36.663	1.161	0.28	0.861075	0.0634506	-3.76243	0	0	12;12;6;8;477;1069;4838;2859;2563;3952;2453	4532;11349;177;216;5;12;9;6;10;6686;707	11.933,9.704,6.000,6.880,427.113,972.336,4180.145,2614.094,2134.217	4506.694,9177.344,177.000.185.755,4.477,10.915,7.776,5.486,8.327	84.666	143.238	96.25	27.741	1.137	0.194	0.868766	0.0593689	-3.87119	0	0
chrIV:1150750-1150774	chrIV;1150748;1150880	uORF	Scer	N	0.021	0.00320833	0	24	2	106	ND-too-cl	AUG	GCAAUAGUCCACAAACGAUAG	0.575418	MAIVHKR	UAG	GUACAUGAAG	YDR340W|chrIV;1150748;1150880|1150750,AAG	YDR340W|chrIV;1150748;1150880|WT	13712;161;5;5;3;4;9;6;7;5550;0	11113;1535;4;4;4;6;10;3;10;5567;0	11795.384,143.938,4.563,4.186,3.000,2.985,6.760,4.664,5.382	9559.663,1372.328,3.650.3.349,4.000,4.478,7.512,2.332,7.689	121.094	121.465	0	0	0	0	0.0112508	0.0193169	0.779833	7.71e-50	1.11e-49	8641;1342;2;3;7;1;4;5;5;4711;184	8887;2179;3;61;225;6;6;5;9;5043;98	8592.750,1085.205,2.000,2.580,6.268,0.910,3.456,4.572,4.164	8837.377,1762.044,3.000.52.459,201.469,5.457,5.184,4.572,7.494	100.926	108.039	7.22	3.845	0.072	0.036	0.017016	0.0321325	0.917137	5.75e-21	7.11e-21
chrIV:1150778-1150820	chrIV;1150748;1150880	uORF	Scer	N	0.000333333	0.00159524	0.000333333	42	30	60	GGUACAUGA	AUG	AAGGUGGCUCACAAUCAAAAAAAUCAAGCUUUAAAAUAG	0.882417	MKVAHNQKNQALK	UAG	UGGAUGUAGA	YDR340W|chrIV;1150748;1150880|1150778,AAG	YDR340W|chrIV;1150748;1150880|WT	14860;1018;7;6;197;7;6;8;4;6783;1	11113;1535;4;4;4;6;10;3;10;5567;0	12782.921,910.117,6.388,5.023,197.000,5.224,4.507,6.219,3.076	9559.663,1372.328,3.650.3.349,4.000,4.478,7.512,2.332,7.689	147.996	121.465	0.039	0	0	0	0.0222297	0.0193169	-0.202623	1.51e-09	1.77e-09	9113;2955;2;3;6;8;6;5;6;5854;212	8887;2179;3;61;225;6;6;5;9;5043;98	9062.115,2389.554,2.000,2.580,5.372,7.277,5.184,4.572,4.996	8837.377,1762.044,3.000.52.459,201.469,5.457,5.184,4.572,7.494	125.413	108.039	8.318	3.845	0.066	0.036	0.0233377	0.0321325	0.461369	0.0183	0.0193
chrIV:1198795-1198786	chrIV;1198801;1198697	uORF	Scer	Y	0.00133333	0.00172727	0.00133333	9	6	89	GUUUCAUGU	AUG	UCCUAA	0.777075	MS	UAA	AAACUAAAGC	YDR362C|chrIV;1198801;1198697|1198795,1198786,AAG	YDR362C|chrIV;1198801;1198697|WT	32;13;8;6;5;851;11282;5779;2745;6006;712	15;64;288;4728;5530;2571;1197;9;10;8283;1538	27.527,11.622,7.301,5.023,5.000,635.147,8474.517,4492.493,2110.707	12.903,57.218,262.824.3958.173,5530.000,1918.874,899.131,6.996,7.689	131.043	180.724	27.889	60.244	0.213	0.333	0.862699	0.536183	-0.686133	0	0	21;17;7;9;9;10;3554;7973;6307;6037;380	15;19;761;8044;8429;707;12;7;11;7960;828	20.883,13.747,7.000,7.740,8.059,9.096,3070.739,7290.021,5251.857	14.916,15.364,761.000.6917.664,7547.460,643.070,10.368,6.400,9.160	129.334	170.531	14.91	32.489	0.115	0.191	0.932407	0.466524	-0.999009	0	0
chrIV:1219343-1219394	chrIV;1219342;1219412	uORF	Scer	N	0.023	0.00707843	0.028	51	1	18	ND-too-cl	AUG	GUCCAACAAUUGUAUUUGCAGGUUGGUACUAACAACCUCUAUAAGUAG	0.772844	MVQQLYLQVGTNNLYK	UAG	ACGAUACAAG	YDR371W|chrIV;1219342;1219412|1219343,AAG	YDR371W|chrIV;1219342;1219412|WT	3;61;1599;2394;116;33;28;3;2;1662;4107	3511;299;3;2;4;2;6;3;3;1882;2	2.581,54.536,1459.222,2004.202,116.000,24.630,21.032,2.332,1.538	3020.245,267.313,2.738.1.674,4.000,1.493,4.507,2.332,2.307	36.263	41.063	160.872	0.078	4.436	0.002	0.338524	0.0185868	-4.18691	0	0	5;70;1890;1545;89;9;4;3;4;2229;3327	1842;1176;5;5;2;3;4;3;3;2061;865	4.972,56.605,1890.000,1328.666,79.692,8.186,3.456,2.743,3.331	1831.715,950.970,5.000.4.300,1.791,2.729,3.456,2.743,2.498	47.753	44.154	130.544	33.941	2.734	0.769	0.301878	0.0349472	-3.11072	0	0
chrIV:1234145-1234166	chrIV;1234112;1234217	uORF	Scer	Y	0.0143333	0.071	0.00833333	21	33	51	UCAACUUGA	UUG	AUACUCAAAACAAGUUGA	0.643463	MILKTS	UGA	CGCGACUUCU	YDR380W|chrIV;1234112;1234217|1234145,1234166,AAG	YDR380W|chrIV;1234112;1234217|WT	14;13;15;58;3462;7638;4662;455;12;9719;5291	22;10;20;7;10;4832;9948;5479;1612;7657;3420	12.043,11.622,13.689,48.556,3462.000,5700.646,3501.879,353.709,9.227	18.925,8.940,18.252.5.860,10.000,3606.379,7472.478,4259.278,1239.512	212.056	167.066	207.25	133.962	0.977	0.802	0.703075	0.83025	0.239868	0	0	9;15;165;7;5226;8125;2957;1010;13;10021;5746	21;16;167;143;17;3638;8535;10901;5758;6925;5038	8.950,12.130,165.000,6.020,4679.443,7390.302,2554.917,923.482,10.825	20.883,12.938,167.000.122.977,15.222,3309.036,7374.439,9967.205,4794.703	214.685	148.358	225.46	197.68	1.05	1.332	0.688317	0.879836	0.354162	0	0
chrIV:1234194-1234215	chrIV;1234112;1234217	uORF	Scer	Y	0.997	0.519476	0.356667	21	82	2	ACAAGAUAA	AUA	ACAAAGAAACUCCCUUAA	0.682419	MTKKLP	UAA	GCATGAGATC	YDR380W|chrIV;1234112;1234217|1234194,1234215,AAG	YDR380W|chrIV;1234112;1234217|WT	29;16;114;276;3008;21064;14731;1252;768;8763;9428	22;10;20;7;10;4832;9948;5479;1612;7657;3420	24.946,14.304,104.035,231.061,3008.000,15721.184,11065.247,973.283,590.537	18.925,8.940,18.252.5.860,10.000,3606.379,7472.478,4259.278,1239.512	191.197	167.066	369.297	133.962	1.931	0.802	0.744042	0.83025	0.158162	0	0	24;21;200;11;2476;12635;11178;1254;22;8775;8024	21;16;167;143;17;3638;8535;10901;5758;6925;5038	23.866,16.982,200.000,9.460,2217.049,11492.488,9658.053,1146.581,18.319	20.883,12.938,167.000.122.977,15.222,3309.036,7374.439,9967.205,4794.703	187.991	148.358	314.844	197.68	1.675	1.332	0.750188	0.879836	0.229983	0	0
chrIV:1236540-oORF	chrIV;1236460;1236557	oORF	Scer	Y	NA	NA	NA	NA	80	NA	AGAAAAUAC	AUA	NA	NA	NA	NA	NA	YDR381W|chrIV;1236460;1236557|1236540,1236573,AAG	YDR381W|chrIV;1236460;1236557|WT	0;8;0;2;2;2;349;1281;3189;897;841	10;4;1;3;65;1392;2053;1468;4828;2630;1605	0.000,7.152,0.000,1.674,2.000,1.493,262.153,995.827,2452.111	8.602,3.576,0.913.2.512,65.000,1038.924,1542.119,1141.197,3712.384	19.571	57.383	32.942	62.868	1.683	1.096	0.955772	0.902718	-0.0823904	2.17e-109	3.66e-109	1;3;3;4;2;1;737;554;1401;1246;357	9;9;3;2;9;498;3042;2191;1910;2424;882	0.994,2.426,3.000,3.440,1.791,0.910,636.785,506.544,1166.617	8.950,7.278,3.000.1.720,8.059,452.969,2628.359,2003.316,1590.462	26.694	51.931	14.008	34.608	0.525	0.666	0.936447	0.892952	-0.0686134	1.16e-102	1.91e-102
chrIV:1249900-1249828	chrIV;1249915;1249821	uORF	Scer	Y	0.00666667	0.471824	0.926	72	15	7	AGUCCAUGG	AUG	GUCAAAAAGUAUCUUUUCUCAGUAGAAAACAAAAGCGUACAGGCAAGCGACAGGAAAGUCAAAACUUGA	0.685725	MVKKYLFSVENKSVQASDRKVKT	UGA	TAGAGGTATG	YDR387C|chrIV;1249915;1249821|1249900,1249828,AAG	YDR387C|chrIV;1249915;1249821|WT	18;13;9;29;13;3773;13136;3084;2409;6389;2238	181;17082;3581;642;15;30;21;18;13;8176;243	15.484,11.622,8.213,24.278,13.000,2815.991,9867.157,2397.447,1852.347	155.700,15271.735,3267.965.537.468,15.000,22.391,15.774,13.993,9.996	139.4	178.39	87.663	9.518	0.629	0.053	0.835201	0.115981	-2.84823	0	0	20;13;5;5;85;2752;6408;4363;2711;5749;1868	116;12749;3670;76;12;9;20;17;205;8970;1198	19.888,10.512,5.000,4.300,76.110,2503.152,5536.661,3989.259,2257.458	115.352,10309.451,3670.000.65.358,10.745,8.186,17.280,15.544,170.704	123.164	192.169	73.296	47.007	0.595	0.245	0.863149	0.128574	-2.74701	0	0
chrIV:1261581-1261620	chrIV;1261576;1261680	uORF	Scer	N	0.00133333	0.0215641	0.00866667	39	5	60	D-too-clo	GUG	GACAAACCAAUUCUGCCUAUUUCCUUUCACUCAUAA	0.772094	MDKPILPISFHS	UAA	GUUAUACAAG	YDR394W|chrIV;1261576;1261680|1261581,1261620,AAG	YDR394W|chrIV;1261576;1261680|WT	3;3;2;0;0;1;4;0;3476;620;404	3;1;4;4;2;362;515;4985;7010;2160;4735	2.581,2.682,1.825,0.000,0.000,0.746,3.005,0.000,2672.793	2.581,0.894,3.650.3.349,2.000,270.180,386.844,3875.251,5390.184	13.528	47.128	15.825	185.471	1.17	3.935	0.99694	0.941509	-0.0825308	3.09e-282	6.76e-282	1;4;0;1;2;0;0;0;2968;773;519	8;7;2;1;11;6;7;1146;8012;2461;3843	0.994,3.235,0.000,0.860,1.791,0.000,0.000,0.000,2471.462	7.955,5.661,2.000.0.860,9.850,5.457,6.048,1047.832,6671.615	16.56	52.723	20.364	150.791	1.23	2.86	0.997488	0.987287	-0.0148299	1.06e-24	1.34e-24
chrIV:1263282-oORF	chrIV;1263201;1263323	oORF	Scer	Y	NA	NA	NA	NA	81	NA	UAACAUUGC	UUG	NA	NA	NA	NA	NA	YDR395W|chrIV;1263201;1263323|1263282,1263348,AAG	YDR395W|chrIV;1263201;1263323|WT	21;14;3;10;11;1065;5205;5578;3384;3509;3946	18;13;13;10;5;2356;9483;6785;4301;5558;5452	18.065,12.516,2.738,8.372,11.000,794.866,3909.756,4336.239,2602.052	15.484,11.622,11.864.8.372,5.000,1758.408,7123.192,5274.539,3307.159	76.562	121.268	154.566	213.556	2.019	1.761	0.879192	0.866468	-0.021032	2.16e-52	3.14e-52	10;11;2;3;11;2069;6370;7525;4719;3789;3805	15;16;5;3;8;798;5829;5037;3955;5010;5057	9.944,8.895,2.000,2.580,9.850,1881.912,5503.829,6880.398,3929.525	14.916,12.938,5.000.2.580,7.163,725.841,5036.392,4605.523,3293.340	81.174	107.332	149.3	198.425	1.839	1.849	0.893333	0.899423	0.00980057	0.000421	0.000455
chrIV:1266183-1266189	chrIV;1266170;1266294	uORF	Scer	N	0.005	0.00116667	0.000666667	6	13	105	GUGGAAUGU	AUG	UGA	1	M	UGA	UAGUUUGAAA	YDR396W|chrIV;1266170;1266294|1266183,AAG	YDR396W|chrIV;1266170;1266294|WT	3;1;80;295;983;686;332;1;1;601;330	1990;1657;178;1;3;1;2;3;3;1886;1226	2.581,0.894,73.007,246.967,983.000,511.998,249.383,0.777,0.769	1711.845,1481.399,162.440.0.837,3.000,0.746,1.502,2.332,2.307	13.113	41.15	12.926	48.023	0.986	1.167	0.593633	0.0528737	-3.48895	0	0	1;38;1;240;545;556;581;1;0;535;579	1619;1222;10;2;2;0;1;0;1;2062;796	0.994,30.729,1.000,206.395,488.002,505.724,501.998,0.914,0.000	1609.960,988.168,10.000.1.720,1.791,0.000,0.864,0.000,0.833	11.462	44.175	22.719	31.233	1.982	0.707	0.649799	0.0343036	-4.24356	0	0
chrIV:1288010-1288004	chrIV;1288013;1287938	uORF	Scer	N	0.001	0.002125	0.00133333	6	3	66	ND-too-cl	UUG	UAG	1	M	UAG	UUUAAACGGU	YDR407C|chrIV;1288013;1287938|1288010,1288004,AAG	YDR407C|chrIV;1288013;1287938|WT	14;349;8935;2729;284;174;16;14;8;6699;7118	12;7;2262;6357;977;60;9;6;10;4291;6262	12.043,312.015,8153.941,2284.656,284.000,129.865,12.018,10.883,6.151	10.323,6.258,2064.266.5321.934,977.000,44.781,6.760,4.664,7.689	146.164	93.624	278.814	245.284	1.908	2.62	0.285061	0.375453	0.397366	0	0	16;179;10389;6191;1029;13;14;10;13;6671;7829	919;222;3277;5108;924;189;9;7;8;3377;4547	15.911,144.748,10389.000,5324.125,921.383,11.824,12.096,9.143,10.825	913.868,179.520,3277.000.4392.768,827.364,171.910,7.776,6.400,6.662	142.916	72.347	307.193	178.414	2.149	2.466	0.300253	0.313606	0.0627726	2.93e-61	4.33e-61
chrIV:1288011-1287999	chrIV;1288013;1287938	uORF	Scer	N	0.00166667	0.00471429	0.00833333	12	2	61	ND-too-cl	AUU	GUAGUUUAA	0.824612	MVV	UAA	ACGGUUCUAG	YDR407C|chrIV;1288013;1287938|1288011,1287999,AAG	YDR407C|chrIV;1288013;1287938|WT	22;12;12829;8385;1433;160;24;15;21;10672;12618	12;7;2262;6357;977;60;9;6;10;4291;6262	18.925,10.728,11707.545,7019.729,1433.000,119.417,18.028,11.661,16.147	10.323,6.258,2064.266.5321.934,977.000,44.781,6.760,4.664,7.689	232.849	93.624	494.25	245.284	2.123	2.62	0.320913	0.375453	0.22645	0	0	23;350;13356;8904;456;129;20;15;16;12162;15037	919;222;3277;5108;924;189;9;7;8;3377;4547	22.872,283.027,13356.000,7657.246,408.310,117.335,17.280,13.715,13.323	913.868,179.520,3277.000.4392.768,827.364,171.910,7.776,6.400,6.662	260.553	72.347	590.018	178.414	2.264	2.466	0.295387	0.313606	0.0863447	5.32e-85	8.41e-85
chrIV:1295489-1295444	chrIV;1295569;1295411	uORF	Scer	N	0.969667	0.522766	0.006	45	80	33	UACAUAUGC	AUG	CACAGUAUAUACUUUUCCAAAAAAAAAUCAAACACUGUUUGA	0.812304	MHSIYFSKKKSNTV	UGA	GCGUCAAGAA	YDR413C|chrIV;1295569;1295411|1295489,AAG	YDR413C|chrIV;1295569;1295411|WT	1627;1098;1;2;0;0;1;0;1;894;206	1665;371;0;0;1;0;1;0;2;372;139	1399.584,981.639,0.913,1.674,0.000,0.000,0.751,0.000,0.769	1432.272,331.683,0.000.0.000,1.000,0.000,0.751,0.000,1.538	19.506	8.117	8.069	5.445	0.414	0.671	0.0375445	0.0233889	-0.682778	1.24e-34	1.68e-34	1685;563;0;0;0;0;1;0;1;710;177	1307;1;1;1;0;2;1;0;0;608;18	1675.591,455.269,0.000,0.000,0.000,0.000,0.864,0.000,0.833	1299.702,0.809,1.000.0.860,0.000,1.819,0.864,0.000,0.000	15.211	13.025	6.945	0.706	0.457	0.054	0.0223591	0.010329	-1.11416	9.66e-25	1.22e-24
chrIV:1311994-1312009	chrIV;1311960;1312039	uORF	Scer	N	0.00833333	0.00326667	0.00166667	15	34	30	AAUAUAUGA	AUG	AUCCACGCAUAA	0.70862	MIHA	UAA	UAAGGUUACA	YDR421W|chrIV;1311960;1312039|1311994,AAG	YDR421W|chrIV;1311960;1312039|WT	11;8;9;234;4153;2903;1884;203;9;3590;6330	11;5;2432;5703;503;270;9;157;4;3994;2886	9.462,7.152,8.213,195.899,4153.000,2166.663,1415.174,157.809,6.920	9.462,4.470,2219.405.4774.420,503.000,201.515,6.760,122.049,3.076	78.329	87.144	247.948	113.045	3.165	1.297	0.644152	0.375565	-0.778339	0	0	12;8;10;294;3445;5384;456;9;549;5234;6396	4;11;2584;7926;1172;129;7;7;5;4354;3241	11.933,6.469,10.000,252.834,3084.707,4897.155,393.995,8.229,457.154	3.978,8.895,2584.000.6816.187,1049.427,117.335,6.048,6.400,4.164	112.131	93.278	250.965	127.17	2.238	1.363	0.662487	0.366803	-0.852888	0	0
chrIV:1319297-oORF	chrIV;1319298;1319275	oORF	Scer	N	NA	NA	NA	NA	1	NA	ND-too-cl	AUG	NA	NA	NA	NA	NA	YDR423C|chrIV;1319298;1319275|1319297,AAG	YDR423C|chrIV;1319298;1319275|WT	0;0;0;0;29;0;185;1;0;22;0	0;106;70;0;0;0;1;0;0;80;72	0.000,0.000,0.000,0.000,29.000,0.000,138.963,0.777,0.000	0.000,94.767,63.881.0.000,0.000,0.000,0.751,0.000,0.000	0.48	1.745	0	2.82	0	1.616	0.781505	0.148782	-2.39306	9.11e-55	1.33e-54	0;0;0;0;0;37;0;13;37;31;41	4;200;83;0;0;0;0;1;0;77;42	0.000,0.000,0.000,0.000,0.000,33.654,0.000,11.886,30.810	3.978,161.730,83.000.0.000,0.000,0.000,0.000,0.914,0.000	0.664	1.65	1.609	1.648	2.423	0.999	0.859204	0.129609	-2.72884	6.76e-40	9.12e-40
chrIV:1333995-oORF	chrIV;1333997;1333969	oORF	Scer	N	NA	NA	NA	NA	2	NA	ND-too-cl	AUG	NA	NA	NA	NA	NA	YDR435C|chrIV;1333997;1333969|1333995,AAG	YDR435C|chrIV;1333997;1333969|WT	0;0;0;1;0;1;113;169;128;162;258	0;0;7;16;98;37;0;0;0;99;218	0.000,0.000,0.000,0.837,0.000,0.746,84.880,131.378,98.423	0.000,0.000,6.388.13.395,98.000,27.615,0.000,0.000,0.000	3.535	2.16	10.106	8.539	2.859	3.953	0.90614	0.551649	-0.715983	6.87e-67	1.05e-66	0;0;0;0;0;17;34;195;273;98;274	0;0;0;2;156;87;0;0;1;64;144	0.000,0.000,0.000,0.000,0.000,15.463,29.377,178.296,227.328	0.000,0.000,0.000.1.720,139.685,79.133,0.000,0.000,0.833	2.1	1.371	10.751	5.65	5.12	4.121	0.950892	0.605096	-0.652116	1.29e-95	2.1e-95
chrIV:1338159-1338234	chrIV;1338134;1338273	uORF	Scer	N	0.968333	0.587613	0.00333333	75	25	39	UAUAGAUGA	AUG	AAAGUUGAAAUGAAUAUUCAAAAGAAUAUAUAUAAUAAUGCAGGAGAUCAAGGAAGAAUUAGAUAUGUAUAA	0.880817	MKVEMNIQKNIYNNAGDQGRIRYV	UAA	GAGUGAUGGU	YDR438W|chrIV;1338134;1338273|1338159,AAG	YDR438W|chrIV;1338134;1338273|WT	1212;1;0;0;0;0;2;0;0;412;0	3674;1;49;0;0;1;1;0;2;1296;0	1042.591,0.894,0.000,0.000,0.000,0.000,1.502,0.000,0.000	3160.461,0.894,44.717.0.000,0.000,0.746,0.751,0.000,1.538	8.989	28.277	0	0	0	0	0.0101112	0.0129138	0.352962	0.537	0.552	706;1;1;0;1;3;0;0;1;419;60	2415;750;27;0;0;2;2;1;1;1213;78	702.058,0.809,1.000,0.000,0.895,2.729,0.000,0.000,0.833	2401.515,606.486,27.000.0.000,0.000,1.819,1.728,0.914,0.833	8.976	25.987	2.354	3.061	0.262	0.118	0.0137745	0.0243546	0.822198	2.27e-16	2.73e-16
chrIV:1338226-1338259	chrIV;1338134;1338273	uORF	Scer	N	0.0293333	0.0125758	0.00633333	33	92	14	UAGAUAUGU	AUG	UAUAAGAGUGAUGGUAGAGGCAAAAAAUAA	0.848467	MYKSDGRGKK	UAA	AAAGUAAGCA	YDR438W|chrIV;1338134;1338273|1338226,AAG	YDR438W|chrIV;1338134;1338273|WT	1178;0;0;0;2;1;0;0;1;313;0	3674;1;49;0;0;1;1;0;2;1296;0	1013.343,0.000,0.000,0.000,2.000,0.746,0.000,0.000,0.769	3160.461,0.894,44.717.0.000,0.000,0.746,0.751,0.000,1.538	6.829	28.277	0	0	0	0	0.0117347	0.0129138	0.138133	0.61	0.625	1635;0;0;1;0;2;0;3;0;432;47	2415;750;27;0;0;2;2;1;1;1213;78	1625.870,0.000,0.000,0.860,0.000,1.819,0.000,2.743,0.000	2401.515,606.486,27.000.0.000,0.000,1.819,1.728,0.914,0.833	9.255	25.987	1.844	3.061	0.199	0.118	0.0107133	0.0243546	1.18479	2.6e-31	3.39e-31
chrIV:1339576-1339582	chrIV;1339574;1339675	uORF	Scer	N	0.0313333	0.014	0.0103333	6	2	93	ND-too-cl	AUG	UGA	1	M	UGA	ACCUGAUAGA	YDR439W|chrIV;1339574;1339675|1339576,AAG	YDR439W|chrIV;1339574;1339675|WT	329;385;12124;4814;313;16;11;13;11;8652;3482	5348;13723;4;6;16;17;18;23;15;10644;1769	283.014,344.200,11064.173,4030.170,313.000,11.942,8.263,10.106,8.458	4600.475,12268.705,3.650.5.023,16.000,12.688,13.521,17.880,11.534	188.775	232.238	136.391	69.292	0.723	0.298	0.281546	0.061127	-2.20349	0	0	112;1311;10937;3666;265;13;13;13;18;7105;2159	8651;20998;165;19;13;480;32;13;15;9322;1223	111.375,1060.137,10937.000,3152.680,237.285,11.824,11.232,11.886,14.989	8602.694,16979.987,165.000.16.340,11.640,436.596,27.649,11.886,12.491	152.214	199.71	84.714	47.988	0.557	0.24	0.26086	0.0643399	-2.01949	0	0
chrIV:1345129-1345114	chrIV;1345211;1345062	uORF	Scer	N	0.0166667	0.0110588	0.001	15	82	52	AGAUAAUUU	AUU	UUCGCUCCUUAA	0.849591	MFAP	UAA	AAAAAGAGAG	YDR441C|chrIV;1345211;1345062|1345129,1345114,AAG	YDR441C|chrIV;1345211;1345062|WT	1061;2568;19;0;0;2;2;1;2;770;0	633;3028;0;1;0;1;3;0;2;1588;28	912.697,2295.856,17.339,0.000,0.000,1.493,1.502,0.777,1.538	544.521,2707.108,0.000.0.837,0.000,0.746,2.253,0.000,1.538	16.8	34.648	0	1.097	0	0.032	0.059757	0.066489	0.154008	1.43e-14	1.74e-14	266;726;136;2;2;2;1;0;1;1388;247	95;1695;2;0;0;0;3;1;1;1572;413	264.515,587.078,136.000,1.720,1.791,1.819,0.864,0.000,0.833	94.470,1370.658,2.000.0.000,0.000,0.000,2.592,0.914,0.833	29.736	33.678	9.692	16.205	0.326	0.481	0.0819973	0.070454	-0.218895	0.00328	0.00351
chrIV:1350210-oORF	chrIV;1350204;1350289	oORF	Scer	N	NA	NA	NA	NA	6	NA	AGGAAAUGC	AUG	NA	NA	NA	NA	NA	YDR444W|chrIV;1350204;1350289|1350210,AAG	YDR444W|chrIV;1350204;1350289|WT	27;47;8440;19929;2253;423;51;20;21;12461;6961	10623;5332;9;9;262;11;16;7;12;7172;1927	23.226,42.019,7702.212,16684.100,2253.000,315.707,38.309,15.548,16.147	9138.154,4766.941,8.213.7.535,262.000,8.210,12.018,5.442,9.227	271.883	156.484	272.664	75.481	1.003	0.482	0.366502	0.043854	-3.06304	0	0	26;168;8800;16527;2426;42;29;18;18;11887;7819	8234;5215;288;375;12;7;16;8;10;6565;1178	25.855,135.853,8800.000,14212.859,2172.279,38.202,25.057,16.458,14.989	8188.023,4217.098,288.000.322.492,10.745,6.367,13.824,7.315,8.327	254.661	140.645	306.8	46.222	1.205	0.329	0.34544	0.0457078	-2.91792	0	0
chrIV:1362728-1362758	chrIV;1362727;1362877	uORF	Scer	N	0.000666667	0.0044	0.00966667	30	1	119	ND-too-cl	AUG	GUAGAAUACAAGUCAGAAGAAGGCUAA	0.781012	MVEYKSEEG	UAA	AAUCAACAGA	YDR452W|chrIV;1362727;1362877|1362728,AAG	YDR452W|chrIV;1362727;1362877|WT	12;3;0;585;2255;3367;3178;465;2;2932;2426	2;4444;283;1;1;4;5;2;3;2058;143	10.323,2.682,0.000,489.749,2255.000,2512.971,2387.167,361.483,1.538	1.720,3973.047,258.261.0.837,1.000,2.985,3.756,1.555,2.307	63.972	44.903	95.027	5.601	1.485	0.125	0.689139	0.0890588	-2.95196	0	0	8;161;2;76;1625;2615;1306;2;4;2842;3067	249;3355;123;1;1;2;3;1;4;1766;374	7.955,130.192,2.000,65.358,1455.051,2378.540,1128.414,1.829,3.331	247.610,2713.013,123.000.0.860,0.895,1.819,2.592,0.914,3.331	60.886	37.834	120.342	14.675	1.977	0.388	0.669885	0.0759015	-3.14171	0	0
chrIV:1362821-1362851	chrIV;1362727;1362877	uORF	Scer	Y	0.841667	0.985533	0.988667	30	94	26	UCUCCUUGU	UUG	UCUCCAGCUAUUGUUUUCAUUGAGUAG	0.87201	MSPAIVFIE	UAG	GGGUAGAGCU	YDR452W|chrIV;1362727;1362877|1362821,1362851,AAG	YDR452W|chrIV;1362727;1362877|WT	1187;3681;1;2;4;2;1;1;1;1446;751	2;4444;283;1;1;4;5;2;3;2058;143	1021.085,3290.906,0.913,1.674,4.000,1.493,0.751,0.777,0.769	1.720,3973.047,258.261.0.837,1.000,2.985,3.756,1.555,2.307	31.55	44.903	29.417	5.601	0.932	0.125	0.061857	0.0890588	0.525823	4.15e-113	7.04e-113	883;2424;1;2;0;2;4;2;3;2139;307	249;3355;123;1;1;2;3;1;4;1766;374	878.069,1960.162,1.000,1.720,0.000,1.819,3.456,1.829,2.498	247.610,2713.013,123.000.0.860,0.895,1.819,2.592,0.914,3.331	45.825	37.834	12.046	14.675	0.263	0.388	0.0553137	0.0759015	0.456491	4.27e-64	6.37e-64
chrIV:1365714-1365672	chrIV;1365730;1365662	uORF	Scer	N	0.014	0.00738636	0.021	42	16	10	UAUUACUGU	CUG	UUUUUUGCUCAAGAAUAUAUUAGCCUUACAAGAACGUAA	0.81595	MFFAQEYISLTRT	UAA	AAAACCAATC	YDR453C|chrIV;1365730;1365662|1365714,1365672,AAG	YDR453C|chrIV;1365730;1365662|WT	10;9;5;8;8;9;251;1915;13371;4180;6507	106;16;7;12;7;59;354;4235;19029;6206;10091	8.602,8.046,4.563,6.697,8.000,6.717,188.540,1488.687,10281.335	91.184,14.304,6.388.10.046,7.000,44.035,265.908,3292.214,14631.929	91.202	135.407	254.881	395.267	2.795	2.919	0.981058	0.970521	-0.0155793	1.75e-18	2.19e-18	16;14;7;10;12;14;669;4576;19270;4569;5344	34;105;23;9;117;18;736;3785;21584;5433;9930	15.911,11.321,7.000,8.600,10.745,12.734,578.032,4184.013,16046.184	33.810,84.908,23.000.7.740,104.764,16.372,635.921,3460.771,17973.059	97.884	116.394	209.687	389.631	2.142	3.348	0.979008	0.975987	-0.00445956	6.19e-09	7.04e-09
chrIV:1365718-1365688	chrIV;1365730;1365662	uORF	Scer	N	0.009	0.00790625	0.000333333	30	12	26	ACACUAUUA	AUU	ACUGUUUUUUGCUCAAGAAUAUAUUAG	0.874898	MTVFCSRIY	UAG	CCUUACAAGA	YDR453C|chrIV;1365730;1365662|1365718,1365688,AAG	YDR453C|chrIV;1365730;1365662|WT	16;107;10;4;9;10;2242;2422;9341;4916;7603	106;16;7;12;7;59;354;4235;19029;6206;10091	13.764,95.661,9.126,3.349,9.000,7.464,1684.087,1882.820,7182.555	91.184,14.304,6.388.10.046,7.000,44.035,265.908,3292.214,14631.929	107.261	135.407	297.811	395.267	2.777	2.919	0.943782	0.970521	0.0403056	1.14e-118	1.96e-118	20;12;6;7;91;14;1551;5119;17417;5217;9748	34;105;23;9;117;18;736;3785;21584;5433;9930	19.888,9.704,6.000,6.020,81.483,12.734,1340.100,4680.499,14503.186	33.810,84.908,23.000.7.740,104.764,16.372,635.921,3460.771,17973.059	111.766	116.394	382.49	389.631	3.422	3.348	0.969663	0.975987	0.00937836	1.79e-77	2.78e-77
chrIV:1367478-oORF	chrIV;1367441;1367484	oORF	Scer	N	NA	NA	NA	NA	37	NA	ACCAUAUGA	AUG	NA	NA	NA	NA	NA	YDR456W|chrIV;1367441;1367484|1367478,AAG	YDR456W|chrIV;1367441;1367484|WT	1;2;2;0;0;85;1378;468;42;316;179	1;0;0;0;204;145;1;0;1;185;729	0.860,1.788,1.825,0.000,0.000,63.440,1035.090,363.815,32.295	0.860,0.000,0.000.0.000,204.000,108.221,0.751,0.000,0.769	6.895	4.036	7.011	28.555	1.017	7.075	0.841223	0.606801	-0.471265	1.26e-162	2.34e-162	2;3;0;0;2;114;404;299;57;276;1411	0;0;0;69;165;212;111;1;0;252;823	1.989,2.426,0.000,0.000,1.791,103.692,349.065,273.387,47.464	0.000,0.000,0.000.59.338,147.744,192.830,95.907,0.914,0.000	5.913	5.399	55.364	32.293	9.363	5.981	0.857802	0.646427	-0.408157	2.28e-126	3.96e-126
chrIV:1369729-1369744	chrIV;1369675;1369789	uORF	Scer	Y	0.877	0.9574	0.968333	15	54	45	UAUAAUUGG	UUG	GUGAGAAAAUAG	0.840353	MVRK	UAG	UGCAUAUUUA	YDR457W|chrIV;1369675;1369789|1369729,1369744,AAG	YDR457W|chrIV;1369675;1369789|WT	6;1;2;2;1;164;1290;483;1548;1736;2702	2;2;1;1;2;38;2284;186;0;1215;1773	5.161,0.894,1.825,1.674,1.000,122.402,968.988,375.476,1190.300	1.720,1.788,0.913.0.837,2.000,28.361,1715.635,144.593,0.000	37.877	26.51	105.838	69.449	2.794	2.62	0.905838	0.830584	-0.125126	4.66e-187	8.98e-187	4;1;1;1;3;1559;384;1324;239;1074;1907	3;2;2;1;1;1330;2357;1808;3;747;1257	3.978,0.809,1.000,0.860,2.686,1418.028,331.785,1210.584,199.016	2.983,1.617,2.000.0.860,0.895,1209.736,2036.503,1653.124,2.498	23.009	16.003	74.826	49.322	3.252	3.082	0.82216	0.836186	0.0244036	0.014	0.0148
chrIV:1369740-1369755	chrIV;1369675;1369789	uORF	Scer	N	0.979333	0.804867	0.571667	15	65	34	AGAAAAUAG	AUA	GUGCAUAUUUAG	0.840353	MVHI	UAG	UUUACUUUUU	YDR457W|chrIV;1369675;1369789|1369740,1369755,AAG	YDR457W|chrIV;1369675;1369789|WT	7;4;5;3;1;2912;4330;2359;4;1931;807	2;2;1;1;2;38;2284;186;0;1215;1773	6.022,3.576,4.563,2.512,1.000,2173.381,3252.496,1833.845,3.076	1.720,1.788,0.913.0.837,2.000,28.361,1715.635,144.593,0.000	42.132	26.51	31.61	69.449	0.75	2.62	0.808269	0.830584	0.0392904	7.49e-09	8.68e-09	7;4;1;3;163;1046;4569;671;5;1700;1054	3;2;2;1;1;1330;2357;1808;3;747;1257	6.961,3.235,1.000,2.580,145.953,951.416,3947.723,613.521,4.164	2.983,1.617,2.000.0.860,0.895,1209.736,2036.503,1653.124,2.498	36.42	16.003	41.357	49.322	1.136	3.082	0.818665	0.836186	0.0305507	3.18e-37	4.25e-37
chrIV:138242-138254	chrIV;138195;138290	uORF	Scer	N	0.009	0.00558333	0.00133333	12	47	36	AAAACUUGU	UUG	UUUCGGUAA	0.44194	MFR	UAA	CAGCAUUAUU	YDL179W|chrIV;138195;138290|138242,138254,AAG	YDL179W|chrIV;138195;138290|WT	16;12;10;4;29;14;15005;7855;3201;5918;10358	19;12;4;8;12;1909;5076;8361;3378;4010;3381	13.764,10.728,9.126,3.349,29.000,10.449,11271.063,6106.338,2461.338	16.344,10.728,3.650.6.697,12.000,1424.788,3812.857,6499.694,2597.438	129.123	87.493	405.725	132.435	3.142	1.514	0.867779	0.873985	0.0102808	1.22e-116	2.08e-116	19;12;5;10;11;1903;7397;5331;1033;5085;5920	16;15;4;9;143;1252;7880;6915;934;5026;4184	18.894,9.704,5.000,8.600,9.850,1730.922,6391.181,4874.339,860.182	15.911,12.130,4.000.7.740,128.044,1138.789,6808.504,6322.651,777.744	108.939	107.675	232.288	164.171	2.132	1.525	0.862436	0.871093	0.014409	9.6e-21	1.19e-20
chrIV:1383447-oORF	chrIV;1383539;1383443	oORF	Scer	N	NA	NA	NA	NA	92	NA	UGUAUAUGA	AUG	NA	NA	NA	NA	NA	YDR459C|chrIV;1383539;1383443|1383447,AAG	YDR459C|chrIV;1383539;1383443|WT	12;8;2;536;1684;4934;2656;737;12;3830;3433	209;5085;63;17;1;4;8;2;3;2585;950	10.323,7.152,1.825,448.727,1684.000,3682.507,1995.065,572.931,9.227	179.787,4546.117,57.493.14.232,1.000,2.985,6.009,1.555,2.307	83.566	56.401	134.471	37.212	1.609	0.66	0.70141	0.079357	-3.14383	0	0	9;115;5;4;2377;4410;2318;4;8;4102;1273	238;5033;3;3;3;3;3;4;7;2383;464	8.950,92.994,5.000,3.440,2128.403,4011.228,2002.806,3.657,6.662	236.671,4069.924,3.000.2.580,2.686,2.729,2.592,3.657,5.829	87.879	51.052	49.95	18.206	0.568	0.357	0.690117	0.0717033	-3.26673	0	0
chrIV:1395114-oORF	chrIV;1395009;1395120	oORF	Scer	N	NA	NA	NA	NA	105	NA	UUGGUAUGA	AUG	NA	NA	NA	NA	NA	YDR466W|chrIV;1395009;1395120|1395114,AAG	YDR466W|chrIV;1395009;1395120|WT	34;94;229;2245;14667;13199;3084;299;29;16021;6322	39;2748;30637;4794;391;39;32;24;33;18435;6620	29.248,84.038,208.982,1879.462,14667.000,9851.116,2316.558,232.437,22.299	33.549,2456.781,27958.848.4013.427,391.000,29.108,24.037,18.657,25.375	349.558	402.228	247.634	259.307	0.708	0.645	0.615719	0.255312	-1.27001	0	0	32;26;89;2284;17842;13502;3093;1070;36;14551;6888	40;5094;33107;6918;734;129;41;23;25;18265;5908	31.821,21.025,89.000,1964.190,15976.008,12281.090,2672.424,978.342,29.977	39.777,4119.252,33107.000.5949.329,657.235,117.335,35.425,21.030,20.818	311.733	391.3	270.27	231.817	0.867	0.592	0.628026	0.248668	-1.33661	0	0
chrIV:1397928-oORF	chrIV;1398021;1397909	oORF	Scer	N	NA	NA	NA	NA	93	NA	UAUUAAUGC	AUG	NA	NA	NA	NA	NA	YDR467C|chrIV;1398021;1397909|1397928,AAG	YDR467C|chrIV;1398021;1397909|WT	4094;17323;74;84;55;18;27;13;8;9757;3768	10452;10367;96;5;9;12;23;11;20;10235;692	3521.755,15487.195,67.531,70.323,55.000,13.434,20.281,10.106,6.151	8991.056,9268.357,87.608.4.186,9.000,8.956,17.277,8.551,15.379	212.885	223.314	147.593	27.106	0.693	0.121	0.0690917	0.0465688	-0.56915	0	0	3028;20022;9;9;12;15;15;9;12;8613;2345	10872;13051;396;11;401;11;14;21;15;10496;1323	3011.092,16190.746,9.000,7.740,10.745,13.644,12.960,8.229,9.992	10811.293,10553.662,396.000.9.460,359.062,10.005,12.096,19.201,12.491	184.521	224.861	92.013	51.912	0.499	0.231	0.0638572	0.0534214	-0.257432	0	0
chrIV:1397962-oORF	chrIV;1398021;1397909	oORF	Scer	N	NA	NA	NA	NA	59	NA	AAUACAUGC	AUG	NA	NA	NA	NA	NA	YDR467C|chrIV;1398021;1397909|1397962,AAG	YDR467C|chrIV;1398021;1397909|WT	13179;27728;193;749;209;28;42;24;26;18978;3868	10452;10367;96;5;9;12;23;11;20;10235;692	11336.885,24789.524,176.129,627.046,209.000,20.898,31.548,18.657,19.992	8991.056,9268.357,87.608.4.186,9.000,8.956,17.277,8.551,15.379	414.075	223.314	151.51	27.106	0.366	0.121	0.0663174	0.0465688	-0.510026	5.96e-302	1.34e-301	10091;29089;493;17;123;37;42;24;26;18722;4106	10872;13051;396;11;401;11;14;21;15;10496;1323	10034.654,23522.756,493.000,14.620,110.136,33.654,36.289,21.944,21.650	10811.293,10553.662,396.000.9.460,359.062,10.005,12.096,19.201,12.491	401.091	224.861	161.11	51.912	0.402	0.231	0.0595325	0.0534214	-0.15626	2.6e-284	5.71e-284
chrIV:1398009-1397967	chrIV;1398021;1397909	uORF	Scer	N	0.00166667	0.218114	0.9	42	12	58	CACUAAUGC	AUG	CCGAAGAGCUUCAAUCGAAGAUAUACUGGGCAUAUAUAA	0.607025	MPKSFNRRYTGHI	UAA	AAUACAUGCA	YDR467C|chrIV;1398021;1397909|1398009,AAG	YDR467C|chrIV;1398021;1397909|WT	15963;26244;1214;17;13;39;37;21;33;20637;4035	10452;10367;96;5;9;12;23;11;20;10235;692	13731.747,23462.791,1107.877,14.232,13.000,29.108,27.793,16.325,25.375	8991.056,9268.357,87.608.4.186,9.000,8.956,17.277,8.551,15.379	450.273	223.314	158.052	27.106	0.351	0.121	0.0592596	0.0465688	-0.347687	1.05e-165	1.95e-165	14070;26187;692;108;27;24;31;26;31;22015;3303	10872;13051;396;11;401;11;14;21;15;10496;1323	13991.436,21176.060,692.000,92.878,24.176,21.830,26.785,23.773,25.814	10811.293,10553.662,396.000.9.460,359.062,10.005,12.096,19.201,12.491	471.639	224.861	129.602	51.912	0.275	0.231	0.0533371	0.0534214	0.00227814	1.46e-73	2.24e-73
chrIV:1398017-1398008	chrIV;1398021;1397909	uORF	Scer	N	0.001	0.00118182	0.001	9	4	99	ND-too-cl	AUG	CACUAA	0.746748	MH	UAA	UGCCGAAGAG	YDR467C|chrIV;1398021;1397909|1398017,AAG	YDR467C|chrIV;1398021;1397909|WT	4457;10380;6;46;10;22;31;72;11;11241;5231	10452;10367;96;5;9;12;23;11;20;10235;692	3834.016,9279.979,5.476,38.510,10.000,16.420,23.286,55.972,8.458	8991.056,9268.357,87.608.4.186,9.000,8.956,17.277,8.551,15.379	245.264	223.314	204.9	27.106	0.835	0.121	0.0643141	0.0465688	-0.465773	8.51e-203	1.69e-202	4174;16720;4;216;13;12;20;9;12;12422;3431	10872;13051;396;11;401;11;14;21;15;10496;1323	4150.693,13520.591,4.000,185.755,11.640,10.915,17.280,8.229,9.992	10811.293,10553.662,396.000.9.460,359.062,10.005,12.096,19.201,12.491	266.123	224.861	134.625	51.912	0.506	0.231	0.0624125	0.0534214	-0.224417	0	0
chrIV:1401255-1401237	chrIV;1401323;1401214	uORF	Scer	N	0.000333333	0.00105	0.00333333	18	68	23	UGCCGAUUU	AUU	UUUGGUUUCCAAUAG	0.926719	MFGFQ	UAG	UAUAGGUUUA	YDR470C|chrIV;1401323;1401214|1401255,1401237,AAG	YDR470C|chrIV;1401323;1401214|WT	2541;8038;6;4;6;9;9;11;6;4754;867	1652;6745;3;4;7;7;8;2;4;5695;969	2185.828,7186.173,5.476,3.349,6.000,6.717,6.760,8.551,4.614	1421.089,6030.198,2.738.3.349,7.000,5.224,6.009,1.555,3.076	103.726	124.258	33.961	37.956	0.327	0.305	0.0634297	0.0660625	0.0586727	2.94e-06	3.33e-06	557;10439;106;4;4;10;11;7;6;4407;163	849;7826;3;5;6;6;11;4;4;4367;624	553.890,8441.474,106.000,3.440,3.582,9.096,9.504,6.400,4.996	844.259,6328.478,3.000.4.300,5.372,5.457,9.504,3.657,3.331	94.413	93.556	6.396	24.484	0.068	0.262	0.0725761	0.0672793	-0.109332	5.32e-13	6.25e-13
chrIV:1401323-1401275	chrIV;1401323;1401214	uORF	Scer	N	0.000666667	0.0016	0.00733333	48	0	61	ND-too-cl	AUG	GUUUUUAAUAUUAGCAAAGGUAGAGAGAAAAGGAAUUUUAAUUGA	0.846186	MVFNISKGREKRNFN	UGA	UUUGCCUUAA	YDR470C|chrIV;1401323;1401214|1401323,AAG	YDR470C|chrIV;1401323;1401214|WT	2;1;1;149;3892;1516;6;5;4;2399;984	1652;6745;3;4;7;7;8;2;4;5695;969	1.720,0.894,0.913,124.739,3892.000,1131.471,4.507,3.887,3.076	1421.089,6030.198,2.738.3.349,7.000,5.224,6.009,1.555,3.076	52.343	124.258	38.544	37.956	0.736	0.305	0.582748	0.0660625	-3.14097	0	0	9;5;3;46;2500;1739;3;9;2;1562;2237	849;7826;3;5;6;6;11;4;4;4367;624	8.950,4.043,3.000,39.559,2238.539,1581.752,2.592,8.229,1.665	844.259,6328.478,3.000.4.300,5.372,5.457,9.504,3.657,3.331	33.464	93.556	87.775	24.484	2.623	0.262	0.609572	0.0672793	-3.17956	0	0
chrIV:1403212-1403317	chrIV;1403202;1403321	uORF	Scer	Y	0.00333333	0.059581	0.155667	105	10	4	AGUUCAUGC	AUG	CUAAGAUUGAAGAAAAUUAUUUAUCGUAUACUUUGCAGGACAAGAGACACGGAAGCGACAGAAAGACAGGGAGUACUAUCACCAUCCAUAAUACUGGAGUAA	0.663425	MLRLKKIIYRILCRTRDTEATERQGVLSPSIILE	UAA	CATTATGAGA	YDR472W|chrIV;1403202;1403321|1403212,1403317,AAG	YDR472W|chrIV;1403202;1403321|WT	26;2399;22235;4922;242;494;26;11;26;11983;8514	24;15874;5201;229;11;25;25;16;20;11907;3696	22.366,2144.766,20291.314,4120.585,242.000,368.698,19.530,8.551,19.992	20.645,14191.752,4746.351.191.714,11.000,18.659,18.779,12.438,15.379	261.454	259.795	333.495	144.773	1.276	0.557	0.264241	0.124153	-1.08974	0	0	54;3962;18949;5805;7;20;19;14;16;9637;5574	21;19254;5757;401;17;15;11;10;22;12095;4316	53.698,3203.863,18949.000,4992.173,6.268,18.192,16.416,12.801,13.323	20.883,15569.705,5757.000.344.851,15.222,13.644,9.504,9.143,18.319	206.458	259.117	218.711	169.35	1.059	0.654	0.245716	0.122687	-1.00201	0	0
chrIV:1405920-1405911	chrIV;1405922;1405854	uORF	Scer	N	0.002	0.008	0.0226667	9	2	57	ND-too-cl	AUG	ACGUAA	0.634297	MT	UAA	AACAAUCAAA	YDR473C|chrIV;1405922;1405854|1405920,AAG	YDR473C|chrIV;1405922;1405854|WT	13;10;14;134;1359;4039;6621;3361;201;4943;9421	147;8480;2097;568;4;74;180;12;5;4991;1542	11.183,8.940,12.776,112.182,1359.000,3014.521,4973.389,2612.782,154.555	126.453,7581.332,1913.689.475.517,4.000,55.230,135.208,9.329,3.845	107.85	108.897	369.023	60.401	3.422	0.555	0.779072	0.136157	-2.51648	0	0	10;10;4;64;1741;7455;3820;690;6;4601;7440	130;7102;3071;13;8;13;7;7;6;4667;2292	9.944,8.086,4.000,55.039,1558.919,6780.886,3300.569,630.894,4.996	129.274,5743.017,3071.000.11.180,7.163,11.824,6.048,6.400,4.996	98.57	99.984	291.929	89.933	2.962	0.899	0.73114	0.130884	-2.48186	0	0
chrIV:141749-oORF	chrIV;141812;141721	oORF	Scer	Y	NA	NA	NA	NA	63	NA	UAUUGAUGU	AUG	NA	NA	NA	NA	NA	YDL177C|chrIV;141812;141721|141749,141721,AAG	YDL177C|chrIV;141812;141721|WT	10;3;4;3;0;6;3;295;5828;1503;1091	16;2865;3605;1296;188;7;8;9;4;4101;1031	8.602,2.682,3.650,2.512,0.000,4.478,2.253,229.328,4481.312	13.764,2561.382,3289.867.1084.981,188.000,5.224,6.009,6.996,3.076	32.794	89.479	42.735	40.385	1.303	0.451	0.990751	0.216565	-2.19372	0	0	6;5;3;3;2;7;1;1530;5684;1664;1123	3;3934;3480;687;5;1;7;10;2;3070;392	5.966,4.043,3.000,2.580,1.791,6.367,0.864,1398.938,4733.083	2.983,3181.220,3480.000.590.805,4.477,0.910,6.048,9.143,1.665	35.649	65.77	44.064	15.381	1.236	0.234	0.980758	0.178781	-2.45571	0	0
chrIV:141993-142023	chrIV;141969;142096	uORF	Scer	Y	0.998333	0.963667	0.908	30	24	73	GUUGAAUGG	AUG	GCAUCUAAUAGAACAAAACCAGGUUAA	0.963914	MASNRTKPG	UAA	GAUAGGUUUU	YDL176W|chrIV;141969;142096|141993,142023,AAG	YDL176W|chrIV;141969;142096|WT	19;8;9;14;8;1903;7600;10372;4543;6629;5139	20;13;313;6534;8471;1376;102;615;14;6891;2597	16.344,7.152,8.213,11.720,8.000,1420.310,5708.769,8063.010,3493.239	17.204,11.622,285.639.5470.115,8471.000,1026.982,76.618,478.090,10.765	144.636	150.353	201.296	101.725	1.392	0.677	0.876867	0.511144	-0.77863	0	0	18;24;7;9;113;1098;12224;6145;8416;5989;6998	14;15;535;7082;8422;3317;882;10;7;7099;4203	17.899,19.408,7.000,7.740,101.182,998.714,10561.821,5618.611,7008.027	13.922,12.130,535.000.6090.365,7541.192,3017.062,762.069,9.143,5.829	128.305	152.085	274.586	164.916	2.14	1.084	0.898754	0.520654	-0.787602	0	0
chrIV:142003-142048	chrIV;141969;142096	uORF	Scer	N	0.961	0.777733	0.408667	45	34	48	AUCUAAUAG	AUA	GAACAAAACCAGGUUAAGAUAGGUUUUACUUUGAGUUGUUAA	0.838085	MEQNQVKIGFTLSC	UAA	AUACACGCAG	YDL176W|chrIV;141969;142096|142003,142048,AAG	YDL176W|chrIV;141969;142096|WT	15;7;341;4038;9264;231;872;3;9;6235;2509	20;13;313;6534;8471;1376;102;615;14;6891;2597	12.903,6.258,311.191,3380.521,9264.000,172.408,655.006,2.332,6.920	17.204,11.622,285.639.5470.115,8471.000,1026.982,76.618,478.090,10.765	136.04	150.353	98.278	101.725	0.722	0.677	0.519402	0.511144	-0.0231224	1.3e-18	1.63e-18	16;16;69;4676;9297;1979;925;9;948;7587;4148	14;15;535;7082;8422;3317;882;10;7;7099;4203	15.911,12.938,69.000,4021.258,8324.680,1800.050,799.222,8.229,789.402	13.922,12.130,535.000.6090.365,7541.192,3017.062,762.069,9.143,5.829	162.54	152.085	162.758	164.916	1.001	1.084	0.558649	0.520654	-0.101618	6.1e-67	9.17e-67
chrIV:1420281-1420254	chrIV;1420305;1420250	uORF	Scer	N	0.000333333	0.0523103	0.172667	27	24	4	AGCAUACGG	ACG	GGACAUUAUUUGAACGCGCAUUAG	0.75126	MGHYLNAH	UAG	CAGCATGAGA	YDR481C|chrIV;1420305;1420250|1420281,1420254,AAG	YDR481C|chrIV;1420305;1420250|WT	6;6;9;3;36;1515;2910;1242;1002;1751;2534	3;10;13;74;213;1204;5260;1803;1878;2909;3805	5.161,5.364,8.213,2.512,36.000,1130.725,2185.858,965.509,770.466	2.581,8.940,11.864.61.951,213.000,898.609,3951.069,1401.620,1444.047	38.205	63.471	99.257	149.043	2.598	2.348	0.835867	0.84526	0.0161226	3.96e-11	4.69e-11	10;7;4;2;501;878;2877;1102;1039;2229;3197	10;14;5;1;405;1977;5283;2084;1981;2528;3086	9.944,5.661,4.000,1.720,448.603,798.607,2485.795,1007.601,865.178	9.944,11.321,5.000.0.860,362.643,1798.231,4564.635,1905.482,1649.584	47.753	54.159	125.443	121.088	2.627	2.236	0.835751	0.84683	0.0189996	0.0040134	0.0042837
chrIV:1434823-1434883	chrIV;1434769;1434923	uORF	Scer	Y	0.641333	0.9821	0.993667	60	54	40	CAAAAGUGA	GUG	AUUCUGGUUCCUAACUUUUCUAUUGUUUUCCAUUUUCGUCAUUCGUUUUGUUAUUAG	0.803464	MILVPNFSIVFHFRHSFCY	UAG	UCGCCUUAAU	YDR492W|chrIV;1434769;1434923|1434823,1434883,AAG	YDR492W|chrIV;1434769;1434923|WT	5;2;2;0;4;511;4174;1195;353;1014;1307	1;0;0;1;0;1375;1259;1041;1;434;868	4.301,1.788,1.825,0.000,4.000,381.386,3135.316,928.972,271.432	0.860,0.000,0.000.0.837,0.000,1026.236,945.703,809.255,0.769	22.124	9.469	51.196	34	2.314	3.591	0.840587	0.803628	-0.0648705	3.21e-45	4.55e-45	4;2;1;2;0;1;1580;1684;1;563;632	3;1;1;0;0;413;0;460;0;393;625	3.978,1.617,1.000,1.720,0.000,0.910,1365.157,1539.746,0.833	2.983,0.809,1.000.0.000,0.000,375.655,0.000,420.596,0.000	12.061	8.419	24.798	24.524	2.056	2.913	0.884953	0.818291	-0.112988	1.34e-22	1.67e-22
chrIV:1473066-1473027	chrIV;1473085;1472999	uORF	Scer	N	0.000666667	0.00929268	0.00233333	39	19	28	GACAUAUGA	AUG	AAUACUGCAUUUACUAGUAAUUUGCCUAGUAUAUAG	0.851795	MNTAFTSNLPSI	UAG	UUUGACUACA	YDR514C|chrIV;1473085;1472999|1473066,AAG	YDR514C|chrIV;1473085;1472999|WT	0;178;6778;411;2;4;8;1;11;4326;6720	1202;8368;242;12;7;11;17;5;11;7491;3490	0.000,159.136,6185.497,344.080,2.000,2.985,6.009,0.777,8.458	1033.989,7481.201,220.845.10.046,7.000,8.210,12.770,3.887,8.458	94.388	163.444	263.224	136.704	2.789	0.836	0.251188	0.076464	-1.71591	0	0	5;1358;6332;482;6;4;3;7;5;5111;4230	1271;12229;312;7;12;5;7;10;12;5857;2825	4.972,1098.144,6332.000,414.509,5.372,3.638,2.592,6.400,4.164	1263.903,9888.954,312.000.6.020,10.745,4.548,6.048,9.143,9.992	109.496	125.477	165.976	110.847	1.516	0.883	0.224023	0.0719268	-1.63904	0	0
chrIV:1476508-oORF	chrIV;1476528;1476476	oORF	Scer	N	NA	NA	NA	NA	20	NA	AAGAAUUGU	UUG	NA	NA	NA	NA	NA	YDR516C|chrIV;1476528;1476476|1476508,1476476,AAG	YDR516C|chrIV;1476528;1476476|WT	1;4;3;2;3;4;734;1795;2176;997;2692	6;2;13;30;1;3;304;1492;1471;1004;2445	0.860,3.576,2.738,1.674,3.000,2.985,551.347,1395.401,1673.187	5.161,1.788,11.864.25.115,1.000,2.239,228.351,1159.854,1131.093	21.753	21.906	105.446	95.771	4.847	4.372	0.92905	0.921818	-0.011275	0.67362	0.687596	2;5;0;1;1;2;378;1063;1657;1227;3034	5;0;0;1;55;31;784;1567;1428;1229;2665	1.989,4.043,0.000,0.860,0.895,1.819,326.601,971.942,1379.789	4.972,0.000,0.000.0.860,49.248,28.197,677.394,1432.769,1189.100	26.287	26.329	119.047	104.569	4.529	3.972	0.951814	0.927144	-0.037887	6.32e-38	8.48e-38
chrIV:1489997-oORF	chrIV;1490028;1489990	oORF	Scer	N	NA	NA	NA	NA	31	NA	GUUACAUGA	AUG	NA	NA	NA	NA	NA	YDR524C-A|chrIV;1490028;1489990|1489997,AAG	YDR524C-A|chrIV;1490028;1489990|WT	2;1;0;0;1;2;88;445;945;500;1718	1;1;1;0;0;69;442;317;175;169;329	1.720,0.894,0.000,0.000,1.000,1.493,66.102,345.935,726.637	0.860,0.894,0.913.0.000,0.000,51.498,332.010,246.430,134.562	10.909	3.687	67.294	12.887	6.169	3.495	0.953046	0.868435	-0.134128	5.81e-107	9.74e-107	3;2;2;2;2;24;104;407;864;500;1754	0;0;0;0;0;0;259;105;13;144;510	2.983,1.617,2.000,1.720,1.791,21.830,89.858,372.136,719.455	0.000,0.000,0.000.0.000,0.000,0.000,223.782,96.006,10.825	10.712	3.085	68.823	20.011	6.425	6.487	0.95345	0.872036	-0.128771	2.42e-89	3.86e-89
chrIV:1498214-oORF	chrIV;1498181;1498231	oORF	Scer	Y	NA	NA	NA	NA	33	NA	AGUGCAUGC	AUG	NA	NA	NA	NA	NA	YDR531W|chrIV;1498181;1498231|1498214,1498307,AAG	YDR531W|chrIV;1498181;1498231|WT	2;0;0;1;0;1;171;732;668;489;276	4;1;1;0;307;527;429;263;307;581;924	1.720,0.000,0.000,0.837,0.000,0.746,128.447,569.044,513.644	3.441,0.894,0.913.0.000,307.000,393.328,322.245,204.452,236.061	10.669	12.677	10.811	36.193	1.013	2.855	0.928067	0.772682	-0.264354	7.27e-171	1.37e-170	4;3;0;0;1;8;1237;281;1671;384;575	2;0;0;1;130;318;276;396;0;502;1033	3.978,2.426,0.000,0.000,0.895,7.277,1068.797,256.929,1391.447	1.989,0.000,0.000.0.860,116.404,289.245,238.470,362.078,0.000	8.227	10.755	22.562	40.533	2.742	3.769	0.927727	0.79787	-0.217546	6.13e-166	1.15e-165
chrIV:158778-158751	chrIV;158789;158735	uORF	Scer	N	0.004	0.00124138	0	27	11	16	GUUAAAUGC	AUG	CAGAUAGUUAUAUCGUGUUCAUAA	0.690352	MQIVISCS	UAA	CCGCUACUGA	YDL169C|chrIV;158789;158735|158778,AAG	YDL169C|chrIV;158789;158735|WT	7;3;3;3;6;209;1723;1592;1534;2052;4271	4;2;291;1604;1049;253;132;4;2;1626;2987	6.022,2.682,2.738,2.512,6.000,155.988,1294.238,1237.593,1179.535	3.441,1.788,265.562.1342.832,1049.000,188.827,99.152,3.110,1.538	44.772	35.477	167.296	117.002	3.737	3.298	0.892657	0.469812	-0.926022	0	0	56;6;2;30;5;124;1920;2059;3440;1754;4711	11;5;408;2721;946;2;3;3;4;2145;2659	55.687,4.852,2.000,25.799,4.477,112.787,1658.925,1882.623,2864.498	10.939,4.043,408.000.2340.001,847.063,1.819,2.592,2.743,3.331	37.577	45.953	184.849	104.333	4.919	2.27	0.922622	0.403954	-1.19155	0	0
chrIV:16116-oORF	chrIV;16088;16203	oORF	Scer	N	NA	NA	NA	NA	28	NA	UCUUCAUGA	AUG	NA	NA	NA	NA	NA	YDL244W|chrIV;16088;16203|16116,AAG	YDL244W|chrIV;16088;16203|WT	6;2;396;3193;1320;1;4;3;0;3611;293	3;4023;557;174;1;2;0;1;5;2242;0	5.161,1.788,361.383,2673.106,1320.000,0.746,3.005,2.332,0.000	2.581,3596.662,508.310.145.669,1.000,1.493,0.000,0.777,3.845	78.787	48.918	11.477	0	0.146	0	0.426698	0.10877	-1.97193	0	0	3;68;1521;5703;1563;5;10;3;6;3616;794	3;4978;1524;3;4;4;8;2;6;2401;126	2.983,54.988,1521.000,4904.455,1399.535,4.548,8.640,2.743,4.996	2.983,4025.449,1524.000.2.580,3.582,3.638,6.912,1.829,4.996	77.467	51.438	31.155	4.944	0.402	0.096	0.381998	0.120021	-1.67028	0	0
chrIV:167304-167286	chrIV;167305;167254	uORF	Scer	N	0.018	0.00495	0.00233333	18	1	32	ND-too-cl	AUG	AUUUUGGAGGUUUAG	0.843317	MILEV	UAG	AGCAGCUUUU	YDL164C|chrIV;167305;167254|167304,AAG	YDL164C|chrIV;167305;167254|WT	33;433;1794;47;1;2;0;0;4;909;842	105;577;22;1;1;0;1;1;2;666;394	28.387,387.113,1637.176,39.347,1.000,1.493,0.000,0.000,3.076	90.323,515.852,20.077.0.837,1.000,0.000,0.751,0.777,1.538	19.833	14.531	32.981	15.433	1.663	1.062	0.216128	0.0795276	-1.44236	4.31e-188	8.33e-188	2;553;1243;357;44;0;3;0;2;905;1442	255;911;110;15;20;0;0;1;0;603;218	1.989,447.182,1243.000,307.012,39.398,0.000,2.592,0.000,1.665	253.576,736.678,110.000.12.900,17.908,0.000,0.000,0.914,0.000	19.388	12.918	56.581	8.554	2.918	0.662	0.230566	0.0853839	-1.43314	3.69e-235	7.63e-235
chrIV:213324-oORF	chrIV;213174;213350	oORF	Scer	Y	NA	NA	NA	NA	150	NA	UAUAUAUGG	AUG	NA	NA	NA	NA	NA	YDL138W|chrIV;213174;213350|213324,213354,AAG	YDL138W|chrIV;213174;213350|WT	0;0;154;289;0;1;0;0;0;126;0	0;2444;532;3;2;1;2;2;0;771;0	0.000,0.000,140.538,241.944,0.000,0.746,0.000,0.000,0.000	0.000,2184.997,485.495.2.512,2.000,0.746,1.502,1.555,0.000	2.749	16.822	0	0	0	0	0.337769	0.109272	-1.62811	7.38e-190	1.43e-189	1;0;0;313;0;0;0;0;0;97;76	0;662;473;1;35;0;0;2;1;882;50	0.994,0.000,0.000,269.173,0.000,0.000,0.000,0.000,0.000	0.000,535.325,473.000.0.860,31.340,0.000,0.000,1.829,0.833	2.078	18.896	2.982	1.962	1.435	0.104	0.379576	0.164345	-1.20766	4.5e-122	7.76e-122
chrIV:222354-222375	chrIV;222291;222426	uORF	Scer	N	0.0206667	0.515476	0.979333	21	63	51	GAUUGCUGA	CUG	AGAAGGGAAAGUGAAUGA	0.809375	MRRESE	UGA	UAUUUUUUUG	YDL133W|chrIV;222291;222426|222354,222375,AAG	YDL133W|chrIV;222291;222426|WT	2;31;1830;3090;194;6;4;1;1;2505;1214	1;0;1182;583;0;2;0;0;3;730;246	1.720,27.715,1670.029,2586.877,194.000,4.478,3.005,0.777,0.769	0.860,0.000,1078.675.488.074,0.000,1.493,0.000,0.000,2.307	54.656	15.928	47.553	9.636	0.87	0.605	0.342123	0.2924	-0.226572	1.03e-77	1.62e-77	7;277;2462;916;122;4;4;2;1;2128;1850	2;320;711;263;1;1;1;1;2;1142;599	6.961,223.995,2462.000,787.740,109.241,3.638,3.456,1.829,0.833	1.989,258.767,711.000.226.174,0.895,0.910,0.864,0.914,1.665	45.589	24.466	72.59	23.503	1.592	0.961	0.269764	0.231791	-0.218876	1.34e-19	1.65e-19
chrIV:222371-222395	chrIV;222291;222426	uORF	Scer	Y	0.978	0.767208	0.357333	24	80	31	AGUGAAUGA	AUG	AUAUUUUUUUGCAUUUUUUGA	0.867034	MIFFCIF	UGA	GGCGUUCUUU	YDL133W|chrIV;222291;222426|222371,222395,AAG	YDL133W|chrIV;222291;222426|WT	5;4;3;5;638;2355;4323;1;321;1283;943	1;0;1182;583;0;2;0;0;3;730;246	4.301,3.576,2.738,4.186,638.000,1757.662,3247.238,0.777,246.826	0.860,0.000,1078.675.488.074,0.000,1.493,0.000,0.000,2.307	27.993	15.928	36.938	9.636	1.32	0.605	0.770197	0.2924	-1.39729	0	0	3;3;1;0;3;1267;4607;393;779;1118;1513	2;320;711;263;1;1;1;1;2;1142;599	2.983,2.426,1.000,0.000,2.686,1152.432,3980.555,359.335,648.676	1.989,258.767,711.000.226.174,0.895,0.910,0.864,0.914,1.665	23.951	24.466	59.367	23.503	2.479	0.961	0.836717	0.231791	-1.85192	0	0
chrIV:239656-239647	chrIV;239780;239606	uORF	Scer	N	0.0153333	0.0230909	0.037	9	124	41	ACAUUAUGA	AUG	AAGUAA	0.843996	MK	UAA	AAGGACAAUC	YDL125C|chrIV;239780;239606|239656,AAG	YDL125C|chrIV;239780;239606|WT	6070;1;1;2;0;93;1;1;0;2077;0	1287;1;1;0;2;1;1;0;1;813;138	5221.556,0.894,0.913,1.674,0.000,69.411,0.751,0.777,0.000	1107.108,0.894,0.913.0.000,2.000,0.746,0.751,0.000,0.769	45.317	17.739	0	5.405	0	0.305	0.0182912	0.0124613	-0.553698	0.705	0.718	3977;993;0;0;4;5;4;4;3;2315;12	1105;1;0;2;2;0;0;0;1;1077;0	3954.793,802.987,0.000,0.000,3.582,4.548,3.456,3.657,2.498	1098.830,0.809,0.000.1.720,1.791,0.000,0.000,0.000,0.833	49.595	23.073	0.471	0	0.009	0	0.021881	0.0105437	-1.0533	6.91e-18	8.4e-18
chrIV:239687-239615	chrIV;239780;239606	uORF	Scer	N	0.400333	0.0788514	0.00166667	72	93	9	AUGUGAUGU	AUG	UGUGUUCGACUGGAAAGCGGAGAACAUUAUGAAGUAAAAGGACAAUCAGCACGCCUUCCAGACUUUUAA	0.659319	MCVRLESGEHYEVKGQSARLPDF	UAA	GAAACATTGA	YDL125C|chrIV;239780;239606|239687,AAG	YDL125C|chrIV;239780;239606|WT	2136;165;0;1;1;3;1;0;0;941;0	1287;1;1;0;2;1;1;0;1;813;138	1837.437,147.514,0.000,0.837,1.000,2.239,0.751,0.000,0.000	1107.108,0.894,0.913.0.000,2.000,0.746,0.751,0.000,0.769	20.531	17.739	0	5.405	0	0.305	0.015716	0.0124613	-0.334785	0.00116	0.00127	865;106;0;0;0;1;0;0;0;799;0	1105;1;0;2;2;0;0;0;1;1077;0	860.170,85.717,0.000,0.000,0.000,0.910,0.000,0.000,0.000	1098.830,0.809,0.000.1.720,1.791,0.000,0.000,0.000,0.833	17.117	23.073	0	0	0	0	0.0144331	0.0105437	-0.452995	0.000776	0.000837
chrIV:239692-239686	chrIV;239780;239606	uORF	Scer	Y	0.559	0.555	0.546333	6	88	80	GUGUAAUGU	AUG	UGA	1	M	UGA	UGUGUGUUCG	YDL125C|chrIV;239780;239606|239692,239686,AAG	YDL125C|chrIV;239780;239606|WT	5011;165;2;0;0;1;1;2;2;1594;0	1287;1;1;0;2;1;1;0;1;813;138	4310.580,147.514,1.825,0.000,0.000,0.746,0.751,1.555,1.538	1107.108,0.894,0.913.0.000,2.000,0.746,0.751,0.000,0.769	34.779	17.739	0	5.405	0	0.305	0.0120071	0.0124613	0.0535669	0.154	0.161	2288;114;2;2;1;0;1;2;1;2042;87	1105;1;0;2;2;0;0;0;1;1077;0	2275.224,92.186,2.000,1.720,0.895,0.000,0.864,1.829,0.833	1098.830,0.809,0.000.1.720,1.791,0.000,0.000,0.000,0.833	43.747	23.073	3.414	0	0.078	0	0.0127905	0.0105437	-0.278689	0.073	0.0761
chrIV:239757-239691	chrIV;239780;239606	uORF	Scer	N	0.007	0.160868	0.558333	66	23	85	AAAUAAUGG	AUG	GCGGGUCCGUUCUCUUCUGAAGAAGUUACCGCCCUACUGAAGCAUUGCUGUACGAUCGUGUAA	0.671143	MAGPFSSEEVTALLKHCCTIV	UAA	UGUGAUGUGU	YDL125C|chrIV;239780;239606|239757,AAG	YDL125C|chrIV;239780;239606|WT	1326;108;0;0;2;1;0;1;0;948;0	1287;1;1;0;2;1;1;0;1;813;138	1140.656,96.555,0.000,0.000,2.000,0.746,0.000,0.777,0.000	1107.108,0.894,0.913.0.000,2.000,0.746,0.751,0.000,0.769	20.684	17.739	0	5.405	0	0.305	0.0163492	0.0124613	-0.391767	0.00178	0.00195	634;544;1;1;0;1;0;1;0;757;86	1105;1;0;2;2;0;0;0;1;1077;0	630.460,439.904,1.000,0.860,0.000,0.910,0.000,0.914,0.000	1098.830,0.809,0.000.1.720,1.791,0.000,0.000,0.000,0.833	16.218	23.073	3.374	0	0.208	0	0.036179	0.0105437	-1.77877	1.23e-60	1.82e-60
chrIV:258574-oORF	chrIV;258641;258555	oORF	Scer	N	NA	NA	NA	NA	67	NA	AAAAGUUGU	UUG	NA	NA	NA	NA	NA	YDL113C|chrIV;258641;258555|258574,258555,AAG	YDL113C|chrIV;258641;258555|WT	29849;4495;360;716;95;32;44;28;20;20187;3169	40189;5442;392;270;28;32;39;308;22;21357;3369	25676.810,4018.642,328.530,599.419,95.000,23.883,33.051,21.767,15.379	34571.521,4865.284,357.733.226.038,28.000,23.883,29.295,239.434,16.916	440.454	465.982	124.13	131.965	0.282	0.283	0.0315628	0.0279743	-0.174121	1.7e-08	1.96e-08	33571;8184;8;161;21;173;37;22;45;19697;4021	34544;8811;213;124;170;39;42;32;28;21916;4613	33383.546,6617.974,8.000,138.456,18.804,157.357,31.969,20.115,37.472	34351.113,7124.996,213.000.106.637,152.221,35.473,36.289,29.259,23.316	421.979	469.518	157.775	181.004	0.374	0.386	0.0247214	0.0253215	0.0345985	0.0119	0.0126
chrIV:258624-258579	chrIV;258641;258555	uORF	Scer	N	0.898	0.348128	0.00566667	45	17	24	AAGAGAUGA	AUG	ACUAGCUCGAAUACUGGUGGUGCAAUUGAACAUACCAUCUAG	0.800419	MTSSNTGGAIEHTI	UAG	AAAAGUUGUC	YDL113C|chrIV;258641;258555|258624,AAG	YDL113C|chrIV;258641;258555|WT	32182;6713;144;76;135;34;53;37;30;20439;3541	40189;5442;392;270;28;32;39;308;22;21357;3369	27683.712,6001.590,131.412,63.625,135.000,25.376,39.811,28.763,23.068	34571.521,4865.284,357.733.226.038,28.000,23.883,29.295,239.434,16.916	445.953	465.982	138.702	131.965	0.311	0.283	0.0271327	0.0279743	0.0440702	2.92e-24	3.75e-24	36163;10004;300;32;899;72;36;25;120;23488;4076	34544;8811;213;124;170;39;42;32;28;21916;4613	35961.073,8089.713,300.000,27.519,804.979,65.489,31.105,22.858,99.924	34351.113,7124.996,213.000.106.637,152.221,35.473,36.289,29.259,23.316	503.195	469.518	159.933	181.004	0.318	0.386	0.0348258	0.0253215	-0.459795	4.97e-12	5.8e-12
chrIV:258632-258620	chrIV;258641;258555	uORF	Scer	N	0.857667	0.883429	0.874667	12	9	65	CCAAAAUGA	AUG	AAGAGAUGA	0.893086	MKR	UGA	CUAGCUCGAA	YDL113C|chrIV;258641;258555|258632,AAG	YDL113C|chrIV;258641;258555|WT	25492;17339;549;409;24;39;254;31;35;25624;3078	40189;5442;392;270;28;32;39;308;22;21357;3369	21928.817,15501.499,501.009,342.405,24.000,29.108,190.793,24.099,26.912	34571.521,4865.284,357.733.226.038,28.000,23.883,29.295,239.434,16.916	559.083	465.982	120.566	131.965	0.216	0.283	0.0484337	0.0279743	-0.791907	0	0	24283;23979;391;182;290;46;29;25;32;23185;3987	34544;8811;213;124;170;39;42;32;28;21916;4613	24147.408,19390.566,391.000,156.516,259.671,41.840,25.057,22.858,26.646	34351.113,7124.996,213.000.106.637,152.221,35.473,36.289,29.259,23.316	496.704	469.518	156.441	181.004	0.315	0.386	0.0443517	0.0253215	-0.808629	0	0
chrIV:267251-267239	chrIV;267257;267201	uORF	Scer	N	0.00166667	0.00385714	0.00666667	12	6	38	AAAAAAUGC	AUG	CUCACCUGA	0.503214	MLT	UGA	CCUUAUUCAC	YDL109C|chrIV;267257;267201|267251,AAG	YDL109C|chrIV;267257;267201|WT	3;4;99;1175;797;677;3;0;3;1051;2711	461;1546;19;1;0;87;0;0;1;903;655	2.581,3.576,90.346,983.683,797.000,505.281,2.253,0.000,2.307	396.563,1382.163,17.339.0.837,0.000,64.933,0.000,0.000,0.769	22.931	19.702	106.191	25.657	4.631	1.302	0.506505	0.0862907	-2.5533	0	0	1;3;41;1542;991;2;0;2;4;1356;2087	1190;803;1;0;1;5;5;4;2;1158;1009	0.994,2.426,41.000,1326.086,887.357,1.819,0.000,1.829,3.331	1183.355,649.344,1.000.0.000,0.895,4.548,4.320,3.657,1.665	29.05	24.808	81.889	39.591	2.819	1.596	0.444822	0.0379393	-3.55146	0	0
chrIV:296377-296350	chrIV;296432;296329	uORF	Scer	N	0.137	0.0603793	0.000666667	27	55	21	UUCUUAUGC	AUG	CAGAAACAACUGCAGUGCUUGUAA	0.688875	MQKQLQCL	UAA	AGCUAUAGGC	YDL090C|chrIV;296432;296329|296377,AAG	YDL090C|chrIV;296432;296329|WT	46;1655;28171;15087;27;44;33;33;33;16212;7197	22498;31554;597;360;22;31;62;33;29;21728;3410	39.570,1479.611,25708.415,12630.489,27.000,32.840,24.788,25.654,25.375	19353.308,28210.064,544.813.301.384,22.000,23.137,46.572,25.654,22.299	353.725	474.077	281.908	133.571	0.797	0.282	0.286622	0.0552424	-2.3753	0	0	48;674;22914;21032;608;304;46;29;316;21488;8537	15876;32418;289;25;39;43;47;40;46;22352;4599	47.732,545.029,22914.000,18087.061,544.413,276.511,39.745,26.516,263.134	15787.351,26214.744,289.000.21.499,34.921,39.112,40.609,36.574,38.304	460.348	478.858	334.973	180.455	0.728	0.377	0.308838	0.0524737	-2.55718	0	0
chrIV:30482-30461	chrIV;30482;30454	uORF	Scer	N	0.000333333	0.0129565	0.0356667	21	0	7	ND-too-cl	AUG	AAUUGGGCUGUCCUUUGA	0.788579	MNWAVL	UGA	AGAGGATATG	YDL238C|chrIV;30482;30454|30482,AAG	YDL238C|chrIV;30482;30454|WT	0;0;0;68;192;0;0;0;0;75;42	0;225;62;1;14;1;0;0;0;97;139	0.000,0.000,0.000,56.928,192.000,0.000,0.000,0.000,0.000	0.000,201.156,56.580.0.837,14.000,0.746,0.000,0.000,0.000	1.636	2.116	1.645	5.445	1.006	2.573	0.514136	0.140506	-1.87152	4.28e-75	6.69e-75	0;1;5;88;85;10;1;0;0;54;208	0;118;72;0;4;0;1;0;0;91;177	0.000,0.809,5.000,75.678,76.110,9.096,0.864,0.000,0.000	0.000,95.420,72.000.0.000,3.582,0.000,0.864,0.000,0.000	1.157	1.95	8.161	6.945	7.054	3.562	0.470899	0.156723	-1.5872	9.14e-51	1.3e-50
chrIV:305187-305202	chrIV;305076;305236	uORF	Scer	Y	0.99	0.989333	0.995667	15	111	34	UCACUUUGG	UUG	GCAAUAGGUUAA	0.835358	MAIG	UAA	AAAAAGCUCG	YDL084W|chrIV;305076;305236|305187,305202,AAG	YDL084W|chrIV;305076;305236|WT	1;2;0;1;99;0;1211;491;810;1274;1341	1;0;0;0;0;2;1700;452;2;639;851	0.860,1.788,0.000,0.837,99.000,0.000,909.647,381.695,622.832	0.860,0.000,0.000.0.000,0.000,1.493,1276.962,351.377,1.538	27.797	13.942	52.527	33.334	1.89	2.391	0.878808	0.842847	-0.0602775	8.61e-58	1.27e-57	1;4;0;0;0;179;1195;1141;973;1145;503	1;2;0;1;0;245;584;142;179;657;160	0.994,3.235,0.000,0.000,0.000,162.814,1032.508,1043.260,810.220	0.994,1.617,0.000.0.860,0.000,222.846,504.590,129.836,149.054	24.53	14.075	19.737	6.278	0.805	0.446	0.904741	0.843481	-0.101149	5.93e-67	8.91e-67
chrIV:310172-310151	chrIV;310188;310122	uORF	Scer	Y	0.999	0.99987	1	21	16	29	CCGCUUUGU	UUG	UCCAAUACAACAGCUUAA	0.886965	MSNTTA	UAA	ACCGAUUAUC	YDL081C|chrIV;310188;310122|310172,310151,AAG	YDL081C|chrIV;310188;310122|WT	7;5;1;1;3;6;5;282;6069;2132;3015	12;638;182;3;6;10;389;1807;7678;3214;6666	6.022,4.470,0.913,0.837,3.000,4.478,3.756,219.222,4666.623	10.323,570.388,166.090.2.512,6.000,7.464,292.199,1404.730,5903.828	46.517	70.125	118.098	261.109	2.539	3.723	0.991641	0.895323	-0.14741	3.16e-127	5.54e-127	8;5;33;4;2;6;9;601;6389;1966;3062	9;895;88;46;8;7;13;519;9577;3104;4945	7.955,4.043,33.000,3.440,1.791,5.457,7.776,549.517,5320.139	8.950,723.740,88.000.39.559,7.163,6.367,11.232,474.542,7974.795	42.119	66.499	120.146	194.031	2.853	2.918	0.985823	0.9127	-0.111188	1.05e-07	1.18e-07
chrIV:326181-oORF	chrIV;326221;326149	oORF	Scer	N	NA	NA	NA	NA	40	NA	UUUUUAUGC	AUG	NA	NA	NA	NA	NA	YDL074C|chrIV;326221;326149|326181,AAG	YDL074C|chrIV;326221;326149|WT	7;5;0;5;959;4749;1765;5;3;2287;3109	2;3;1;283;1569;1307;941;99;2;1790;3369	6.022,4.470,0.000,4.186,959.000,3544.431,1325.787,3.887,2.307	1.720,2.682,0.913.236.921,1569.000,975.484,706.836,76.961,1.538	49.899	39.055	121.78	131.965	2.441	3.379	0.710944	0.646204	-0.137747	6.03e-111	1.02e-110	3;6;5;4;2019;2905;269;3;343;2094;3766	4;3;0;218;3333;1156;3;1;6;1938;2246	2.983,4.852,5.000,3.440,1807.844,2642.317,232.422,2.743,285.617	3.978,2.426,0.000.187.475,2984.421,1051.469,2.592,0.914,4.996	44.861	41.519	147.769	88.128	3.294	2.123	0.670229	0.57959	-0.209622	2.68e-269	5.76e-269
chrIV:345019-344965	chrIV;345034;344953	uORF	Scer	N	0	0.045375	0.000666667	54	15	12	AGCACAUGC	AUG	CUUUGGACCAUUAAAGGGUUACGUAGAGGAGAAGAGCAUAUUUCAGGAUAA	0.691816	MLWTIKGLRRGEEHISG	UAA	ACAGACAAAA	YDL059C|chrIV;345034;344953|345019,AAG	YDL059C|chrIV;345034;344953|WT	12;7;3;8;3;554;3169;5012;1981;3452;1569	6;4;185;5697;1788;39;272;3;7;2919;798	10.323,6.258,2.738,6.697,3.000,413.480,2380.406,3896.240,1523.246	5.161,3.576,168.828.4769.397,1788.000,29.108,204.314,2.332,5.382	75.318	63.689	61.458	31.258	0.816	0.491	0.88144	0.442155	-0.99531	0	0	10;10;2;4;2;994;3949;2260;2184;3442;442	8;9;115;3564;1741;150;11;3;3;2586;689	9.944,8.086,2.000,3.440,1.791,904.118,3412.028,2066.405,1818.623	7.955,7.278,115.000.3064.962,1558.919,136.436,9.504,2.743,2.498	73.74	55.401	17.343	27.035	0.235	0.488	0.881063	0.440126	-1.00133	0	0
chrIV:345019-344965	chrIV;345066;344953	uORF	Scer	N	0	0.045375	0.000666667	54	47	12	AGCACAUGC	AUG	CUUUGGACCAUUAAAGGGUUACGUAGAGGAGAAGAGCAUAUUUCAGGAUAA	0.691816	MLWTIKGLRRGEEHISG	UAA	ACAGACAAAA	YDL059C|chrIV;345066;344953|345019,344965,AAG	YDL059C|chrIV;345066;344953|WT	11;10;5;4511;4866;3703;554;13;9;5290;5228	10;9;3966;8177;846;504;13;6;13;5596;2385	9.462,8.940,4.563,3776.505,4866.000,2763.746,416.139,10.106,6.920	8.602,8.046,3619.310.6845.596,846.000,376.162,9.765,4.664,9.996	115.421	122.097	204.782	93.421	1.774	0.765	0.546563	0.367928	-0.570966	0	0	9;10;6;3188;6764;2351;605;7;435;5844;5751	17;51;4628;9833;1638;10;12;2;476;6012;3489	8.950,8.086,6.000,2741.610,6056.592,2138.412,522.734,6.400,362.226	16.905,41.241,4628.000.8456.165,1466.691,9.096,10.368,1.829,396.367	125.199	128.798	225.656	136.901	1.802	1.063	0.563786	0.368915	-0.611861	0	0
chrIV:352853-352859	chrIV;352761;352876	uORF	Scer	N	0.254	0.249333	0.249333	6	92	17	ACACAACGU	ACG	UAA	1	M	UAA	AUCCCAGAAA	YDL056W|chrIV;352761;352876|352853,352859,AAG	YDL056W|chrIV;352761;352876|WT	41;19;24;14;343;7846;28205;7485;2217;11472;6151	29;16;115;174;1705;8788;11291;1269;1531;7929;4497	35.269,16.986,21.902,11.720,343.000,5855.887,21186.294,5818.707,1704.713	24.946,14.304,104.947.145.669,1705.000,6558.952,8481.278,986.498,1177.229	250.304	173.001	240.936	176.149	0.963	1.018	0.824297	0.770378	-0.0975978	0	0	30;27;11;67;495;10426;21798;7021;1140;10872;6423	25;251;991;11;1364;10540;9167;2443;1694;9989;6217	29.832,21.833,11.000,57.619,443.231,9483.235,18833.980,6419.571,949.281	24.860,202.971,991.000.9.460,1221.347,9586.927,7920.502,2233.729,1410.599	232.916	213.999	252.024	243.941	1.082	1.14	0.819905	0.755975	-0.117118	0	0
chrIV:36515-oORF	chrIV;36579;36477	oORF	Scer	Y	NA	NA	NA	NA	64	NA	ACAAAUUGG	UUG	NA	NA	NA	NA	NA	YDL234C|chrIV;36579;36477|36515,36476,AAG	YDL234C|chrIV;36579;36477|WT	14;6;12;8;92;461;7099;7062;8353;6229;5452	14;8;7;13;13;2430;9309;11828;680;5141;5563	12.043,5.364,10.951,6.697,92.000,344.069,5332.441,5489.874,6422.855	12.043,7.152,6.388.10.883,13.000,1813.638,6992.491,9194.878,522.871	135.909	112.17	213.556	217.904	1.571	1.943	0.905146	0.851464	-0.0882049	0	0	18;9;9;232;8;1074;6869;6593;8122;7039;7684	15;5;6;4;17;1672;5600;6629;6007;5250;5511	17.899,7.278,9.000,199.515,7.163,976.884,5934.976,6028.234,6763.213	14.916,4.043,6.000.3.440,15.222,1520.810,4838.531,6061.150,5002.046	150.8	112.473	301.503	216.239	1.999	1.923	0.908771	0.903714	-0.00804984	1.16e-15	1.39e-15
chrIV:384113-384086	chrIV;384153;384081	uORF	Scer	N	0.004	0.177103	0.384333	27	40	5	AUCGGAUGA	AUG	AUCCACACGCCUCAUCAAGUUUAG	0.746717	MIHTPHQV	UAG	CGGCTATGAG	YDL039C|chrIV;384153;384081|384113,AAG	YDL039C|chrIV;384153;384081|WT	8;6;8;174;4669;4926;1723;10;8;5159;3347	9;527;6959;2601;5;646;53;11;2;5464;1584	6.882,5.364,7.301,145.669,4669.000,3676.536,1294.238,7.774,6.151	7.742,471.151,6350.675.2177.497,5.000,482.144,39.811,8.551,1.538	112.563	119.217	131.103	62.046	1.165	0.52	0.645257	0.297028	-1.11927	0	0	17;11;5;118;6903;3241;3264;8;12;5080;4352	9;908;6262;2646;6;658;8;8;10;5282;1928	16.905,8.895,5.000,101.477,6181.055,2947.934,2820.172,7.315,9.992	8.950,734.252,6262.000.2275.502,5.372,598.501,6.912,7.315,8.327	108.831	113.159	170.763	75.65	1.569	0.669	0.652682	0.28849	-1.17786	0	0
chrIV:385619-oORF	chrIV;385765;385587	oORF	Scer	N	NA	NA	NA	NA	146	NA	UAUCAAUGG	AUG	NA	NA	NA	NA	NA	YDL037C|chrIV;385765;385587|385619,AAG	YDL037C|chrIV;385765;385587|WT	2229;441;2;1;3;4;6;2;2;1789;0	3105;4;2;1;0;3;2;3;2;2298;0	1917.438,394.265,1.825,0.837,3.000,2.985,4.507,1.555,1.538	2670.994,3.576,1.825.0.837,0.000,2.239,1.502,2.332,1.538	39.034	50.139	0	0	0	0	0.0255291	0.012012	-1.08767	1.85e-25	2.39e-25	3139;279;2;208;44;4;4;1;2;1761;381	3855;781;2;2;0;2;1;2;2;3198;393	3121.472,225.613,2.000,178.875,39.398,3.638,3.456,0.914,1.665	3833.474,631.554,2.000.1.720,0.000,1.819,0.864,1.829,1.665	37.727	68.512	14.95	15.42	0.396	0.225	0.0393324	0.0185705	-1.0827	0.6062	0.616183
chrIV:385676-385664	chrIV;385765;385587	uORF	Scer	N	0.005	0.00485714	0.00233333	12	89	77	AAUUGAUGA	AUG	ACAAGGUGA	0.738438	MTR	UGA	GCCCUUCAUU	YDL037C|chrIV;385765;385587|385676,AAG	YDL037C|chrIV;385765;385587|WT	3346;1149;46;2;2;0;3;5;2;1420;62	3105;4;2;1;0;3;2;3;2;2298;0	2878.308,1027.235,41.979,1.674,2.000,0.000,2.253,3.887,1.538	2670.994,3.576,1.825.0.837,0.000,2.239,1.502,2.332,1.538	30.983	50.139	2.429	0	0.078	0	0.0311911	0.012012	-1.37666	7.24e-76	1.14e-75	2652;60;0;21;3;1;4;5;0;1582;0	3855;781;2;2;0;2;1;2;2;3198;393	2637.192,48.519,0.000,18.060,2.686,0.910,3.456,4.572,0.000	3833.474,631.554,2.000.1.720,0.000,1.819,0.864,1.829,1.665	33.892	68.512	0	15.42	0	0.225	0.0154585	0.0185705	0.26461	1.17e-15	1.39e-15
chrIV:391685-391715	chrIV;391659;391782	uORF	Scer	N	0.999333	0.616233	0.161	30	26	67	AAAAAAUGC	AUG	CAGGUGUUGCAUACACACUAUUAUUAA	0.78585	MQVLHTHYY	UAA	UAAGGAUAAU	YDL034W|chrIV;391659;391782|391685,AAG	YDL034W|chrIV;391659;391782|WT	3474;1;2;1;4;4;491;0;3;1585;0	2732;1;1;0;0;1;1;0;1;1199;0	2988.416,0.894,1.825,0.837,4.000,2.985,368.817,0.000,2.307	2350.131,0.894,0.913.0.000,0.000,0.746,0.751,0.000,0.769	34.583	26.161	0	0	0	0	0.100989	0.00967238	-3.38418	5.5e-13	6.62e-13	3919;626;3;2;3;1;3;2;2;2004;5	1301;1;0;0;1;0;3;3;6;407;0	3897.117,506.214,3.000,1.720,2.686,0.910,2.592,1.829,1.665	1293.735,0.809,0.000.0.000,0.895,0.000,2.592,2.743,4.996	42.933	8.719	0.196	0	0.005	0	0.0175475	0.0162191	-0.113572	3.37e-09	3.85e-09
chrIV:391726-391735	chrIV;391659;391782	uORF	Scer	N	0.909667	0.995222	0.999667	9	67	47	UAAUCAUGG	AUG	GGAUAA	0.703211	MG	UAA	AUCAUCAGAA	YDL034W|chrIV;391659;391782|391726,AAG	YDL034W|chrIV;391659;391782|WT	3520;0;1;353;3;2;4;1;2;1862;0	2732;1;1;0;0;1;1;0;1;1199;0	3027.987,0.000,0.913,295.523,3.000,1.493,3.005,0.777,1.538	2350.131,0.894,0.913.0.000,0.000,0.746,0.751,0.000,0.769	40.626	26.161	0	0	0	0	0.0452773	0.00967238	-2.22684	5.26e-09	6.12e-09	3083;559;1;1;0;4;6;1;1;1893;32	1301;1;0;0;1;0;3;3;6;407;0	3065.785,452.034,1.000,0.860,0.000,3.638,5.184,0.914,0.833	1293.735,0.809,0.000.0.000,0.895,0.000,2.592,2.743,4.996	40.555	8.719	1.256	0	0.031	0	0.0190575	0.0162191	-0.232662	8.69e-11	1e-10
chrIV:391778-oORF	chrIV;391659;391782	oORF	Scer	N	NA	NA	NA	NA	119	NA	CAAAAAUGC	AUG	NA	NA	NA	NA	NA	YDL034W|chrIV;391659;391782|391778,AAG	YDL034W|chrIV;391659;391782|WT	2934;705;2;2;3;0;2;0;2;1013;0	2732;1;1;0;0;1;1;0;1;1199;0	2523.896,630.288,1.825,1.674,3.000,0.000,1.502,0.000,1.538	2350.131,0.894,0.913.0.000,0.000,0.746,0.751,0.000,0.769	22.102	26.161	0	0	0	0	0.0242035	0.00967238	-1.32327	2.48e-37	3.41e-37	2420;3;3;0;1;1;2;0;1;1065;175	1301;1;0;0;1;0;3;3;6;407;0	2406.487,2.426,3.000,0.000,0.895,0.910,1.728,0.000,0.833	1293.735,0.809,0.000.0.000,0.895,0.000,2.592,2.743,4.996	22.816	8.719	6.867	0	0.301	0	0.0100068	0.0162191	0.696722	0.80016	0.807183
chrIV:404971-oORF	chrIV;404990;404957	oORF	Scer	N	NA	NA	NA	NA	19	NA	CACAUAUGA	AUG	NA	NA	NA	NA	NA	YDL027C|chrIV;404990;404957|404971,AAG	YDL027C|chrIV;404990;404957|WT	0;1;0;1;0;88;0;0;83;52;136	0;156;21;0;1;0;0;0;2;56;125	0.000,0.894,0.000,0.837,0.000,65.679,0.000,0.000,63.821	0.000,139.468,19.164.0.000,1.000,0.000,0.000,0.000,1.538	1.135	1.222	5.327	4.896	4.693	4.007	0.844312	0.113993	-2.88883	6.42e-47	9.17e-47	0;0;0;0;0;13;0;22;22;85;109	0;120;137;10;0;0;0;1;0;195;170	0.000,0.000,0.000,0.000,0.000,11.824,0.000,20.115,18.319	0.000,97.038,137.000.8.600,0.000,0.000,0.000,0.914,0.000	1.821	4.178	4.277	6.67	2.349	1.596	0.903388	0.179733	-2.32949	1.5e-29	1.94e-29
chrIV:410153-410144	chrIV;410200;410056	uORF	Scer	N	0.0496667	0.0281818	0.000333333	9	47	88	CGAUAAUGC	AUG	CAUUAG	1	MH	UAG	UGCUACCUUA	YDL022C-A|chrIV;410200;410056|410153,AAG	YDL022C-A|chrIV;410200;410056|WT	2;1473;0;1;3;0;2;0;0;847;337	399;0;0;1;0;0;0;0;0;405;0	1.720,1316.899,0.000,0.837,3.000,0.000,1.502,0.000,0.000	343.229,0.000,0.000.0.837,0.000,0.000,0.000,0.000,0.000	18.48	8.837	13.2	0	0.714	0	0.0789746	0.00957996	-3.0433	6.2e-178	1.18e-177	0;1764;0;0;0;4;2;1;4;894;22	638;928;1;1;0;0;0;0;0;281;50	0.000,1426.455,0.000,0.000,0.000,3.638,1.728,0.914,3.331	634.438,750.425,1.000.0.860,0.000,0.000,0.000,0.000,0.000	19.153	6.02	0.863	1.962	0.045	0.326	0.0774444	0.0428651	-0.853356	3.7e-99	6.04e-99
chrIV:410171-410144	chrIV;410200;410056	uORF	Scer	N	0.001	0.0295862	0.000333333	27	29	88	UGUGAAUGG	AUG	GUUACAUCAUCGAUAAUGCAUUAG	0.799102	MVTSSIMH	UAG	UGCUACCUUA	YDL022C-A|chrIV;410200;410056|410171,AAG	YDL022C-A|chrIV;410200;410056|WT	3280;3315;4;3;4;2;3;3;7;2547;189	399;0;0;1;0;0;0;0;0;405;0	2821.533,2963.693,3.650,2.512,4.000,1.493,2.253,2.332,5.382	343.229,0.000,0.000.0.837,0.000,0.000,0.000,0.000,0.000	55.572	8.837	7.403	0	0.133	0	0.0460211	0.00957996	-2.2642	3.22e-57	4.75e-57	3482;2403;43;3;3;7;4;4;2;2251;255	638;928;1;1;0;0;0;0;0;281;50	3462.557,1943.181,43.000,2.580,2.686,6.367,3.456,3.657,1.665	634.438,750.425,1.000.0.860,0.000,0.000,0.000,0.000,0.000	48.224	6.02	10.006	1.962	0.207	0.326	0.0353721	0.0428651	0.277192	1.41e-22	1.76e-22
chrIV:42280-42253	chrIV;42280;42244	uORF	Scer	N	0.965	0.759724	0.224333	27	0	9	ND-too-cl	AUG	UACAGUAUAGUGCUGGAAUUGUAA	0.701091	MYSIVLEL	UAA	CAGGTCCTCA	YDL231C|chrIV;42280;42244|42280,AAG	YDL231C|chrIV;42280;42244|WT	0;37;7;0;181;345;212;69;35;270;542	84;207;2;0;0;1;0;1;1;272;63	0.000,33.079,6.388,0.000,181.000,257.492,159.245,53.639,26.912	72.259,185.063,1.825.0.000,0.000,0.746,0.000,0.777,0.769	5.891	5.935	21.23	2.468	3.604	0.416	0.687204	0.0677966	-3.34145	3.21e-115	5.47e-115	0;0;1;0;120;249;88;2;0;263;640	91;363;8;1;0;0;0;0;1;171;218	0.000,0.000,1.000,0.000,107.450,226.484,76.034,1.829,0.000	90.492,293.539,8.000.0.860,0.000,0.000,0.000,0.000,0.833	5.634	3.663	25.112	8.554	4.457	2.335	0.688931	0.0637526	-3.4338	7.56e-133	1.33e-132
chrIV:42280-42253	chrIV;42355;42244	uORF	Scer	N	0.965	0.759724	0.224333	27	75	9	AAAGCAUGU	AUG	UACAGUAUAGUGCUGGAAUUGUAA	0.701091	MYSIVLEL	UAA	CAGGTCCTCA	YDL231C|chrIV;42355;42244|42280,42253,AAG	YDL231C|chrIV;42355;42244|WT	19;361;1297;12551;8358;2035;22;10;23;10986;3887	16792;4921;5;551;28;17;17;14;14;11286;618	16.344,322.743,1183.622,10507.409,8358.000,1518.829,16.525,7.774,17.685	14444.872,4399.497,4.563.461.285,28.000,12.688,12.770,10.883,10.765	239.7	246.246	152.255	24.207	0.635	0.098	0.461768	0.0359045	-3.68493	0	0	18;20;218;12724;13074;1137;651;9;20;13445;5124	11927;4993;221;8;9;186;18;13;12;12022;840	17.899,16.173,218.000,10942.362,11706.666,1034.187,562.479,8.229,16.654	11860.402,4037.578,221.000.6.880,8.059,169.181,15.552,11.886,9.992	288.039	257.553	201.054	32.96	0.698	0.128	0.483664	0.0365677	-3.72536	0	0
chrIV:433310-oORF	chrIV;433345;433248	oORF	Scer	N	NA	NA	NA	NA	35	NA	AGUGCAUGG	AUG	NA	NA	NA	NA	NA	YDL009C|chrIV;433345;433248|433310,AAG	YDL009C|chrIV;433345;433248|WT	2;4;1992;1;1;1;1;0;3;1103;258	173;4635;504;3;3;1;8;2;5;1819;1473	1.720,3.576,1817.868,0.837,1.000,0.746,0.751,0.000,2.307	148.819,4143.806,459.943.2.512,3.000,0.746,6.009,1.555,3.845	24.066	39.688	10.106	57.698	0.42	1.454	0.247354	0.0934351	-1.40454	0	0	1;0;1923;127;1;1;2;2;0;906;340	4;3109;214;2;4;3;4;3;0;2084;1351	0.994,0.000,1923.000,109.217,0.895,0.910,1.728,1.829,0.000	3.978,2514.086,214.000.1.720,3.582,2.729,3.456,2.743,0.000	19.41	44.647	13.341	53.01	0.687	1.187	0.247331	0.0880317	-1.49034	0	0
chrIV:447620-447581	chrIV;447663;447578	uORF	Scer	Y	0.979667	0.974683	0.990667	39	43	3	AUUGGAUGA	AUG	AGAAGCAGCCAGGAUAUAGGUAAUAGUAACACAUAA	0.719906	MRSSQDIGNSNT	UAA	GAAATGAGAT	YDL002C|chrIV;447663;447578|447620,447581,AAG	YDL002C|chrIV;447663;447578|WT	16;12;9;8;6;13;1984;4430;8547;6070;5962	23;19;5;175;1013;10208;8655;4318;813;6732;4046	13.764,10.728,8.213,6.697,6.000,9.703,1490.289,3443.804,6572.027	19.785,16.986,4.563.146.506,1013.000,7618.774,6501.236,3356.737,625.138	132.44	146.884	233.533	158.483	1.763	1.079	0.941789	0.779789	-0.272321	0	0	16;15;4;5;285;13;1475;6143;12690;6077;4333	22;15;112;80;2794;2617;10671;1622;1578;7195;3557	15.911,12.130,4.000,4.300,255.193,11.824,1274.434,5616.782,10567.000	21.877,12.130,112.000.68.798,2501.792,2380.359,9219.993,1483.057,1314.005	130.191	154.142	170.017	139.569	1.306	0.905	0.957349	0.791855	-0.273809	0	0
chrIV:454766-oORF	chrIV;454763;454781	oORF	Scer	N	NA	NA	NA	NA	3	NA	ND-too-cl	AUG	NA	NA	NA	NA	NA	YDR003W-A|chrIV;454763;454781|454766,AAG	YDR003W-A|chrIV;454763;454781|WT	0;0;0;0;1;12;87;0;1;41;47	0;0;141;24;1;0;1;1;0;124;184	0.000,0.000,0.000,0.000,1.000,8.956,65.350,0.000,0.769	0.000,0.000,128.674.20.092,1.000,0.000,0.751,0.777,0.000	0.895	2.706	1.841	7.207	2.057	2.663	0.811821	0.27735	-1.54946	3.95e-34	5.35e-34	1;0;0;0;0;26;84;56;11;37;184	0;141;242;43;0;0;0;0;1;120;176	0.994,0.000,0.000,0.000,0.000,23.649,72.578,51.203,9.160	0.000,114.019,242.000.36.979,0.000,0.000,0.000,0.000,0.833	0.793	2.571	7.22	6.906	9.105	2.686	0.854117	0.204966	-2.05905	1.24e-73	1.9e-73
chrIV:461315-461249	chrIV;461353;461247	uORF	Scer	N	0.995333	0.763971	0.915	66	38	2	CGCGUAUAC	AUA	CGUUCAUUCAAGACUUAUUUUCAGCCAGUAAUAUUCCCUACUCCUCUUCCGUUUUCAGAAUAG	0.713522	MRSFKTYFQPVIFPTPLPFSE	UAG	AGATGAGATC	YDR006C|chrIV;461353;461247|461315,461249,AAG	YDR006C|chrIV;461353;461247|WT	39;40;354;536;4785;22690;18017;7542;728;14447;3133	40;33;180;322;4879;23309;14204;2440;1204;12629;3133	33.549,35.761,323.055,448.727,4785.000,16934.754,13533.539,5863.018,559.779	34.409,29.503,164.265.269.571,4879.000,17396.747,10669.389,1896.813,925.789	315.215	275.548	122.72	122.72	0.389	0.445	0.751788	0.736045	-0.0305318	9.12e-153	1.67e-152	44;31;99;18;3901;11008;22619;3159;3172;12407;3366	36;35;12;263;11356;18192;6277;1178;33;12297;2317	43.754,25.068,99.000,15.480,3493.017,10012.608,19543.344,2888.396,2641.334	35.799,28.303,12.000.226.174,10168.342,16546.999,5423.474,1077.091,27.479	265.801	263.445	132.074	90.914	0.497	0.345	0.794072	0.683755	-0.21579	0	0
chrIV:497375-497351	chrIV;497441;497318	uORF	Scer	Y	0.150333	0.0821923	0.0553333	24	66	33	GCAGUAUUG	AUU	GAUAUCCUAAAGCAGUAUUAA	0.713482	MDILKQY	UAA	AACAAUUUAA	YDR027C|chrIV;497441;497318|497375,497351,AAG	YDR027C|chrIV;497441;497318|WT	60;437;9305;44786;14517;2264;65;39;46;30352;8495	322;692;5632;44559;26342;5744;2942;49;53;32760;12114	51.613,390.689,8491.598,37493.809,14517.000,1689.744,48.825,30.318,35.371	276.992,618.665,5139.675.37303.770,26342.000,4287.053,2209.895,38.092,40.753	662.241	714.781	332.751	474.508	0.502	0.664	0.41493	0.463272	0.158991	0	0	47;75;6044;40696;20590;2399;1732;26;560;31528;12001	71;268;3608;41687;22793;3805;551;42;50;37482;11409	46.738,60.649,6044.000,34997.671,18436.611,2182.072,1496.488,23.773,466.314	70.604,216.718,3608.000.35849.910,20409.212,3460.935,476.077,38.402,41.635	675.44	802.996	470.892	447.664	0.697	0.557	0.441721	0.446173	0.0144676	4.63e-39	6.22e-39
chrIV:520739-520733	chrIV;520805;520692	uORF	Scer	N	0.998	0.9955	0.997667	6	66	41	UAGGUAUGU	AUG	UAG	1	M	UAG	AUAUACUAGA	YDR034C-A|chrIV;520805;520692|520739,AAG	YDR034C-A|chrIV;520805;520692|WT	4;4021;132;89;4;149;5;1;2;2879;449	5147;2;0;118;0;2;1;3;2;1070;102	3.441,3594.874,120.461,74.509,4.000,111.207,3.756,0.777,1.538	4427.570,1.788,0.000.98.787,0.000,1.493,0.751,2.332,1.538	62.816	23.346	17.587	3.995	0.28	0.171	0.107655	0.018337	-2.55358	0	0	3;3816;388;317;5;1;2;4;2;2863;485	2009;1793;2;2;2;1;2;3;1;1006;0	2.983,3085.800,388.000,272.613,4.477,0.910,1.728,3.657,1.665	1997.782,1449.906,2.000.1.720,1.791,0.910,1.728,2.743,0.833	61.336	21.552	19.03	0	0.31	0	0.113655	0.0370233	-1.61816	0	0
chrIV:520785-520779	chrIV;520805;520692	uORF	Scer	N	0.0523333	0.157625	0.365333	6	20	87	UUCUGAUGU	AUG	UAA	1	M	UAA	UUGUUGGGAU	YDR034C-A|chrIV;520805;520692|520785,AAG	YDR034C-A|chrIV;520805;520692|WT	5351;0;0;0;1;4;8;0;2;2346;427	5147;2;0;118;0;2;1;3;2;1070;102	4603.056,0.000,0.000,0.000,1.000,2.985,6.009,0.000,1.538	4427.570,1.788,0.000.98.787,0.000,1.493,0.751,2.332,1.538	51.187	23.346	16.726	3.995	0.327	0.171	0.0108419	0.018337	0.758142	0.0829	0.0873	2392;399;0;1;4;3;2;2;2;1197;1	2009;1793;2;2;2;1;2;3;1;1006;0	2378.644,322.650,0.000,0.860,3.582,2.729,1.728,1.829,1.665	1997.782,1449.906,2.000.1.720,1.791,0.910,1.728,2.743,0.833	25.644	21.552	0.039	0	0.002	0	0.019213	0.0370233	0.946349	1.22e-89	1.95e-89
chrIV:530745-530706	chrIV;530807;530697	uORF	Scer	Y	0.168667	0.076561	0.042	39	62	9	AACGUAUGU	AUG	UACUCACUGAGGAAAAAUCUUUGUACACAUAAUUGA	0.774234	MYSLRKNLCTHN	UGA	AAATTTTCGA	YDR038C|chrIV;530807;530697|530745,530706,AAG	YDR038C|chrIV;530807;530697|WT	16;11;4;5;10;835;2482;9045;3684;4870;779	6;4;2559;5775;1584;6;448;8;3;2898;1298	13.764,9.834,3.650,4.186,10.000,623.205,1864.364,7031.423,2832.730	5.161,3.576,2335.303.4834.697,1584.000,4.478,336.517,6.219,2.307	106.257	63.231	30.514	50.843	0.287	0.804	0.894762	0.397571	-1.17029	0	0	15;12;2;121;417;886;2755;6092;925;4901;2100	7;196;773;2975;1246;5;5;5;6;3489;318	14.916,9.704,2.000,104.057,373.388,805.884,2380.384,5570.151,770.250	6.961,158.495,773.000.2558.435,1115.688,4.548,4.320,4.572,4.996	104.997	74.747	82.399	12.478	0.785	0.167	0.873138	0.388151	-1.16959	0	0
chrIV:550629-oORF	chrIV;550666;550576	oORF	Scer	Y	NA	NA	NA	NA	37	NA	UAUUGAUGG	AUG	NA	NA	NA	NA	NA	YDR046C|chrIV;550666;550576|550629,550576,AAG	YDR046C|chrIV;550666;550576|WT	32;25;47;286;449;8151;18815;8462;763;11449;7020	21;15;193;9503;7037;22;184;15;11;8014;3719	27.527,22.351,42.891,239.433,449.000,6083.525,14132.959,6578.209,586.692	18.065,13.410,176.129.7955.693,7037.000,16.420,138.212,11.661,8.458	249.802	174.855	274.975	145.674	1.101	0.833	0.811721	0.466179	-0.800099	0	0	35;19;10;13;951;4899;17430;6858;585;12016;6345	17;11;545;8353;6723;847;317;12;10;5642;3454	34.805,15.364,10.000,11.180,851.540,4456.011,15059.927,6270.534,487.131	16.905,8.895,545.000.7183.398,6019.880,770.411,273.895,10.972,8.327	257.425	120.871	248.964	135.527	0.967	1.121	0.830967	0.468872	-0.825599	0	0
chrIV:553164-553239	chrIV;553161;553253	uORF	Scer	N	0.0986667	0.0125867	0.00366667	75	3	14	ND-too-cl	AUG	AAAAUAAAUGAGAAUGCAUAUCACCUUUCCUUCGAAGAAAAAGGAUUUUCAAAAGAUCUGCACGCCUGUUGA	0.755166	MKINENAYHLSFEEKGFSKDLHAC	UGA	CAAGCUUCCA	YDR049W|chrIV;553161;553253|553164,AAG	YDR049W|chrIV;553161;553253|WT	884;205;2;0;1;1;2;1;0;1062;1	5066;381;3;3;183;4;3;2;2;2666;500	760.438,183.275,1.825,0.000,1.000,0.746,1.502,0.777,0.000	4357.892,340.624,2.738.2.512,183.000,2.985,2.253,1.555,1.538	23.171	58.169	0.039	19.585	0.002	0.337	0.0265886	0.035642	0.422768	4.13e-05	4.62e-05	1910;632;55;1;0;4;0;1;0;554;314	3385;2540;82;3;128;3;5;2;4;3435;515	1899.335,511.065,55.000,0.860,0.000,3.638,0.000,0.914,0.000	3366.099,2053.965,82.000.2.580,114.613,2.729,4.320,1.829,3.331	11.869	73.59	12.321	20.207	1.038	0.275	0.0279382	0.0478176	0.775304	3.34e-34	4.4e-34
chrIV:553180-oORF	chrIV;553161;553253	oORF	Scer	N	NA	NA	NA	NA	19	NA	UGAGAAUGC	AUG	NA	NA	NA	NA	NA	YDR049W|chrIV;553161;553253|553180,AAG	YDR049W|chrIV;553161;553253|WT	5145;1431;6;6;0;2;4;3;6;2884;857	5066;381;3;3;183;4;3;2;2;2666;500	4425.850,1279.350,5.476,5.023,0.000,1.493,3.005,2.332,4.614	4357.892,340.624,2.738.2.512,183.000,2.985,2.253,1.555,1.538	62.925	58.169	33.569	19.585	0.533	0.337	0.0264069	0.035642	0.432663	4.08e-22	5.18e-22	4434;5400;6;4;3;6;7;2;7;3269;456	3385;2540;82;3;128;3;5;2;4;3435;515	4409.241,4366.698,6.000,3.440,2.686,5.457,6.048,1.829,5.829	3366.099,2053.965,82.000.2.580,114.613,2.729,4.320,1.829,3.331	70.033	73.59	17.892	20.207	0.255	0.275	0.0419594	0.0478176	0.188548	6.5e-16	7.8e-16
chrIV:587730-oORF	chrIV;587782;587719	oORF	Scer	N	NA	NA	NA	NA	52	NA	GAUACAUGC	AUG	NA	NA	NA	NA	NA	YDR069C|chrIV;587782;587719|587730,AAG	YDR069C|chrIV;587782;587719|WT	153;15;2;5;45;30;262;962;10767;4759;4882	8;17;5180;3168;510;13;13;9;5;4323;2791	131.614,13.410,1.825,4.186,45.000,22.391,196.802,747.842,8279.047	6.882,15.198,4727.187.2652.177,510.000,9.703,9.765,6.996,3.845	103.835	94.322	191.229	109.324	1.842	1.159	0.969148	0.315203	-1.62044	0	0	12;17;7;36;7;6;1091;2400;14894;4109;6488	7;11;5507;4448;608;67;12;3;7;4004;2376	11.933,13.747,7.000,30.959,6.268,5.457,942.649,2194.413,12402.277	6.961,8.895,5507.000.3825.183,544.413,60.942,10.368,2.743,5.829	88.029	85.78	254.575	93.229	2.892	1.087	0.97685	0.313676	-1.63886	0	0
chrIV:589423-589411	chrIV;589465;589402	uORF	Scer	Y	0.0173333	0.1655	0.482333	12	42	9	ACAUUACGA	ACG	AUUAAAUAA	1	MIK	UAA	AAAGTTAAAA	YDR071C|chrIV;589465;589402|589423,589411,AAG	YDR071C|chrIV;589465;589402|WT	1;1;78;0;1;2;0;602;1029;250;338	0;1;1;1;1;144;253;111;102;290;184	0.860,0.894,71.182,0.000,1.000,1.493,0.000,467.984,791.227	0.000,0.894,0.913.0.837,1.000,107.475,190.042,86.289,78.431	5.455	6.327	13.24	7.207	2.427	1.139	0.918345	0.837739	-0.132536	2.83e-84	4.51e-84	0;0;1;0;2;0;325;579;840;386;251	0;0;0;0;0;0;575;503;717;394;227	0.000,0.000,1.000,0.000,1.791,0.000,280.808,529.402,699.470	0.000,0.000,0.000.0.000,0.000,0.000,496.813,459.912,597.048	8.269	8.441	9.849	8.907	1.191	1.055	0.943968	0.928138	-0.0243988	1.88e-10	2.17e-10
chrIV:591385-591367	chrIV;591470;591344	uORF	Scer	N	0.043	0.0511	0.000333333	18	85	23	CAUUUCUGC	CUG	CUAAGAAUCACCUAA	0.707744	MLRIT	UAA	AGUCUUUCAA	YDR072C|chrIV;591470;591344|591385,591367,AAG	YDR072C|chrIV;591470;591344|WT	27;16;25;265;801;15439;17342;4432;1103;8922;7612	40;36;22;138;3808;19258;20097;4319;1123;17184;11723	23.226,14.304,22.815,221.852,801.000,11522.947,13026.510,3445.359,848.127	34.409,32.185,20.077.115.530,3808.000,14373.270,15095.938,3357.514,863.506	194.667	374.933	298.164	459.193	1.532	1.225	0.784221	0.763091	-0.0394051	7.68e-114	1.3e-113	19;30;239;7;1734;7683;17809;5087;17;9579;8857	39;46;13;27;4354;15802;15600;3739;896;17051;14895	18.894,24.259,239.000,6.020,1552.651,6988.269,15387.391,4651.240,14.156	38.782,37.198,13.000.23.219,3898.640,14373.113,13478.764,3418.712,746.102	205.216	365.292	347.529	584.447	1.693	1.6	0.800646	0.764993	-0.0657171	0	0
chrIV:591401-591350	chrIV;591470;591344	uORF	Scer	Y	0.002	0.038566	0.138	51	69	6	ACCGGUUGG	UUG	GACGUUAUCAUUUCUGCUAAGAAUCACCUAAAGUCUUUCAACGUCUAA	0.752582	MDVIISAKNHLKSFNV	UAA	GAAAGCATGA	YDR072C|chrIV;591470;591344|591401,591350,AAG	YDR072C|chrIV;591470;591344|WT	45;33;83;587;1667;12931;34124;14047;6931;18479;11317	40;36;22;138;3808;19258;20097;4319;1123;17184;11723	38.710,29.503,75.745,491.423,1667.000,9651.093,25632.373,10919.890,5329.439	34.409,32.185,20.077.115.530,3808.000,14373.270,15095.938,3357.514,863.506	403.188	374.933	443.29	459.193	1.099	1.225	0.823518	0.763091	-0.109944	0	0	35;39;119;17;3299;7449;24651;5669;1435;18622;14258	39;46;13;27;4354;15802;15600;3739;896;17051;14895	34.805,31.537,119.000,14.620,2953.977,6775.429,21299.039,5183.385,1194.929	38.782,37.198,13.000.23.219,3898.640,14373.113,13478.764,3418.712,746.102	398.949	365.292	559.452	584.447	1.402	1.6	0.807437	0.764993	-0.0779026	0	0
chrIV:591433-591421	chrIV;591470;591344	uORF	Scer	Y	0.0683333	0.0496429	0.00733333	12	37	77	UUUCAUUGC	UUG	CCACCCUAA	0.728896	MPP	UAA	CUGUUCCUUU	YDR072C|chrIV;591470;591344|591433,591421,AAG	YDR072C|chrIV;591470;591344|WT	22;24;227;4468;20367;15905;2528;948;22;14778;12994	40;36;22;138;3808;19258;20097;4319;1123;17184;11723	18.925,21.457,207.157,3740.507,20367.000,11870.748,1898.917,736.958,16.916	34.409,32.185,20.077.115.530,3808.000,14373.270,15095.938,3357.514,863.506	322.437	374.933	508.978	459.193	1.579	1.225	0.60263	0.763091	0.340583	0	0	45;31;75;5201;19812;12208;3497;19;28;14047;14237	39;46;13;27;4354;15802;15600;3739;896;17051;14895	44.749,25.068,75.000,4472.746,17739.977,11104.099,3021.490,17.372,23.316	38.782,37.198,13.000.23.219,3898.640,14373.113,13478.764,3418.712,746.102	300.936	365.292	558.628	584.447	1.856	1.6	0.598596	0.764993	0.353864	0	0
chrIV:591434-591350	chrIV;591470;591344	uORF	Scer	N	0.0586667	0.0326744	0.138	84	36	6	UUUUCAUUG	AUU	GCCACCCUAACUGUUCCUUUAUUUCACCGGUUGGACGUUAUCAUUUCUGCUAAGAAUCACCUAAAGUCUUUCAACGUCUAA	0.702512	MATLTVPLFHRLDVIISAKNHLKSFNV	UAA	GAAAGCATGA	YDR072C|chrIV;591470;591344|591434,591350,AAG	YDR072C|chrIV;591470;591344|WT	26;1122;423;12632;14214;6590;1450;19;25;11182;9869	40;36;22;138;3808;19258;20097;4319;1123;17184;11723	22.366,1003.096,386.023,10575.220,14214.000,4918.468,1089.173,14.770,19.223	34.409,32.185,20.077.115.530,3808.000,14373.270,15095.938,3357.514,863.506	243.977	374.933	386.571	459.193	1.584	1.225	0.513668	0.763091	0.571019	0	0	15;332;960;11947;12307;2662;2782;15;18;12285;8927	39;46;13;27;4354;15802;15600;3739;896;17051;14895	14.916,268.471,960.000,10274.159,11019.882,2421.290,2403.713,13.715,14.989	38.782,37.198,13.000.23.219,3898.640,14373.113,13478.764,3418.712,746.102	263.188	365.292	350.276	584.447	1.331	1.6	0.509523	0.764993	0.586299	0	0
chrIV:592393-592405	chrIV;592368;592438	uORF	Scer	N	0.00133333	0.0124167	0.00966667	12	25	33	AUUCAAUGU	AUG	UGCAUAUAA	0.716833	MCI	UAA	GCAAAACACA	YDR073W|chrIV;592368;592438|592393,AAG	YDR073W|chrIV;592368;592438|WT	4;1;2;43;554;793;449;150;0;1006;157	1;2;1023;972;67;1;3;1;0;646;241	3.441,0.894,1.825,35.999,554.000,591.858,337.268,116.607,0.000	0.860,1.788,933.574.813.736,67.000,0.746,2.253,0.777,0.000	21.95	14.095	6.15	9.44	0.28	0.67	0.684864	0.322684	-1.08569	0	0	3;5;1;1;1157;759;2;1;3;1370;604	1;1;543;1675;1;0;3;0;4;831;433	2.983,4.043,1.000,0.860,1035.996,690.368,1.728,0.914,2.498	0.994,0.809,543.000.1440.463,0.895,0.000,2.592,0.000,3.331	29.35	17.803	23.7	16.99	0.807	0.954	0.6091	0.343673	-0.825643	0	0
chrIV:593836-593851	chrIV;593798;593892	uORF	Scer	Y	0.748	0.392333	0.291667	15	38	41	UCACGUUGA	UUG	AACAAGCAAUAG	0.833593	MNKQ	UAG	AAAACCAAAA	YDR074W|chrIV;593798;593892|593836,593851,AAG	YDR074W|chrIV;593798;593892|WT	115;242;158;2546;26548;34790;7912;693;34;26882;25955	94;179;118;2210;32405;43401;11276;2360;295;35783;33241	98.926,216.354,144.188,2131.453,26548.000,25965.628,5943.129,538.726,26.144	80.861,160.030,107.685.1850.161,32405.000,32392.476,8470.011,1834.622,226.834	586.531	780.739	1016.66	1302.06	1.733	1.668	0.640008	0.652191	0.0272048	1.08e-50	1.57e-50	67;55;283;5970;26007;22626;4032;1314;36;26913;18658	68;211;27;3345;39896;29611;13767;2431;1951;32862;33011	66.626,44.476,283.000,5134.070,23287.078,20580.057,3483.742,1201.441,29.977	67.620,170.625,27.000.2876.627,35723.508,26933.443,11895.009,2222.757,1624.603	576.571	704.019	732.098	1295.28	1.27	1.84	0.6171	0.654849	0.0856574	0	0
chrIV:593866-oORF	chrIV;593798;593892	oORF	Scer	Y	NA	NA	NA	NA	68	NA	UAACACUGC	CUG	NA	NA	NA	NA	NA	YDR074W|chrIV;593798;593892|593866,593893,AAG	YDR074W|chrIV;593798;593892|WT	55;31;131;5008;22235;12547;6347;1227;39;16617;10818	94;179;118;2210;32405;43401;11276;2360;295;35783;33241	47.312,27.715,119.549,4192.582,22235.000,9364.494,4767.573,953.848,29.988	80.861,160.030,107.685.1850.161,32405.000,32392.476,8470.011,1834.622,226.834	362.561	780.739	423.744	1302.06	1.169	1.668	0.608994	0.652191	0.0988682	0	0	39;35;429;6070;19678;8003;785;18;35;15409;14692	68;211;27;3345;39896;29611;13767;2431;1951;32862;33011	38.782,28.303,429.000,5220.067,17619.992,7279.333,678.258,16.458,29.145	67.620,170.625,27.000.2876.627,35723.508,26933.443,11895.009,2222.757,1624.603	330.115	704.019	576.481	1295.28	1.746	1.84	0.558366	0.654849	0.229951	0	0
chrIV:610363-610414	chrIV;610348;610440	uORF	Scer	N	0.0236667	0.00178431	0.001	51	15	26	AAUAUAUGA	AUG	AAAUCCUGCUUGUUGAUAUUCCAUUUCUGUGCGAAAAAAGAGCAAUAA	0.763795	MKSCLLIFHFCAKKEQ	UAA	GCUGGCUUUU	YDR082W|chrIV;610348;610440|610363,AAG	YDR082W|chrIV;610348;610440|WT	7443;12864;308;11;4;17;20;16;16;10838;3145	11221;5070;5;7;47;17;15;24;12;9750;882	6402.643,11500.737,281.076,9.209,4.000,12.688,15.023,12.438,12.303	9652.568,4532.707,4.563.5.860,47.000,12.688,11.267,18.657,9.227	236.471	212.732	123.19	34.548	0.521	0.162	0.0577632	0.0352247	-0.713564	0	0	6508;15738;236;11;13;20;16;10;23;10061;2281	12608;8519;275;328;211;14;15;9;18;10028;1332	6471.661,12726.499,236.000,9.460,11.640,18.192,13.824,9.143,19.152	12537.599,6888.871,275.000.282.073,188.933,12.734,12.960,8.229,14.989	215.542	214.835	89.501	52.265	0.415	0.243	0.0554137	0.0450966	-0.297222	0	0
chrIV:610428-oORF	chrIV;610348;610440	oORF	Scer	N	NA	NA	NA	NA	80	NA	UAAUAAUGG	AUG	NA	NA	NA	NA	NA	YDR082W|chrIV;610348;610440|610428,AAG	YDR082W|chrIV;610348;610440|WT	136;8;230;4165;5922;5511;1812;16;21;9400;9549	11221;5070;5;7;47;17;15;24;12;9750;882	116.990,7.152,209.894,3486.842,5922.000,4113.153,1361.091,12.438,16.147	9652.568,4532.707,4.563.5.860,47.000,12.688,11.267,18.657,9.227	205.096	212.732	374.037	34.548	1.824	0.162	0.574621	0.0352247	-4.02795	0	0	52;20;199;3379;9526;2949;1303;15;17;9127;6637	12608;8519;275;328;211;14;15;9;18;10028;1332	51.710,16.173,199.000,2905.866,8529.731,2682.338,1125.822,13.715,14.156	12537.599,6888.871,275.000.282.073,188.933,12.734,12.960,8.229,14.989	195.532	214.835	260.421	52.265	1.332	0.243	0.559602	0.0450966	-3.63331	0	0
chrIV:614011-oORF	chrIV;614074;614004	oORF	Scer	N	NA	NA	NA	NA	63	NA	UACGAAUGA	AUG	NA	NA	NA	NA	NA	YDR084C|chrIV;614074;614004|614011,AAG	YDR084C|chrIV;614074;614004|WT	6;5;36;3;144;5;1301;3214;2024;1997;459	13;171;242;1904;5515;3001;59;7;12;5198;172	5.161,4.470,32.853,2.512,144.000,3.732,977.251,2498.507,1556.310	11.183,152.878,220.845.1593.985,5515.000,2239.806,44.318,5.442,9.227	43.572	113.414	17.979	6.737	0.413	0.059	0.895862	0.548457	-0.707896	0	0	7;4;1;3;101;739;69;2354;474;2642;238	6;8;1;3329;5230;1885;435;7;7;4413;428	6.961,3.235,1.000,2.580,90.437,672.176,59.618,2152.353,394.701	5.966,6.469,1.000.2862.867,4683.024,1714.550,375.850,6.400,5.829	56.601	94.542	9.339	16.794	0.165	0.178	0.877172	0.537652	-0.706186	0	0
chrIV:65044-65020	chrIV;65068;65018	uORF	Scer	N	0.000333333	0.0204231	0.0993333	24	24	2	UACGAAUGA	AUG	ACCGUGGAAACUAUCGCCUAA	0.723303	MTVETIA	UAA	AAATGAGATC	YDL220C|chrIV;65068;65018|65044,AAG	YDL220C|chrIV;65068;65018|WT	3;433;1984;226;2;0;3;2;1;1195;980	95;651;30;0;1;4;2;0;0;591;20	2.581,387.113,1810.567,189.202,2.000,0.000,2.253,1.555,0.769	81.721,582.010,27.378.0.000,1.000,2.985,1.502,0.000,0.000	26.073	12.895	38.387	0.783	1.472	0.061	0.23144	0.0813438	-1.50853	3.02e-228	6.18e-228	2;686;1625;192;21;61;2;2;4;1084;1361	289;1091;47;25;26;0;3;2;0;610;386	1.989,554.732,1625.000,165.116,18.804,55.484,1.728,1.829,3.331	287.386,882.235,47.000.21.499,23.281,0.000,2.592,1.829,0.000	23.223	13.068	53.403	15.146	2.3	1.159	0.22514	0.0808586	-1.47735	1.48e-284	3.25e-284
chrIV:65064-65040	chrIV;65068;65018	uORF	Scer	N	0.002	0.00153846	0	24	4	22	ND-too-cl	AUG	UUUCUCUUUGGAUACGAAUGA	0.695279	MFLFGYE	UGA	CCGUGGAAAC	YDL220C|chrIV;65068;65018|65064,AAG	YDL220C|chrIV;65068;65018|WT	3;941;1359;14;0;2;6;2;0;855;526	95;651;30;0;1;4;2;0;0;591;20	2.581,841.278,1240.202,11.720,0.000,1.493,4.507,1.555,0.000	81.721,582.010,27.378.0.000,1.000,2.985,1.502,0.000,0.000	18.655	12.895	20.604	0.783	1.104	0.061	0.180955	0.0813438	-1.15352	6.34e-121	1.1e-120	2;499;1197;163;2;0;2;4;1;833;886	289;1091;47;25;26;0;3;2;0;610;386	1.989,403.515,1197.000,140.176,1.791,0.000,1.728,3.657,0.833	287.386,882.235,47.000.21.499,23.281,0.000,2.592,1.829,0.000	17.846	13.068	34.765	15.146	1.948	1.159	0.213978	0.0808586	-1.40399	2.2e-248	4.63e-248
chrIV:658025-657980	chrIV;658146;657980	uORF	Scer	N	0.002	0.00123404	0.000333333	45	121	0	AAUUCAUGU	AUG	NA	NA	NA	NA	ATGAGATCTA	YDR102C|chrIV;658146;657980|658025,AAG	YDR102C|chrIV;658146;657980|WT	2261;95;1;0;0;0;1;1;2;722;0	858;0;92;0;0;0;0;0;1;670;29	1944.965,84.932,0.913,0.000,0.000,0.000,0.751,0.777,1.538	738.072,0.000,83.958.0.000,0.000,0.000,0.000,0.000,0.769	15.753	14.619	0	1.136	0	0.078	0.0132345	0.0338675	1.3556	0.0082	0.00884	1323;196;0;2;173;2;2;0;0;880;94	1066;34;0;0;0;1;0;2;2;616;57	1315.613,158.495,0.000,1.720,154.907,1.819,1.728,0.000,0.000	1060.048,27.494,0.000.0.000,0.000,0.910,0.000,1.829,1.665	18.853	13.197	3.688	2.237	0.196	0.17	0.067567	0.0136966	-2.3025	1.29e-13	1.52e-13
chrIV:658067-658028	chrIV;658146;657980	uORF	Scer	N	0	0.000585366	0.002	39	79	48	UGGACAUGU	AUG	UGUCGUCUAAUCACUACCUUUAUAUUUUUUAAUUAA	0.750802	MCRLITTFIFFN	UAA	UUCAUGUGCA	YDR102C|chrIV;658146;657980|658067,AAG	YDR102C|chrIV;658146;657980|WT	416;173;1;2;0;0;0;1;2;110;0	858;0;92;0;0;0;0;0;1;670;29	357.853,154.666,0.913,1.674,0.000,0.000,0.000,0.777,1.538	738.072,0.000,83.958.0.000,0.000,0.000,0.000,0.000,0.769	2.4	14.619	0	1.136	0	0.078	0.036168	0.0338675	-0.094814	4.36e-08	5.03e-08	447;503;0;0;0;0;0;0;1;288;35	1066;34;0;0;0;1;0;2;2;616;57	444.504,406.750,0.000,0.000,0.000,0.000,0.000,0.000,0.833	1060.048,27.494,0.000.0.000,0.000,0.910,0.000,1.829,1.665	6.17	13.197	1.373	2.237	0.223	0.17	0.0393941	0.0136966	-1.52416	3.95e-64	5.89e-64
chrIV:658073-658028	chrIV;658146;657980	uORF	Scer	N	0.000666667	0.000553191	0.002	45	73	48	UACCUAUGG	AUG	GACAUGUGUCGUCUAAUCACUACCUUUAUAUUUUUUAAUUAA	0.748114	MDMCRLITTFIFFN	UAA	UUCAUGUGCA	YDR102C|chrIV;658146;657980|658073,AAG	YDR102C|chrIV;658146;657980|WT	1389;246;0;2;0;3;0;0;2;710;0	858;0;92;0;0;0;0;0;1;670;29	1194.850,219.930,0.000,1.674,0.000,2.239,0.000,0.000,1.538	738.072,0.000,83.958.0.000,0.000,0.000,0.000,0.000,0.769	15.491	14.619	0	1.136	0	0.078	0.0223784	0.0338675	0.597795	0.105	0.11	2183;579;1;0;0;1;0;1;1;538;117	1066;34;0;0;0;1;0;2;2;616;57	2170.811,468.207,1.000,0.000,0.000,0.910,0.000,0.914,0.833	1060.048,27.494,0.000.0.000,0.000,0.910,0.000,1.829,1.665	11.526	13.197	4.591	2.237	0.398	0.17	0.0203559	0.0136966	-0.571622	9.09e-13	1.07e-12
chrIV:658087-658054	chrIV;658146;657980	uORF	Scer	N	0.001	0.0004	0.001	33	59	74	AAAUUAUGA	AUG	ACAGGUUACCUAUGGACAUGUGUCGUCUAA	0.782464	MTGYLWTCVV	UAA	UCACUACCUU	YDR102C|chrIV;658146;657980|658087,AAG	YDR102C|chrIV;658146;657980|WT	820;250;0;0;0;0;0;0;0;248;0	858;0;92;0;0;0;0;0;1;670;29	705.383,223.506,0.000,0.000,0.000,0.000,0.000,0.000,0.000	738.072,0.000,83.958.0.000,0.000,0.000,0.000,0.000,0.769	5.411	14.619	0	1.136	0	0.078	0.0248041	0.0338675	0.449322	4.41e-05	4.93e-05	94;0;0;0;0;1;0;0;1;193;0	1066;34;0;0;0;1;0;2;2;616;57	93.475,0.000,0.000,0.000,0.000,0.910,0.000,0.000,0.833	1060.048,27.494,0.000.0.000,0.000,0.910,0.000,1.829,1.665	4.135	13.197	0	2.237	0	0.17	0.0255456	0.0136966	-0.899255	0.88622	0.890587
chrIV:675718-675712	chrIV;675807;675667	uORF	Scer	N	0.894667	0.856625	0.750333	6	89	45	AAAAGAUGU	AUG	UAA	1	M	UAA	AGAGACGAAG	YDR109C|chrIV;675807;675667|675718,AAG	YDR109C|chrIV;675807;675667|WT	13566;2969;5;3;10;15;14;10;15;7509;0	17944;90;70;100;9;11;9;6;10;8471;0	11669.792,2654.360,4.563,2.512,10.000,11.195,10.516,7.774,11.534	15435.850,80.462,63.881.83.718,9.000,8.210,6.760,4.664,7.689	163.837	184.826	0	0	0	0	0.0240948	0.0137318	-0.811205	5.43e-143	9.77e-143	15342;3001;6;38;10;14;14;5;7;8158;0	17193;898;8;7;7;5;9;7;10;7859;8	15256.333,2426.752,6.000,32.679,8.954,12.734,12.096,4.572,5.829	17096.998,726.166,8.000.6.020,6.268,4.548,7.776,6.400,8.327	174.773	168.367	0	0.314	0	0.002	0.0193795	0.0124202	-0.641838	2.27e-57	3.32e-57
chrIV:675726-oORF	chrIV;675807;675667	oORF	Scer	N	NA	NA	NA	NA	81	NA	GUACAAUGA	AUG	NA	NA	NA	NA	NA	YDR109C|chrIV;675807;675667|675726,AAG	YDR109C|chrIV;675807;675667|WT	10976;309;6;6;7;90;16;5;11;7714;0	17944;90;70;100;9;11;9;6;10;8471;0	9441.813,276.254,5.476,5.023,7.000,67.172,12.018,3.887,8.458	15435.850,80.462,63.881.83.718,9.000,8.210,6.760,4.664,7.689	168.31	184.826	0	0	0	0	0.0184203	0.0137318	-0.423779	0.0024278	0.00264327	14139;1530;164;88;6;5;9;9;8;6892;37	17193;898;8;7;7;5;9;7;10;7859;8	14060.051,1237.231,164.000,75.678,5.372,4.548,7.776,8.229,6.662	17096.998,726.166,8.000.6.020,6.268,4.548,7.776,6.400,8.327	147.651	168.367	1.452	0.314	0.01	0.002	0.0190797	0.0124202	-0.61935	1.27e-17	1.54e-17
chrIV:675761-675731	chrIV;675807;675667	uORF	Scer	N	0.000666667	0.656188	1	30	46	64	AGUAAAUGU	AUG	UGGAAAGCUGCACACCCAGACCGCUGA	0.676575	MWKAAHPDR	UGA	GUACAAUGAA	YDR109C|chrIV;675807;675667|675761,AAG	YDR109C|chrIV;675807;675667|WT	12722;543;8;352;4;10;10;9;7;7395;0	17944;90;70;100;9;11;9;6;10;8471;0	10943.763,485.456,7.301,294.686,4.000,7.464,7.512,6.996,5.382	15435.850,80.462,63.881.83.718,9.000,8.210,6.760,4.664,7.689	161.349	184.826	0	0	0	0	0.0232941	0.0137318	-0.762445	7.95e-14	9.61e-14	9781;3737;362;223;406;6;9;4;7;8583;0	17193;898;8;7;7;5;9;7;10;7859;8	9726.385,3021.917,362.000,191.775,363.539,5.457,7.776,3.657,5.829	17096.998,726.166,8.000.6.020,6.268,4.548,7.776,6.400,8.327	183.878	168.367	0	0.314	0	0.002	0.0491267	0.0124202	-1.98382	0	0
chrIV:675784-675712	chrIV;675807;675667	uORF	Scer	N	0.000666667	0.524838	0.750333	72	23	45	ACUAAAUGC	AUG	CUACAGACCAGUAUUAGUAAAUGUGGAAAGCUGCACACCCAGACCGCUGAGUACAAUGAAAAGAUGUAA	0.68723	MLQTSISKCGKLHTQTAEYNEKM	UAA	AGAGACGAAG	YDR109C|chrIV;675807;675667|675784,AAG	YDR109C|chrIV;675807;675667|WT	18194;357;2;265;5;4;10;11;10;7745;0	17944;90;70;100;9;11;9;6;10;8471;0	15650.906,319.167,1.825,221.852,5.000,2.985,7.512,8.551,7.689	15435.850,80.462,63.881.83.718,9.000,8.210,6.760,4.664,7.689	168.986	184.826	0	0	0	0	0.0167706	0.0137318	-0.288411	0.0043306	0.00468793	12717;1482;102;3;7;6;16;4;6;7254;0	17193;898;8;7;7;5;9;7;10;7859;8	12645.991,1198.416,102.000,2.580,6.268,5.457,13.824,3.657,4.996	17096.998,726.166,8.000.6.020,6.268,4.548,7.776,6.400,8.327	155.406	168.367	0	0.314	0	0.002	0.0171758	0.0124202	-0.467688	8.53e-16	1.02e-15
chrIV:675792-oORF	chrIV;675807;675667	oORF	Scer	N	NA	NA	NA	NA	15	NA	CCCGUUUGA	UUG	NA	NA	NA	NA	NA	YDR109C|chrIV;675807;675667|675792,675667,AAG	YDR109C|chrIV;675807;675667|WT	10059;383;3;659;3;7;5;3;5;3719;0	17944;90;70;100;9;11;9;6;10;8471;0	8652.988,342.412,2.738,551.700,3.000,5.224,3.756,2.332,3.845	15435.850,80.462,63.881.83.718,9.000,8.210,6.760,4.664,7.689	81.144	184.826	0	0	0	0	0.0346721	0.0137318	-1.33626	5.44e-26	7.06e-26	7121;2655;2;335;3;4;10;3;3;2577;0	17193;898;8;7;7;5;9;7;10;7859;8	7081.238,2146.960,2.000,288.093,2.686,3.638,8.640,2.743,2.498	17096.998,726.166,8.000.6.020,6.268,4.548,7.776,6.400,8.327	55.208	168.367	0	0.314	0	0.002	0.0354394	0.0124202	-1.51266	1.52e-189	2.95e-189
chrIV:676067-676076	chrIV;676046;676101	uORF	Scer	N	0.001	0.00122222	0.00166667	9	21	25	UAACGAUUG	AUU	GUGUGA	0.706193	MV	UGA	GUGUGAAUUU	YDR110W|chrIV;676046;676101|676067,676076,AAG	YDR110W|chrIV;676046;676101|WT	9;5;5;126;2748;2378;990;442;4;2892;7151	5;3;2;18;614;1880;904;83;2;1881;3627	7.742,4.470,4.563,105.484,2748.000,1774.828,743.642,343.603,3.076	4.301,2.682,1.825.15.069,614.000,1403.144,679.043,64.523,1.538	63.1	41.041	280.106	142.07	4.439	3.462	0.653108	0.705521	0.111367	1.64e-76	2.57e-76	5;2;1;163;3261;2260;1515;262;9;2392;5156	4;7;1;42;1041;1061;1273;2;2;1635;4367	4.972,1.617,1.000,140.176,2919.951,2055.641,1308.995,239.557,7.494	3.978,5.661,1.000.36.119,932.128,965.060,1099.902,1.829,1.665	51.245	35.027	202.31	171.351	3.948	4.892	0.664036	0.700376	0.0768678	1.1e-37	1.48e-37
chrIV:699488-oORF	chrIV;699538;699468	oORF	Scer	N	NA	NA	NA	NA	50	NA	AAUACAUGG	AUG	NA	NA	NA	NA	NA	YDR123C|chrIV;699538;699468|699488,AAG	YDR123C|chrIV;699538;699468|WT	3;5;2;5;3;3;60;941;5124;1455;2419	2;3;3;1;1197;1126;394;2;3;1733;1684	2.581,4.470,1.825,4.186,3.000,2.239,45.069,731.517,3939.986	1.720,2.682,2.738.0.837,1197.000,840.394,295.955,1.555,2.307	31.746	37.812	94.753	65.963	2.985	1.744	0.978216	0.643072	-0.605173	0	0	5;3;2;2;2;3;4;594;4690;1628;2228	4;3;1;438;1795;971;32;4;0;1377;1586	4.972,2.426,2.000,1.720,1.791,2.729,3.456,543.117,3905.377	3.978,2.426,1.000.376.670,1607.271,883.198,27.649,3.657,0.000	34.877	29.5	87.422	62.231	2.507	2.11	0.98825	0.57615	-0.778432	0	0
chrIV:718539-718500	chrIV;718559;718460	uORF	Scer	N	0.042	0.0129512	0.000666667	39	20	40	GGAUAAUGU	AUG	UGUGCAAAAAGAAGAAACUUUGGUGUCUUAAAAUAG	0.899627	MCAKRRNFGVLK	UAG	AUAAAAAUAA	YDR131C|chrIV;718559;718460|718539,AAG	YDR131C|chrIV;718559;718460|WT	5;7;2;643;3043;2474;6;7;7;2641;394	4336;62;26;1;224;4;2;2;4;2300;0	4.301,6.258,1.825,538.305,3043.000,1846.478,4.507,5.442,5.382	3729.929,55.430,23.727.0.837,224.000,2.985,1.502,1.555,3.076	57.623	50.183	15.433	0	0.268	0	0.589319	0.0434115	-3.7629	0	0	0;6;2;1138;3121;772;3;2;3;2370;566	2214;891;1;2;1;3;5;2;1;2200;150	0.000,4.852,2.000,978.655,2794.593,702.192,2.592,1.829,2.498	2201.637,720.505,1.000.1.720,0.895,2.729,4.320,1.829,0.833	50.774	47.132	22.209	5.886	0.437	0.125	0.53607	0.0272012	-4.30068	0	0
chrIV:728160-728199	chrIV;728158;728258	uORF	Scer	N	0.027	0.0054359	0	39	2	59	ND-too-cl	AUG	CAAAGGCUGCCAGUCGAAACAAACAGCGAAAGCUAG	0.68345	MQRLPVETNSES	UAG	CCCAUAAUUU	YDR137W|chrIV;728158;728258|728160,AAG	YDR137W|chrIV;728158;728258|WT	9;13;8;2;1588;4755;4086;4;6;2411;1242	7;2536;203;4;3;4;5;4;2;1317;830	7.742,11.622,7.301,1.674,1588.000,3548.910,3069.215,3.110,4.614	6.022,2267.247,185.255.3.349,3.000,2.985,3.756,3.110,1.538	52.605	28.735	48.649	32.511	0.925	1.131	0.72313	0.094091	-2.94213	0	0	13;12;5;5;2373;6090;1114;26;850;1783;1861	640;4578;134;0;551;2;4;3;7;1648;334	12.927,9.704,5.000,4.300,2124.822,5539.315,962.522,23.773,707.797	636.426,3701.990,134.000.0.000,493.374,1.819,3.456,2.743,5.829	38.198	35.306	73.021	13.105	1.912	0.371	0.704859	0.117543	-2.58415	0	0
chrIV:755108-755069	chrIV;755143;755066	uORF	Scer	Y	0.027	0.202122	0.919667	39	35	3	CACAUUUGU	UUG	UUACAACCAAAGACACAACUUCAGAUAAUUAUUUAA	0.811469	MLQPKTQLQIII	UAA	ACAATGAGAT	YDR148C|chrIV;755143;755066|755108,755069,AAG	YDR148C|chrIV;755143;755066|WT	5;5;3;3;7;4;1949;3062;927;1460;1319	3;7;2;2;1;340;5151;1237;2173;1891;2026	4.301,4.470,2.738,2.512,7.000,2.985,1463.999,2380.345,712.796	2.581,6.258,1.825.1.674,1.000,253.760,3869.193,961.622,1670.880	31.855	41.259	51.666	79.359	1.622	1.923	0.884716	0.874772	-0.0163077	8.21e-66	1.25e-65	4;6;3;3;3;5;861;3284;1801;1511;1718	11;5;1;2;6;9;869;5122;1989;2408;2881	3.978,4.852,3.000,2.580,2.686,4.548,743.924,3002.688,1499.698	10.939,4.043,1.000.1.720,5.372,8.186,750.836,4683.242,1656.246	32.371	51.588	67.41	113.044	2.082	2.191	0.933801	0.933008	-0.00122531	0.064834	0.067646
chrIV:771833-oORF	chrIV;771783;771876	oORF	Scer	N	NA	NA	NA	NA	50	NA	CACUGUUGG	UUG	NA	NA	NA	NA	NA	YDR159W|chrIV;771783;771876|771833,771877,AAG	YDR159W|chrIV;771783;771876|WT	300;10616;570;6;3;5;12;7;7;4837;592	451;12878;3680;376;16;26;27;18;19;8796;2426	258.067,9490.969,520.173,5.023,3.000,3.732,9.014,5.442,5.382	387.961,11513.254,3358.311.314.779,16.000,19.405,20.281,13.993,14.610	105.537	191.917	23.189	95.027	0.22	0.495	0.0854915	0.121196	0.503485	1.07e-136	1.91e-136	333;7676;320;6;223;9;14;7;9;4241;1442	138;16042;3569;180;103;255;8;127;15;9089;1548	331.141,6207.181,320.000,5.160,199.678,8.186,12.096,6.400,7.494	137.229,12972.328,3569.000.154.796,92.228,231.942,6.912,116.121,12.491	90.857	194.718	56.581	60.74	0.623	0.312	0.0937634	0.125975	0.426043	4.01e-115	6.8e-115
chrIV:781354-781381	chrIV;781349;781422	uORF	Scer	N	0.0236667	0.0144074	0.005	27	5	41	ND-too-cl	AUG	ACAAAGCUCCAAAAGGCUCCAUAA	0.744494	MTKLQKAP	UAA	AGAACUUGCU	YDR163W|chrIV;781349;781422|781354,AAG	YDR163W|chrIV;781349;781422|WT	9;16;9;4;235;7262;4830;844;1058;4165;4764	983;8970;251;4;220;5;23;6;17;6378;1884	7.742,14.304,8.213,3.349,235.000,5420.017,3628.073,656.111,813.526	845.600,8019.404,229.059.3.349,220.000,3.732,17.277,4.664,13.072	90.875	139.16	186.607	73.797	2.053	0.53	0.778888	0.0891831	-3.12657	0	0	16;9;4;13;247;1688;5225;1112;12;3481;5848	4073;8099;86;5;5;9;10;9;10;6710;1654	15.911,7.278,4.000,11.180,221.168,1535.364,4514.522,1016.744,9.992	4050.257,6549.239,86.000.4.300,4.477,8.186,8.640,8.229,8.327	74.575	143.752	229.462	64.899	3.077	0.451	0.812651	0.0518587	-3.96998	0	0
chrIV:784235-oORF	chrIV;784257;784215	oORF	Scer	N	NA	NA	NA	NA	22	NA	UGCACAUGC	AUG	NA	NA	NA	NA	NA	YDR164C|chrIV;784257;784215|784235,784215,AAG	YDR164C|chrIV;784257;784215|WT	131;2;4;1;3;629;1901;679;307;823;1621	1;575;750;59;0;3;3;1;2;670;321	112.689,1.788,3.650,0.837,3.000,469.456,1427.943,527.843,236.061	0.860,514.064,684.438.49.393,0.000,2.239,2.253,0.777,1.538	17.957	14.619	63.495	12.574	3.536	0.86	0.800882	0.186225	-2.10454	0	0	21;1;0;4;3;528;1239;701;416;780;1564	3;514;1021;61;3;3;61;1;2;945;456	20.883,0.809,0.000,3.440,2.686,480.256,1070.525,640.951,346.404	2.983,415.645,1021.000.52.459,2.686,2.729,52.705,0.914,1.665	16.71	20.245	61.368	17.892	3.673	0.884	0.85106	0.221427	-1.94243	0	0
chrIV:806595-oORF	chrIV;806534;806620	oORF	Scer	N	NA	NA	NA	NA	61	NA	CACAAAUUA	AUU	NA	NA	NA	NA	NA	YDR171W|chrIV;806534;806620|806595,806620,AAG	YDR171W|chrIV;806534;806620|WT	24;14;12;35;202;3116;9628;7205;1726;7877;9918	50;34;31;135;2482;19346;19278;9216;3048;13079;12994	20.645,12.516,10.951,29.301,202.000,2325.637,7232.109,5601.040,1327.170	43.011,30.397,28.290.113.019,2482.000,14438.949,14480.743,7164.356,2343.692	171.866	285.367	388.49	508.978	2.26	1.784	0.841122	0.788886	-0.0924967	0	0	18;27;11;12;64;5078;12313;5709;6122;9681;11509	55;47;18;586;1718;18186;13836;8127;3507;14546;15822	17.899,21.833,11.000,10.320,57.307,4618.825,10638.719,5219.959,5097.807	54.693,38.006,18.000.503.947,1538.324,16541.542,11954.627,7430.830,2920.289	207.401	311.626	451.587	620.82	2.177	1.992	0.863858	0.79516	-0.119548	0	0
chrIV:811657-811645	chrIV;811695;811632	uORF	Scer	N	0.631	0.725857	0.859333	12	38	13	UACGUGUGC	GUG	CCUAAGUAG	0.815819	MPK	UAG	AAAUUUUUUU	YDR173C|chrIV;811695;811632|811657,811645,AAG	YDR173C|chrIV;811695;811632|WT	723;2475;3;38;2;6;5;6;4;2127;369	100;3511;1555;245;4;3;5;4;0;2521;2169	621.942,2212.712,2.738,31.813,2.000,4.478,3.756,4.664,3.076	86.022,3138.922,1419.069.205.108,4.000,2.239,3.756,3.110,0.000	46.408	55.005	14.454	84.96	0.311	1.545	0.0706518	0.139937	0.985977	2.24e-228	4.59e-228	232;3150;15;29;4;2;2;3;5;1608;429	148;2814;1527;2;214;54;5;3;7;2637;1304	230.705,2547.241,15.000,24.939,3.582,1.819,1.728,2.743,4.164	147.174,2275.535,1527.000.1.720,191.619,49.117,4.320,2.743,5.829	34.449	56.494	16.833	51.166	0.489	0.906	0.0741319	0.161941	1.1273	1.21e-189	2.35e-189
chrIV:811669-811645	chrIV;811695;811632	uORF	Scer	N	0.568667	0.666077	0.859333	24	26	13	UGGAUAUGU	AUG	UGCAUACGUGUGCCUAAGUAG	0.604825	MCIRVPK	UAG	AAAUUUUUUU	YDR173C|chrIV;811695;811632|811669,AAG	YDR173C|chrIV;811695;811632|WT	5;7;17;800;1715;2297;218;114;2;2817;3061	100;3511;1555;245;4;3;5;4;0;2521;2169	4.301,6.258,15.514,669.742,1715.000,1714.373,163.752,88.622,1.538	86.022,3138.922,1419.069.205.108,4.000,2.239,3.756,3.110,0.000	61.463	55.005	119.9	84.96	1.951	1.545	0.604287	0.139937	-2.11046	0	0	9;10;4;494;4277;1532;545;1;5;3555;4039	148;2814;1527;2;214;54;5;3;7;2637;1304	8.950,8.086,4.000,424.829,3829.693,1393.470,470.893,0.914,4.164	147.174,2275.535,1527.000.1.720,191.619,49.117,4.320,2.743,5.829	76.161	56.494	158.481	51.166	2.081	0.906	0.593268	0.161941	-1.87322	0	0
chrIV:811675-811645	chrIV;811695;811632	uORF	Scer	N	0.514	0.639781	0.859333	30	20	13	CUUACAUGG	AUG	GAUAUGUGCAUACGUGUGCCUAAGUAG	0.676326	MDMCIRVPK	UAG	AAAUUUUUUU	YDR173C|chrIV;811695;811632|811675,AAG	YDR173C|chrIV;811695;811632|WT	34;2769;281;1;0;3;4;4;4;1084;272	100;3511;1555;245;4;3;5;4;0;2521;2169	29.248,2475.555,256.436,0.837,0.000,2.239,3.005,3.110,3.076	86.022,3138.922,1419.069.205.108,4.000,2.239,3.756,3.110,0.000	23.651	55.005	10.654	84.96	0.45	1.545	0.095599	0.139937	0.549708	2.7e-64	4.09e-64	1;1482;305;2;3;3;0;1;3;1380;188	148;2814;1527;2;214;54;5;3;7;2637;1304	0.994,1198.416,305.000,1.720,2.686,2.729,0.000,0.914,2.498	147.174,2275.535,1527.000.1.720,191.619,49.117,4.320,2.743,5.829	29.564	56.494	7.377	51.166	0.25	0.906	0.109987	0.161941	0.558131	5.38e-30	6.96e-30
chrIV:817891-817903	chrIV;817847;817949	uORF	Scer	Y	0.00633333	0.00458333	0.00133333	12	44	46	UUCUGUUGU	UUG	UUUUCUUGA	1	MFS	UGA	UCUUUCCUAC	YDR178W|chrIV;817847;817949|817891,817903,AAG	YDR178W|chrIV;817847;817949|WT	29;31;36;127;66;2925;11752;14866;16309;12963;9006	40;22;33;14;48;1355;3656;17004;19691;10294;8297	24.946,27.715,32.853,106.321,66.000,2183.083,8827.560,11556.566,12540.445	34.409,19.669,30.115.11.720,48.000,1011.309,2746.218,13218.610,15140.959	282.836	224.602	352.767	324.995	1.247	1.447	0.899075	0.928116	0.0458635	0	0	64;51;79;423;23;18;16858;18639;17091;12447;8331	36;134;9;22;211;222;7592;14834;21141;11146;8185	63.643,41.241,79.000,363.771,20.595,16.372,14565.705,17042.357,14231.725	35.799,108.359,9.000.18.920,188.933,201.926,6559.665,13563.298,17604.172	266.658	238.786	326.89	321.161	1.226	1.345	0.915297	0.939644	0.0378756	0	0
chrIV:819425-oORF	chrIV;819345;819432	oORF	Scer	N	NA	NA	NA	NA	80	NA	UCUAUAUGU	AUG	NA	NA	NA	NA	NA	YDR179W-A|chrIV;819345;819432|819425,AAG	YDR179W-A|chrIV;819345;819432|WT	16;4;2403;7705;2981;7;10;10;7;5664;2781	323;2888;1116;203;1;5;4;6;4;2842;536	13.764,3.576,2192.940,6450.449,2981.000,5.224,7.512,7.774,5.382	277.852,2581.944,1018.444.169.947,1.000,3.732,3.005,4.664,3.076	123.581	62.009	108.932	20.995	0.881	0.339	0.404458	0.130706	-1.62967	0	0	6;9;2051;8765;1484;10;375;10;10;5434;3411	446;5962;759;162;1;5;2;1;5;2108;713	5.966,7.278,2051.000,7537.709,1328.797,9.096,324.009,9.143,8.327	443.510,4821.158,759.000.139.316,0.895,4.548,1.728,0.914,4.164	116.415	45.161	133.84	27.977	1.15	0.619	0.388709	0.0961049	-2.01601	0	0
chrIV:821214-821244	chrIV;821151;821294	uORF	Scer	N	0.0716667	0.0294667	0.042	30	63	50	UGCUCCUGU	CUG	UGUGCUCAGGCUUUUCGUUUGUUGUGA	0.80109	MCAQAFRLL	UGA	GAGUAUUGUU	YDR180W|chrIV;821151;821294|821214,821244,AAG	YDR180W|chrIV;821151;821294|WT	8;7;2;3;1224;4924;2398;1675;597;3669;2402	7;6;7;3;514;6918;4867;187;11;3320;2502	6.882,6.258,1.825,2.512,1224.000,3675.043,1801.267,1302.115,459.050	6.022,5.364,6.388.2.512,514.000,5163.272,3655.866,145.370,8.458	80.053	72.438	94.087	98.004	1.175	1.353	0.755437	0.750385	-0.00967954	1.27e-06	1.45e-06	7;10;2;7;1009;5684;5101;117;9;4546;3918	8;9;3;4;3;3153;3206;2391;232;2345;1596	6.961,8.086,2.000,6.020,903.475,5170.028,4407.383,106.978,7.494	7.955,7.278,3.000.3.440,2.686,2867.892,2770.059,2186.184,193.187	97.391	50.238	153.734	62.623	1.579	1.247	0.749937	0.818505	0.126221	0	0
chrIV:829125-oORF	chrIV;829108;829150	oORF	Scer	N	NA	NA	NA	NA	17	NA	AAUAUAUGC	AUG	NA	NA	NA	NA	NA	YDR182W-A|chrIV;829108;829150|829125,AAG	YDR182W-A|chrIV;829108;829150|WT	0;0;1;0;0;1;0;151;265;102;140	0;0;2;1;97;173;256;0;0;293;145	0.000,0.000,0.913,0.000,0.000,0.746,0.000,117.385,203.766	0.000,0.000,1.825.0.837,97.000,129.119,192.295,0.000,0.000	2.226	6.393	5.484	5.68	2.464	0.888	0.956659	0.725696	-0.398641	2.58e-119	4.45e-119	0;0;0;0;0;0;1;319;362;111;140	0;1;0;0;269;496;63;0;56;240;314	0.000,0.000,0.000,0.000,0.000,0.000,0.864,291.674,301.438	0.000,0.809,0.000.0.000,240.867,451.149,54.433,0.000,46.631	2.378	5.142	5.493	12.321	2.31	2.396	0.964679	0.684155	-0.495726	1.51e-186	2.9e-186
chrIV:835511-oORF	chrIV;835546;835492	oORF	Scer	Y	NA	NA	NA	NA	35	NA	AAAUUUUGG	UUG	NA	NA	NA	NA	NA	YDR186C|chrIV;835546;835492|835511,835492,AAG	YDR186C|chrIV;835546;835492|WT	8;2;32;179;2305;2544;1501;124;9;2643;152	11;7;2;26;2971;3015;1405;56;174;2938;73	6.882,1.788,29.203,149.855,2305.000,1898.723,1127.482,96.395,6.920	9.462,6.258,1.825.21.767,2971.000,2250.255,1055.371,43.533,133.793	57.667	64.103	5.954	2.859	0.103	0.045	0.660908	0.661647	0.0016109	0.118	0.124	4;6;27;315;2799;2630;1388;131;5;2216;188	9;8;4;440;4850;1454;782;315;140;3150;266	3.978,4.852,27.000,270.893,2506.269,2392.184,1199.264,119.778,4.164	8.950,6.469,4.000.378.390,4342.767,1322.523,675.666,288.017,116.578	47.474	67.484	7.377	10.437	0.155	0.155	0.658108	0.617377	-0.0921739	9.53e-90	1.52e-89
chrIV:835526-835514	chrIV;835546;835492	uORF	Scer	N	0.100333	0.147786	0.213	12	20	22	UACUAAUCA	AUC	ACAUCCUAA	0.815444	MTS	UAA	AUUUUGGGAA	YDR186C|chrIV;835546;835492|835526,835514,AAG	YDR186C|chrIV;835546;835492|WT	4;4;42;4;723;2475;996;545;342;2211;0	11;7;2;26;2971;3015;1405;56;174;2938;73	3.441,3.576,38.329,3.349,723.000,1847.224,748.149,423.673,262.973	9.462,6.258,1.825.21.767,2971.000,2250.255,1055.371,43.533,133.793	48.241	64.103	0	2.859	0	0.045	0.736182	0.661647	-0.154	4.14e-174	7.84e-174	5;11;4;31;1783;2294;2177;524;6;2246;179	9;8;4;440;4850;1454;782;315;140;3150;266	4.972,8.895,4.000,26.659,1596.526,2086.566,1880.979,479.113,4.996	8.950,6.469,4.000.378.390,4342.767,1322.523,675.666,288.017,116.578	48.117	67.484	7.024	10.437	0.146	0.155	0.720801	0.617377	-0.223449	0	0
chrIV:867539-oORF	chrIV;867611;867522	oORF	Scer	N	NA	NA	NA	NA	72	NA	UUUGCAUGG	AUG	NA	NA	NA	NA	NA	YDR207C|chrIV;867611;867522|867539,AAG	YDR207C|chrIV;867611;867522|WT	46;28;1445;23656;17119;3547;986;32;36;19270;10290	58;4035;43676;13700;1868;188;670;35;26;28106;14173	39.570,25.033,1318.684,19804.259,17119.000,2647.315,740.638,24.876,27.681	49.893,3607.391,39858.035.11469.325,1868.000,140.314,503.273,27.208,19.992	420.447	613.237	403.062	555.16	0.959	0.905	0.479696	0.280391	-0.77468	0	0	34;45;4626;29182;11973;1680;399;30;45;22495;12953	44;7768;44074;14821;1211;163;636;37;49;31510;13673	33.810,36.389,4626.000,25095.883,10720.813,1528.087,344.745,27.430,37.472	43.754,6281.576,44074.000.12745.736,1084.349,148.261,549.519,33.831,40.802	481.922	675.055	508.247	536.498	1.055	0.795	0.423277	0.262028	-0.69188	0	0
chrIV:868183-868213	chrIV;868105;868223	uORF	Scer	N	0.944333	0.954633	0.917667	30	78	10	GACAGUUGC	UUG	CCCUAUAUCGCUUUUCCCUAUCAAUAG	0.760172	MPYIAFPYQ	UAG	TTTCTAACTC	YDR208W|chrIV;868105;868223|868183,868213,AAG	YDR208W|chrIV;868105;868223|WT	513;30670;17154;1258;19;36;33;29;18;17068;11296	94;29;2341;32682;20168;3494;46;34;36;19370;14664	441.295,27419.746,15654.472,1053.169,19.000,26.869,24.788,22.544,13.841	80.861,25.927,2136.360.27360.619,20168.000,2607.758,34.553,26.431,27.681	372.402	422.628	442.467	574.392	1.188	1.359	0.144111	0.461993	1.68069	0	0	674;24962;13973;967;17;33;41;28;30;17474;13065	55;87;2502;30365;18308;1267;45;29;27;22245;13746	670.237,20185.466,13973.000,831.599,15.222,30.016,35.425,25.601,24.981	54.693,70.352,2502.000.26113.237,16393.272,1152.432,38.881,26.516,22.483	374.354	476.566	512.641	539.362	1.369	1.132	0.145302	0.440342	1.59957	0	0
chrIV:906920-906875	chrIV;906988;906852	uORF	Scer	Y	0	0.012617	0.00266667	45	68	23	ACAAAUUGG	UUG	GCCAAACUGCACAAGGAAAGUUCACUUUUGUUCCAGAAUUAG	0.701528	MAKLHKESSLLFQN	UAG	UUAUAGUUCC	YDR219C|chrIV;906988;906852|906920,906875,AAG	YDR219C|chrIV;906988;906852|WT	0;0;0;0;902;0;0;0;0;571;23	3;4;3;833;2561;3962;1794;5;0;897;323	0.000,0.000,0.000,0.000,902.000,0.000,0.000,0.000,0.000	2.581,3.576,2.738.697.368,2561.000,2957.051,1347.570,3.887,0.000	12.458	19.571	0.901	12.652	0.072	0.646	0.550847	0.648182	0.234746	7.1e-121	1.23e-120	0;0;0;0;507;0;0;0;0;358;103	7;2;0;77;430;1528;2;2;3;1296;244	0.000,0.000,0.000,0.000,453.976,0.000,0.000,0.000,0.000	6.961,1.617,0.000.66.218,385.029,1389.831,1.728,1.829,2.498	7.67	27.765	4.041	9.574	0.527	0.345	0.547619	0.659208	0.267562	3.58e-122	6.18e-122
chrIV:946736-oORF	chrIV;946710;946806	oORF	Scer	Y	NA	NA	NA	NA	26	NA	UUUCAAUGG	AUG	NA	NA	NA	NA	NA	YDR242W|chrIV;946710;946806|946736,946807,AAG	YDR242W|chrIV;946710;946806|WT	70;619;30623;15881;1003;27;27;27;31;19911;19354	47040;15185;29;26;187;55;422;40;44;31606;6158	60.216,553.401,27946.072,13295.208,1003.000,20.152,20.281,20.989,23.837	40464.912,13575.769,26.465.21.767,187.000,41.049,316.987,31.095,33.833	434.432	689.602	758.101	241.21	1.745	0.35	0.296221	0.0338701	-3.12859	0	0	46;369;28060;15351;2104;21;338;19;1430;21803;17335	39961;32094;436;407;469;51;48;34;47;36201;5658	45.743,298.391,28060.000,13201.525,1883.955,19.101,292.040,17.372,1190.765	39737.865,25952.743,436.000.350.011,419.950,46.388,41.473,31.088,39.137	467.097	775.552	680.187	222.007	1.456	0.286	0.316175	0.0413835	-2.9336	0	0
chrIV:946766-oORF	chrIV;946710;946806	oORF	Scer	N	NA	NA	NA	NA	56	NA	CUGACCUGU	CUG	NA	NA	NA	NA	NA	YDR242W|chrIV;946710;946806|946766,946806,AAG	YDR242W|chrIV;946710;946806|WT	7306;32260;421;26;540;34;615;28;39;23439;6513	47040;15185;29;26;187;55;422;40;44;31606;6158	6284.793,28841.246,384.198,21.767,540.000,25.376,461.960,21.767,29.988	40464.912,13575.769,26.465.21.767,187.000,41.049,316.987,31.095,33.833	511.409	689.602	255.116	241.21	0.499	0.35	0.0848302	0.0338701	-1.32457	0	0	11206;42571;806;23;27;226;60;24;739;24811;5336	39961;32094;436;407;469;51;48;34;47;36201;5658	11143.428,34424.946,806.000,19.779,24.176,205.564,51.841,21.944,615.367	39737.865,25952.743,436.000.350.011,419.950,46.388,41.473,31.088,39.137	531.539	775.552	209.373	222.007	0.394	0.286	0.0757975	0.0413835	-0.873095	0	0
chrIV:958355-oORF	chrIV;958397;958339	oORF	Scer	N	NA	NA	NA	NA	42	NA	UAUGGAUGG	AUG	NA	NA	NA	NA	NA	YDR248C|chrIV;958397;958339|958355,AAG	YDR248C|chrIV;958397;958339|WT	74;3208;200;26;3;7;4;2;2;1667;405	1;1149;138;3;1;0;1;1;2;857;176	63.657,2868.032,182.517,21.767,3.000,5.224,3.005,1.555,1.538	0.860,1027.235,125.937.2.512,1.000,0.000,0.751,0.777,1.538	36.372	18.699	15.864	6.894	0.436	0.369	0.0907768	0.0991176	0.126818	0.00188014	0.00205173	5;3727;229;59;1;5;4;3;1;1556;338	252;920;0;1;91;1;0;1;1;875;232	4.972,3013.830,229.000,50.739,0.895,4.548,3.456,2.743,0.833	250.593,743.956,0.000.0.860,81.483,0.910,0.000,0.914,0.833	33.335	18.746	13.262	9.103	0.398	0.486	0.0907502	0.0953335	0.0710837	5.67e-26	7.2e-26
chrIV:958359-oORF	chrIV;958397;958339	oORF	Scer	N	NA	NA	NA	NA	38	NA	AGCGUAUGG	AUG	NA	NA	NA	NA	NA	YDR248C|chrIV;958397;958339|958359,AAG	YDR248C|chrIV;958397;958339|WT	5077;473;2;2;4;4;5;3;6;1403;41	1;1149;138;3;1;0;1;1;2;857;176	4367.355,422.874,1.825,1.674,4.000,2.985,3.756,2.332,4.614	0.860,1027.235,125.937.2.512,1.000,0.000,0.751,0.777,1.538	30.612	18.699	1.606	6.894	0.052	0.369	0.0179506	0.0991176	2.46511	0	0	2622;851;1;2;2;6;5;6;3;1878;75	252;920;0;1;91;1;0;1;1;875;232	2607.359,688.159,1.000,1.720,1.791,5.457,4.320,5.486,2.498	250.593,743.956,0.000.0.860,81.483,0.910,0.000,0.914,0.833	40.233	18.746	2.943	9.103	0.073	0.486	0.0268618	0.0953335	1.82743	6.91e-171	1.3e-170
chrIV:959859-959844	chrIV;959971;959802	uORF	Scer	N	0.00366667	0.00964706	0.00633333	15	112	42	GACUAAUGU	AUG	UUGUUAAAGUAA	0.917047	MLLK	UAA	GCAGUGCUUU	YDR249C|chrIV;959971;959802|959859,AAG	YDR249C|chrIV;959971;959802|WT	1907;3808;0;1;3;2;1;2;1;1556;0	7804;1444;1;2;2;7;4;5;7;2949;0	1640.446,3404.447,0.000,0.837,3.000,1.493,0.751,1.555,0.769	6713.184,1290.972,0.913.1.674,2.000,5.224,3.005,3.887,5.382	33.95	64.343	0	0	0	0	0.0556135	0.0218148	-1.35012	0	0	2358;3193;1;1;2;6;3;4;2;1546;208	5511;759;2;3;1;2;3;1;1;2729;293	2344.833,2582.012,1.000,0.860,1.791,5.457,2.592,3.657,1.665	5480.228,613.764,2.000.2.580,0.895,1.819,2.592,0.914,0.833	33.121	58.465	8.161	11.497	0.246	0.197	0.0439652	0.0156535	-1.48988	0	0
chrIV:959883-959868	chrIV;959971;959802	uORF	Scer	N	0.276333	0.134412	0.00366667	15	88	66	GAGUAAUGA	AUG	AAAUAUAUUUAA	1	MKYI	UAA	AGAGGACUAA	YDR249C|chrIV;959971;959802|959883,AAG	YDR249C|chrIV;959971;959802|WT	904;1150;0;0;2;3;3;1;0;1269;233	7804;1444;1;2;2;7;4;5;7;2949;0	777.642,1028.129,0.000,0.000,2.000,2.239,2.253,0.777,0.000	6713.184,1290.972,0.913.1.674,2.000,5.224,3.005,3.887,5.382	27.688	64.343	9.127	0	0.33	0	0.0507682	0.0218148	-1.21861	4.81e-162	8.94e-162	2259;432;0;1;1;0;0;1;1;942;181	5511;759;2;3;1;2;3;1;1;2729;293	2246.386,349.336,0.000,0.860,0.895,0.000,0.000,0.914,0.833	5480.228,613.764,2.000.2.580,0.895,1.819,2.592,0.914,0.833	20.181	58.465	7.102	11.497	0.352	0.197	0.0175665	0.0156535	-0.166346	0.0141976	0.0150171
chrIV:959890-oORF	chrIV;959971;959802	oORF	Scer	N	NA	NA	NA	NA	81	NA	UUGCGAUGA	AUG	NA	NA	NA	NA	NA	YDR249C|chrIV;959971;959802|959890,AAG	YDR249C|chrIV;959971;959802|WT	4317;4237;1;4;3;3;5;5;4;3449;19	7804;1444;1;2;2;7;4;5;7;2949;0	3713.585,3787.984,0.913,3.349,3.000,2.239,3.756,3.887,3.076	6713.184,1290.972,0.913.1.674,2.000,5.224,3.005,3.887,5.382	75.253	64.343	0.744	0	0.01	0	0.0448333	0.0218148	-1.03926	2.27e-297	5.06e-297	3767;4801;2;3;0;7;9;4;2;2265;75	5511;759;2;3;1;2;3;1;1;2729;293	3745.966,3882.318,2.000,2.580,0.000,6.367,7.776,3.657,1.665	5480.228,613.764,2.000.2.580,0.895,1.819,2.592,0.914,0.833	48.524	58.465	2.943	11.497	0.061	0.197	0.0426245	0.0156535	-1.4452	0	0
chrIX:100531-100510	chrIX;100555;100501	uORF	Scer	N	0.00633333	0.0109565	0.0233333	21	24	9	AAAAAAUGG	AUG	GAGAGAAGAGACUGCUAG	0.719187	MERRDC	UAG	CGGCAAAGGA	YIL132C|chrIX;100555;100501|100531,AAG	YIL132C|chrIX;100555;100501|WT	4;2;2;21;485;1497;2269;511;4;997;68	2725;323;50;9;0;0;1;5;2;1333;0	3.441,1.788,1.825,17.581,485.000,1117.291,1704.368,397.242,3.076	2344.109,288.770,45.629.7.535,0.000,0.000,0.751,3.887,1.538	21.753	29.084	2.664	0	0.122	0	0.761424	0.023276	-5.03178	0	0	5;2;1;46;880;1624;1731;306;113;1170;6	835;774;1;3;0;3;4;0;2;1028;0	4.972,1.617,1.000,39.559,787.966,1477.151,1495.624,279.788,94.095	830.338,625.893,1.000.2.580,0.000,2.729,3.456,0.000,1.665	25.066	22.023	0.235	0	0.009	0	0.741745	0.0410691	-4.1748	0	0
chrIX:113728-113740	chrIX;113721;113805	uORF	Scer	N	0.001	0.0146667	0.0313333	12	7	65	CCUCUAUGA	AUG	AUCAUCUAG	0.683613	MII	UAG	UUAUUAGCUG	YIL128W|chrIX;113721;113805|113728,AAG	YIL128W|chrIX;113721;113805|WT	28;10;20;370;2605;10529;12611;1478;393;10773;5050	37;542;10527;19307;1050;573;23;15;11;12437;5244	24.086,8.940,18.252,309.755,2605.000,7858.353,9472.801,1148.971,302.189	31.828,484.562,9606.776.16163.376,1050.000,427.660,17.277,11.661,8.458	235.053	271.359	197.81	205.409	0.842	0.757	0.751588	0.345888	-1.11964	0	0	21;48;62;13;1651;10607;3771;2034;23;8904;4580	21;248;12683;14351;3789;292;25;19;24;14135;5501	20.883,38.815,62.000,11.180,1478.331,9647.868,3258.232,1859.765,19.152	20.883,200.545,12683.000.12341.547,3392.730,265.596,21.601,17.372,19.985	190.755	302.821	179.709	215.847	0.942	0.713	0.739964	0.339608	-1.12359	0	0
chrIX:113733-113739	chrIX;113721;113805	uORF	Scer	N	0.00666667	0.0261667	0.036	6	12	66	UGAUCAUCU	AUC	UAG	1	M	UAG	UUAUUAGCUG	YIL128W|chrIX;113721;113805|113733,113739,AAG	YIL128W|chrIX;113721;113805|WT	607;13731;789;131;9;11;21;16;14;7510;1189	37;542;10527;19307;1050;573;23;15;11;12437;5244	522.156,12275.857,720.029,109.670,9.000,8.210,15.774,12.438,10.765	31.828,484.562,9606.776.16163.376,1050.000,427.660,17.277,11.661,8.458	163.858	271.359	46.573	205.409	0.284	0.757	0.0882888	0.345888	1.97	0	0	1734;14588;1062;11;6;18;17;10;6;7772;1431	21;248;12683;14351;3789;292;25;19;24;14135;5501	1724.318,11796.554,1062.000,9.460,5.372,16.372,14.688,9.143,4.996	20.883,200.545,12683.000.12341.547,3392.730,265.596,21.601,17.372,19.985	166.504	302.821	56.149	215.847	0.337	0.713	0.0788802	0.339608	2.10614	0	0
chrIX:117939-117954	chrIX;117909;117991	uORF	Scer	N	0.992333	0.957933	0.937	15	30	37	GGCUAAUUU	AUU	UGGUGGAAAUAA	1	MWWK	UAA	CAACACAAAG	YIL126W|chrIX;117909;117991|117939,117954,AAG	YIL126W|chrIX;117909;117991|WT	131;2230;22448;57695;14155;2406;223;64;378;41386;17890	115;487;14031;61235;18453;3877;613;137;75;44267;17712	112.689,1993.676,20485.694,48300.927,14155.000,1795.726,167.507,49.752,290.655	98.926,435.390,12804.471.51264.534,18453.000,2893.611,460.457,106.501,57.670	902.989	965.849	700.756	693.783	0.776	0.718	0.384274	0.414965	0.110856	0	0	115;996;20428;61669;18291;1678;82;67;789;44411;17403	80;1064;18426;65033;21113;2184;748;72;91;45045;17971	114.358,805.413,20428.000,53033.994,16378.050,1526.268,70.850,61.261,657.003	79.553,860.401,18426.000.55926.960,18904.913,1986.513,646.289,65.832,75.776	951.439	965.022	682.855	705.142	0.718	0.731	0.386215	0.393838	0.0281986	4.18e-54	6.02e-54
chrIX:117941-117980	chrIX;117909;117991	uORF	Scer	N	0.993	0.957436	0.985333	39	32	11	CUAAUUUGG	UUG	GUGGAAAUAACAACACAAAGAGGCAGCACAGUUUAG	0.765717	MVEITTQRGSTV	UAG	AGCAAGCGCG	YIL126W|chrIX;117909;117991|117941,117980,AAG	YIL126W|chrIX;117909;117991|WT	117;337;7599;39204;18363;4110;62;202;68;33692;13111	115;487;14031;61235;18453;3877;613;137;75;44267;17712	100.646,301.286,6934.729,32820.687,18363.000,3067.512,46.572,157.031,52.287	98.926,435.390,12804.471.51264.534,18453.000,2893.611,460.457,106.501,57.670	735.116	965.849	513.561	693.783	0.699	0.718	0.437441	0.414965	-0.0760962	4.85e-273	1.05e-272	214;447;6934;48727;20078;2924;613;99;62;34628;14574	80;1064;18426;65033;21113;2184;748;72;91;45045;17971	212.805,361.466,6934.000,41904.156,17978.158,2659.599,529.646,90.520,51.628	79.553,860.401,18426.000.55926.960,18904.913,1986.513,646.289,65.832,75.776	741.853	965.022	571.851	705.142	0.771	0.731	0.423451	0.393838	-0.104593	0	0
chrIX:141589-oORF	chrIX;141674;141569	oORF	Scer	Y	NA	NA	NA	NA	85	NA	AUAAAUUGA	UUG	NA	NA	NA	NA	NA	YIL117C|chrIX;141674;141569|141589,141565,AAG	YIL117C|chrIX;141674;141569|WT	13;14;5;13;10;20;924;5739;14904;9205;6029	13;12;5;6;9;10;1047;635;8618;4636;1951	11.183,12.516,4.563,10.883,10.000,14.927,694.066,4461.397,11460.101	11.183,10.728,4.563.5.023,9.000,7.464,786.458,493.638,6626.620	200.841	101.152	236.157	76.421	1.176	0.756	0.960862	0.971847	0.0164	6.67e-53	9.7e-53	23;10;10;114;14;12;503;2278;24819;7100;4600	7;29;4;3;6;13;246;1545;17039;3574;1565	22.872,8.086,10.000,98.038,12.536,10.915,434.604,2082.863,20666.853	6.961,23.451,4.000.2.580,5.372,11.824,212.550,1412.653,14188.424	152.107	76.568	180.494	61.407	1.187	0.802	0.985963	0.988919	0.00431976	0.102288	0.106205
chrIX:150019-oORF	chrIX;150021;149988	oORF	Scer	N	NA	NA	NA	NA	2	NA	ND-too-cl	AUG	NA	NA	NA	NA	NA	YIL114C|chrIX;150021;149988|150019,AAG	YIL114C|chrIX;150021;149988|WT	1;1;0;0;0;1;184;73;370;142;280	0;0;0;16;10;60;394;0;0;178;277	0.860,0.894,0.000,0.000,0.000,0.746,138.212,56.749,284.503	0.000,0.000,0.000.13.395,10.000,44.781,295.955,0.000,0.000	3.098	3.884	10.968	10.85	3.54	2.794	0.933797	0.790659	-0.240052	1.41e-79	2.22e-79	1;2;0;0;1;0;23;258;651;80;130	0;0;0;0;16;36;117;14;1;242;106	0.994,1.617,0.000,0.000,0.895,0.000,19.873,235.899,542.090	0.000,0.000,0.000.0.000,14.327,32.745,101.091,12.801,0.833	1.714	5.184	5.101	4.159	2.976	0.802	0.970942	0.795151	-0.288157	2.59e-80	4.06e-80
chrIX:160207-160192	chrIX;160273;160165	uORF	Scer	Y	0.992333	0.865235	0.669667	15	66	27	CCGCAUUGA	UUG	AAACAGACAUAA	0.800692	MKQT	UAA	AUAUAUAAGU	YIL109C|chrIX;160273;160165|160207,160192,AAG	YIL109C|chrIX;160273;160165|WT	19;13;104;5623;9886;4513;27;10;17;8705;10023	32;21;180;15097;9498;811;414;16;20;12348;10606	16.344,11.622,94.909,4707.446,9886.000,3368.292,20.281,7.774,13.072	27.527,18.775,164.265.12638.861,9498.000,605.292,310.978,12.438,15.379	189.932	269.417	392.603	415.44	2.067	1.542	0.537355	0.468709	-0.197183	0	0	12;748;134;4336;9444;3129;2251;22;24;8734;7063	26;20;447;12869;8147;473;29;11;18;11880;12653	11.933,604.869,134.000,3728.865,8456.307,2846.062,1944.917,20.115,19.985	25.855,16.173,447.000.11067.059,7294.952,430.229,25.057,10.058,14.989	187.113	254.511	277.136	496.476	1.481	1.951	0.552247	0.448408	-0.300501	0	0
chrIX:187685-oORF	chrIX;187697;187632	oORF	Scer	N	NA	NA	NA	NA	12	NA	CGAUUAUUA	AUU	NA	NA	NA	NA	NA	YIL094C|chrIX;187697;187632|187685,187632,AAG	YIL094C|chrIX;187697;187632|WT	6;4;3;2;157;2336;4399;4171;1993;1807;3418	2;5;4;2;142;664;2178;200;3;1357;1617	5.161,3.576,2.738,1.674,157.000,1743.481,3304.326,3242.462,1532.473	1.720,4.470,3.650.1.674,142.000,495.579,1636.013,155.476,2.307	39.426	29.608	133.884	63.338	3.396	2.139	0.849565	0.790593	-0.103788	1.1e-196	2.17e-196	9;4;3;4;77;838;4279;1055;1551;1715;2795	2;2;3;2;195;1492;1329;358;3;1147;1498	8.950,3.235,3.000,3.440,68.947,762.224,3697.156,964.627,1291.522	1.989,1.617,3.000.1.720,174.606,1357.087,1148.287,327.333,2.498	36.741	24.573	109.67	58.778	2.985	2.392	0.863492	0.771128	-0.163212	0	0
chrIX:187693-187675	chrIX;187697;187632	uORF	Scer	Y	0.000333333	0.00065	0.000333333	18	4	43	ND-too-cl	AUG	CGAUUAUUAUAUUAG	0.679885	MRLLY	UAG	UGCGACAUAU	YIL094C|chrIX;187697;187632|187693,187675,AAG	YIL094C|chrIX;187697;187632|WT	2;2;1;1;0;114;4;1412;1080;651;2366	2;5;4;2;142;664;2178;200;3;1357;1617	1.720,1.788,0.913,0.837,0.000,85.084,3.005,1097.664,830.442	1.720,4.470,3.650.1.674,142.000,495.579,1636.013,155.476,2.307	14.204	29.608	92.677	63.338	6.525	2.139	0.925127	0.790593	-0.226715	0	0	1;3;2;0;1;1;590;1233;2141;915;987	2;2;3;2;195;1492;1329;358;3;1147;1498	0.994,2.426,2.000,0.000,0.895,0.910,509.774,1127.379,1782.817	1.989,1.617,3.000.1.720,174.606,1357.087,1148.287,327.333,2.498	19.603	24.573	38.728	58.778	1.976	2.392	0.950923	0.771128	-0.302359	0	0
chrIX:188990-oORF	chrIX;188987;189065	oORF	Scer	N	NA	NA	NA	NA	3	NA	ND-too-cl	AUG	NA	NA	NA	NA	NA	YIL092W|chrIX;188987;189065|188990,AAG	YIL092W|chrIX;188987;189065|WT	10315;5432;169;6;293;5;195;10;18;6978;3077	18486;9343;137;87;19;84;34;17;15;14451;3264	8873.205,4856.344,154.227,5.023,293.000,3.732,146.475,7.774,13.841	15902.091,8352.875,125.024.72.834,19.000,62.694,25.539,13.215,11.534	152.251	315.302	120.527	127.852	0.792	0.405	0.0553022	0.0379505	-0.543218	1.15e-10	1.36e-10	6531;5402;255;54;7;7;103;11;13;6551;3137	14312;8885;101;169;62;19;28;16;21;12705;3591	6494.532,4368.315,255.000,46.439,6.268,6.367,88.994,10.058,10.825	14232.085,7184.836,101.000.145.336,55.516,17.282,24.193,14.629,17.487	140.345	272.186	123.089	140.903	0.877	0.518	0.0484716	0.0368117	-0.396977	1.34e-35	1.78e-35
chrIX:188997-189006	chrIX;188987;189065	uORF	Scer	N	0.00133333	0.00344444	0.003	9	10	59	GAAAAAUGU	AUG	UCAUAA	0.902986	MS	UAA	AAAAGCAGUA	YIL092W|chrIX;188987;189065|188997,AAG	YIL092W|chrIX;188987;189065|WT	638;11159;577;107;265;10;17;11;7;6940;1389	18486;9343;137;87;19;84;34;17;15;14451;3264	548.823,9976.425,526.561,89.578,265.000,7.464,12.770,8.551,5.382	15902.091,8352.875,125.024.72.834,19.000,62.694,25.539,13.215,11.534	151.422	315.302	54.407	127.852	0.359	0.405	0.0967442	0.0379505	-1.35006	0	0	1238;13911;1108;8;7;18;13;9;14;5351;2349	14312;8885;101;169;62;19;28;16;21;12705;3591	1231.087,11249.100,1108.000,6.880,6.268,16.372,11.232,8.229,11.658	14232.085,7184.836,101.000.145.336,55.516,17.282,24.193,14.629,17.487	114.637	272.186	92.17	140.903	0.804	0.518	0.0824868	0.0368117	-1.164	0	0
chrIX:193475-193484	chrIX;193456;193594	uORF	Scer	N	0.915333	0.944222	0.967	9	19	110	GGUGGAUCU	AUC	UUAUAG	0.996422	ML	UAG	UAUUCGUGAA	YIL090W|chrIX;193456;193594|193475,193484,AAG	YIL090W|chrIX;193456;193594|WT	1;3;12;1673;2977;1217;8;4;6;1866;0	10;7;525;6059;7367;1747;420;10;6;7109;0	0.860,2.682,10.951,1400.597,2977.000,908.312,6.009,3.110,4.614	8.602,6.258,479.107.5072.455,7367.000,1303.879,315.485,7.774,4.614	40.714	155.109	0	0	0	0	0.535998	0.504987	-0.0859819	7.72e-56	1.13e-55	4;3;204;3222;3357;259;8;3;5;3293;57	12;10;118;7137;5938;1283;12;7;10;6672;137	3.978,2.426,204.000,2770.850,3005.911,235.580,6.912,2.743,4.164	11.933,8.086,118.000.6137.664,5316.979,1166.985,10.368,6.400,8.327	70.548	142.938	2.237	5.376	0.032	0.038	0.469742	0.47917	0.0286702	0.0027792	0.00297722
chrIX:193546-193588	chrIX;193456;193594	uORF	Scer	N	0.977667	0.997643	0.997	42	90	6	GAUCUAUUA	AUU	AGAGAGGUGCUGUUUGUGGCCGAUCACGCUAAAGAUUAG	0.720628	MREVLFVADHAKD	UAG	GCAACGATGA	YIL090W|chrIX;193456;193594|193546,193588,AAG	YIL090W|chrIX;193456;193594|WT	13;7;925;9879;2806;1413;5;8;9;4355;0	10;7;525;6059;7367;1747;420;10;6;7109;0	11.183,6.258,844.141,8270.472,2806.000,1054.597,3.756,6.219,6.920	8.602,6.258,479.107.5072.455,7367.000,1303.879,315.485,7.774,4.614	95.02	155.109	0	0	0	0	0.441521	0.504987	0.193766	0	0	9;6;1142;7292;2330;1016;5;11;7;4184;35	12;10;118;7137;5938;1283;12;7;10;6672;137	8.950,4.852,1142.000,6270.961,2086.319,924.129,4.320,10.058,5.829	11.933,8.086,118.000.6137.664,5316.979,1166.985,10.368,6.400,8.327	89.636	142.938	1.373	5.376	0.015	0.038	0.428044	0.47917	0.162779	5.32e-230	1.09e-229
chrIX:202054-oORF	chrIX;202090;202043	oORF	Scer	N	NA	NA	NA	NA	36	NA	AUUAGAUGC	AUG	NA	NA	NA	NA	NA	YIL085C|chrIX;202090;202043|202054,AAG	YIL085C|chrIX;202090;202043|WT	0;2;1;1;4;48;554;487;517;446;46	4;1;729;435;68;0;2;0;1;664;297	0.000,1.788,0.913,0.837,4.000,35.825,416.139,378.585,397.536	3.441,0.894,665.274.364.172,68.000,0.000,1.502,0.000,0.769	9.731	14.488	1.802	11.634	0.185	0.803	0.896479	0.312947	-1.51835	0	0	0;0;0;0;1;0;0;938;892;333;106	1;3;682;638;11;2;2;20;1;1136;139	0.000,0.000,0.000,0.000,0.895,0.000,0.000,857.650,742.771	0.994,2.426,682.000.548.666,9.850,1.819,1.728,18.287,0.833	7.134	24.337	4.159	5.454	0.583	0.224	0.961462	0.314329	-1.61295	0	0
chrIX:267854-oORF	chrIX;267855;267823	oORF	Scer	N	NA	NA	NA	NA	1	NA	ND-too-cl	AUG	NA	NA	NA	NA	NA	YIL047C|chrIX;267855;267823|267854,AAG	YIL047C|chrIX;267855;267823|WT	0;0;0;0;144;49;0;0;0;152;227	1;113;0;0;0;0;1;0;2;86;31	0.000,0.000,0.000,0.000,144.000,36.571,0.000,0.000,0.000	0.860,101.025,0.000.0.000,0.000,0.000,0.751,0.000,1.538	3.316	1.876	8.892	1.214	2.682	0.647	0.583582	0.100176	-2.5424	1.19e-40	1.66e-40	0;0;16;45;191;112;0;1;0;88;356	1;160;17;0;2;0;0;0;0;191;85	0.000,0.000,16.000,38.699,171.024,101.872,0.000,0.914,0.000	0.994,129.384,17.000.0.000,1.791,0.000,0.000,0.000,0.000	1.885	4.092	13.969	3.335	7.411	0.815	0.562149	0.0971828	-2.53218	3.89e-67	5.86e-67
chrIX:278406-oORF	chrIX;278399;278425	oORF	Scer	N	NA	NA	NA	NA	7	NA	CAGCAUUGU	UUG	NA	NA	NA	NA	NA	YIL039W|chrIX;278399;278425|278406,278425,AAG	YIL039W|chrIX;278399;278425|WT	1;4;1;0;0;0;140;0;42;109;169	0;0;0;0;0;9;52;55;41;92;12	0.860,3.576,0.913,0.000,0.000,0.000,105.162,0.000,32.295	0.000,0.000,0.000.0.000,0.000,6.717,39.060,42.756,31.526	2.378	2.007	6.62	0.47	2.784	0.234	0.838574	0.889066	0.0843532	7.73e-05	8.61e-05	0;0;1;0;0;0;91;65;133;124;51	0;1;0;0;0;124;223;0;289;85;66	0.000,0.000,1.000,0.000,0.000,0.000,78.626,59.432,110.749	0.000,0.809,0.000.0.000,0.000,112.787,192.677,0.000,240.651	2.657	1.821	2.001	2.59	0.753	1.422	0.927186	0.88185	-0.0723245	9.34e-06	1.03e-05
chrIX:292603-oORF	chrIX;292462;292632	oORF	Scer	N	NA	NA	NA	NA	141	NA	UAUCUAUGU	AUG	NA	NA	NA	NA	NA	YIL031W|chrIX;292462;292632|292603,292632,AAG	YIL031W|chrIX;292462;292632|WT	8;718;4835;1534;0;4;8;3;3;2814;212	607;8303;276;5;2;14;13;7;3;4237;501	6.882,641.910,4412.345,1284.230,0.000,2.985,6.009,2.332,2.307	522.156,7423.089,251.873.4.186,2.000,10.449,9.765,5.442,2.307	61.398	92.446	8.304	19.624	0.135	0.212	0.259017	0.0802086	-1.69122	0	0	0;147;4983;738;1;4;5;4;2;2799;982	1220;9477;131;67;5;5;6;2;4;3795;1146	0.000,118.871,4983.000,634.664,0.895,3.638,4.320,3.657,1.665	1213.188,7663.555,131.000.57.619,4.477,4.548,5.184,1.829,3.331	59.964	81.302	38.531	44.966	0.643	0.553	0.252062	0.0690607	-1.86784	0	0
chrIX:301301-301280	chrIX;301362;301257	uORF	Scer	N	0.109333	0.031913	0.00833333	21	61	23	UAAGGAUGC	AUG	CUGUAUUACCGCCGUUAG	0.473772	MLYYRR	UAG	CCAUCAGAAU	YIL029C|chrIX;301362;301257|301301,AAG	YIL029C|chrIX;301362;301257|WT	18871;4235;5;4;9;23;13;10;18;9375;1146	22528;2942;10;86;11;15;23;14;12;12785;2032	16233.277,3786.196,4.563,3.349,9.000,17.166,9.765,7.774,13.841	19379.114,2630.221,9.126.71.997,11.000,11.195,17.277,10.883,9.227	204.55	278.952	44.889	79.594	0.219	0.285	0.0237406	0.0200994	-0.240206	1.23e-31	1.65e-31	16511;6162;10;389;314;17;20;10;390;7984;891	29366;3953;55;125;24;13;15;7;15;12399;1941	16418.806,4982.888,10.000,334.532,281.161,15.463,17.280,9.143,324.754	29202.026,3196.585,55.000.107.497,21.490,11.824,12.960,6.400,12.491	171.045	265.63	34.961	76.161	0.204	0.287	0.0505217	0.0173321	-1.54346	1.75e-237	3.63e-237
chrIX:301327-301303	chrIX;301362;301257	uORF	Scer	Y	0.002	0.0132692	0.103333	24	35	46	GGCAAAUGA	AUG	AACUAUUCCCGCUCUUCGUAA	0.567548	MNYSRSS	UAA	GGAUGCUGUA	YIL029C|chrIX;301362;301257|301327,301303,AAG	YIL029C|chrIX;301362;301257|WT	63;390;8980;3085;199;69;18;8;9;8500;11078	22528;2942;10;86;11;15;23;14;12;12785;2032	54.194,348.670,8195.008,2582.691,199.000,51.498,13.521,6.219,6.920	19379.114,2630.221,9.126.71.997,11.000,11.195,17.277,10.883,9.227	185.459	278.952	433.928	79.594	2.34	0.285	0.280933	0.0200994	-3.805	0	0	7;499;8055;3874;106;11;14;12;10;8081;9840	29366;3953;55;125;24;13;15;7;15;12399;1941	6.961,403.515,8055.000,3331.555,94.914,10.005,12.096,10.972,8.327	29202.026,3196.585,55.000.107.497,21.490,11.824,12.960,6.400,12.491	173.123	265.63	386.1	76.161	2.23	0.287	0.276955	0.0173321	-3.99813	0	0
chrIX:301350-301323	chrIX;301362;301257	uORF	Scer	N	0.0153333	0.00493103	0.00133333	27	12	66	CAGUUAUGC	AUG	CAAACCAUCAAAGAGGGCAAAUGA	0.709499	MQTIKEGK	UGA	ACUAUUCCCG	YIL029C|chrIX;301362;301257|301350,AAG	YIL029C|chrIX;301362;301257|WT	19383;3584;298;246;15;19;498;8;12;12247;1331	22528;2942;10;86;11;15;23;14;12;12785;2032	16673.711,3204.186,271.950,205.946,15.000,14.181,374.075,6.219,9.227	19379.114,2630.221,9.126.71.997,11.000,11.195,17.277,10.883,9.227	267.214	278.952	52.136	79.594	0.195	0.285	0.0423517	0.0200994	-1.07527	9.47e-43	1.33e-42	16530;3956;12;125;94;18;13;12;9;12407;2309	29366;3953;55;125;24;13;15;7;15;12399;1941	16437.700,3199.011,12.000,107.497,84.169,16.372,11.232,10.972,7.494	29202.026,3196.585,55.000.107.497,21.490,11.824,12.960,6.400,12.491	265.801	265.63	90.6	76.161	0.341	0.287	0.0246398	0.0173321	-0.507545	5.75e-40	7.77e-40
chrIX:301961-302027	chrIX;301958;302099	uORF	Scer	N	0.032	0.315485	0.796333	66	3	72	ND-too-cl	AUG	CCUAAUUACUCAAAGCUGUAUUUAACUAAUUUACCUAUACUAUCGCCAGGCAUUCAAGGAUGA	0.752262	MPNYSKLYLTNLPILSPGIQG	UGA	AGACAUGCGU	YIL028W|chrIX;301958;302099|301961,AAG	YIL028W|chrIX;301958;302099|WT	18587;1555;4;312;28;16;25;16;11;11351;951	30070;1528;6;4;10;20;18;12;25;9706;0	15988.974,1390.209,3.650,261.199,28.000,11.942,18.779,12.438,8.458	25866.920,1366.070,5.476.3.349,10.000,14.927,13.521,9.329,19.223	247.664	211.772	37.251	0	0.15	0	0.0228777	0.0140503	-0.703338	1.86e-16	2.29e-16	20998;6094;11;5;20;14;12;11;10;11104;596	15646;3596;7;10;11;18;17;13;16;9612;484	20880.751,4927.900,11.000,4.300,17.908,12.734,10.368,10.058,8.327	15558.636,2907.897,7.000.8.600,9.850,16.372,14.688,11.886,13.323	237.887	205.923	23.386	18.991	0.098	0.092	0.0220176	0.0211178	-0.0601975	1.16e-08	1.32e-08
chrIX:302023-oORF	chrIX;301958;302099	oORF	Scer	N	NA	NA	NA	NA	65	NA	CAAGGAUGA	AUG	NA	NA	NA	NA	NA	YIL028W|chrIX;301958;302099|302023,AAG	YIL028W|chrIX;301958;302099|WT	29357;406;328;204;10;19;24;63;10;9613;180	30070;1528;6;4;10;20;18;12;25;9706;0	25253.580,362.974,299.328,170.784,10.000,14.181,18.028,48.975,7.689	25866.920,1366.070,5.476.3.349,10.000,14.927,13.521,9.329,19.223	209.743	211.772	7.051	0	0.034	0	0.0178011	0.0140503	-0.341364	0.0011539	0.00126359	25879;6357;8;72;6;25;9;5;21;12133;860	15646;3596;7;10;11;18;17;13;16;9612;484	25734.497,5140.574,8.000,61.918,5.372,22.739,7.776,4.572,17.487	15558.636,2907.897,7.000.8.600,9.850,16.372,14.688,11.886,13.323	259.931	205.923	33.744	18.991	0.13	0.092	0.0208381	0.0211178	0.0192371	0.108844	0.112837
chrIX:302031-302049	chrIX;301958;302099	uORF	Scer	N	0.584667	0.544833	0.494333	18	73	50	AAGACAUGC	AUG	CGUCAAUGCAAAUAG	0.709375	MRQCK	UAG	UGACGGCUGC	YIL028W|chrIX;301958;302099|302031,AAG	YIL028W|chrIX;301958;302099|WT	25711;858;4;8;304;7;15;13;12;8511;0	30070;1528;6;4;10;20;18;12;25;9706;0	22117.206,767.073,3.650,6.697,304.000,5.224,11.267,10.106,9.227	25866.920,1366.070,5.476.3.349,10.000,14.927,13.521,9.329,19.223	185.699	211.772	0	0	0	0	0.0194382	0.0140503	-0.468287	0.43612	0.45013	12770;1650;3;6;12;16;20;11;11;9154;688	15646;3596;7;10;11;18;17;13;16;9612;484	12698.695,1334.269,3.000,5.160,10.745,14.553,17.280,10.058,9.160	15558.636,2907.897,7.000.8.600,9.850,16.372,14.688,11.886,13.323	196.111	205.923	26.996	18.991	0.138	0.092	0.0178154	0.0211178	0.245338	3.16e-21	3.91e-21
chrIX:302039-302087	chrIX;301958;302099	uORF	Scer	N	0.572	0.722167	0.95	48	81	12	CGUCAAUGC	AUG	CAAAUAGUGACGGCUGCUGCAUUAAAGAGGUGCUGCGUGGUGUAG	0.676143	MQIVTAAALKRCCVV	UAG	AAAAGGCAAU	YIL028W|chrIX;301958;302099|302039,AAG	YIL028W|chrIX;301958;302099|WT	14558;363;3;4;172;3;6;8;9;6173;0	30070;1528;6;4;10;20;18;12;25;9706;0	12523.133,324.531,2.738,3.349,172.000,2.239,4.507,6.219,6.920	25866.920,1366.070,5.476.3.349,10.000,14.927,13.521,9.329,19.223	134.687	211.772	0	0	0	0	0.019005	0.0140503	-0.435771	0.052392	0.0554442	12762;1074;256;8;6;6;9;8;4;7347;281	15646;3596;7;10;11;18;17;13;16;9612;484	12690.739,868.488,256.000,6.880,5.372,5.457,7.776,7.315,3.331	15558.636,2907.897,7.000.8.600,9.850,16.372,14.688,11.886,13.323	157.399	205.923	11.026	18.991	0.07	0.092	0.0182111	0.0211178	0.213641	2.19e-30	2.84e-30
chrIX:304144-oORF	chrIX;304147;304104	oORF	Scer	N	NA	NA	NA	NA	3	NA	ND-too-cl	AUU	NA	NA	NA	NA	NA	YIL027C|chrIX;304147;304104|304144,304104,AAG	YIL027C|chrIX;304147;304104|WT	0;0;0;0;0;0;0;1;385;61;0	1;2;0;1;0;35;254;172;688;378;28	0.000,0.000,0.000,0.000,0.000,0.000,0.000,0.777,296.037	0.860,1.788,0.000.0.837,0.000,26.122,190.793,133.710,529.022	1.331	8.247	0	1.097	0	0.133	0.99963	0.934126	-0.0977776	5.54e-25	7.13e-25	0;0;1;0;0;0;108;0;89;23;21	0;2;0;0;37;1;86;427;589;353;70	0.000,0.000,1.000,0.000,0.000,0.000,93.315,0.000,74.111	0.000,1.617,0.000.0.000,33.130,0.910,74.306,390.423,490.462	0.493	7.562	0.824	2.747	1.671	0.363	0.903834	0.942289	0.0601118	7.68e-08	8.63e-08
chrIX:311106-oORF	chrIX;311055;311164	oORF	Scer	N	NA	NA	NA	NA	51	NA	UUAUAGUGU	GUG	NA	NA	NA	NA	NA	YIL022W|chrIX;311055;311164|311106,311164,AAG	YIL022W|chrIX;311055;311164|WT	82;43;817;30763;35117;5121;693;48;47;30987;27437	102;255;318;11130;40578;28343;7418;62;63;33761;29499	70.538,38.443,745.581,25754.076,35117.000,3822.075,520.550,37.314,36.140	87.743,227.976,290.202.9317.780,40578.000,21153.889,5572.059,48.198,48.442	676.096	736.621	1074.71	1155.48	1.59	1.569	0.495807	0.592982	0.258211	0	0	68;222;1362;30588;29232;6073;755;321;43;28745;23592	79;80;702;10578;48631;21346;3402;350;56;35298;24356	67.620,179.520,1362.000,26305.012,26174.794,5523.853,652.338,293.503,35.806	78.559,64.692,702.000.9096.849,43544.964,19415.801,2939.407,320.019,46.631	615.819	756.207	925.697	955.675	1.503	1.264	0.486038	0.577554	0.248887	0	0
chrIX:312878-312890	chrIX;312842;312904	uORF	Scer	N	0	0.011	0.01	12	36	14	CAGCGUUGA	UUG	AAAAACUAA	0.878439	MKN	UAA	AACAAUAUUG	YIL021W|chrIX;312842;312904|312878,312890,AAG	YIL021W|chrIX;312842;312904|WT	1;4;0;0;244;237;938;2;2;650;72	4;2;3;32;0;77;1061;2533;2296;1406;747	0.860,3.576,0.000,0.000,244.000,176.886,704.582,1.555,1.538	3.441,1.788,2.738.26.790,0.000,57.469,796.974,1969.109,1765.458	14.182	30.677	2.82	29.26	0.199	0.954	0.748732	0.914981	0.289293	0	0	1;0;1;0;130;815;952;1;3;947;446	7;6;1;1;1;3;935;1967;1613;1172;1063	0.994,0.000,1.000,0.000,116.404,741.304,822.550,0.914,2.498	6.961,4.852,1.000.0.860,0.895,2.729,807.862,1798.504,1343.150	20.288	25.108	17.5	41.71	0.863	1.661	0.760782	0.931532	0.292123	0	0
chrIX:321035-320990	chrIX;321035;320965	uORF	Scer	N	0.936667	0.341426	0.00866667	45	0	25	ND-too-cl	AUG	GCGGAAACUUGCAGUUUUCCUGUAUCAUUGCCCUCGUGUUAG	0.692069	MAETCSFPVSLPSC	UAG	AUUGGUGAUA	YIL017C|chrIX;321035;320965|321035,AAG	YIL017C|chrIX;321035;320965|WT	8;12;50;76;1218;4887;6470;1999;297;4770;10555	88;6015;5789;223;96;12;10;8;9;5595;2083	6.882,10.728,45.629,63.625,1218.000,3647.428,4859.965,1553.987,228.372	75.700,5377.560,5282.951.186.690,96.000,8.956,7.512,6.219,6.920	104.075	122.076	413.442	81.592	3.973	0.668	0.769341	0.168459	-2.19123	0	0	16;14;4;6;1955;4479;3482;1149;173;4770;9926	18;8576;4170;108;186;121;7;9;8;5239;3660	15.911,11.321,4.000,5.160,1750.538,4073.989,3008.529,1050.575,144.058	17.899,6934.964,4170.000.92.878,166.547,110.059,6.048,8.229,6.662	102.19	112.238	389.474	143.61	3.811	1.28	0.744197	0.148908	-2.32126	0	0
chrIX:342513-342522	chrIX;342473;342535	uORF	Scer	N	0.001	0.000444444	0.000333333	9	40	13	ACGAGAUAG	AUA	GGUUAA	1	MG	UAA	UAGCAAAAUC	YIL008W|chrIX;342473;342535|342513,342522,AAG	YIL008W|chrIX;342473;342535|WT	9;9;3;8;187;1348;4962;2482;1271;2653;1728	7;7;2;42;212;2132;4817;381;55;2375;997	7.742,8.046,2.738,6.697,187.000,1006.084,3727.225,1929.463,977.307	6.022,6.258,1.825.35.161,212.000,1591.225,3618.308,296.183,42.291	57.885	51.819	67.686	39.053	1.169	0.754	0.841962	0.787247	-0.0969388	2.71e-299	6.05e-299	15;11;4;2;384;1709;5038;1506;102;2715;1136	5;9;4;4;341;2351;4420;1061;398;2762;652	14.916,8.895,4.000,1.720,343.840,1554.465,4352.950,1376.994,84.936	4.972,7.278,4.000.3.440,305.337,2138.412,3818.983,970.113,331.416	58.165	59.172	44.574	25.583	0.766	0.432	0.815385	0.807515	-0.0139931	1.43e-11	1.66e-11
chrIX:360837-360852	chrIX;360836;360884	uORF	Scer	N	0.00466667	0.0018	0.00133333	15	1	32	ND-too-cl	AUG	UUUUGUUGGUGA	1	MFCW	UGA	UCUAACAGGA	YIR003W|chrIX;360836;360884|360837,AAG	YIR003W|chrIX;360836;360884|WT	1;2;0;0;67;499;535;441;325;576;1881	0;0;455;442;54;3;0;1;1;456;1489	0.860,1.788,0.000,0.000,67.000,372.430,401.867,342.826,249.902	0.000,0.000,415.226.370.032,54.000,2.239,0.000,0.777,0.769	12.568	9.949	73.679	58.324	5.862	5.862	0.828506	0.331979	-1.31942	0	0	4;2;0;0;29;674;739;321;213;530;2101	0;0;312;500;82;4;1;26;1;566;1162	3.978,1.617,0.000,0.000,25.967,613.054,638.513,293.503,177.366	0.000,0.000,312.000.429.989,73.424,3.638,0.864,23.773,0.833	11.354	12.126	82.439	45.594	7.261	3.76	0.817691	0.36105	-1.17936	0	0
chrIX:382566-382572	chrIX;382531;382627	uORF	Scer	N	0.00366667	0.00333333	0.002	6	35	55	AGGUAAUGU	AUG	UAG	1	M	UAG	GAUUCCGUCU	YIR016W|chrIX;382531;382627|382566,AAG	YIR016W|chrIX;382531;382627|WT	1553;29140;2969;539;15;32;34;28;21;19186;2007	33286;3985;10;12;19;19;165;22;22;16968;1423	1335.927,26051.888,2709.463,451.238,15.000,23.883,25.539,21.767,16.147	28633.398,3562.690,9.126.10.046,19.000,14.181,123.940,17.102,16.916	418.614	370.22	78.615	55.739	0.188	0.151	0.0954046	0.0209446	-2.18748	0	0	1009;34023;4531;195;20;28;44;26;24;16824;3002	30663;4316;251;46;86;22;33;16;30;18581;1755	1003.366,27512.624,4531.000,167.696,17.908,25.468,38.017,23.773,19.985	30491.784,3490.124,251.000.39.559,77.006,20.011,28.513,14.629,24.981	360.429	398.07	117.792	68.862	0.327	0.173	0.0965555	0.0199596	-2.27428	0	0
chrIX:393735-393720	chrIX;393746;393675	uORF	Scer	N	0.525333	0.724353	0.929333	15	11	45	UCGUCAUGU	AUG	UUGUGGUUCUAA	0.909253	MLWF	UAA	UUAAAAUAUA	YIR019C|chrIX;393746;393675|393735,AAG	YIR019C|chrIX;393746;393675|WT	14;11;10;6;51;1716;7478;5130;1208;5435;5509	5831;3233;391;179;8;6;13;8;6;6300;1550	12.043,9.834,9.126,5.023,51.000,1280.742,5617.128,3987.971,928.865	5015.963,2890.383,356.820.149.855,8.000,4.478,9.765,6.219,4.614	118.585	137.458	215.789	60.714	1.82	0.442	0.847372	0.0517481	-4.03342	0	0	21;10;8;13;343;1216;7817;7796;2689;6469;6979	7202;6562;518;123;106;8;15;6;6;6228;1632	20.883,8.086,8.000,11.180,307.128,1106.044,6754.070,7128.184,2239.138	7161.785,5306.347,518.000.105.777,94.914,7.277,12.960,5.486,4.996	138.589	133.426	273.84	64.036	1.976	0.48	0.881221	0.0513613	-4.10075	0	0
chrIX:397250-397262	chrIX;397241;397293	uORF	Scer	N	0.146333	0.227	0.189333	12	9	31	CAGCAAUGG	AUG	GAAGUAUAG	0.824612	MEV	UAG	GUUGGUAUUG	YIR021W|chrIX;397241;397293|397250,AAG	YIR021W|chrIX;397241;397293|WT	6;6;2;2;3;153;461;1296;1863;1320;3134	526;1613;19;0;21;77;3;1;1;1159;1452	5.161,5.364,1.825,1.674,3.000,114.192,346.282,1007.488,1432.513	452.478,1442.062,17.339.0.000,21.000,57.469,2.253,0.777,0.769	28.801	25.288	122.76	56.875	4.262	2.249	0.925071	0.0880991	-3.39236	0	0	3;2;0;1;7;31;620;1791;2546;1228;3682	725;1538;87;100;93;3;3;2;1;1227;1194	2.983,1.617,0.000,0.860,6.268,28.197,535.694,1637.580,2120.062	720.952,1243.700,87.000.85.998,83.274,2.729,2.592,1.829,0.833	26.308	26.287	144.473	46.85	5.492	1.782	0.949455	0.0904093	-3.39256	0	0
chrIX:410721-410787	chrIX;410713;410806	uORF	Scer	N	0.228	0.0285303	0.00266667	66	8	19	AAGGAAUGG	AUG	GAAGUGCAUUUUGCUAUGAUAUGGGGAAAUUAUGAAGCCGAUCAAACAAUUAAUUGUAUCUAA	0.863175	MEVHFAMIWGNYEADQTINCI	UAA	UCGGUCUCUU	YIR029W|chrIX;410713;410806|410721,AAG	YIR029W|chrIX;410713;410806|WT	16803;2575;198;151;3;15;21;13;15;7999;1162	7640;251;111;5;5;153;9;8;6;5379;111	14454.335,2302.114,180.692,126.414,3.000,11.195,15.774,10.106,11.534	6572.107,224.400,101.297.4.186,5.000,114.192,6.760,6.219,4.614	174.528	117.363	45.516	4.348	0.261	0.037	0.0255806	0.0286861	0.165297	4.64e-25	5.98e-25	11545;6702;270;5;3;10;8;10;21;7721;1106	7349;2025;198;2;53;9;4;5;10;5573;491	11480.535,5419.558,270.000,4.300,2.686,9.096,6.912,9.143,17.487	7307.965,1637.512,198.000.1.720,47.457,8.186,3.456,4.572,8.327	165.411	119.393	43.397	19.266	0.262	0.161	0.0340535	0.0295807	-0.203144	3.52e-58	5.15e-58
chrIX:410730-410742	chrIX;410713;410806	uORF	Scer	N	0.104	0.0215	0.006	12	17	64	AGUGCAUUU	AUU	UUGCUAUGA	0.79933	MLL	UGA	UAUGGGGAAA	YIR029W|chrIX;410713;410806|410730,410742,AAG	YIR029W|chrIX;410713;410806|WT	7840;1012;7;2;4;8;3;4;4;3960;801	7640;251;111;5;5;153;9;8;6;5379;111	6744.152,904.753,6.388,1.674,4.000,5.971,2.253,3.110,3.076	6572.107,224.400,101.297.4.186,5.000,114.192,6.760,6.219,4.614	86.402	117.363	31.375	4.348	0.363	0.037	0.018977	0.0286861	0.596094	9.12e-08	1.05e-07	5875;2289;1;5;7;5;8;5;7;4148;590	7349;2025;198;2;53;9;4;5;10;5573;491	5842.195,1850.995,1.000,4.300,6.268,4.548,6.912,4.572,5.829	7307.965,1637.512,198.000.1.720,47.457,8.186,3.456,4.572,8.327	88.865	119.393	23.15	19.266	0.261	0.161	0.0264992	0.0295807	0.158711	0.00062518	0.00067512
chrIX:410739-410787	chrIX;410713;410806	uORF	Scer	N	0.00633333	0.0020625	0.00266667	48	26	19	UUGCUAUGA	AUG	AUAUGGGGAAAUUAUGAAGCCGAUCAAACAAUUAAUUGUAUCUAA	0.852476	MIWGNYEADQTINCI	UAA	UCGGUCUCUU	YIR029W|chrIX;410713;410806|410739,AAG	YIR029W|chrIX;410713;410806|WT	2285;842;2;3;3;4;4;2;6;2281;1	7640;251;111;5;5;153;9;8;6;5379;111	1965.611,752.769,1.825,2.512,3.000,2.985,3.005,1.555,4.614	6572.107,224.400,101.297.4.186,5.000,114.192,6.760,6.219,4.614	49.768	117.363	0.039	4.348	0.001	0.037	0.0328938	0.0286861	-0.197468	5.41e-57	7.98e-57	4671;1209;119;1;0;3;4;1;3;3062;678	7349;2025;198;2;53;9;4;5;10;5573;491	4644.918,977.655,119.000,0.860,0.000,2.729,3.456,0.914,2.498	7307.965,1637.512,198.000.1.720,47.457,8.186,3.456,4.572,8.327	65.599	119.393	26.603	19.266	0.406	0.161	0.0252107	0.0295807	0.230625	0.103	0.107
chrIX:410744-410759	chrIX;410713;410806	uORF	Scer	N	0	0.00113333	0.001	15	31	47	AUGAUAUGG	AUG	GGGAAAUUAUGA	0.718305	MGKL	UGA	AGCCGAUCAA	YIR029W|chrIX;410713;410806|410744,AAG	YIR029W|chrIX;410713;410806|WT	5809;627;3;4;3;4;5;3;2;2606;1	7640;251;111;5;5;153;9;8;6;5379;111	4997.038,560.554,2.738,3.349,3.000,2.985,3.756,2.332,1.538	6572.107,224.400,101.297.4.186,5.000,114.192,6.760,6.219,4.614	56.86	117.363	0.039	4.348	0.001	0.037	0.0178737	0.0286861	0.682508	0.000924	0.00101	6215;284;3;3;42;4;4;2;1;2641;173	7349;2025;198;2;53;9;4;5;10;5573;491	6180.297,229.656,3.000,2.580,37.607,3.638,3.456,1.829,0.833	7307.965,1637.512,198.000.1.720,47.457,8.186,3.456,4.572,8.327	56.579	119.393	6.788	19.266	0.12	0.161	0.0150667	0.0295807	0.973293	1.32e-67	1.98e-67
chrIX:414712-414682	chrIX;414821;414679	uORF	Scer	N	0	0.301594	0.985667	30	109	3	AGAGUAUGU	AUG	UGUCAUAGGCACGGUAAAGAGCACUGA	0.730828	MCHRHGKEH	UGA	ACAATGAGAT	YIR031C|chrIX;414821;414679|414712,AAG	YIR031C|chrIX;414821;414679|WT	16393;2904;6;14;5;8;9;3;8;8839;541	19746;2557;118;436;10;13;10;11;12;9893;107	14101.643,2596.249,5.476,11.720,5.000,5.971,6.760,2.332,6.151	16985.973,2286.022,107.685.365.009,10.000,9.703,7.512,8.551,9.227	192.856	215.852	21.191	4.191	0.11	0.019	0.0207092	0.0265437	0.358095	0.043212	0.0458733	9907;2971;170;11;10;6;15;9;7;7627;225	15391;6239;233;20;8;12;10;14;10;10757;226	9851.681,2402.493,170.000,9.460,8.954,5.457,12.960,8.229,5.829	15305.060,5045.154,233.000.17.200,7.163,10.915,8.640,12.801,8.327	163.397	230.453	8.828	8.868	0.054	0.038	0.0263497	0.0283369	0.104896	8.29e-13	9.72e-13
chrIX:414760-414754	chrIX;414821;414679	uORF	Scer	N	0.00166667	0.00225	0.004	6	61	75	UACGCAUGU	AUG	UAG	1	M	UAG	UCUUAAUUCU	YIR031C|chrIX;414821;414679|414760,AAG	YIR031C|chrIX;414821;414679|WT	17270;649;236;311;174;14;15;14;12;7831;1	19746;2557;118;436;10;13;10;11;12;9893;107	14856.059,580.222,215.370,260.362,174.000,10.449,11.267,10.883,9.227	16985.973,2286.022,107.685.365.009,10.000,9.703,7.512,8.551,9.227	170.862	215.852	0.039	4.191	0	0.019	0.0284513	0.0265437	-0.100128	1e-21	1.27e-21	16200;4485;107;53;8;7;9;14;13;6967;77	15391;6239;233;20;8;12;10;14;10;10757;226	16109.542,3626.785,107.000,45.579,7.163,6.367,7.776,12.801,10.825	15305.060,5045.154,233.000.17.200,7.163,10.915,8.640,12.801,8.327	149.258	230.453	3.021	8.868	0.02	0.038	0.0235376	0.0283369	0.26771	1.18e-31	1.55e-31
chrIX:414776-414725	chrIX;414821;414679	uORF	Scer	Y	0.735333	0.104547	0.0116667	51	45	46	AUAAAAUGG	AUG	GGGACAUUUACGCAUGUAGUCUUAAUUCUUCACUUUCUGUGCAGUUGA	0.653166	MGTFTHVVLILHFLCS	UGA	UAUCACUUAG	YIR031C|chrIX;414821;414679|414776,414725,AAG	YIR031C|chrIX;414821;414679|WT	5811;4259;77;97;4;8;1061;7;7;7817;1156	19746;2557;118;436;10;13;10;11;12;9893;107	4998.759,3807.652,70.269,81.206,4.000,5.971,796.974,5.442,5.382	16985.973,2286.022,107.685.365.009,10.000,9.703,7.512,8.551,9.227	170.557	215.852	45.281	4.191	0.265	0.019	0.10864	0.0265437	-2.03312	0	0	7162;3829;267;4;3;9;10;3;6;7339;362	15391;6239;233;20;8;12;10;14;10;10757;226	7122.009,3096.312,267.000,3.440,2.686,8.186,8.640,2.743,4.996	15305.060,5045.154,233.000.17.200,7.163,10.915,8.640,12.801,8.327	157.227	230.453	14.204	8.868	0.09	0.038	0.0348291	0.0283369	-0.297611	5.32e-22	6.61e-22
chrIX:414798-414783	chrIX;414821;414679	uORF	Scer	Y	0.0273333	0.194647	0.478	15	23	104	GUCAAUUGG	UUG	GUGAAGCAAUAA	0.772026	MVKQ	UAA	GUAUAAAAUG	YIR031C|chrIX;414821;414679|414798,414783,AAG	YIR031C|chrIX;414821;414679|WT	14446;3177;91;7;8;11;11;7;9;9429;292	19746;2557;118;436;10;13;10;11;12;9893;107	12426.788,2840.317,83.045,5.860,8.000,8.210,8.263,5.442,6.920	16985.973,2286.022,107.685.365.009,10.000,9.703,7.512,8.551,9.227	205.729	215.852	11.438	4.191	0.056	0.019	0.0244292	0.0265437	0.119761	3.14e-14	3.81e-14	15047;4172;164;7;120;299;8;9;11;9890;105	15391;6239;233;20;8;12;10;14;10;10757;226	14962.980,3373.679,164.000,6.020,107.450,271.963,6.912,8.229,9.160	15305.060,5045.154,233.000.17.200,7.163,10.915,8.640,12.801,8.327	211.878	230.453	4.12	8.868	0.019	0.038	0.0358034	0.0283369	-0.337418	1.05e-14	1.25e-14
chrIX:415657-415642	chrIX;415718;415617	uORF	Scer	N	0.0453333	0.233941	0.0116667	15	61	25	UCUUGAUGC	AUG	CUUAUCUUGUAG	0.714351	MLIL	UAG	GGCAAAAAAU	YIR032C|chrIX;415718;415617|415657,AAG	YIR032C|chrIX;415718;415617|WT	3739;5671;3;4;10;8;8;8;6;4246;0	1803;4194;0;5;0;1;1;2;1;1149;0	3216.376,5070.016,2.738,3.349,10.000,5.971,6.009,6.219,4.614	1550.983,3749.541,0.000.4.186,0.000,0.746,0.751,1.555,0.769	92.642	25.07	0	0	0	0	0.0532593	0.0575094	0.110763	1.62e-19	2.03e-19	2463;8294;310;6;4;4;5;2;5;5663;266	1280;3;0;2;1;0;2;4;1;1182;25	2449.247,6706.925,310.000,5.160,3.582,3.638,4.320,1.829,4.164	1272.853,2.426,0.000.1.720,0.895,0.000,1.728,3.657,0.833	121.321	25.323	10.437	0.981	0.086	0.039	0.0622423	0.0140154	-2.15088	0	0
chrIX:415705-415642	chrIX;415718;415617	uORF	Scer	N	0.0196667	0.206754	0.0116667	63	13	25	UAUUCAUGU	AUG	UGCAUUCGCAUAUAUAAGUCAGUAACUGUCAUCCAAUCGCUCUUGAUGCUUAUCUUGUAG	0.627103	MCIRIYKSVTVIQSLLMLIL	UAG	GGCAAAAAAU	YIR032C|chrIX;415718;415617|415705,AAG	YIR032C|chrIX;415718;415617|WT	2877;1834;0;1;254;6;8;7;3;2540;0	1803;4194;0;5;0;1;1;2;1;1149;0	2474.863,1639.642,0.000,0.837,254.000,4.478,6.009,5.442,2.307	1550.983,3749.541,0.000.4.186,0.000,0.746,0.751,1.555,0.769	55.42	25.07	0	0	0	0	0.0693595	0.0575094	-0.270298	2.87e-83	4.56e-83	3913;879;0;2;2;3;6;4;3;3024;0	1280;3;0;2;1;0;2;4;1;1182;25	3891.151,710.801,0.000,1.720,1.791,2.729,5.184,3.657,2.498	1272.853,2.426,0.000.1.720,0.895,0.000,1.728,3.657,0.833	64.785	25.323	0	0.981	0	0.039	0.0210713	0.0140154	-0.588267	7.27e-16	8.71e-16
chrIX:415718-415685	chrIX;415718;415617	uORF	Scer	N	0.021	0.189486	0.583333	33	0	68	ND-too-cl	AUG	CGGUCUAUUCAUGUGCAUUCGCAUAUAUAA	0.629526	MRSIHVHSHI	UAA	GUCAGUAACU	YIR032C|chrIX;415718;415617|415718,AAG	YIR032C|chrIX;415718;415617|WT	4882;10029;147;323;8;19;16;4;8;8073;0	1803;4194;0;5;0;1;1;2;1;1149;0	4199.611,8966.176,134.150,270.408,8.000,14.181,12.018,3.110,6.151	1550.983,3749.541,0.000.4.186,0.000,0.746,0.751,1.555,0.769	176.142	25.07	0	0	0	0	0.0657316	0.0575094	-0.192791	0.5243	0.53914	4497;11112;87;6;15;11;10;6;19;6443;448	1280;3;0;2;1;0;2;4;1;1182;25	4471.890,8985.694,87.000,5.160,13.431,10.005,8.640,5.486,15.821	1272.853,2.426,0.000.1.720,0.895,0.000,1.728,3.657,0.833	138.032	25.323	17.579	0.981	0.127	0.039	0.0547595	0.0140154	-1.96609	0	0
chrIX:41775-41811	chrIX;41770;41824	uORF	Scer	N	0.16	0.379306	0.242667	36	5	13	ND-too-cl	AUG	AUGAUCGUGACACAAAAGCAGAUAAAAAAAUAG	0.76192	MMIVTQKQIKK	UAG	CACAAUCAUC	YIL159W|chrIX;41770;41824|41775,AAG	YIL159W|chrIX;41770;41824|WT	1120;2055;4;2;0;97;2;4;6;1776;0	356;1447;0;1;0;2;3;1;0;893;94	963.450,1837.221,3.650,1.674,0.000,72.396,1.502,3.110,4.614	306.240,1293.654,0.000.0.837,0.000,1.493,2.253,0.777,0.000	38.75	19.484	0	3.682	0	0.189	0.0734112	0.0662261	-0.1486	2.22e-11	2.64e-11	1183;2431;1;24;2;5;3;2;0;2049;71	306;925;0;0;0;3;1;0;2;894;0	1176.394,1965.823,1.000,20.639,1.791,4.548,2.592,1.829,0.000	304.291,747.999,0.000.0.000,0.000,2.729,0.864,0.000,1.665	43.897	19.153	2.786	0	0.063	0	0.0526287	0.0574216	0.125745	0.000137184	0.000149
chrIX:41778-41811	chrIX;41770;41824	uORF	Scer	N	0.217333	0.395909	0.242667	33	8	13	UGAUGAUGA	AUG	AUCGUGACACAAAAGCAGAUAAAAAAAUAG	0.741482	MIVTQKQIKK	UAG	CACAAUCAUC	YIL159W|chrIX;41770;41824|41778,AAG	YIL159W|chrIX;41770;41824|WT	92;3023;174;2;1;3;4;1;4;1469;0	356;1447;0;1;0;2;3;1;0;893;94	79.141,2702.637,158.790,1.674,1.000,2.239,3.005,0.777,3.076	306.240,1293.654,0.000.0.837,0.000,1.493,2.253,0.777,0.000	32.052	19.484	0	3.682	0	0.189	0.0872698	0.0662261	-0.398083	4.85e-31	6.48e-31	104;2053;202;2;3;2;3;2;2;1521;92	306;925;0;0;0;3;1;0;2;894;0	103.419,1660.154,202.000,1.720,2.686,1.819,2.592,1.829,1.665	304.291,747.999,0.000.0.000,0.000,2.729,0.864,0.000,1.665	32.585	19.153	3.61	0	0.111	0	0.0898083	0.0574216	-0.645254	1.75e-44	2.44e-44
chrIX:421852-421831	chrIX;421859;421790	uORF	Scer	N	0.000333333	0.000391304	0.000666667	21	7	41	GUGCAAUGG	AUG	GAAGAAUAUUGUACCUAA	0.922213	MEEYCT	UAA	AAAAAAGGGU	YIR035C|chrIX;421859;421790|421852,AAG	YIR035C|chrIX;421859;421790|WT	13;8;3;2;10;6;1096;5574;4899;2989;4174	7;3599;528;33;2;5;5;0;2;1596;91	11.183,7.152,2.738,1.674,10.000,4.478,823.265,4333.129,3766.978	6.022,3217.596,481.845.27.627,2.000,3.732,3.756,0.000,1.538	65.216	34.823	163.497	3.564	2.507	0.102	0.927918	0.10264	-3.1764	0	0	9;12;0;2;30;335;1974;3454;7556;3172;4579	267;2712;143;36;2;1;4;1;3;1380;617	8.950,9.704,0.000,1.720,26.862,304.708,1705.582,3158.125,6291.903	265.509,2193.053,143.000.30.959,1.791,0.910,3.456,0.914,2.498	67.955	29.564	179.67	24.21	2.644	0.819	0.946337	0.0808828	-3.54845	0	0
chrIX:436005-oORF	chrIX;436095;435983	oORF	Scer	N	NA	NA	NA	NA	90	NA	AAAUAAUGC	AUG	NA	NA	NA	NA	NA	YIR042C|chrIX;436095;435983|436005,AAG	YIR042C|chrIX;436095;435983|WT	4724;2449;1;2;0;1;7;3;3;2292;0	5589;2541;3;6;3;8;6;16;11;5210;251	4063.696,2189.467,0.913,1.674,0.000,0.746,5.258,2.332,2.307	4807.789,2271.717,2.738.5.023,3.000,5.971,4.507,12.438,8.458	50.008	113.675	0	9.832	0	0.086	0.0341092	0.0348449	0.0307904	0.0120314	0.0129293	3213;1394;41;4;3;3;2;3;4;2591;46	4548;3764;5;5;5;7;2;9;8;6672;135	3195.059,1127.255,41.000,3.440,2.686,2.729,1.728,2.743,3.331	4522.605,3043.750,5.000.4.300,4.477,6.367,1.728,8.229,6.662	55.508	142.938	1.805	5.297	0.033	0.037	0.0295759	0.0369849	0.322512	1.27e-32	1.67e-32
chrIX:436053-oORF	chrIX;436095;435983	oORF	Scer	N	NA	NA	NA	NA	42	NA	AUAGCAUGG	AUG	NA	NA	NA	NA	NA	YIR042C|chrIX;436095;435983|436053,AAG	YIR042C|chrIX;436095;435983|WT	8136;2670;378;169;225;3;7;7;9;3102;0	5589;2541;3;6;3;8;6;16;11;5210;251	6998.778,2387.047,344.957,141.483,225.000,2.239,5.258,5.442,6.920	4807.789,2271.717,2.738.5.023,3.000,5.971,4.507,12.438,8.458	67.682	113.675	0	9.832	0	0.086	0.0519208	0.0348449	-0.575363	0.612	0.626	3971;3174;79;4;172;5;4;5;3;3025;122	4548;3764;5;5;5;7;2;9;8;6672;135	3948.827,2566.648,79.000,3.440,154.012,4.548,3.456,4.572,2.498	4522.605,3043.750,5.000.4.300,4.477,6.367,1.728,8.229,6.662	64.806	142.938	4.787	5.297	0.074	0.037	0.0494227	0.0369849	-0.418238	0.0115644	0.0122568
chrIX:436069-436060	chrIX;436095;435983	uORF	Scer	N	0.135333	0.119727	0.0743333	9	26	77	CAACAAUGA	AUG	AUAUAA	0.780189	MI	UAA	AAAUAGCAUG	YIR042C|chrIX;436095;435983|436069,AAG	YIR042C|chrIX;436095;435983|WT	8900;7297;3;199;2;22;11;8;15;7164;29	5589;2541;3;6;3;8;6;16;11;5210;251	7655.989,6523.700,2.738,166.598,2.000,16.420,8.263,6.219,11.534	4807.789,2271.717,2.738.5.023,3.000,5.971,4.507,12.438,8.458	156.309	113.675	1.136	9.832	0.007	0.086	0.0463794	0.0348449	-0.412536	3.46e-67	5.29e-67	10813;3085;36;5;7;13;10;10;10;7775;208	4548;3764;5;5;5;7;2;9;8;6672;135	10752.622,2494.678,36.000,4.300,6.268,11.824,8.640,9.143,8.327	4522.605,3043.750,5.000.4.300,4.477,6.367,1.728,8.229,6.662	166.568	142.938	8.161	5.297	0.049	0.037	0.0234263	0.0369849	0.658807	1.59e-141	2.87e-141
chrIX:55073-oORF	chrIX;55073;55021	oORF	Scer	N	NA	NA	NA	NA	0	NA	ND-too-cl	AUG	NA	NA	NA	NA	NA	YIL154C|chrIX;55073;55021|55073,AAG	YIL154C|chrIX;55073;55021|WT	19;10;4;1;5;288;1338;4585;3399;2911;6528	8;4;133;1922;3541;901;305;2;6;3065;2256	16.344,8.940,3.650,0.837,5.000,214.950,1005.044,3564.298,2613.586	6.882,3.576,121.374.1609.054,3541.000,672.464,229.102,1.555,4.614	63.514	66.874	255.703	88.368	4.026	1.321	0.911698	0.530421	-0.781418	0	0	6;14;18;8;56;24;1725;4279;5651;2755;7725	5;7;39;2598;4736;628;437;2;4;2907;3332	5.966,11.321,18.000,6.880,50.143,21.830,1490.440,3912.455,4705.604	4.972,5.661,39.000.2234.223,4240.689,571.213,377.578,1.829,3.331	59.022	62.278	303.112	130.74	5.136	2.099	0.943131	0.522753	-0.851328	0	0
chrIX:55171-55186	chrIX;55164;55197	uORF	Scer	N	0	0.00606667	0.00566667	15	7	11	CACAUAUGA	AUG	AACAAGCAUUAA	0.833593	MNKH	UAA	ACGAGCAAAG	YIL153W|chrIX;55164;55197|55171,AAG	YIL153W|chrIX;55164;55197|WT	0;0;0;0;0;0;1;160;178;59;0	0;0;0;0;21;137;189;1;0;71;0	0.000,0.000,0.000,0.000,0.000,0.000,0.751,124.381,136.869	0.000,0.000,0.000.0.000,21.000,102.250,141.968,0.777,0.000	1.287	1.549	0	0	0	0	0.946994	0.762174	-0.313234	9e-88	1.45e-87	0;0;0;0;0;0;1;0;355;66;7	2;0;0;1;27;51;117;0;2;63;0	0.000,0.000,0.000,0.000,0.000,0.000,0.864,0.000,295.610	1.989,0.000,0.000.0.860,24.176,46.388,101.091,0.000,1.665	1.414	1.35	0.275	0	0.194	0	0.999466	0.754722	-0.405212	8.63e-73	1.32e-72
chrIX:68106-68100	chrIX;68209;68067	uORF	Scer	N	0.018	0.024	0.0423333	6	103	33	AAGAAAUUU	AUU	UAA	1	M	UAA	GGCGAAAGAA	YIL149C|chrIX;68209;68067|68106,68100,AAG	YIL149C|chrIX;68209;68067|WT	4;2;1145;2675;818;4;6;2;6;1836;1093	2;2;1162;3182;458;196;1;3;3;1737;0	3.441,1.788,1044.909,2239.448,818.000,2.985,4.507,1.555,4.614	1.720,1.788,1060.423.2663.897,458.000,146.285,0.751,2.332,2.307	40.059	37.899	42.813	0	1.069	0	0.386531	0.383099	-0.0128677	0.013	0.0139	3;63;1402;3775;807;4;2;4;0;2444;418	3;2;296;3123;629;1;4;2;0;1675;404	2.983,50.945,1402.000,3246.418,722.601,3.638,1.728,3.657,0.000	2.983,1.617,296.000.2685.712,563.217,0.910,3.456,1.829,0.000	52.359	35.884	16.401	15.852	0.313	0.442	0.363954	0.395871	0.121274	3.49e-46	4.88e-46
chrIX:97333-oORF	chrIX;97317;97394	oORF	Scer	N	NA	NA	NA	NA	16	NA	GGAAUAUGU	AUG	NA	NA	NA	NA	NA	YIL134W|chrIX;97317;97394|97333,AAG	YIL134W|chrIX;97317;97394|WT	22;15;8;15;391;9686;9281;2604;1849;5710;2456	9306;3245;147;199;7;16;16;9;9;7470;190	18.925,13.410,7.301,12.558,391.000,7229.177,6971.459,2024.304,1421.748	8005.240,2901.111,134.150.166.598,7.000,11.942,12.018,6.996,6.920	124.585	162.986	96.202	7.442	0.772	0.046	0.794981	0.0377046	-4.39811	0	0	19;14;3;5;1965;5549;9454;4683;175;5591;3487	14540;5787;61;51;127;11;12;7;14;6967;700	18.894,11.321,3.000,4.300,1759.492,5047.235,8168.476,4281.848,145.723	14458.811,4679.645,61.000.43.859,113.718,10.005,10.368,6.400,11.658	119.779	149.258	136.822	27.466	1.142	0.184	0.79855	0.0298204	-4.74301	0	0
chrV:101901-101928	chrV;101852;101942	uORF	Scer	Y	1	0.481259	0.258	27	49	14	GGAACUUGA	UUG	AAUAAACCAGAUUUCAUACUAUAA	0.823976	MNKPDFIL	UAA	AAACUAUAUU	YEL026W|chrV;101852;101942|101901,101928,AAG	YEL026W|chrV;101852;101942|WT	2;3;0;1;0;4;1;798;1062;509;0	2;1;0;0;1;431;1;2298;503;405;206	1.720,2.682,0.000,0.837,0.000,2.985,0.751,620.351,816.601	1.720,0.894,0.000.0.000,1.000,321.678,0.751,1786.425,386.771	11.106	8.837	0	8.069	0	0.913	0.948333	0.882643	-0.103564	7.98e-129	1.4e-128	2;1;0;1;3;1;683;1167;673;747;47	2;1;0;0;107;0;1220;1;1;556;387	1.989,0.809,0.000,0.860,2.686,0.910,590.128,1067.033,560.409	1.989,0.809,0.000.0.000,95.809,0.000,1054.108,0.914,0.833	16.003	11.911	1.844	15.185	0.115	1.275	0.92133	0.814989	-0.176937	4.06e-280	8.85e-280
chrV:111365-oORF	chrV;111306;111420	oORF	Scer	Y	NA	NA	NA	NA	59	NA	AUAAACUGA	CUG	NA	NA	NA	NA	NA	YEL022W|chrV;111306;111420|111365,111428,AAG	YEL022W|chrV;111306;111420|WT	5;12;7;258;705;4985;9893;442;327;2953;2921	5;2;4;3;522;1193;2228;472;301;2334;1404	4.301,10.728,6.388,215.992,705.000,3720.571,7431.165,343.603,251.439	4.301,1.788,3.650.2.512,522.000,890.399,1673.571,366.924,231.447	64.431	50.925	114.416	54.995	1.776	1.08	0.77635	0.776426	0.000139654	0.0023752	0.0025866	12;10;6;195;531;3701;4506;1468;9;3014;2774	6;4;3;2;4;1710;6000;696;1479;2616;2250	11.933,8.086,6.000,167.696,475.466,3366.339,3893.289,1342.249,7.494	5.966,3.235,3.000.1.720,3.582,1555.374,5184.140,636.380,1231.568	64.57	56.044	108.846	88.285	1.686	1.575	0.77944	0.844589	0.11581	7.09e-245	1.48e-244
chrV:120354-120348	chrV;120367;120299	uORF	Scer	N	0.001	0.0015	0.000333333	6	13	49	CUUUUAUGU	AUG	UGA	1	M	UGA	UAAGAAGAAU	YEL020C|chrV;120367;120299|120354,120348,AAG	YEL020C|chrV;120367;120299|WT	6;4;3;4;5;1638;2458;3489;792;2907;1818	4;881;3097;256;3;285;7;7;2;3155;711	5.161,3.576,2.738,3.349,5.000,1222.527,1846.336,2712.287,608.991	3.441,787.636,2826.274.214.317,3.000,212.711,5.258,5.442,1.538	63.427	68.838	71.211	27.85	1.123	0.405	0.847019	0.247201	-1.77671	0	0	3;6;1;3;3;128;4418;2749;1473;2763;2651	4;1416;4147;479;2;3;4;3;2;2071;779	2.983,4.852,1.000,2.580,2.686,116.426,3817.255,2513.517,1226.571	3.978,1145.045,4147.000.411.930,1.791,2.729,3.456,2.743,1.665	59.193	44.368	104.019	30.566	1.757	0.689	0.891794	0.216252	-2.044	0	0
chrV:13586-13610	chrV;13585;13719	uORF	Scer	N	0.0156667	0.040875	0.117667	24	1	109	ND-too-cl	AUG	CACAAAACAGUAUGGAUAUAA	0.776951	MHKTVWI	UAA	UACACCUUAC	YEL072W|chrV;13585;13719|13586,AAG	YEL072W|chrV;13585;13719|WT	8310;4;0;5;5;4;4;1;3;2784;349	10479;1471;1;3;296;3;9;7;7;6631;431	7148.457,3.576,0.000,4.186,5.000,2.985,3.005,0.777,2.307	9014.282,1315.111,0.913.2.512,296.000,2.239,6.760,5.442,5.382	60.743	144.68	13.67	16.882	0.225	0.117	0.0105215	0.0338911	1.68757	9.32e-65	1.41e-64	8560;1106;0;71;3;6;3;6;5;2654;304	10416;1743;52;5;2;4;5;5;6;6217;172	8512.203,894.364,0.000,61.058,2.686,5.457,2.592,5.486,4.164	10357.839,1409.473,52.000.4.300,1.791,3.638,4.320,4.572,4.996	56.858	133.19	11.928	6.749	0.21	0.051	0.0183385	0.0181661	-0.0136229	0.005703	0.00606639
chrV:13600-13636	chrV;13585;13719	uORF	Scer	N	0.032	0.0603611	0.027	36	15	83	ACAGUAUGG	AUG	GAUAUAAUACACCUUACUCUUGGUCGUGAUUGA	0.673898	MDIIHLTLGRD	UGA	AAACGUAAGG	YEL072W|chrV;13585;13719|13600,AAG	YEL072W|chrV;13585;13719|WT	2578;2046;0;1;102;2;2;4;2;2437;1	10479;1471;1;3;296;3;9;7;7;6631;431	2217.656,1829.175,0.000,0.837,102.000,1.493,1.502,3.110,1.538	9014.282,1315.111,0.913.2.512,296.000,2.239,6.760,5.442,5.382	53.172	144.68	0.039	16.882	0.001	0.117	0.0538549	0.0338911	-0.668169	1.22e-181	2.33e-181	2705;1979;405;2;2;2;3;3;3;1695;102	10416;1743;52;5;2;4;5;5;6;6217;172	2689.896,1600.314,405.000,1.720,1.791,1.819,2.592,2.743,2.498	10357.839,1409.473,52.000.4.300,1.791,3.638,4.320,4.572,4.996	36.313	133.19	4.002	6.749	0.11	0.051	0.0517726	0.0181661	-1.51094	1.42e-215	2.86e-215
chrV:13696-oORF	chrV;13585;13719	oORF	Scer	Y	NA	NA	NA	NA	111	NA	CUAUCAUGC	AUG	NA	NA	NA	NA	NA	YEL072W|chrV;13585;13719|13696,13720,AAG	YEL072W|chrV;13585;13719|WT	395;922;0;1;1;0;1;1;3;1685;0	10479;1471;1;3;296;3;9;7;7;6631;431	339.788,824.291,0.000,0.837,1.000,0.000,0.751,0.777,2.307	9014.282,1315.111,0.913.2.512,296.000,2.239,6.760,5.442,5.382	36.765	144.68	0	16.882	0	0.117	0.0613955	0.0338911	-0.857225	5.44e-200	1.07e-199	684;2111;1;0;0;1;4;3;1;850;28	10416;1743;52;5;2;4;5;5;6;6217;172	680.181,1707.056,1.000,0.000,0.000,0.910,3.456,2.743,0.833	10357.839,1409.473,52.000.4.300,1.791,3.638,4.320,4.572,4.996	18.21	133.19	1.099	6.749	0.06	0.051	0.0565575	0.0181661	-1.63847	0	0
chrV:144294-oORF	chrV;144269;144326	oORF	Scer	Y	NA	NA	NA	NA	25	NA	GUUUGAUGA	AUG	NA	NA	NA	NA	NA	YEL006W|chrV;144269;144326|144294,144327,AAG	YEL006W|chrV;144269;144326|WT	9;7;4;0;36;45;2488;1574;2186;1832;1435	1;3;3;194;2591;1849;293;3;8;1728;1797	7.742,6.258,3.650,0.000,36.000,33.586,1868.871,1223.600,1680.876	0.860,2.682,2.738.162.412,2591.000,1380.007,220.088,2.332,6.151	39.972	37.703	56.209	70.389	1.406	1.867	0.898138	0.610107	-0.557873	0	0	7;11;3;3;79;91;2136;2064;3119;1695;1118	3;5;1;494;3408;1652;568;2;8;1836;1088	6.961,8.895,3.000,2.580,70.738,82.771,1845.554,1887.195,2597.200	2.983,4.043,1.000.424.829,3051.577,1502.619,490.765,1.829,6.662	36.313	39.334	43.868	42.691	1.208	1.085	0.922481	0.604309	-0.610232	0	0
chrV:146795-146756	chrV;146795;146755	uORF	Scer	N	0.00133333	0.0213659	0.242667	39	0	1	ND-too-cl	AUG	CGUAACCAAACCAUAAGAAAGGCAGAGAGUGCCUAG	0.660209	MRNQTIRKAESA	UAG	CATGAGATCT	YEL005C|chrV;146795;146755|146795,AAG	YEL005C|chrV;146795;146755|WT	3;0;0;115;459;582;25;34;2;450;947	547;481;0;2;1;1;2;1;2;441;230	2.581,0.000,0.000,96.275,459.000,434.378,18.779,26.431,1.538	470.542,430.026,0.000.1.674,1.000,0.746,1.502,0.777,1.538	9.818	9.622	37.094	9.009	3.778	0.936	0.616198	0.0482549	-3.67465	0	0	0;0;5;308;826;247;0;1;0;514;1037	800;947;20;0;0;1;1;2;0;585;155	0.000,0.000,5.000,264.873,739.613,224.665,0.000,0.914,0.000	795.533,765.789,20.000.0.000,0.000,0.910,0.864,1.829,0.000	11.012	12.533	40.69	6.082	3.695	0.485	0.539593	0.0437533	-3.62441	0	0
chrV:184476-184521	chrV;184459;184540	uORF	Scer	N	0.00133333	0.0157778	0.100333	45	17	19	AACGCAUGG	AUG	GCUAAGGGAAGUGGAAGAAUGCAGGUUACAAAAAACGGAUAA	0.740994	MAKGSGRMQVTKNG	UAA	GAACAAACUU	YER015W|chrV;184459;184540|184476,AAG	YER015W|chrV;184459;184540|WT	13901;7422;148;62;261;26;17;14;15;9762;2216	9661;4964;50;7;5;10;11;9;14;5684;1283	11957.966,6635.453,135.062,51.905,261.000,19.405,12.770,10.883,11.534	8310.619,4437.940,45.629.5.860,5.000,7.464,8.263,6.996,10.765	212.994	124.018	86.801	50.255	0.408	0.405	0.0446237	0.0355296	-0.32879	2.54e-05	2.85e-05	10372;7342;166;10;154;23;24;14;15;9000;1187	5560;4250;104;5;9;13;10;4;13;6063;940	10314.085,5937.092,166.000,8.600,137.894,20.920,20.737,12.801,12.491	5528.954,3436.753,104.000.4.300,8.059,11.824,8.640,3.657,10.825	192.812	129.891	46.575	36.884	0.242	0.284	0.0410184	0.0385896	-0.0880577	0.135	0.14
chrV:184497-184521	chrV;184459;184540	uORF	Scer	N	0.001	0.0280417	0.100333	24	38	19	GAAGAAUGC	AUG	CAGGUUACAAAAAACGGAUAA	0.753397	MQVTKNG	UAA	GAACAAACUU	YER015W|chrV;184459;184540|184497,AAG	YER015W|chrV;184459;184540|WT	14;9;3469;7099;1480;141;19;6;13;5837;5425	9661;4964;50;7;5;10;11;9;14;5684;1283	12.043,8.046,3165.755,5943.120,1480.000,105.236,14.272,4.664,9.996	8310.619,4437.940,45.629.5.860,5.000,7.464,8.263,6.996,10.765	127.356	124.018	212.499	50.255	1.669	0.405	0.373449	0.0355296	-3.39382	0	0	15;19;4360;7690;770;11;11;9;9;6347;4017	5560;4250;104;5;9;13;10;4;13;6063;940	14.916,15.364,4360.000,6613.232,689.470,10.005,9.504,8.229,7.494	5528.954,3436.753,104.000.4.300,8.059,11.824,8.640,3.657,10.825	135.975	129.891	157.618	36.884	1.159	0.284	0.3383	0.0385896	-3.13202	0	0
chrV:211954-211933	chrV;211968;211876	uORF	Scer	N	0.00866667	0.00443478	0.004	21	14	57	UUGCCAUGA	AUG	AGUCGGUGUGCUUCAUAG	0.594444	MSRCAS	UAG	UAUUUCCUUU	YER028C|chrV;211968;211876|211954,AAG	YER028C|chrV;211968;211876|WT	11116;6735;12;14;10;17;18;13;16;11379;910	15203;1287;36;7;1;10;15;9;6;5549;389	9562.244,6021.258,10.951,11.720,10.000,12.688,13.521,10.106,12.303	13077.977,1150.610,32.853.5.860,1.000,7.464,11.267,6.996,4.614	248.275	121.072	35.645	15.237	0.144	0.126	0.0381275	0.0165753	-1.2018	0	0	9291;11022;70;15;76;911;14;17;18;10743;267	8653;1125;350;4;3;9;9;7;11;6153;256	9239.121,8912.916,70.000,12.900,68.052,828.623,12.096,15.544,14.989	8604.683,909.729,350.000.3.440,2.686,8.186,7.776,6.400,9.160	230.153	131.819	10.476	10.045	0.046	0.076	0.0727867	0.0251962	-1.53047	0	0
chrV:215025-215040	chrV;214978;215062	uORF	Scer	N	0.048	0.0124	0.00266667	15	47	22	AUUAGAUUG	AUU	GCGCUGGGAUAG	0.494666	MALG	UAG	AUCUGAAGCU	YER032W|chrV;214978;215062|215025,215040,AAG	YER032W|chrV;214978;215062|WT	4;3;149;4102;1859;25;11;1;5;3372;1713	7;70;3475;1434;602;7;9;5;5;2220;1696	3.441,2.682,135.975,3434.100,1859.000,18.659,8.263,0.777,3.845	6.022,62.582,3171.231.1200.512,602.000,5.224,6.760,3.887,3.845	73.573	48.438	67.099	66.433	0.912	1.372	0.442921	0.316245	-0.486005	0	0	2;14;254;2015;2048;38;5;5;6;3419;3151	14;607;2905;2390;7;1;5;4;2;2542;1511	1.989,11.321,254.000,1732.856,1833.812,34.564,4.320,4.572,4.996	13.922,490.849,2905.000.2055.348,6.268,0.910,4.320,3.657,1.665	73.247	54.459	123.638	59.288	1.688	1.089	0.454113	0.277941	-0.708271	0	0
chrV:228413-228440	chrV;228383;228450	uORF	Scer	N	0.276	0.313296	0.002	27	30	11	UAUAAAUGA	AUG	AAUAUAAAUGUAUAUUUUGCUUGA	0.874266	MNINVYFA	UGA	GCAAATGAAG	YER038W-A|chrV;228383;228450|228413,AAG	YER038W-A|chrV;228383;228450|WT	280;349;23;0;0;89;0;0;1;625;0	1061;993;6;3;44;2;2;4;1;824;457	240.863,312.015,20.989,0.000,0.000,66.425,0.000,0.000,0.769	912.697,887.767,5.476.2.512,44.000,1.493,1.502,3.110,0.769	13.637	17.979	0	17.901	0	0.996	0.124061	0.0593038	-1.06485	3.14e-10	3.68e-10	2;860;67;0;0;0;1;0;1;606;262	337;1506;0;2;2;4;2;3;2;871;233	1.989,695.437,67.000,0.000,0.000,0.000,0.864,0.000,0.833	335.118,1217.824,0.000.1.720,1.791,3.638,1.728,2.743,1.665	12.983	18.66	10.28	9.142	0.792	0.49	0.0882316	0.0642559	-0.457468	7.6e-27	9.7e-27
chrV:232400-232409	chrV;232395;232460	uORF	Scer	Y	0.006	0.002	0.003	9	5	51	D-too-clo	AUG	AAAUGA	1	MK	UGA	CAGUUCUAUU	YER041W|chrV;232395;232460|232400,232409,AAG	YER041W|chrV;232395;232460|WT	1911;3987;42;69;7;9;6;3;3;2331;596	1994;3653;0;3;48;9;8;4;7;2510;1027	1643.887,3564.478,38.329,57.765,7.000,6.717,4.507,2.332,2.307	1715.286,3265.873,0.000.2.512,48.000,6.717,6.009,3.110,5.382	50.859	54.765	23.345	40.228	0.459	0.735	0.0632494	0.0617163	-0.0354002	0.00170924	0.00186739	2068;3773;32;5;4;6;9;1;7;2865;804	616;4351;140;4;4;5;5;5;7;2767;1083	2056.453,3051.028,32.000,4.300,3.582,5.457,7.776,0.914,5.829	612.560,3518.427,140.000.3.440,3.582,4.548,4.320,4.572,5.829	61.378	59.279	31.547	42.495	0.514	0.717	0.0510778	0.0724986	0.505255	2.07e-112	3.48e-112
chrV:232406-oORF	chrV;232395;232460	oORF	Scer	N	NA	NA	NA	NA	11	NA	AUGAAAUGA	AUG	NA	NA	NA	NA	NA	YER041W|chrV;232395;232460|232406,AAG	YER041W|chrV;232395;232460|WT	1;1;2;8;480;1091;635;239;0;1045;2135	1994;3653;0;3;48;9;8;4;7;2510;1027	0.860,0.894,1.825,6.697,480.000,814.271,476.983,185.794,0.000	1715.286,3265.873,0.000.2.512,48.000,6.717,6.009,3.110,5.382	22.801	54.765	83.628	40.228	3.668	0.735	0.715783	0.0617163	-3.5358	0	0	1;1;2;28;395;774;246;351;252;753;2543	616;4351;140;4;4;5;5;5;7;2767;1083	0.994,0.809,2.000,24.079,353.689,704.012,212.550,320.933,209.841	612.560,3518.427,140.000.3.440,3.582,4.548,4.320,4.572,5.829	16.132	59.279	99.782	42.495	6.185	0.717	0.757999	0.0724986	-3.38617	0	0
chrV:254419-254401	chrV;254454;254387	uORF	Scer	N	0.302	0.134	0.0293333	18	35	14	GAUGAAUGC	AUG	CCACCACAGGCAUAA	0.817973	MPPQA	UAA	AAAUUCAAAA	YER050C|chrV;254454;254387|254419,AAG	YER050C|chrV;254454;254387|WT	13;38;5;5;56;4;589;513;12035;3936;8579	14;11;7;10;11;557;6085;4048;7852;4578;7472	11.183,33.973,4.563,4.186,56.000,2.985,442.430,398.797,9254.047	12.043,9.834,6.388.8.372,11.000,415.719,4570.771,3146.844,6037.622	85.878	99.886	336.041	292.68	3.913	2.93	0.980844	0.910033	-0.108106	0	0	14;10;7;37;10;6;14;615;14227;3218;5768	14;13;5;4;8;433;2475;5657;9449;4194;6958	13.922,8.086,7.000,31.819,8.954,5.457,12.096,562.318,11846.864	13.922,10.512,5.000.3.440,7.163,393.846,2138.458,5172.413,7868.210	68.941	89.85	226.323	273.016	3.283	3.039	0.9923	0.944968	-0.0705106	0	0
chrV:271161-oORF	chrV;271169;271126	oORF	Scer	Y	NA	NA	NA	NA	8	NA	AGAAAAUUU	AUU	NA	NA	NA	NA	NA	YER057C|chrV;271169;271126|271161,271126,AAG	YER057C|chrV;271169;271126|WT	2;1;1;1;0;32;669;104;6;141;99	0;0;0;0;0;235;196;13;0;107;10	1.720,0.894,0.913,0.837,0.000,23.883,502.522,80.848,4.614	0.000,0.000,0.000.0.000,0.000,175.393,147.226,10.106,0.000	3.076	2.335	3.878	0.392	1.261	0.168	0.829507	0.770124	-0.107164	1.35e-38	1.85e-38	0;1;0;0;0;66;461;16;2;126;184	0;1;0;0;0;70;43;155;10;119;169	0.000,0.809,0.000,0.000,0.000,60.032,398.315,14.629,1.665	0.000,0.809,0.000.0.000,0.000,63.670,37.153,141.722,8.327	2.699	2.549	7.22	6.631	2.675	2.601	0.825845	0.858674	0.0562391	5.36e-16	6.43e-16
chrV:281678-oORF	chrV;281648;281709	oORF	Scer	N	NA	NA	NA	NA	30	NA	CUAGAAUUG	AUU	NA	NA	NA	NA	NA	YER063W|chrV;281648;281709|281678,281709,AAG	YER063W|chrV;281648;281709|WT	14;10;7;29;268;3604;5488;2101;271;4019;8098	5;7;5;5;130;495;3765;2683;3421;3239;5459	12.043,8.940,6.388,24.278,268.000,2689.857,4122.332,1633.280,208.379	4.301,6.258,4.563.4.186,130.000,369.445,2828.094,2085.717,2630.502	87.689	70.671	317.201	213.83	3.617	3.026	0.797697	0.88933	0.156876	0	0	15;15;5;4;262;3767;7153;1982;497;3837;6851	12;5;2;30;147;342;4243;3492;2167;3136;4658	14.916,12.130,5.000,3.440,234.599,3426.371,6180.359,1812.219,413.853	11.933,4.043,2.000.25.799,131.626,311.075,3666.051,3192.870,1804.467	82.202	67.184	268.818	182.77	3.27	2.72	0.813573	0.891164	0.131419	0	0
chrV:291999-292023	chrV;291989;292065	uORF	Scer	N	0.00333333	0.00266667	0.00833333	24	10	42	CUGCAUUGU	UUG	UAUUCUAAUAAUUGCCCAUAG	0.930757	MYSNNCP	UAG	AACAUAUAAA	YER067W|chrV;291989;292065|291999,292023,AAG	YER067W|chrV;291989;292065|WT	7;7;9;6;5;495;5045;5634;1407;4237;3539	25;28;92;30;105;5035;14382;10396;2231;8087;9794	6.022,6.258,8.213,5.023,5.000,369.445,3789.571,4379.772,1081.882	21.506,25.033,83.958.25.115,105.000,3757.888,10803.094,8081.667,1715.478	92.446	176.448	138.623	383.633	1.5	2.174	0.869724	0.838489	-0.0527659	7.03e-218	1.42e-217	22;17;4;7;14;2318;7659;4318;3822;3636;5910	30;31;99;93;127;6177;10087;3826;2994;8077;10353	21.877,13.747,4.000,6.020,12.536,2108.396,6617.555,3948.114,3182.590	29.832,25.068,99.000.79.978,113.718,5618.448,8715.403,3498.259,2493.112	77.896	173.038	231.895	406.229	2.977	2.348	0.874327	0.83003	-0.0750099	3.84e-301	8.58e-301
chrV:292604-292586	chrV;292677;292563	uORF	Scer	N	0.165	0.0964	0.000666667	18	73	23	UACUUAUGA	AUG	AAUUUGGGAGGUUAG	0.868629	MNLGG	UAG	GAUUCAGUAC	YER067C-A|chrV;292677;292563|292604,AAG	YER067C-A|chrV;292677;292563|WT	38;2283;1089;450;0;3;8;4;3;2442;304	2099;1104;1;0;0;5;1;7;0;1520;0	32.688,2041.059,993.804,376.730,0.000,2.239,6.009,3.110,2.307	1805.609,987.004,0.913.0.000,0.000,3.732,0.751,5.442,0.000	53.281	33.164	11.908	0	0.223	0	0.162226	0.0356107	-2.18762	0	0	21;2091;1983;327;3;2;3;1;4;2264;238	3988;433;0;3;1;3;4;2;2;1744;0	20.883,1690.883,1983.000,281.213,2.686,1.819,2.592,0.914,3.331	3965.732,350.144,0.000.2.580,0.895,2.729,3.456,1.829,1.665	48.503	37.363	9.339	0	0.193	0	0.178218	0.0156	-3.51403	0	0
chrV:31250-oORF	chrV;31287;31239	oORF	Scer	N	NA	NA	NA	NA	37	NA	UAUACAUGU	AUG	NA	NA	NA	NA	NA	YEL064C|chrV;31287;31239|31250,AAG	YEL064C|chrV;31287;31239|WT	2;0;0;1;0;1;101;285;289;423;1042	2;2;699;665;49;94;49;1;1;459;763	1.720,0.000,0.000,0.837,0.000,0.746,75.867,221.554,222.220	1.720,1.788,637.896.556.723,49.000,70.157,36.807,0.777,0.769	9.229	10.015	40.815	29.887	4.422	2.984	0.92339	0.356737	-1.37208	9.74e-242	2.03e-241	2;0;0;17;1;2;367;1046;770;439;1233	1;1;632;467;14;1;3;1;0;409;663	1.989,0.000,0.000,14.620,0.895,1.819,317.097,956.398,641.181	0.994,0.809,632.000.401.610,12.536,0.910,2.592,0.914,0.000	9.405	8.762	48.38	26.015	5.144	2.969	0.932296	0.298781	-1.6417	0	0
chrV:318569-318614	chrV;318550;318645	uORF	Scer	N	0.0216667	0.298111	0.922333	45	19	31	UGUGAAUGU	AUG	UGUGCGUGUUGCAUAAUUGCAUUUGGCCUUUCCGAGAAAUAA	0.680671	MCACCIIAFGLSEK	UAA	GUCAUUCUUU	YER078W-A|chrV;318550;318645|318569,AAG	YER078W-A|chrV;318550;318645|WT	25;13;2964;19624;4191;28;19;11;18;9531;4316	49;11787;1395;67;4;15;13;9;9;5909;3410	21.506,11.622,2704.900,16428.761,4191.000,20.898,14.272,8.551,13.841	42.151,10537.872,1273.055.56.091,4.000,11.195,9.765,6.996,6.920	207.954	128.927	169.059	133.571	0.813	1.036	0.402621	0.0980727	-2.0375	0	0	15;595;5466;13575;2328;1118;26;13;16;9978;5152	301;12625;1784;3;10;13;9;8;11;5638;1570	14.916,481.145,5466.000,11674.204,2084.528,1016.906,22.465,11.886,13.323	299.319,10209.178,1784.000.2.580,8.954,11.824,7.776,7.315,9.160	213.764	120.786	202.153	61.603	0.946	0.51	0.369816	0.0968305	-1.93327	0	0
chrV:318884-318896	chrV;318840;318919	uORF	Scer	N	0.001	0.463833	0.807667	12	44	23	ACAAACUGC	CUG	CUGAGAUAA	0.736806	MLR	UAA	GAAAAGGAAG	YER079W|chrV;318840;318919|318884,318896,AAG	YER079W|chrV;318840;318919|WT	6;2;0;1;0;3;0;114;644;215;0	3;1;3;3;5;4;673;183;5352;2964;4618	5.161,1.788,0.000,0.837,0.000,2.239,0.000,88.622,495.190	2.581,0.894,2.738.2.512,5.000,2.985,505.527,142.261,4115.302	4.691	64.671	0	180.888	0	2.797	0.968046	0.976365	0.0123449	0.52478	0.539398	0;0;1;1;0;2;55;1;3488;249;538	3;3;0;1;2;2;307;3089;3716;1574;2240	0.000,0.000,1.000,0.860,0.000,1.819,47.521,0.914,2904.468	2.983,2.426,0.000.0.860,1.791,1.819,265.255,2824.392,3094.324	5.334	33.721	21.11	87.893	3.958	2.606	0.996478	0.959354	-0.0547746	1.23e-295	2.75e-295
chrV:337918-337930	chrV;337881;337948	uORF	Scer	Y	0.111333	0.00608333	0.000333333	12	37	18	UAGCACUGA	CUG	AUAUUCUGA	0.746529	MIF	UGA	UUGGAAAAAA	YER090W|chrV;337881;337948|337918,337930,AAG	YER090W|chrV;337881;337948|WT	6;4;3;44;39;2045;4571;1904;341;3046;2130	6;5;4;4;172;2693;5950;2581;238;2951;3368	5.161,3.576,2.738,36.836,39.000,1526.292,3433.524,1480.136,262.204	5.161,4.470,3.650.3.349,172.000,2009.929,4469.365,2006.424,183.005	66.46	64.387	83.433	131.925	1.255	2.049	0.817862	0.81365	-0.00744897	0.024266	0.0258768	7;170;1;5;421;1566;4497;2242;1552;2978;2999	10;11;1;75;463;2238;4614;1852;812;3303;2672	6.961,137.470,1.000,4.300,376.970,1424.395,3885.513,2049.947,1292.355	9.944,8.895,1.000.64.498,414.578,2035.630,3986.604,1693.355,676.155	63.799	70.762	117.674	104.843	1.844	1.482	0.83753	0.820179	-0.0302024	5.3e-50	7.51e-50
chrV:342222-342207	chrV;342237;342167	uORF	Scer	Y	1	0.999941	1	15	15	40	GAGCAUUGA	UUG	ACAACACUCUAA	0.639287	MTTL	UAA	GAAACAAAAU	YER091C|chrV;342237;342167|342222,342207,AAG	YER091C|chrV;342237;342167|WT	6;2;0;3;0;2;3;161;3950;1590;1988	2;1;1;0;2;0;2;628;1626;888;175	5.161,1.788,0.000,2.512,0.000,1.493,2.253,125.159,3037.265	1.720,0.894,0.913.0.000,2.000,0.000,1.502,488.196,1250.277	34.692	19.375	77.87	6.855	2.245	0.354	0.992266	0.96614	-0.0384944	6.63e-44	9.36e-44	6;7;1;3;44;1;6;1393;4163;1240;400	2;2;0;0;0;2;2;1738;1885;857;297	5.966,5.661,1.000,2.580,39.398,0.910,5.184,1273.674,3466.542	1.989,1.617,0.000.0.000,0.000,1.819,1.728,1589.120,1569.645	26.565	18.36	15.695	11.654	0.591	0.635	0.973934	0.962652	-0.0168095	3.31e-62	4.91e-62
chrV:359535-359559	chrV;359483;359561	uORF	Scer	Y	0.001	0.040875	0.126	24	52	2	GCAAAUUGC	UUG	CAAACAAAGUACGUACAAUAG	0.831588	MQTKYVQ	UAG	TAATGAGATC	YER100W|chrV;359483;359561|359535,359559,AAG	YER100W|chrV;359483;359561|WT	14;8;8;6;8;10;12;18;11505;3753;2546	15;14;4;6;10;13;552;601;19794;5533;2110	12.043,7.152,7.301,5.023,8.000,7.464,9.014,13.993,8846.515	12.903,12.516,3.650.5.023,10.000,9.703,414.637,467.207,15220.159	81.886	120.723	99.727	82.649	1.218	0.685	0.995567	0.990019	-0.00806103	9.16e-11	1.08e-10	14;8;5;2;7;11;9;785;16026;4273;1927	15;10;5;12;10;12;19;1662;19850;5827;3416	13.922,6.469,5.000,1.720,6.268,10.005,7.776,717.756,13344.896	14.916,8.086,5.000.10.320,8.954,10.915,16.416,1519.631,16529.152	91.543	124.835	75.611	134.036	0.826	1.074	0.993969	0.99155	-0.00351552	2.8e-07	3.13e-07
chrV:39646-39631	chrV;39651;39537	uORF	Scer	N	0.676667	0.599706	0.484333	15	5	94	ND-too-cl	AUG	GCCAGAAAGUAA	0.80764	MARK	UAA	CGUUGAGUAU	YEL061C|chrV;39651;39537|39646,AAG	YEL061C|chrV;39651;39537|WT	3;2;1;3;2;3184;3571;1042;4;841;1311	5;1;6;200;616;2033;1881;248;0;1900;1123	2.581,1.788,0.913,2.512,2.000,2376.389,2682.370,810.032,3.076	4.301,0.894,5.476.167.435,616.000,1517.336,1412.920,192.791,0.000	18.35	41.456	51.352	43.988	2.798	1.061	0.789749	0.722472	-0.128453	6.32e-134	1.12e-133	2;0;1;1;12;1124;3;95;2;807;790	4;3;4;1;1487;1262;838;2;1345;2594;995	1.989,0.000,1.000,0.860,10.745,1022.363,2.592,86.862,1.665	3.978,2.426,4.000.0.860,1331.483,1147.884,724.052,1.829,1119.985	17.289	55.573	30.998	39.042	1.793	0.703	0.720426	0.754358	0.066399	7.43e-05	8.1e-05
chrV:432430-432490	chrV;432425;432494	uORF	Scer	N	1	0.973067	0.986667	60	5	4	D-too-clo	GUG	AACGAACGAGUAACUGGGGAGAGGAAAGCAGAUUACCACAAUAUACAUUCAAAUUAA	0.66941	MNERVTGERKADYHNIHSN	UAA	AGAAATGAGA	YER133W|chrV;432425;432494|432430,432490,AAG	YER133W|chrV;432425;432494|WT	8;10;4;3;6;447;7186;2264;1467;2643;4176	1;6;9;4;4;821;3591;392;84;1365;1937	6.882,8.940,3.650,2.512,6.000,333.620,5397.791,1759.994,1128.017	0.860,5.364,8.213.3.349,4.000,612.756,2697.393,304.734,64.590	57.667	29.783	163.575	75.873	2.837	2.548	0.858017	0.815023	-0.0741654	6.52e-173	1.23e-172	239;12;1;2;156;1351;5047;3240;1403;2300;3404	6;9;2;2;334;940;2117;2481;1;1457;2204	237.665,9.704,1.000,1.720,139.685,1228.837,4360.726,2962.457,1168.282	5.966,7.278,2.000.1.720,299.069,855.001,1829.137,2268.474,0.833	49.274	31.214	133.565	86.48	2.711	2.771	0.844151	0.837624	-0.0111982	4.22e-12	4.93e-12
chrV:449376-449412	chrV;449319;449473	uORF	Scer	N	0.014	0.0274167	0.140333	36	57	61	AGAAGAUGA	AUG	ACGCAAAUGAUGAGAAAUAGUCAUCUAAAUUAG	0.830021	MTQMMRNSHLN	UAG	UGGAAGCUGA	YER138W-A|chrV;449319;449473|449376,AAG	YER138W-A|chrV;449319;449473|WT	530;1;0;0;0;0;2;0;0;130;0	1410;232;0;0;0;2;0;1;0;678;0	455.918,0.894,0.000,0.000,0.000,0.000,1.502,0.000,0.000	1212.915,207.414,0.000.0.000,0.000,1.493,0.000,0.777,0.000	2.836	14.793	0	0	0	0	0.0122041	0.0199843	0.711497	5.39e-06	6.09e-06	470;0;0;0;0;0;0;0;0;156;0	273;167;0;1;1;1;0;2;2;428;0	467.376,0.000,0.000,0.000,0.000,0.000,0.000,0.000,0.000	271.476,135.044,0.000.0.860,0.895,0.910,0.000,1.829,1.665	3.342	9.169	0	0	0	0	0.00793651	0.0418436	2.39843	9.04e-19	1.11e-18
chrV:449385-449412	chrV;449319;449473	uORF	Scer	N	0.003	0.0318519	0.140333	27	66	61	CGCAAAUGA	AUG	AUGAGAAAUAGUCAUCUAAAUUAG	0.867309	MMRNSHLN	UAG	UGGAAGCUGA	YER138W-A|chrV;449319;449473|449385,AAG	YER138W-A|chrV;449319;449473|WT	1535;12;213;2;0;0;0;1;2;683;0	1410;232;0;0;0;2;0;1;0;678;0	1320.443,10.728,194.380,1.674,0.000,0.000,0.000,0.777,1.538	1212.915,207.414,0.000.0.000,0.000,1.493,0.000,0.777,0.000	14.902	14.793	0	0	0	0	0.0415321	0.0199843	-1.05536	0.69478	0.708583	808;148;0;0;2;0;0;1;3;475;0	273;167;0;1;1;1;0;2;2;428;0	803.488,119.680,0.000,0.000,1.791,0.000,0.000,0.914,2.498	271.476,135.044,0.000.0.860,0.895,0.910,0.000,1.829,1.665	10.176	9.169	0	0	0	0	0.0214798	0.0418436	0.962027	8.58e-10	9.84e-10
chrV:449438-449444	chrV;449319;449473	uORF	Scer	N	0.993	0.9965	0.997333	6	119	29	UGAUAAUGU	AUG	UAA	1	M	UAA	UAGGAUCAAU	YER138W-A|chrV;449319;449473|449438,AAG	YER138W-A|chrV;449319;449473|WT	1768;1265;1;1;1;2;4;1;1;1855;0	1410;232;0;0;0;2;0;1;0;678;0	1520.875,1130.942,0.913,0.837,1.000,1.493,3.005,0.777,0.769	1212.915,207.414,0.000.0.000,0.000,1.493,0.000,0.777,0.000	40.474	14.793	0	0	0	0	0.0403624	0.0199843	-1.01415	1.35e-49	1.94e-49	2362;831;3;1;4;1;2;0;2;2123;0	273;167;0;1;1;1;0;2;2;428;0	2348.811,671.986,3.000,0.860,3.582,0.910,1.728,0.000,1.665	271.476,135.044,0.000.0.860,0.895,0.910,0.000,1.829,1.665	45.482	9.169	0	0	0	0	0.0245653	0.0418436	0.768386	6.4e-05	6.99e-05
chrV:449452-449470	chrV;449319;449473	uORF	Scer	N	0.997	0.825111	0.849	18	133	4	GAUCAAUGA	AUG	AAUAUUAACAUAUAA	0.837736	MNINI	UAA	AACGATGAGA	YER138W-A|chrV;449319;449473|449452,AAG	YER138W-A|chrV;449319;449473|WT	1239;2;0;0;1;0;0;1;1;700;0	1410;232;0;0;0;2;0;1;0;678;0	1065.817,1.788,0.000,0.000,1.000,0.000,0.000,0.777,0.769	1212.915,207.414,0.000.0.000,0.000,1.493,0.000,0.777,0.000	15.273	14.793	0	0	0	0	0.01136	0.0199843	0.814898	1.18e-09	1.38e-09	602;409;0;0;1;1;1;1;0;341;0	273;167;0;1;1;1;0;2;2;428;0	598.639,330.737,0.000,0.000,0.895,0.910,0.864,0.914,0.000	271.476,135.044,0.000.0.860,0.895,0.910,0.000,1.829,1.665	7.305	9.169	0	0	0	0	0.0336409	0.0418436	0.314788	0.78034	0.788237
chrV:451370-451358	chrV;451377;451243	uORF	Scer	N	0.064	0.0497143	0.014	12	7	115	AAGCAAUGG	AUG	GAAAAGUGA	0.893086	MEK	UGA	AGAAAGAGAC	YER139C|chrV;451377;451243|451370,AAG	YER139C|chrV;451377;451243|WT	5;5;1;4;172;494;1593;2312;623;2331;1933	1;105;1;0;0;0;0;0;0;244;0	4.301,4.470,0.913,3.349,172.000,368.698,1196.588,1797.308,479.042	0.860,93.873,0.913.0.000,0.000,0.000,0.000,0.000,0.000	50.859	5.324	75.716	0	1.489	0	0.851745	0.0773305	-3.46131	1.15e-62	1.73e-62	4;7;1;4;136;1343;3222;1851;1651;1707;2204	163;304;139;0;0;1;1;0;0;410;75	3.978,5.661,1.000,3.440,121.777,1221.560,2783.883,1692.441,1374.792	162.090,245.829,139.000.0.000,0.000,0.910,0.864,0.000,0.000	36.57	8.784	86.48	2.943	2.365	0.335	0.862673	0.0975427	-3.14471	0	0
chrV:472474-472429	chrV;472498;472424	uORF	Scer	N	0.00766667	0.0461277	0.244333	45	24	5	CUCGUCUGC	CUG	CUACCAUCAUCCAGGUACCGCUUUCCUUUCCAUCAUCAUUAA	0.690447	MLPSSRYRFPFHHH	UAA	AAAAAATGAG	YER151C|chrV;472498;472424|472474,472429,AAG	YER151C|chrV;472498;472424|WT	4;1;3;720;633;442;319;0;1;718;409	7;6;6;5;314;2024;2782;545;2;2014;3540	3.441,0.894,2.738,602.767,633.000,329.888,239.618,0.000,0.769	6.022,5.364,5.476.4.186,314.000,1510.619,2089.710,423.673,1.538	15.666	43.943	16.021	138.663	1.023	3.156	0.561889	0.771447	0.457282	0	0	2;2;0;1227;1911;511;2;0;3;1028;991	4;4;71;4;186;1989;2040;4;537;1741;2696	1.989,1.617,0.000,1055.193,1711.140,464.793,1.728,0.000,2.498	3.978,3.235,71.000.3.440,166.547,1809.146,1762.608,3.657,447.161	22.023	37.298	38.885	105.785	1.766	2.836	0.516071	0.777316	0.59093	0	0
chrV:4848-oORF	chrV;4732;4869	oORF	Scer	N	NA	NA	NA	NA	116	NA	AGGCCAUGC	AUG	NA	NA	NA	NA	NA	YEL075W-A|chrV;4732;4869|4848,AAG	YEL075W-A|chrV;4732;4869|WT	13;5;5;446;6353;7127;9;250;15;5187;434	7941;8097;6;220;150;18;9;9;16;12593;654	11.183,4.470,4.563,373.381,6353.000,5319.259,6.760,194.346,11.534	6831.035,7238.920,5.476.184.179,150.000,13.434,6.760,6.996,12.303	113.174	274.763	17	25.617	0.15	0.093	0.620811	0.0554729	-3.4843	0	0	6;16;4;42;7179;2498;320;14;9;7954;277	6372;7335;318;59;8;11;18;8;10;11531;83	5.966,12.938,4.000,36.119,6428.190,2272.120,276.487,12.801,7.494	6336.420,5931.432,318.000.50.739,7.163,10.005,15.552,7.315,8.327	170.403	247.034	10.869	3.257	0.064	0.013	0.595468	0.0481781	-3.62757	0	0
chrV:502950-oORF	chrV;502970;502894	oORF	Scer	N	NA	NA	NA	NA	20	NA	AUUUUAUGC	AUG	NA	NA	NA	NA	NA	YER162C|chrV;502970;502894|502950,AAG	YER162C|chrV;502970;502894|WT	36;1814;16380;3267;152;18;31;18;16;11140;859	575;9919;1209;117;5;17;14;13;12;5740;0	30.968,1621.761,14948.132,2735.057,152.000,13.434,23.286,13.993,12.303	494.628,8867.834,1103.315.97.950,5.000,12.688,10.516,10.106,9.227	243.06	125.239	33.647	0	0.138	0	0.255885	0.0971718	-1.39689	0	0	18;4322;18136;3977;776;22;24;8;803;12579;614	114;6646;956;390;89;7;10;9;9;5964;170	17.899,3494.976,18136.000,3420.133,694.843,20.011,20.737,7.315,668.660	113.363,5374.273,956.000.335.391,79.692,6.367,8.640,8.229,7.494	269.486	127.77	24.092	6.67	0.089	0.052	0.262824	0.117966	-1.15573	0	0
chrV:502961-502895	chrV;502970;502894	uORF	Scer	N	0.678	0.12525	0.291	66	9	1	AAUAUAUGC	AUG	CAAAUUUUAUGCAGUUCAAACAGGACGACAAGCAGAGACAUAACGACACUAUUUUUCCGCUAA	0.635602	MQILCSSNRTTSRDITTLFFR	UAA	AATGAGATCT	YER162C|chrV;502970;502894|502961,AAG	YER162C|chrV;502970;502894|WT	630;15702;1363;10;11;11;34;17;16;11630;0	575;9919;1209;117;5;17;14;13;12;5740;0	541.941,14037.980,1243.853,8.372,11.000,8.210,25.539,13.215,12.303	494.628,8867.834,1103.315.97.950,5.000,12.688,10.516,10.106,9.227	253.752	125.239	0	0	0	0	0.0908149	0.0971718	0.0976087	0.00193	0.00211	655;18192;2238;9;14;22;20;14;19;11309;97	114;6646;956;390;89;7;10;9;9;5964;170	651.343,14710.921,2238.000,7.740,12.536,20.011,17.280,12.801,15.821	113.363,5374.273,956.000.335.391,79.692,6.367,8.640,8.229,7.494	242.278	127.77	3.806	6.67	0.016	0.052	0.0936787	0.117966	0.332574	8.28e-31	1.08e-30
chrV:503790-oORF	chrV;503821;503782	oORF	Scer	N	NA	NA	NA	NA	31	NA	GUUGUAUGG	AUG	NA	NA	NA	NA	NA	YER163C|chrV;503821;503782|503790,AAG	YER163C|chrV;503821;503782|WT	0;0;1;190;88;0;0;0;0;178;209	0;2;21;15;963;434;102;1;1;520;637	0.000,0.000,0.913,159.064,88.000,0.000,0.000,0.000,0.000	0.000,1.788,19.164.12.558,963.000,323.917,76.618,0.777,0.769	3.884	11.346	8.187	24.951	2.108	2.199	0.446576	0.597458	0.41993	5.62e-72	8.72e-72	1;0;27;272;139;80;80;0;0;266;132	1;4;1;159;618;780;163;1;2;447;550	0.994,0.000,27.000,233.914,124.463,72.766,69.122,0.000,0.000	0.994,3.235,1.000.136.737,553.367,709.469,140.836,0.914,1.665	5.699	9.576	5.179	21.581	0.909	2.254	0.517368	0.631055	0.286575	2.13e-41	2.91e-41
chrV:526965-526998	chrV;526956;527081	uORF	Scer	N	0.069	0.0467273	0.00166667	33	9	83	UAUAUAUGU	AUG	UAUAUCUUAAAGUUGACAAAGUACUGUUAG	0.849649	MYILKLTKYC	UAG	CCAUUCAUAG	YER171W|chrV;526956;527081|526965,AAG	YER171W|chrV;526956;527081|WT	4;1;3;267;332;1874;2657;4;643;2173;643	3;2;2389;985;2;2;2;3;1;1532;686	3.441,0.894,2.738,223.526,332.000,1398.666,1995.816,3.110,494.421	2.581,1.788,2180.164.824.619,2.000,1.493,1.502,2.332,0.769	47.412	33.426	25.186	26.871	0.531	0.804	0.76783	0.286632	-1.42158	0	0	7;4;3;5;966;2643;3004;418;0;1933;619	1;1;3099;1907;2;0;1;4;3;1669;682	6.961,3.235,3.000,4.300,864.972,2404.008,2595.526,382.194,0.000	0.994,0.809,3099.000.1639.978,1.791,0.000,0.864,3.657,2.498	41.412	35.756	24.288	26.76	0.586	0.748	0.752152	0.288634	-1.38178	0	0
chrV:559319-559427	chrV;559316;559453	uORF	Scer	N	0.0523333	0.0971944	0.17	108	3	26	ND-too-cl	AUG	AAUCAGUAUAAAAGCACCUACCGAAUCAAUUGUGGGAUGUAUAGUCUCUUGCCUCAAAAUGUCCAGGAUAGUAGGUUAAUAGUGUCCAAUUACAUAGCUACUUAA	0.67677	MNQYKSTYRINCGMYSLLPQNVQDSRLIVSNYIAT	UAA	UCUUUUAUUG	YER185W|chrV;559316;559453|559319,AAG	YER185W|chrV;559316;559453|WT	7383;3416;2;300;176;4;9;6;7;5234;0	12904;9006;7;54;6;16;13;16;8;7264;264	6351.030,3053.989,1.825,251.153,176.000,2.985,6.760,4.664,5.382	11100.324,8051.589,6.388.45.208,6.000,11.942,9.765,12.438,6.151	114.199	158.491	0	10.341	0	0.065	0.0508612	0.0398409	-0.352317	1.94e-12	2.32e-12	9680;5184;2;3;5;8;10;6;8;5595;107	8761;6746;418;16;9;11;15;12;17;7602;427	9625.949,4192.030,2.000,2.580,4.477,7.277,8.640,5.486,6.662	8712.080,5455.138,418.000.13.760,8.059,10.005,12.960,10.972,14.156	119.865	162.862	4.198	16.755	0.035	0.103	0.0293135	0.0417986	0.511888	2.3e-57	3.35e-57
chrV:559358-559427	chrV;559316;559453	uORF	Scer	N	0.000333333	0.0326087	0.17	69	42	26	GUGGGAUGU	AUG	UAUAGUCUCUUGCCUCAAAAUGUCCAGGAUAGUAGGUUAAUAGUGUCCAAUUACAUAGCUACUUAA	0.711799	MYSLLPQNVQDSRLIVSNYIAT	UAA	UCUUUUAUUG	YER185W|chrV;559316;559453|559358,AAG	YER185W|chrV;559316;559453|WT	10500;6790;4;8;8;10;21;9;7;5353;570	12904;9006;7;54;6;16;13;16;8;7264;264	9032.346,6070.430,3.650,6.697,8.000,7.464,15.774,6.996,5.382	11100.324,8051.589,6.388.45.208,6.000,11.942,9.765,12.438,6.151	116.796	158.491	22.327	10.341	0.191	0.065	0.0382214	0.0398409	0.059868	0.0015662	0.00171191	10083;4218;3;4;7;11;7;6;7;5837;364	8761;6746;418;16;9;11;15;12;17;7602;427	10026.698,3410.876,3.000,3.440,6.268,10.005,6.048,5.486,5.829	8712.080,5455.138,418.000.13.760,8.059,10.005,12.960,10.972,14.156	125.049	162.862	14.283	16.755	0.114	0.103	0.0263118	0.0417986	0.667746	2.65e-114	4.48e-114
chrV:559380-559401	chrV;559316;559453	uORF	Scer	N	0.0133333	0.0151429	0.014	21	64	52	UCAAAAUGU	AUG	UCCAGGAUAGUAGGUUAA	0.672399	MSRIVG	UAA	UAGUGUCCAA	YER185W|chrV;559316;559453|559380,AAG	YER185W|chrV;559316;559453|WT	7272;5727;39;5;6;9;10;5;4;6034;0	12904;9006;7;54;6;16;13;16;8;7264;264	6255.545,5120.081,35.591,4.186,6.000,6.717,7.512,3.887,3.076	11100.324,8051.589,6.388.45.208,6.000,11.942,9.765,12.438,6.151	131.654	158.491	0	10.341	0	0.065	0.0417052	0.0398409	-0.0659774	8.91e-06	1e-05	6185;6853;93;6;8;11;10;7;7;5804;71	8761;6746;418;16;9;11;15;12;17;7602;427	6150.464,5541.663,93.000,5.160,7.163,10.005,8.640,6.400,5.829	8712.080,5455.138,418.000.13.760,8.059,10.005,12.960,10.972,14.156	124.342	162.862	2.786	16.755	0.022	0.103	0.0423833	0.0417986	-0.0200393	7.05e-19	8.62e-19
chrV:569960-oORF	chrV;570048;569907	oORF	Scer	N	NA	NA	NA	NA	88	NA	CACGGAUGC	AUG	NA	NA	NA	NA	NA	YER188C-A|chrV;570048;569907|569960,AAG	YER188C-A|chrV;570048;569907|WT	21487;8286;171;428;201;23;156;18;19;15905;299	35932;3167;14;7;13;22;30;29;24;20891;591	18483.622,7407.891,156.052,358.312,201.000,17.166,117.180,13.993,14.610	30909.550,2831.377,12.776.5.860,13.000,16.420,22.535,22.544,18.454	347.027	455.815	11.712	23.15	0.034	0.051	0.0429407	0.0165952	-1.37158	0	0	24669;10576;247;420;51;21;22;13;16;21044;623	37285;6445;81;16;18;29;27;15;28;21696;616	24531.253,8552.259,247.000,361.191,45.666,19.101,19.009,11.886,13.323	37076.808,5211.735,81.000.13.760,16.117,26.378,23.329,13.715,23.316	450.836	464.804	24.445	24.17	0.054	0.052	0.0320604	0.0182857	-0.810078	3.17e-272	6.84e-272
chrV:569977-oORF	chrV;570048;569907	oORF	Scer	N	NA	NA	NA	NA	71	NA	CUGAUAUGG	AUG	NA	NA	NA	NA	NA	YER188C-A|chrV;570048;569907|569977,AAG	YER188C-A|chrV;570048;569907|WT	30230;3821;6;8;8;12;24;16;24;12930;627	35932;3167;14;7;13;22;30;29;24;20891;591	26004.555,3416.069,5.476,6.697,8.000,8.956,18.028,12.438,18.454	30909.550,2831.377,12.776.5.860,13.000,16.420,22.535,22.544,18.454	282.116	455.815	24.56	23.15	0.087	0.051	0.0184014	0.0165952	-0.149049	8.68e-12	1.03e-11	29315;4826;9;6;11;18;25;8;1322;16907;773	37285;6445;81;16;18;29;27;15;28;21696;616	29151.311,3902.534,9.000,5.160,9.850,16.372,21.601,7.315,1100.833	37076.808,5211.735,81.000.13.760,16.117,26.378,23.329,13.715,23.316	362.207	464.804	30.331	24.17	0.084	0.052	0.0484746	0.0182857	-1.40652	3.79e-09	4.32e-09
chrV:570008-569978	chrV;570048;569907	uORF	Scer	N	0.0676667	0.03825	0.018	30	40	71	ACCACAUGC	AUG	CCAUACUCACCCUCACUUGUAUACUGA	0.697563	MPYSPSLVY	UGA	UAUGGCAUAC	YER188C-A|chrV;570048;569907|570008,AAG	YER188C-A|chrV;570048;569907|WT	16336;11175;84;12;20;19;26;12;13;12968;649	35932;3167;14;7;13;22;30;29;24;20891;591	14052.611,9990.729,76.657,10.046,20.000,14.181,19.530,9.329,9.996	30909.550,2831.377,12.776.5.860,13.000,16.420,22.535,22.544,18.454	282.945	455.815	25.421	23.15	0.09	0.051	0.0397424	0.0165952	-1.25991	0	0	19569;12616;70;6;394;21;14;16;24;14161;567	37285;6445;81;16;18;29;27;15;28;21696;616	19459.730,10201.901,70.000,5.160,352.794,19.101,12.096,14.629,19.985	37076.808,5211.735,81.000.13.760,16.117,26.378,23.329,13.715,23.316	303.378	464.804	22.248	24.17	0.073	0.052	0.0382842	0.0182857	-1.06604	0	0
chrV:6028-6124	chrV;5959;6125	uORF	Scer	N	0.996	0.992469	0.995333	96	69	2	UUUCCAUGG	AUG	GUGCACAGUAUCUUAACUAUCUGCUUAGUCGAGGAGAACCAGGAUUCUGUUCGUUGCUCAGCCGCUUCGUGGAUAUUCUGUUGGAUACUUUAA	0.668168	MVHSILTICLVEENQDSVRCSAASWIFCWIL	UAA	ACATGAGATC	YEL074W|chrV;5959;6125|6028,AAG	YEL074W|chrV;5959;6125|WT	2;3;2;1913;2129;344;4;0;2;1754;127	5281;1587;1;4;2;1;4;3;4;3045;0	1.720,2.682,1.825,1601.520,2129.000,256.746,3.005,0.000,1.538	4542.840,1418.818,0.913.3.349,2.000,0.746,3.005,2.332,3.076	38.27	66.438	4.975	0	0.13	0	0.496457	0.0268957	-4.20622	0	0	5;3;336;2965;665;352;2;0;4;1702;274	4606;840;0;4;1;2;0;4;2;3894;36	4.972,2.426,336.000,2549.835,595.451,320.171,1.728,0.000,3.331	4580.281,679.264,0.000.3.440,0.895,1.819,0.000,3.657,1.665	36.463	83.423	10.751	1.413	0.295	0.017	0.421876	0.0178474	-4.56304	0	0
chrV:63573-63588	chrV;63559;63727	uORF	Scer	N	0.000333333	0.00166667	0.00133333	15	14	139	CAAUAAUGU	AUG	UUCAUGAGGUGA	0.744057	MFMR	UGA	AAGGUGGCCC	YEL049W|chrV;63559;63727|63573,AAG	YEL049W|chrV;63559;63727|WT	574;3670;1;1;0;3;7;1;2;2786;1	1308;316;2;0;0;3;1;2;1;1722;0	493.768,3281.072,0.913,0.837,0.000,2.239,5.258,0.777,1.538	1125.172,282.512,1.825.0.000,0.000,2.239,0.751,1.555,0.769	60.787	37.572	0.039	0	0.001	0	0.0699611	0.0263501	-1.40875	2.99e-294	6.63e-294	518;3739;284;1;1;7;6;3;5;2718;402	983;1213;94;1;117;2;0;1;0;1383;174	515.108,3023.534,284.000,0.860,0.895,6.367,5.184,2.743,4.164	977.511,980.890,94.000.0.860,104.764,1.819,0.000,0.914,0.000	58.229	29.629	15.774	6.827	0.271	0.23	0.079693	0.0742832	-0.101417	2.73e-71	4.15e-71
chrV:70470-oORF	chrV;70440;70477	oORF	Scer	N	NA	NA	NA	NA	30	NA	AACACAUGC	AUG	NA	NA	NA	NA	NA	YEL043W|chrV;70440;70477|70470,AAG	YEL043W|chrV;70440;70477|WT	14;52;0;0;0;0;1;0;1;86;21	35;401;0;0;0;2;0;0;0;276;80	12.043,46.489,0.000,0.000,0.000,0.000,0.751,0.000,0.769	30.108,358.504,0.000.0.000,0.000,1.493,0.000,0.000,0.000	1.876	6.022	0.823	3.134	0.439	0.52	0.0891197	0.0741525	-0.265249	0.18498	0.192989	60;181;0;0;0;1;0;0;0;157;0	21;543;24;1;1;0;0;1;0;274;87	59.665,146.365,0.000,0.000,0.000,0.910,0.000,0.000,0.000	20.883,439.096,24.000.0.860,0.895,0.000,0.000,0.914,0.000	3.363	5.87	0	3.414	0	0.582	0.0561661	0.0805823	0.520765	4.02e-09	4.58e-09
chrV:7619-7580	chrV;7726;7553	uORF	Scer	N	0.00433333	0.0134634	0.001	39	107	27	UAUAAAUGG	AUG	GUAGCGAGAUGGUGCUUCUGUAAAGUUAUCUAUUAA	0.764213	MVARWCFCKVIY	UAA	CGAAAUAACA	YEL073C|chrV;7726;7553|7619,AAG	YEL073C|chrV;7726;7553|WT	3;1446;2729;282;0;4;4;0;2;2225;0	110;2075;0;0;1;3;2;2;1;1306;85	2.581,1292.760,2490.443,236.084,0.000,2.985,3.005,0.000,1.538	94.625,1855.102,0.000.0.000,1.000,2.239,1.502,1.555,0.769	48.547	28.495	0	3.329	0	0.117	0.201013	0.0765132	-1.39351	0	0	2;1221;1351;483;2;2;3;1;2;2523;56	197;1034;0;0;0;2;0;2;0;798;0	1.989,987.359,1351.000,415.369,1.791,1.819,2.592,0.914,1.665	195.900,836.142,0.000.0.000,0.000,1.819,0.000,1.829,0.000	54.052	17.096	2.197	0	0.041	0	0.201925	0.0623058	-1.69638	4.36e-245	9.14e-245
chrV:7702-7672	chrV;7726;7553	uORF	Scer	N	0.00433333	0.001125	0.000333333	30	24	119	UAUUAAUGA	AUG	AACGACUUAAAAUGCAUAAUCUCCUAA	0.709153	MNDLKCIIS	UAA	ACGGUCGAGC	YEL073C|chrV;7726;7553|7702,AAG	YEL073C|chrV;7726;7553|WT	1;2129;245;1;2;4;3;3;2;2127;0	110;2075;0;0;1;3;2;2;1;1306;85	0.860,1903.379,223.583,0.837,2.000,2.985,2.253,2.332,1.538	94.625,1855.102,0.000.0.000,1.000,2.239,1.502,1.555,0.769	46.408	28.495	0	3.329	0	0.117	0.0987027	0.0765132	-0.367381	1.93e-16	2.38e-16	500;4218;81;4;1;0;2;3;4;2633;0	197;1034;0;0;0;2;0;2;0;798;0	497.208,3410.876,81.000,3.440,0.895,0.000,1.728,2.743,3.331	195.900,836.142,0.000.0.000,0.000,1.819,0.000,1.829,0.000	56.408	17.096	0	0	0	0	0.069328	0.0623058	-0.154072	6.11e-05	6.67e-05
chrV:80415-80448	chrV;80414;80461	uORF	Scer	N	0.00133333	0.0269394	0.131	33	1	13	ND-too-cl	AUG	GAAUGGUCAUUGGGCAAAAGGUCCUGCUAG	0.752018	MEWSLGKRSC	UAG	CUCGUAUACC	YEL038W|chrV;80414;80461|80415,AAG	YEL038W|chrV;80414;80461|WT	2;1;3;0;0;120;1278;205;87;336;832	3;232;960;107;21;0;2;1;0;669;455	1.720,0.894,2.738,0.000,0.000,89.562,959.975,159.363,66.897	2.581,207.414,876.081.89.578,21.000,0.000,1.502,0.777,0.000	7.331	14.597	32.59	17.822	4.446	1.221	0.835198	0.233731	-1.83727	0	0	0;0;0;1;1;109;190;207;1;421;1257	0;263;1168;133;56;37;4;1;1;829;936	0.000,0.000,0.000,0.860,0.895,99.144,164.164,189.268,0.833	0.000,212.674,1168.000.114.377,50.143,33.654,3.456,0.914,0.833	9.019	17.76	49.322	36.727	5.469	2.068	0.846728	0.248486	-1.76874	2.07e-229	4.24e-229
chrV:84572-oORF	chrV;84697;84552	oORF	Scer	Y	NA	NA	NA	NA	125	NA	CUUUCAUGC	AUG	NA	NA	NA	NA	NA	YEL036C|chrV;84697;84552|84572,84552,AAG	YEL036C|chrV;84697;84552|WT	42;25;66;15;1469;12616;19380;6730;770;11154;10637	681;114;1534;19315;13983;3751;31;20;11;16757;12122	36.129,22.351,60.231,12.558,1469.000,9415.992,14557.361,5231.783,592.074	585.812,101.919,1399.904.16170.074,13983.000,2799.571,23.286,15.548,8.458	243.366	365.616	416.654	474.822	1.712	1.299	0.792087	0.467349	-0.76116	0	0	32;32;9;247;1168;18916;16577;4703;2249;10393;9599	68;39;1658;18158;12785;1845;41;22;31;17787;12003	31.821,25.877,9.000,212.415,1045.846,17205.532,14322.915,4300.134,1872.749	67.620,31.537,1658.000.15615.484,11447.891,1678.167,35.425,20.115,25.814	222.655	381.06	376.643	470.971	1.692	1.236	0.787297	0.453741	-0.795038	0	0
chrV:84612-84591	chrV;84697;84552	uORF	Scer	N	0.00233333	0.0243478	0.128667	21	85	39	UCAUCAUCU	AUC	UUUUUUUCGCUCCAUUAA	0.652647	MFFSLH	UAA	ACAGUUCCUU	YEL036C|chrV;84697;84552|84612,84591,AAG	YEL036C|chrV;84697;84552|WT	22;9;322;5746;10529;5669;1383;13;6;9305;8247	681;114;1534;19315;13983;3751;31;20;11;16757;12122	18.925,8.046,293.852,4810.419,10529.000,4231.076,1038.846,10.106,4.614	585.812,101.919,1399.904.16170.074,13983.000,2799.571,23.286,15.548,8.458	203.023	365.616	323.037	474.822	1.591	1.299	0.555575	0.467349	-0.249482	0	0	20;22;377;8381;12047;3732;9;11;10;8840;6579	68;39;1658;18158;12785;1845;41;22;31;17787;12003	19.888,17.790,377.000,7207.477,10787.074,3394.536,7.776,10.058,8.327	67.620,31.537,1658.000.15615.484,11447.891,1678.167,35.425,20.115,25.814	189.384	381.06	258.145	470.971	1.363	1.236	0.511521	0.453741	-0.172925	0	0
chrV:85656-oORF	chrV;85622;85675	oORF	Scer	Y	NA	NA	NA	NA	34	NA	CACAAAUAC	AUA	NA	NA	NA	NA	NA	YEL034W|chrV;85622;85675|85656,85675,AAG	YEL034W|chrV;85622;85675|WT	3;1;2;0;21;83;1422;876;383;810;2900	8;1;2;0;1;129;1272;709;475;1206;2166	2.581,0.894,1.825,0.000,21.000,61.947,1068.141,680.987,294.499	6.882,0.894,1.825.0.000,1.000,96.280,955.468,551.164,365.241	17.673	26.313	113.594	84.843	6.428	3.224	0.864466	0.868347	0.006462	0.281	0.292	0;4;23;1;0;82;773;811;1086;880;2425	5;3;5;14;0;287;1433;1855;210;915;2690	0.000,3.235,23.000,0.860,0.000,74.585,667.890,741.529,904.315	4.972,2.426,5.000.12.040,0.000,261.048,1238.145,1696.098,174.868	18.853	19.603	95.152	105.55	5.047	5.384	0.915802	0.877887	-0.0609999	1.21e-89	1.94e-89
chrV:86168-oORF	chrV;86159;86178	oORF	Scer	N	NA	NA	NA	NA	9	NA	AUGGCAUGG	AUG	NA	NA	NA	NA	NA	YEL033W|chrV;86159;86178|86168,AAG	YEL033W|chrV;86159;86178|WT	2;263;0;0;0;0;0;0;0;106;6	178;227;0;0;0;0;0;0;0;190;65	1.720,235.129,0.000,0.000,0.000,0.000,0.000,0.000,0.000	153.120,202.944,0.000.0.000,0.000,0.000,0.000,0.000,0.000	2.313	4.146	0.235	2.546	0.102	0.614	0.0757015	0.0470256	-0.686875	2.19e-18	2.73e-18	66;188;7;0;0;0;0;1;0;191;47	204;162;0;0;0;0;0;0;1;188;153	65.631,152.026,7.000,0.000,0.000,0.000,0.000,0.914,0.000	202.861,131.001,0.000.0.000,0.000,0.000,0.000,0.000,0.833	4.092	4.028	1.844	6.003	0.451	1.49	0.0626566	0.0358324	-0.806203	3.67e-11	4.26e-11
chrVI:103177-oORF	chrVI;103212;103127	oORF	Scer	N	NA	NA	NA	NA	35	NA	CGGUUUUGU	UUG	NA	NA	NA	NA	NA	YFL018C|chrVI;103212;103127|103177,103127,AAG	YFL018C|chrVI;103212;103127|WT	10;5;7;5;9;182;55;3728;12903;3159;2781	6;3;7;4;126;4;259;3163;6169;3309;2439	8.602,4.470,6.388,4.186,9.000,135.836,41.313,2898.081,9921.476	5.161,2.682,6.388.3.349,126.000,2.985,194.549,2458.860,4743.516	68.925	72.198	108.932	95.536	1.58	1.323	0.969923	0.94988	-0.0301251	8.24e-61	1.23e-60	10;11;1;55;4;6;212;3609;10595;2962;3353	10;4;4;4;2;2;459;3479;6550;2643;2815	9.944,8.895,1.000,47.299,3.582,5.457,183.173,3299.848,8822.487	9.944,3.235,4.000.3.440,1.791,1.819,396.587,3180.984,5454.204	63.456	56.622	131.564	110.454	2.073	1.951	0.974325	0.965602	-0.0129742	4.41e-47	6.18e-47
chrVI:11013-oORF	chrVI;11020;10969	oORF	Scer	N	NA	NA	NA	NA	7	NA	UUACCAUGA	AUG	NA	NA	NA	NA	NA	YFL060C|chrVI;11020;10969|11013,AAG	YFL060C|chrVI;11020;10969|WT	2;1;560;427;180;54;0;1;1;530;334	865;590;0;1;0;2;1;2;0;437;52	1.720,0.894,511.047,357.475,180.000,40.303,0.000,0.777,0.769	744.093,527.475,0.000.0.837,0.000,1.493,0.751,1.555,0.000	11.564	9.535	13.083	2.037	1.131	0.214	0.361224	0.0398815	-3.1791	0	0	1;2;231;406;6;1;0;0;0;609;142	698;198;1;44;0;0;2;2;0;631;121	0.994,1.617,231.000,349.151,5.372,0.910,0.000,0.000,0.000	694.103,160.112,1.000.37.839,0.000,0.000,1.728,1.829,0.000	13.047	13.518	5.572	4.748	0.427	0.351	0.325531	0.0394533	-3.04458	4.86e-203	9.59e-203
chrVI:147095-147131	chrVI;147092;147130	uORF	Scer	N	0.000333333	0.1785	0.784667	36	3	0	ND-too-cl	AUG	NA	NA	NA	NA	ATGAGATCTA	YFL001W|chrVI;147092;147130|147095,AAG	YFL001W|chrVI;147092;147130|WT	1;0;7;63;446;60;83;0;2;220;513	1;188;660;10;12;0;0;0;0;237;236	0.860,0.000,6.388,52.742,446.000,44.781,62.346,0.000,1.538	0.860,168.077,602.306.8.372,12.000,0.000,0.000,0.000,0.000	4.8	5.171	20.094	9.244	4.186	1.788	0.574393	0.216054	-1.41065	3.78e-216	7.64e-216	1;0;1;45;273;40;203;1;0;303;533	0;126;394;10;0;1;0;1;2;269;328	0.994,0.000,1.000,38.699,244.449,36.383,175.397,0.914,0.000	0.000,101.890,394.000.8.600,0.000,0.910,0.000,0.914,1.665	6.491	5.763	20.914	12.87	3.222	2.233	0.647974	0.212543	-1.60818	2.43e-159	4.5e-159
chrVI:155917-oORF	chrVI;155917;155873	oORF	Scer	N	NA	NA	NA	NA	0	NA	ND-too-cl	AUG	NA	NA	NA	NA	NA	YFR005C|chrVI;155917;155873|155917,AAG	YFR005C|chrVI;155917;155873|WT	1;0;1;0;0;406;52;305;117;183;750	35;381;1;0;1;0;0;0;1;351;33	0.860,0.000,0.913,0.000,0.000,303.019,39.060,237.102,89.965	30.108,340.624,0.913.0.000,1.000,0.000,0.000,0.000,0.769	3.993	7.658	29.378	1.293	7.357	0.169	0.818488	0.0761134	-3.42674	6.98e-157	1.29e-156	0;0;0;0;58;323;623;127;2;279;711	0;424;20;1;0;0;1;1;1;396;168	0.000,0.000,0.000,0.000,51.934,293.793,538.287,116.121,1.665	0.000,342.867,20.000.0.860,0.000,0.000,0.864,0.914,0.833	5.977	8.484	27.898	6.592	4.668	0.777	0.797042	0.088725	-3.16724	9.59e-173	1.81e-172
chrVI:167796-167817	chrVI;167782;167887	uORF	Scer	N	0.002	0.000952381	0	21	14	70	CUUUUAUGA	AUG	AUCUGUCCUUACGCGUAA	0.681293	MICPYA	UAA	UAAUUACAAG	YFR012W|chrVI;167782;167887|167796,AAG	YFR012W|chrVI;167782;167887|WT	3;1;203;462;2410;1178;2;1;3;1551;866	5;3913;2171;284;5;6;4;2;3;2745;336	2.581,0.894,185.255,386.776,2410.000,879.204,1.502,0.777,2.307	4.301,3498.320,1981.221.237.758,5.000,4.478,3.005,1.555,2.307	33.841	59.892	33.921	13.161	1.002	0.22	0.556728	0.150028	-1.89174	0	0	1;3;145;408;1453;401;121;1;2;1536;782	319;3872;1296;3;80;5;5;4;5;3066;266	0.994,2.426,145.000,350.871,1301.039,364.740,104.547,0.914,1.665	317.219,3131.084,1296.000.2.580,71.633,4.548,4.320,3.657,4.164	32.907	65.684	30.684	10.437	0.932	0.159	0.540764	0.122304	-2.14453	0	0
chrVI:176438-176432	chrVI;176480;176391	uORF	Scer	N	0.0313333	0.032875	0.0333333	6	42	41	GAAACCUGU	CUG	UGA	1	M	UGA	AGAAAAAGAA	YFR015C|chrVI;176480;176391|176438,176432,AAG	YFR015C|chrVI;176480;176391|WT	21;30;130;8;85;13006;14147;4881;284;9784;4821	12;5;3;5;31;4275;3453;604;235;4052;1901	18.065,26.821,118.636,6.697,85.000,9707.070,10626.573,3794.403,218.376	10.323,4.470,2.738.4.186,31.000,3190.660,2593.734,469.539,180.698	213.474	88.409	188.84	74.463	0.885	0.842	0.788965	0.77725	-0.0215831	1.21e-43	1.7e-43	19;29;76;12;544;8166;16170;4898;3745;8676;6588	9;10;2;5;1263;3527;2767;1009;5;3712;1775	18.894,23.451,76.000,10.320,487.106,7427.594,13971.257,4478.430,3118.472	8.950,8.086,2.000.4.300,1130.910,3208.073,2390.753,922.568,4.164	185.87	79.524	258.498	69.647	1.391	0.876	0.829614	0.749891	-0.14576	0	0
chrVI:207406-207421	chrVI;207376;207451	uORF	Scer	Y	0.000666667	0.00546667	0.000333333	15	30	30	UAUCUAUGU	AUG	UUUACAUAUUAG	0.973451	MFTY	UAG	GGUUCAACAG	YFR027W|chrVI;207376;207451|207406,207421,AAG	YFR027W|chrVI;207376;207451|WT	24;20;11;8;12;17;3902;9412;15276;8056;242	12;13;777;10065;3923;963;23;12;15;7064;0	20.645,17.880,10.038,6.697,12.000,12.688,2931.002,7316.723,11746.142	10.323,11.622,709.078.8426.187,3923.000,718.738,17.277,9.329,11.534	175.772	154.127	9.479	0	0.054	0	0.938282	0.445699	-1.07395	0	0	25;26;6;11;13;463;4116;9982;15120;8086;271	15;25;899;11292;9808;681;15;17;18;7346;379	24.860,21.025,6.000,9.460,11.640,421.133,3556.320,9126.928,12590.468	14.916,20.216,899.000.9710.873,8782.238,619.421,12.960,15.544,14.989	173.23	157.377	10.633	14.871	0.061	0.094	0.945577	0.458037	-1.04573	0	0
chrVI:224816-224786	chrVI;224875;224769	uORF	Scer	Y	0.292	0.145156	0.0626667	30	59	17	CACACAUAU	AUA	UACACUUACACCUACACACACGGAUAA	0.742598	MYTYTYTHG	UAA	AGAAAAAGAA	YFR033C|chrVI;224875;224769|224816,224786,AAG	YFR033C|chrVI;224875;224769|WT	2;5;1;2;4;3;560;1642;3374;2560;342	0;3;0;0;1;0;1207;575;490;588;532	1.720,4.470,0.913,1.674,4.000,2.239,420.646,1276.462,2594.363	0.000,2.682,0.000.0.000,1.000,0.000,906.643,446.995,376.775	55.856	12.829	13.396	20.839	0.24	1.624	0.948103	0.880965	-0.105958	7.24e-214	1.46e-213	7;2;5;2;4;6;2601;1931;5831;2064;778	5;1;1;0;0;0;0;951;0;356;293	6.961,1.617,5.000,1.720,3.582,5.457,2247.325,1765.588,4855.490	4.972,0.809,1.000.0.000,0.000,0.000,0.000,869.536,0.000	44.218	7.627	30.527	11.497	0.69	1.507	0.943672	0.92078	-0.0354296	9.12e-48	1.28e-47
chrVI:22805-22796	chrVI;22859;22787	uORF	Scer	N	0.0313333	0.114818	0.283333	9	54	9	GAUAUAUGA	AUG	AUCUAG	0.751809	MI	UAG	ACCCAAGTAA	YFL054C|chrVI;22859;22787|22805,22796,AAG	YFL054C|chrVI;22859;22787|WT	5;0;4;2;124;328;2516;2313;2;1307;1255	12;5;121;5904;4051;103;469;4;7;4576;1053	4.301,0.000,3.650,1.674,124.000,244.804,1889.903,1798.085,1.538	10.323,4.470,110.423.4942.693,4051.000,76.874,352.291,3.110,5.382	28.517	99.842	49.159	41.246	1.724	0.413	0.839276	0.475242	-0.820484	0	0	4;5;0;2;61;271;2135;2580;356;1929;343	7;11;341;5243;3767;1122;185;7;12;3959;759	3.978,4.043,0.000,1.720,54.620,246.495,1844.690,2358.994,296.442	6.961,8.895,341.000.4508.866,3373.031,1020.544,159.844,6.400,9.992	41.326	84.816	13.459	29.781	0.326	0.351	0.881882	0.478842	-0.881035	0	0
chrVI:233673-233649	chrVI;233673;233544	uORF	Scer	N	0.295333	0.100808	0.0103333	24	0	105	ND-too-cl	AUG	GCAUCGAGGCUUCCUUUUUGA	0.646102	MASRLPF	UGA	CUAUUGGAAG	YFR039C|chrVI;233673;233544|233673,AAG	YFR039C|chrVI;233673;233544|WT	6;4;5;50;3;4;3587;4007;3165;2113;2814	4;7;4207;1886;3;5;9;4;2;1972;356	5.161,3.576,4.563,41.859,3.000,2.985,2694.389,3114.971,2433.657	3.441,6.258,3839.242.1578.916,3.000,3.732,6.760,3.110,1.538	46.103	43.026	110.225	13.945	2.391	0.324	0.898693	0.289169	-1.63591	0	0	7;4;3;67;4;748;1978;2711;1224;2282;1418	155;408;4444;1507;450;1;2;1;6;1948;226	6.961,3.235,3.000,57.619,3.582,680.363,1709.038,2478.772,1019.228	154.135,329.928,4444.000.1295.987,402.937,0.910,1.728,0.914,4.996	48.888	41.733	55.639	8.868	1.138	0.212	0.882705	0.272048	-1.69807	0	0
chrVI:246094-oORF	chrVI;246093;246145	oORF	Scer	N	NA	NA	NA	NA	1	NA	ND-too-cl	AUG	NA	NA	NA	NA	NA	YFR048W|chrVI;246093;246145|246094,AAG	YFR048W|chrVI;246093;246145|WT	2;3;1;189;1045;917;3;45;2;1108;1913	2;391;2659;695;23;1;4;2;0;1499;982	1.720,2.682,0.913,158.226,1045.000,684.406,2.253,34.982,1.538	1.720,349.564,2426.562.581.838,23.000,0.746,3.005,1.555,0.000	24.175	32.706	74.933	38.465	3.1	1.176	0.600167	0.256219	-1.22799	0	0	2;3;2;214;1283;457;84;71;3;1048;1827	22;648;2556;465;3;4;9;0;3;1985;734	1.989,2.426,2.000,184.035,1148.818,415.676,72.578,64.918,2.498	21.877,524.004,2556.000.399.890,2.686,3.638,7.776,0.000,2.498	22.452	42.526	71.687	28.801	3.193	0.677	0.589387	0.230853	-1.35224	0	0
chrVI:246108-oORF	chrVI;246093;246145	oORF	Scer	N	NA	NA	NA	NA	15	NA	UGCAUAUGG	AUG	NA	NA	NA	NA	NA	YFR048W|chrVI;246093;246145|246108,AAG	YFR048W|chrVI;246093;246145|WT	3;0;962;1001;93;3;1;2;3;684;423	2;391;2659;695;23;1;4;2;0;1499;982	2.581,0.000,877.906,838.014,93.000,2.239,0.751,1.555,2.307	1.720,349.564,2426.562.581.838,23.000,0.746,3.005,1.555,0.000	14.924	32.706	16.569	38.465	1.11	1.176	0.330443	0.256219	-0.367028	1.08e-119	1.86e-119	1;4;1192;1188;280;2;0;1;1;1058;409	22;648;2556;465;3;4;9;0;3;1985;734	0.994,3.235,1192.000,1021.654,250.716,1.819,0.000,0.914,0.833	21.877,524.004,2556.000.399.890,2.686,3.638,7.776,0.000,2.498	22.666	42.526	16.048	28.801	0.708	0.677	0.329078	0.230853	-0.511457	2.94e-220	5.93e-220
chrVI:248431-248458	chrVI;248360;248522	uORF	Scer	Y	0.995667	0.999778	1	27	71	64	GCCGCAUUG	AUU	GAAUUCUUUAAAGCAAACCAUUAA	0.883325	MEFFKANH	UAA	GGAGUACUUC	YFR049W|chrVI;248360;248522|248431,248458,AAG	YFR049W|chrVI;248360;248522|WT	3;0;2;1;2;3;2;299;5159;1539;0	0;2;4;0;0;1;1570;2900;1233;445;0	2.581,0.000,1.825,0.837,2.000,2.239,1.502,232.437,3966.899	0.000,1.788,3.650.0.000,0.000,0.746,1179.312,2254.409,948.088	33.579	9.709	0	0	0	0	0.992095	0.896701	-0.14585	0	0	4;4;0;2;0;1;789;0;2116;1103;99	7;4;1;2;2;4;1;1878;1083;296;0	3.978,3.235,0.000,1.720,0.000,0.910,681.714,0.000,1761.999	6.961,3.235,1.000.1.720,1.791,3.638,0.864,1717.128,901.817	23.63	6.341	3.885	0	0.164	0	0.952151	0.947626	-0.00687377	2.08e-33	2.73e-33
chrVI:249908-249878	chrVI;249919;249866	uORF	Scer	N	0.000333333	0.005375	0.011	30	11	12	CAGGAAUCC	AUC	CUUCAUCUUCCGCCGAAAACAACAUAA	0.63078	MLHLPPKTT	UAA	AAACCCACAC	YFR050C|chrVI;249919;249866|249908,249878,AAG	YFR050C|chrVI;249919;249866|WT	6;2;11;7;375;4740;3011;459;46;2652;6825	3;4;17;253;2447;3325;557;170;5;2165;4929	5.161,1.788,10.038,5.860,375.000,3537.714,2261.724,356.818,35.371	2.581,3.576,15.514.211.806,2447.000,2481.624,418.393,132.155,3.845	57.863	47.238	267.337	193.07	4.62	4.087	0.752687	0.641944	-0.229604	0	0	6;6;1;105;716;2565;1730;194;8;2864;5921	6;5;61;183;2240;2077;957;273;5;2183;5534	5.966,4.852,1.000,90.298,641.118,2333.061,1494.760,177.382,6.662	5.966,4.043,61.000.157.376,2005.731,1889.188,826.870,249.614,4.164	61.357	46.768	232.327	217.142	3.786	4.643	0.728093	0.660732	-0.140057	4.02e-136	7.15e-136
chrVI:79198-oORF	chrVI;79200;79161	oORF	Scer	N	NA	NA	NA	NA	2	NA	ND-too-cl	AUG	NA	NA	NA	NA	NA	YFL029C|chrVI;79200;79161|79198,AAG	YFL029C|chrVI;79200;79161|WT	0;1;66;277;1;1;1;1;0;208;406	0;39;44;0;0;0;0;0;0;89;64	0.000,0.894,60.231,231.898,1.000,0.746,0.751,0.777,0.000	0.000,34.867,40.154.0.000,0.000,0.000,0.000,0.000,0.000	4.538	1.942	15.903	2.507	3.504	1.291	0.36469	0.167707	-1.12073	1.01e-32	1.36e-32	2;0;48;292;9;0;1;0;1;283;498	1;214;33;0;0;0;0;0;0;144;136	1.989,0.000,48.000,251.114,8.059,0.000,0.864,0.000,0.833	0.994,173.051,33.000.0.000,0.000,0.000,0.000,0.000,0.000	6.063	3.085	19.54	5.336	3.223	1.73	0.364498	0.098238	-1.89156	1.39e-77	2.16e-77
chrVI:81944-81935	chrVI;81962;81912	uORF	Scer	N	0.0323333	0.0212727	0.012	9	18	23	AGCAAAUGA	AUG	ACAUAG	0.947607	MT	UAG	AACAAGCCAA	YFL027C|chrVI;81962;81912|81944,AAG	YFL027C|chrVI;81962;81912|WT	1;2;1;0;1;1;363;240;1502;836;1510	66;1319;80;1;1;0;48;2;0;867;551	0.860,1.788,0.913,0.000,1.000,0.746,272.669,186.572,1154.930	56.775,1179.219,73.007.0.837,1.000,0.000,36.055,1.555,0.000	18.24	18.917	59.147	21.583	3.243	1.141	0.955825	0.105447	-3.18023	0	0	4;1;0;0;0;73;206;329;1660;812;2160	136;842;116;30;18;0;1;46;3;822;318	3.978,0.809,0.000,0.000,0.000,66.399,177.989,300.817,1382.287	135.241,680.881,116.000.25.799,16.117,0.000,0.864,42.060,2.498	17.396	17.61	84.754	12.478	4.872	0.709	0.961569	0.137269	-2.80838	0	0
chrVI:9462-9471	chrVI;9395;9544	uORF	Scer	N	0.287333	0.218889	0.184	9	67	73	UAUAAAUGG	AUG	GGUUAG	1	MG	UAG	UUUCCUUCUU	YFL061W|chrVI;9395;9544|9462,AAG	YFL061W|chrVI;9395;9544|WT	327;1848;0;2;0;0;0;1;1;315;0	742;1144;1;1;0;2;3;0;2;690;0	281.293,1652.158,0.000,1.674,0.000,0.000,0.000,0.777,0.769	638.286,1022.765,0.913.0.837,0.000,1.493,2.253,0.000,1.538	6.873	15.055	0	0	0	0	0.0676305	0.0538549	-0.328597	8.08e-34	1.09e-33	1;2379;2;2;0;0;2;0;1;301;108	545;2623;126;1;0;0;1;1;1;995;0	0.994,1923.773,2.000,1.720,0.000,0.000,1.728,0.000,0.833	541.957,2121.083,126.000.0.860,0.000,0.000,0.864,0.914,0.833	6.448	21.316	4.238	0	0.657	0	0.0732515	0.0677145	-0.113395	1.61e-18	1.96e-18
chrVII:1004026-1004008	chrVII;1004035;1003962	uORF	Scer	N	0.000333333	0.003	0.00133333	18	9	46	CGAUAAUUU	AUU	UUCUUCAUUCAGUAA	0.734543	MFFIQ	UAA	CUCAAAUUGG	YGR255C|chrVII;1004035;1003962|1004026,1004008,AAG	YGR255C|chrVII;1004035;1003962|WT	31;18;13;3571;10690;5207;431;16;11;9441;2271	27;11;337;6692;10070;2969;109;174;14;6037;1748	26.667,16.092,11.864,2989.559,10690.000,3886.261,323.747,12.438,8.458	23.226,9.834,307.541.5602.388,10070.000,2215.923,81.876,135.265,10.765	205.99	131.72	88.956	68.47	0.432	0.52	0.56293	0.519261	-0.116495	8.54e-249	1.8e-248	33;25;618;4883;18747;2865;365;280;20;9911;3358	20;15;206;5327;8173;1055;1402;14;8;6632;1866	32.816,20.216,618.000,4199.273,16786.360,2605.934,315.369,256.015,16.654	19.888,12.130,206.000.4581.104,7318.233,959.602,1211.361,12.801,6.662	212.328	142.081	131.76	73.218	0.621	0.515	0.535253	0.524713	-0.028694	1.96e-50	2.78e-50
chrVII:1007361-1007334	chrVII;1007361;1007305	uORF	Scer	N	0.216333	0.106379	0.018	27	0	29	ND-too-cl	AUG	AGCCAAAGCCAUAAAGUAUCGUAG	0.664746	MSQSHKVS	UAG	GAAAGGAAAC	YGR257C|chrVII;1007361;1007305|1007361,AAG	YGR257C|chrVII;1007361;1007305|WT	3;5;3;33;4;86;638;2032;2564;1676;2780	6;5;1346;2203;499;163;1;2;5;1606;1181	2.581,4.470,2.738,27.627,4.000,64.186,479.236,1579.641,1971.531	5.161,4.470,1228.339.1844.301,499.000,121.656,0.751,1.555,3.845	36.568	35.041	108.893	46.26	2.978	1.32	0.926747	0.374419	-1.30752	0	0	3;3;1;2;6;182;1433;2105;2631;1381;2598	4;3;2306;2273;651;54;60;42;3;2470;358	2.983,2.426,1.000,1.720,5.372,165.543,1238.145,1924.683,2190.841	3.978,2.426,2306.000.1954.730,582.916,49.117,51.841,38.402,2.498	29.586	52.916	101.94	14.047	3.446	0.265	0.928815	0.346644	-1.42194	0	0
chrVII:1007361-1007334	chrVII;1007415;1007305	uORF	Scer	N	0.216333	0.106379	0.018	27	54	29	AUCGUAUGA	AUG	AGCCAAAGCCAUAAAGUAUCGUAG	0.664746	MSQSHKVS	UAG	GAAAGGAAAC	YGR257C|chrVII;1007415;1007305|1007361,1007334,AAG	YGR257C|chrVII;1007415;1007305|WT	920;19076;6652;504;14;11;36;17;25;13366;4491	1292;17403;1115;224;195;384;29;20;24;14185;1795	791.406,17054.420,6070.511,421.937,14.000,8.210,27.042,13.215,19.223	1111.409,15558.717,1017.532.187.528,195.000,286.600,21.783,15.548,18.454	291.629	309.498	175.914	70.311	0.603	0.227	0.12423	0.102263	-0.280722	1.75e-224	3.57e-224	488;25537;7662;133;242;16;33;1017;21;13773;3318	1611;25511;2792;431;458;357;28;29;19;18019;2102	485.275,20650.439,7662.000,114.377,216.691,14.553,28.513,929.882,17.487	1602.004,20629.414,2792.000.370.651,410.100,324.718,24.193,26.516,15.821	295.066	386.03	130.191	82.478	0.441	0.214	0.145487	0.107224	-0.440271	2.78e-268	5.98e-268
chrVII:1012956-1012941	chrVII;1012958;1012921	uORF	Scer	N	0.990667	0.996412	0.998333	15	2	20	ND-too-cl	AUG	GCGGACCCAUAA	0.634695	MADP	UAA	UUUUCAGAAG	YGR259C|chrVII;1012958;1012921|1012956,AAG	YGR259C|chrVII;1012958;1012921|WT	2;2;0;10;278;1;166;0;0;195;631	61;1078;28;0;7;0;0;0;2;532;223	1.720,1.788,0.000,8.372,278.000,0.746,124.692,0.000,0.000	52.474,963.759,25.552.0.000,7.000,0.000,0.000,0.000,1.538	4.255	11.608	24.716	8.735	5.809	0.752	0.626531	0.0824038	-2.9266	3.76e-188	7.28e-188	2;2;0;9;254;208;0;1;0;189;572	63;811;104;0;0;1;0;2;2;395;339	1.989,1.617,0.000,7.740,227.436,189.192,0.000,0.914,0.000	62.648,655.813,104.000.0.000,0.000,0.910,0.000,1.829,1.665	4.049	8.462	22.444	13.302	5.543	1.572	0.610669	0.0927873	-2.71839	1.16e-177	2.21e-177
chrVII:1017799-oORF	chrVII;1017800;1017759	oORF	Scer	N	NA	NA	NA	NA	1	NA	ND-too-cl	AUG	NA	NA	NA	NA	NA	YGR262C|chrVII;1017800;1017759|1017799,AAG	YGR262C|chrVII;1017800;1017759|WT	3;0;3;0;40;225;319;349;158;377;205	156;522;2;0;1;0;2;0;2;405;0	2.581,0.000,2.738,0.000,40.000,167.929,239.618,271.306,121.491	134.195,466.681,1.825.0.000,1.000,0.000,1.502,0.000,1.538	8.226	8.837	8.03	0	0.976	0	0.831916	0.0688802	-3.59428	1.76e-226	3.59e-226	0;0;0;0;0;98;491;254;268;408;401	139;636;8;0;1;0;2;0;2;395;63	0.000,0.000,0.000,0.000,0.000,89.138,424.235,232.242,223.164	138.224,514.300,8.000.0.000,0.895,0.000,1.728,0.000,1.665	8.741	8.462	15.734	2.472	1.8	0.292	0.886284	0.0662603	-3.74155	1.95e-256	4.15e-256
chrVII:1069119-1069101	chrVII;1069126;1068991	uORF	Scer	N	0.00266667	0.00125	0.00133333	18	7	110	GGGCAAUGA	AUG	AUAUUGAGUUGCUAG	0.745922	MILSC	UAG	ACGUUUGGUU	YGR287C|chrVII;1069126;1068991|1069119,AAG	YGR287C|chrVII;1069126;1068991|WT	6;3;5;4;0;3;561;3906;2920;2016;2379	409;5499;1;2;4;0;2;4;3;2386;260	5.161,2.682,4.563,3.349,0.000,2.239,421.397,3036.455,2245.269	351.831,4916.243,0.913.1.674,4.000,0.000,1.502,3.110,2.307	43.987	52.059	93.186	10.184	2.118	0.196	0.926317	0.0737814	-3.65018	0	0	5;5;1;3;0;6;5;2596;2550;1243;2337	63;5540;0;5;4;3;8;5;4;2366;603	4.972,4.043,1.000,2.580,0.000,5.457,4.320,2373.623,2123.392	62.648,4479.909,0.000.4.300,3.582,2.729,6.912,4.572,3.331	26.629	50.688	91.699	23.66	3.444	0.467	0.959082	0.0746546	-3.68335	0	0
chrVII:107562-107532	chrVII;107590;107504	uORF	Scer	Y	0.994667	0.739156	0.717333	30	28	28	CAGAGUUGA	UUG	AGAGAGAAAGAAGAUAUUCAACUAUAA	0.844227	MREKEDIQL	UAA	AAAUAAAUUA	YGL206C|chrVII;107590;107504|107562,107532,AAG	YGL206C|chrVII;107590;107504|WT	5;2;1;246;157;734;2597;145;226;1502;925	2;2;1;4;1;2;1947;553;199;1358;755	4.301,1.788,0.913,205.946,157.000,547.823,1950.746,112.720,173.778	1.720,1.788,0.913.3.349,1.000,1.493,1462.497,429.892,153.017	32.772	29.63	36.232	29.574	1.106	0.998	0.77668	0.852505	0.134389	5.6e-123	9.74e-123	3;8;15;45;189;2395;2456;122;4;2222;1676	4;39;2;2;1;203;1362;1505;3;946;688	2.983,6.469,15.000,38.699,169.234,2178.434,2122.041,111.549,3.331	3.978,31.537,2.000.1.720,0.895,184.644,1176.800,1376.080,2.498	47.603	20.267	65.763	26.996	1.381	1.332	0.761968	0.864523	0.182175	0	0
chrVII:1080242-1080272	chrVII;1080153;1080305	uORF	Scer	N	0.0433333	0.0477333	0.0103333	30	89	33	GAGGUAUGC	AUG	CGCUUUCAUUUCACUAUUUCUUGUUAA	0.760306	MRFHFTISC	UAA	GCUUACAUCA	YGR294W|chrVII;1080153;1080305|1080242,AAG	YGR294W|chrVII;1080153;1080305|WT	3;1811;0;0;0;2;2;1;0;1562;0	1455;2519;0;3;2;1;4;1;0;2019;0	2.581,1619.079,0.000,0.000,0.000,1.493,1.502,0.777,0.000	1251.625,2252.049,0.000.2.512,2.000,0.746,3.005,0.777,0.000	34.081	44.052	0	0	0	0	0.0783534	0.0540787	-0.534934	2.61e-92	4.24e-92	2;554;103;0;0;2;4;2;0;1509;138	1041;1168;169;3;0;5;3;2;3;1231;80	1.989,447.991,103.000,0.000,0.000,1.819,3.456,1.829,0.000	1035.187,944.501,169.000.2.580,0.000,4.548,2.592,1.829,2.498	32.328	26.372	5.415	3.139	0.168	0.119	0.112834	0.059185	-0.930897	1.2e-72	1.83e-72
chrVII:124104-oORF	chrVII;124212;124042	oORF	Scer	N	NA	NA	NA	NA	108	NA	GGCCAAUGG	AUG	NA	NA	NA	NA	NA	YGL199C|chrVII;124212;124042|124104,AAG	YGL199C|chrVII;124212;124042|WT	21381;1123;256;10;4;9;15;11;11;10590;1416	21630;1008;139;227;153;12;11;15;12;10609;518	18392.438,1003.990,233.622,8.372,4.000,6.717,11.267,8.551,8.458	18606.634,901.177,126.849.190.039,153.000,8.956,8.263,11.661,9.227	231.06	231.475	55.465	20.29	0.24	0.088	0.016674	0.0225534	0.435746	0.30302	0.314127	16779;2268;212;9;11;9;9;12;12;10136;788	19221;3026;233;109;23;12;16;11;8;10782;590	16685.309,1834.013,212.000,7.740,9.850,8.186,7.776,10.972,9.992	19113.674,2446.968,233.000.93.738,20.595,10.915,13.824,10.058,6.662	217.149	230.988	30.919	23.15	0.142	0.1	0.0189484	0.0212395	0.164674	0.00224	0.00241
chrVII:124115-124094	chrVII;124212;124042	uORF	Scer	N	0.003	0.0371304	0.0356667	21	97	52	CCAAUAUGG	AUG	GUAGGCCAAUGGAAGUAG	0.746416	MVGQWK	UAG	UAUCUGCGAG	YGL199C|chrVII;124212;124042|124115,AAG	YGL199C|chrVII;124212;124042|WT	14149;736;6;132;2;7;13;9;12;7469;170	21630;1008;139;227;153;12;11;15;12;10609;518	12171.302,658.002,5.476,110.507,2.000,5.224,9.765,6.996,9.227	18606.634,901.177,126.849.190.039,153.000,8.956,8.263,11.661,9.227	162.964	231.475	6.659	20.29	0.041	0.088	0.0176077	0.0225534	0.357139	0.175	0.182	17769;3127;2;56;7;14;11;6;8;8254;255	19221;3026;233;109;23;12;16;11;8;10782;590	17669.781,2528.642,2.000,48.159,6.268,12.734,9.504,5.486,6.662	19113.674,2446.968,233.000.93.738,20.595,10.915,13.824,10.058,6.662	176.83	230.988	10.006	23.15	0.057	0.1	0.018442	0.0212395	0.203752	0.76564	0.774389
chrVII:124174-124108	chrVII;124212;124042	uORF	Scer	N	0.575	0.357485	0.02	66	38	66	GCGCCAUGA	AUG	ACCACCAGUUUCACGAGCGACAGGACCCUCACAAUCCAGCGAUUUUGCUUUCCAAUAUGGUAG	0.579987	MTTSFTSDRTLTIQRFCFPIW	UAG	GCCAAUGGAA	YGL199C|chrVII;124212;124042|124174,AAG	YGL199C|chrVII;124212;124042|WT	15953;425;1;7;2;11;254;8;5;7690;445	21630;1008;139;227;153;12;11;15;12;10609;518	13723.145,379.961,0.913,5.860,2.000,8.210,190.793,6.219,3.845	18606.634,901.177,126.849.190.039,153.000,8.956,8.263,11.661,9.227	167.786	231.475	17.431	20.29	0.104	0.088	0.0226728	0.0225534	-0.00761645	7.41e-06	8.35e-06	14161;3718;3;137;195;10;9;3;7;8074;234	19221;3026;233;109;23;12;16;11;8;10782;590	14081.928,3006.553,3.000,117.817,174.606,9.096,7.776,2.743,5.829	19113.674,2446.968,233.000.93.738,20.595,10.915,13.824,10.058,6.662	172.973	230.988	9.182	23.15	0.053	0.1	0.0281896	0.0212395	-0.408415	1.63e-25	2.06e-25
chrVII:124589-124607	chrVII;124574;124697	uORF	Scer	Y	0.971667	0.859389	0.673	18	15	90	AUUACAUGG	AUG	GUGAAGGCGCUUUAG	0.548271	MVKAL	UAG	AGACUUUUCU	YGL197W|chrVII;124574;124697|124589,124607,AAG	YGL197W|chrVII;124574;124697|WT	18;10;80;363;6999;17447;3471;118;15;8810;536	5;5;202;675;4878;3079;1801;5;3;2232;423	15.484,8.940,73.007,303.895,6999.000,13021.625,2607.255,91.731,11.534	4.301,4.470,184.342.565.094,4878.000,2298.022,1352.828,3.887,2.307	192.223	48.699	20.995	16.569	0.109	0.34	0.670924	0.61522	-0.125047	3.83e-271	8.27e-271	16;17;11;851;8538;10699;4564;1096;24;7808;349	5;7;3;3022;4836;2647;8;5;7;3299;364	15.911,13.747,11.000,731.841,7645.060,9731.549,3943.402,1002.115,19.985	4.972,5.661,3.000.2598.854,4330.231,2407.647,6.912,4.572,5.829	167.275	70.676	13.694	14.283	0.082	0.202	0.675352	0.54217	-0.316894	0	0
chrVII:139982-139976	chrVII;140013;139961	uORF	Scer	N	0.412	0.37925	0.354667	6	31	15	AGUUCAUGU	AUG	UAA	1	M	UAA	UACAUCUGGA	YGL194C-A|chrVII;140013;139961|139982,AAG	YGL194C-A|chrVII;140013;139961|WT	6;1;2;2;0;2;967;728;744;735;0	3;3;992;2499;98;8;1;1;2;976;0	5.161,0.894,1.825,1.674,0.000,1.493,726.366,565.934,572.082	2.581,2.682,905.284.2092.105,98.000,5.971,0.751,0.777,1.538	16.037	21.295	0	0	0	0	0.89582	0.353679	-1.34077	0	0	1;0;1;2;1;7;148;645;912;1020;37	2;79;972;1716;129;2;3;2;2;1224;78	0.994,0.000,1.000,1.720,0.895,6.367,127.875,589.748,759.425	1.989,63.883,972.000.1475.723,115.509,1.819,2.592,1.829,1.665	21.852	26.222	1.452	3.061	0.066	0.117	0.953909	0.329491	-1.53361	0	0
chrVII:141802-oORF	chrVII;141806;141726	oORF	Scer	N	NA	NA	NA	NA	4	NA	ND-too-cl	AUG	NA	NA	NA	NA	NA	YGL194C|chrVII;141806;141726|141802,AAG	YGL194C|chrVII;141806;141726|WT	31;32;28;17;19;633;9791;16992;23480;11748;5631	84;11526;2363;33;56;12;15;21;13;8371;1450	26.667,28.609,25.552,14.232,19.000,472.442,7354.547,13209.281,18054.427	72.259,10304.532,2156.437.27.627,56.000,8.956,11.267,16.325,9.996	256.326	182.644	220.568	56.797	0.86	0.311	0.925286	0.110555	-3.06513	0	0	40;41;14;72;68;229;7987;14643;25096;13729;8546	186;13070;4071;192;276;13;11;9;25;9727;1708	39.777,33.155,14.000,61.918,60.888,208.293,6900.954,13388.660,20897.511	184.961,10569.027,4071.000.165.116,247.135,11.824,9.504,8.229,20.818	294.123	208.386	335.326	67.018	1.14	0.322	0.945642	0.128901	-2.87503	0	0
chrVII:142269-142260	chrVII;142406;142227	uORF	Scer	N	0.557333	0.589909	0.611667	9	137	33	AGAAAAUGU	AUG	UACUAG	0.875662	MY	UAG	UUUAUCGUUA	YGL193C|chrVII;142406;142227|142269,AAG	YGL193C|chrVII;142406;142227|WT	10872;5;1;3;3;3;3;6;5;2989;0	1981;1;0;1;1;1;1;1;0;1136;70	9352.350,4.470,0.913,2.512,3.000,2.239,2.253,4.664,3.845	1704.103,0.894,0.000.0.837,1.000,0.746,0.751,0.777,0.000	65.216	24.786	0	2.742	0	0.111	0.0102696	0.0107764	0.0694939	0.94208	0.946892	7167;665;81;1;4;3;7;2;2;2942;55	3256;1;0;0;0;2;0;1;1;835;0	7126.981,537.751,81.000,0.860,3.582,2.729,6.048,1.829,1.665	3237.819,0.809,0.000.0.000,0.000,1.819,0.000,0.914,0.833	63.028	17.889	2.158	0	0.034	0	0.0166047	0.0089766	-0.887354	2.38e-11	2.76e-11
chrVII:142295-142283	chrVII;142406;142227	uORF	Scer	N	0.137	0.278071	0.606	12	111	56	UUAGGAUGU	AUG	UCAUCAUAA	0.872787	MSS	UAA	UUCUGGAUCA	YGL193C|chrVII;142406;142227|142295,AAG	YGL193C|chrVII;142406;142227|WT	1623;243;0;0;1;0;0;1;2;785;0	1981;1;0;1;1;1;1;1;0;1136;70	1396.143,217.248,0.000,0.000,1.000,0.000,0.000,0.777,1.538	1704.103,0.894,0.000.0.837,1.000,0.746,0.751,0.777,0.000	17.128	24.786	0	2.742	0	0.111	0.0200356	0.0107764	-0.894692	2.93e-11	3.47e-11	948;161;1;1;1;0;0;2;2;1539;0	3256;1;0;0;0;2;0;1;1;835;0	942.707,130.192,1.000,0.860,0.895,0.000,0.000,1.829,1.665	3237.819,0.809,0.000.0.000,0.000,1.819,0.000,0.914,0.833	32.971	17.889	0	0	0	0	0.0204281	0.0089766	-1.18631	4.01e-10	4.6e-10
chrVII:142346-142283	chrVII;142406;142227	uORF	Scer	N	0.103	0.645185	0.606	63	60	56	CACUGAUGU	AUG	UACAGUGAAUACACAUCUUUGAGCUGUCCAGAAAGCGGUGCUCUUAGGAUGUCAUCAUAA	0.786897	MYSEYTSLSCPESGALRMSS	UAA	UUCUGGAUCA	YGL193C|chrVII;142406;142227|142346,AAG	YGL193C|chrVII;142406;142227|WT	16108;1036;2;3;4;12;10;9;5;6670;68	1981;1;0;1;1;1;1;1;0;1136;70	13856.480,926.210,1.825,2.512,4.000,8.956,7.512,6.996,3.845	1704.103,0.894,0.000.0.837,1.000,0.746,0.751,0.777,0.000	145.531	24.786	2.664	2.742	0.018	0.111	0.0145615	0.0107764	-0.434287	3.7e-05	4.14e-05	12499;2479;49;5;3;2;8;2;6;5786;313	3256;1;0;0;0;2;0;1;1;835;0	12429.208,2004.638,49.000,4.300,2.686,1.819,6.912,1.829,4.996	3237.819,0.809,0.000.0.000,0.000,1.819,0.000,0.914,0.833	123.956	17.889	12.281	0	0.099	0	0.0187109	0.0089766	-1.05964	1.55e-36	2.07e-36
chrVII:152796-oORF	chrVII;152844;152776	oORF	Scer	N	NA	NA	NA	NA	48	NA	AGGACUUGA	UUG	NA	NA	NA	NA	NA	YGL186C|chrVII;152844;152776|152796,152776,AAG	YGL186C|chrVII;152844;152776|WT	4;2;1;3;1;777;1541;1169;1232;801;290	18;2;0;0;2;304;64;1863;683;1137;411	3.441,1.788,0.913,2.512,1.000,579.916,1157.528,908.760,947.319	15.484,1.788,0.000.0.000,2.000,226.891,48.074,1448.263,525.178	17.477	24.808	11.359	16.099	0.65	0.649	0.868913	0.888905	0.0328181	5.79e-43	8.14e-43	3;15;2;1;2;1;248;1024;355;520;579	1;1;1;1;1;264;2399;1450;4;1002;293	2.983,12.130,2.000,0.860,1.791,0.910,214.278,936.283,295.610	0.994,0.809,1.000.0.860,0.895,240.128,2072.792,1325.791,3.331	11.14	21.466	22.719	11.497	2.039	0.536	0.918283	0.863275	-0.0891186	4.56e-206	9.04e-206
chrVII:174329-174323	chrVII;174381;174322	uORF	Scer	N	0.0593333	0.11775	0.243	6	52	1	UUUGUAUGU	AUG	UGA	1	M	UGA	GATGAGATCT	YGL175C|chrVII;174381;174322|174329,AAG	YGL175C|chrVII;174381;174322|WT	262;3400;654;60;5;2;2;1;3;2123;725	297;5480;1061;38;77;164;6;2;2;3583;1313	225.379,3039.685,596.830,50.231,5.000,1.493,1.502,0.777,2.307	255.486,4899.257,968.252.31.813,77.000,122.402,4.507,1.555,1.538	46.321	78.176	28.398	51.431	0.613	0.658	0.104547	0.120147	0.200645	0.00102	0.00112	192;3492;706;33;3;4;7;4;4;2087;1394	278;5417;456;46;198;4;8;4;5;3732;1718	190.928,2823.798,706.000,28.379,2.686,3.638,6.048,3.657,3.331	276.448,4380.445,456.000.39.559,177.292,3.638,6.912,3.657,4.164	44.711	79.953	54.697	67.41	1.223	0.843	0.106197	0.103508	-0.0370026	6.38e-07	7.09e-07
chrVII:174354-174345	chrVII;174381;174322	uORF	Scer	N	0.0196667	0.0150909	0.0176667	9	27	23	CAUCCAUGC	AUG	CUGUAA	0.632456	ML	UAA	GCCAUUAGGU	YGL175C|chrVII;174381;174322|174354,AAG	YGL175C|chrVII;174381;174322|WT	173;8;1;1491;3037;1711;173;6;6;3365;1532	297;5480;1061;38;77;164;6;2;2;3583;1313	148.819,7.152,0.913,1248.231,3037.000,1277.010,129.950,4.664,4.614	255.486,4899.257,968.252.31.813,77.000,122.402,4.507,1.555,1.538	73.42	78.176	60.009	51.431	0.817	0.658	0.544034	0.120147	-2.1789	0	0	129;26;5;2388;4959;395;219;6;8;2985;2708	278;5417;456;46;198;4;8;4;5;3732;1718	128.280,21.025,5.000,2053.628,4440.367,359.282,189.221,5.486,6.662	276.448,4380.445,456.000.39.559,177.292,3.638,6.912,3.657,4.164	63.949	79.953	106.256	67.41	1.662	0.843	0.505222	0.103508	-2.28717	0	0
chrVII:186021-oORF	chrVII;185999;186058	oORF	Scer	Y	NA	NA	NA	NA	22	NA	UUUUAAUGG	AUG	NA	NA	NA	NA	NA	YGL169W|chrVII;185999;186058|186021,186108,AAG	YGL169W|chrVII;185999;186058|WT	11;3;1;459;1152;1313;40;1;4;1195;365	417;1370;211;80;0;0;1;0;0;1028;123	9.462,2.682,0.913,384.264,1152.000,979.962,30.046,0.777,3.076	358.713,1224.814,192.555.66.974,0.000,0.000,0.751,0.000,0.000	26.073	22.43	14.297	4.818	0.548	0.215	0.589577	0.0926048	-2.67052	0	0	12;0;0;123;1416;908;45;2;2;934;82	94;1791;249;11;0;2;1;1;1;1072;132	11.933,0.000,0.000,105.777,1267.909,825.895,38.881,1.829,1.665	93.475,1448.288,249.000.9.460,0.000,1.819,0.864,0.914,0.833	20.01	22.966	3.217	5.179	0.161	0.226	0.600873	0.0950011	-2.66104	0	0
chrVII:198044-198080	chrVII;197989;198137	uORF	Scer	N	0.974	0.665944	0.955667	36	55	57	UCUUUAUGA	AUG	AAAGUAUUAGUGUACGCACUGGAUUUUUGGUAG	0.783316	MKVLVYALDFW	UAG	GUCUAUAAAA	YGL162W|chrVII;197989;198137|198044,AAG	YGL162W|chrVII;197989;198137|WT	0;2;1;1;765;597;449;4;3;1171;1442	3;543;2936;827;100;1;1;3;1;1238;800	0.000,1.788,0.913,0.837,765.000,445.573,337.268,3.110,2.307	2.581,485.456,2679.348.692.345,100.000,0.746,0.751,2.332,0.769	25.55	27.012	56.483	31.336	2.211	1.16	0.658232	0.258689	-1.34738	0	0	1;2;0;108;560;2232;1795;3;4;926;1307	3;1;2480;1575;163;3;3;1;3;997;199	0.994,1.617,0.000,92.878,501.433,2030.173,1550.922,2.743,3.331	2.983,0.809,2480.000.1354.466,145.953,2.729,2.592,0.914,2.498	19.838	21.359	51.284	7.808	2.585	0.366	0.730039	0.29918	-1.28696	0	0
chrVII:217508-oORF	chrVII;217468;217523	oORF	Scer	N	NA	NA	NA	NA	40	NA	AGUAUAUGA	AUG	NA	NA	NA	NA	NA	YGL151W|chrVII;217468;217523|217508,AAG	YGL151W|chrVII;217468;217523|WT	10;4;6;3;129;1345;2055;423;333;1067;2833	10;8;7;73;1859;6261;2395;483;6;3454;7596	8.602,3.576,5.476,2.512,129.000,1003.845,1543.621,328.833,256.053	8.602,7.152,6.388.61.114,1859.000,4672.917,1799.013,375.476,4.614	23.281	75.362	110.969	297.537	4.767	3.948	0.79775	0.70593	-0.176411	0	0	9;1;15;1;44;1115;281;498;177;1341;2066	10;6;6;194;3216;3080;2487;592;10;3546;5857	8.950,0.809,15.000,0.860,39.398,1014.177,242.791,455.341,147.388	9.944,4.852,6.000.166.836,2879.657,2801.493,2148.826,541.288,8.327	28.729	75.968	81.065	229.816	2.822	3.025	0.787475	0.693295	-0.183765	6.81e-144	1.23e-143
chrVII:236003-235988	chrVII;236007;235958	uORF	Scer	N	0.00466667	0.00270588	0.001	15	4	30	ND-too-cl	AUG	AAAAGUUCGUAG	0.69543	MKSS	UAG	AGCAGAACAA	YGL143C|chrVII;236007;235958|236003,AAG	YGL143C|chrVII;236007;235958|WT	7;2;3;4;1;6;978;1432;2455;1076;3413	2;2;91;1956;837;38;223;0;2;1534;3297	6.022,1.788,2.738,3.349,1.000,4.478,734.628,1113.212,1887.718	1.720,1.788,83.045.1637.518,837.000,28.361,167.507,0.000,1.538	23.477	33.47	133.688	129.144	5.694	3.859	0.930017	0.464399	-1.00189	0	0	4;4;0;1;4;3;246;1279;3304;1078;3289	4;7;184;1715;475;136;7;3;2;1278;2582	3.978,3.235,0.000,0.860,3.582,2.729,212.550,1169.439,2751.250	3.978,5.661,184.000.1474.863,425.322,123.702,6.048,2.743,1.665	23.095	27.379	129.053	101.312	5.588	3.7	0.969074	0.420233	-1.20542	0	0
chrVII:253891-oORF	chrVII;253914;253859	oORF	Scer	Y	NA	NA	NA	NA	23	NA	AAGUAAUGA	AUG	NA	NA	NA	NA	NA	YGL136C|chrVII;253914;253859|253891,253855,AAG	YGL136C|chrVII;253914;253859|WT	4;7;120;2;2;172;827;2846;1629;1294;154	707;2324;16;2;1;7;4;3;2;1335;0	3.441,6.258,109.510,1.674,2.000,128.373,621.204,2212.430,1252.584	608.178,2077.714,14.601.1.674,1.000,5.224,3.005,2.332,1.538	28.233	29.128	6.032	0	0.214	0	0.888933	0.0666972	-3.73638	0	0	6;2;1;1;133;96;423;1198;1781;1283;242	856;2798;8;28;5;1;2;3;2;1701;67	5.966,1.617,1.000,0.860,119.090,87.319,365.482,1095.378,1483.044	851.220,2262.597,8.000.24.079,4.477,0.910,1.728,2.743,1.665	27.486	36.441	9.496	2.629	0.345	0.072	0.928449	0.0600835	-3.94978	0	0
chrVII:254614-254626	chrVII;254576;254640	uORF	Scer	Y	0.999333	0.91425	0.808333	12	38	14	AUACUUUGG	UUG	GAAGACUAA	0.812359	MED	UAA	UUACAUAUCA	YGL135W|chrVII;254576;254640|254614,254626,AAG	YGL135W|chrVII;254576;254640|WT	4;5;1;4;33;1796;2443;548;480;1755;1067	9;8;1;59;2657;3023;791;614;7;3304;2274	3.441,4.470,0.913,3.349,33.000,1340.450,1835.069,426.006,369.085	7.742,7.152,0.913.49.393,2657.000,2256.226,594.163,477.313,5.382	38.292	72.089	41.795	89.073	1.091	1.236	0.808138	0.662719	-0.286205	0	0	4;3;0;3;209;1177;4448;627;423;1175;1734	12;11;8;382;3098;3305;1418;44;183;3914;2852	3.978,2.426,0.000,2.580,187.142,1070.570,3843.176,573.290,352.233	11.933,8.895,8.000.328.512,2773.998,3006.147,1225.185,40.231,152.385	25.173	83.852	68.038	111.906	2.703	1.335	0.824616	0.660552	-0.320052	0	0
chrVII:265936-oORF	chrVII;265945;265859	oORF	Scer	N	NA	NA	NA	NA	9	NA	AUAAAAUGC	AUG	NA	NA	NA	NA	NA	YGL131C|chrVII;265945;265859|265936,AAG	YGL131C|chrVII;265945;265859|WT	30;11;2186;20016;6529;3232;18;10;22;13844;7390	20248;3679;139;6;186;28;26;17;12;12240;662	25.807,9.834,1994.909,16756.935,6529.000,2412.214,13.521,7.774,16.916	17417.805,3289.118,126.849.5.023,186.000,20.898,19.530,13.215,9.227	302.058	267.061	289.468	25.931	0.958	0.097	0.445595	0.0279296	-3.99587	0	0	29;33;2095;16238;9673;269;558;19;27;11584;8541	21148;5098;108;10;9;16;13;17;13;12023;1446	28.838,26.685,2095.000,13964.325,8661.357,244.676,482.125,17.372,22.483	21029.914,4122.486,108.000.8.600,8.059,14.553,11.232,15.544,10.825	248.17	257.575	335.13	56.738	1.35	0.22	0.437756	0.0214045	-4.35414	0	0
chrVII:288426-288465	chrVII;288396;288511	uORF	Scer	N	0.000666667	0.000461538	0.00133333	39	30	46	CAGAUAUGU	AUG	UGCCAGACUGGCUCAGGUGGCAUAAACACAGAUUAA	0.707338	MCQTGSGGINTD	UAA	UAGUAUUGGC	YGL117W|chrVII;288396;288511|288426,AAG	YGL117W|chrVII;288396;288511|WT	1;2;2009;1235;1;1;0;1;1;1028;1343	474;156;1;0;0;1;0;4;0;2042;324	0.860,1.788,1833.382,1033.914,1.000,0.746,0.000,0.777,0.769	407.746,139.468,0.913.0.000,0.000,0.746,0.000,3.110,0.000	22.43	44.554	52.606	12.691	2.345	0.285	0.298219	0.0336688	-3.14689	4.8e-293	1.06e-292	0;2;663;369;2;2;1;1;1;1129;43	954;1468;0;2;1;1;2;2;2;843;179	0.000,1.617,663.000,317.332,1.791,1.819,0.864,0.914,0.833	948.673,1187.095,0.000.1.720,0.895,0.910,1.728,1.829,1.665	24.187	18.06	1.687	7.024	0.07	0.389	0.287244	0.0465507	-2.6254	0	0
chrVII:289725-oORF	chrVII;289667;289808	oORF	Scer	N	NA	NA	NA	NA	58	NA	GUCCAAUUG	AUU	NA	NA	NA	NA	NA	YGL116W|chrVII;289667;289808|289725,289809,AAG	YGL116W|chrVII;289667;289808|WT	7;4;1;5;3;2773;89;4051;981;2384;1442	2;3;1;2;3;991;3506;1303;1865;1780;903	6.022,3.576,0.913,4.186,3.000,2069.637,66.853,3149.176,754.318	1.720,2.682,0.913.1.674,3.000,739.636,2633.545,1012.929,1434.051	52.016	38.837	56.483	35.371	1.086	0.911	0.839837	0.866337	0.0448194	0.000739	0.000813	12;2;1;2;215;3038;5260;1225;1794;2892;1538	1;3;2;1;2;141;3417;148;1465;1076;1002	11.933,1.617,1.000,1.720,192.514,2763.291,4544.763,1120.065,1493.869	0.994,2.426,2.000.0.860,1.791,128.250,2952.368,135.322,1219.910	61.957	23.052	60.348	39.316	0.974	1.706	0.830589	0.882214	0.0869943	1.32e-131	2.31e-131
chrVII:291955-291982	chrVII;291911;292032	uORF	Scer	Y	0.0196667	0.0436296	0.00433333	27	44	50	GAAAAUUGU	UUG	UAUCAAUCUUUUAACGUUAGCUAA	0.856418	MYQSFNVS	UAA	ACAUCUUCUG	YGL115W|chrVII;291911;292032|291955,291982,AAG	YGL115W|chrVII;291911;292032|WT	215;18;11;12;10;21;7082;11322;17671;10491;3048	26;11;5;10;97;4722;6599;2470;2990;5265;4188	184.948,16.092,10.038,10.046,10.000,15.673,5319.671,8801.523,13587.725	22.366,9.834,4.563.8.372,97.000,3524.280,4956.864,1920.134,2299.094	228.9	114.875	119.391	164.045	0.522	1.428	0.925071	0.83244	-0.152216	0	0	16;24;11;11;201;1185;2813;12055;10483;10656;3701	22;11;4;86;390;4565;10585;3161;4706;6668;2068	15.911,19.408,11.000,9.460,179.979,1077.847,2430.498,11022.351,8729.224	21.877,8.895,4.000.73.958,349.212,4152.213,9145.687,2890.224,3918.700	228.289	142.852	145.219	81.144	0.636	0.568	0.931022	0.848514	-0.133876	0	0
chrVII:311995-311983	chrVII;312043;311933	uORF	Scer	N	0.983	0.986357	0.982	12	48	50	AGUAGAUGU	AUG	UUGAAUUAG	1	MLN	UAG	AUUAAACUGA	YGL102C|chrVII;312043;311933|311995,AAG	YGL102C|chrVII;312043;311933|WT	830;183;0;0;2;1;1;1;0;562;277	1616;1274;0;0;1;1;1;1;1;2347;261	713.985,163.607,0.000,0.000,2.000,0.746,0.751,0.777,0.000	1390.121,1138.988,0.000.0.000,1.000,0.746,0.751,0.777,0.769	12.262	51.209	10.85	10.223	0.885	0.2	0.0256155	0.040692	0.66773	5.46e-30	7.26e-30	159;1453;0;0;2;0;2;1;1;838;0	1552;1489;1;1;0;0;2;1;2;1449;81	158.112,1174.965,0.000,0.000,1.791,0.000,1.728,0.914,0.833	1543.334,1204.077,1.000.0.860,0.000,0.000,1.728,0.914,1.665	17.953	31.043	0	3.178	0	0.102	0.0670872	0.0376473	-0.83349	2.73e-116	4.64e-116
chrVII:312023-311978	chrVII;312043;311933	uORF	Scer	N	0.135	0.576617	0.321667	45	20	45	UGAAAAUGG	AUG	GGUGAUAGAAAUAAUACAGAAGUAGAUGUUGAAUUAGAUUAA	0.951683	MGDRNNTEVDVELD	UAA	ACUGAAGAUA	YGL102C|chrVII;312043;311933|312023,AAG	YGL102C|chrVII;312043;311933|WT	1;888;1719;1;102;1;3;3;0;1194;384	1616;1274;0;0;1;1;1;1;1;2347;261	0.860,793.894,1568.733,0.837,102.000,0.746,2.253,2.332,0.000	1390.121,1138.988,0.000.0.000,1.000,0.746,0.751,0.777,0.769	26.052	51.209	15.041	10.223	0.577	0.2	0.205725	0.040692	-2.3379	0	0	5;2925;1057;56;78;1;4;0;0;1040;368	1552;1489;1;1;0;0;2;1;2;1449;81	4.972,2365.295,1057.000,48.159,69.842,0.910,3.456,0.000,0.000	1543.334,1204.077,1.000.0.860,0.000,0.000,1.728,0.914,1.665	22.28	31.043	14.439	3.178	0.648	0.102	0.135664	0.0376473	-1.84942	0	0
chrVII:343266-oORF	chrVII;343246;343318	oORF	Scer	N	NA	NA	NA	NA	20	NA	UGUCAAUGC	AUG	NA	NA	NA	NA	NA	YGL090W|chrVII;343246;343318|343266,AAG	YGL090W|chrVII;343246;343318|WT	2670;20034;455;336;131;350;35;25;15;12617;0	4982;16577;315;109;158;104;494;20;16;14515;0	2296.797,17910.896,415.226,281.291,131.000,261.224,26.290,19.435,11.534	4285.633,14820.252,287.464.91.252,158.000,77.621,371.070,15.548,12.303	275.287	316.699	0	0	0	0	0.0893848	0.0870896	-0.0375289	3.36e-72	5.22e-72	2326;24125;414;145;237;123;28;19;20;14408;24	7034;19269;639;439;220;209;34;15;23;14304;0	2313.012,19508.628,414.000,124.697,212.214,111.878,24.193,17.372,16.654	6994.723,15581.834,639.000.377.530,196.991,190.101,29.377,13.715,19.152	308.67	306.442	0.942	0	0.003	0	0.0795144	0.0734365	-0.114718	4.21e-205	8.35e-205
chrVII:343295-oORF	chrVII;343246;343318	oORF	Scer	Y	NA	NA	NA	NA	49	NA	AUUGGAUGA	AUG	NA	NA	NA	NA	NA	YGL090W|chrVII;343246;343318|343295,343331,AAG	YGL090W|chrVII;343246;343318|WT	3217;22327;961;281;212;26;28;29;19;13554;0	4982;16577;315;109;158;104;494;20;16;14515;0	2767.339,19960.896,876.994,235.247,212.000,19.405,21.032,22.544,14.610	4285.633,14820.252,287.464.91.252,158.000,77.621,371.070,15.548,12.303	295.731	316.699	0	0	0	0	0.0844726	0.0870896	0.0440171	1.25e-70	1.93e-70	4416;21153;328;173;379;22;23;23;27;13395;284	7034;19269;639;439;220;209;34;15;23;14304;0	4391.342,17105.327,328.000,148.776,339.363,20.011,19.873,21.030,22.483	6994.723,15581.834,639.000.377.530,196.991,190.101,29.377,13.715,19.152	286.968	306.442	11.144	0	0.039	0	0.073792	0.0734365	-0.00696531	5.91e-44	8.17e-44
chrVII:343307-343313	chrVII;343246;343318	uORF	Scer	N	0	0	0	6	61	6	UAUUUAUGU	AUG	UAG	1	M	UAG	GGTGCTATGA	YGL090W|chrVII;343246;343318|343307,AAG	YGL090W|chrVII;343246;343318|WT	781;14117;2197;98;9;189;23;12;19;9214;0	4982;16577;315;109;158;104;494;20;16;14515;0	671.835,12620.951,2004.948,82.043,9.000,141.061,17.277,9.329,14.610	4285.633,14820.252,287.464.91.252,158.000,77.621,371.070,15.548,12.303	201.038	316.699	0	0	0	0	0.105217	0.0870896	-0.2728	0	0	475;15735;2090;476;13;14;24;11;17;11378;18	7034;19269;639;439;220;209;34;15;23;14304;0	472.348,12724.073,2090.000,409.350,11.640,12.734,20.737,10.058,14.156	6994.723,15581.834,639.000.377.530,196.991,190.101,29.377,13.715,19.152	243.757	306.442	0.706	0	0.003	0	0.10306	0.0734365	-0.48892	0	0
chrVII:376045-376066	chrVII;376012;376100	uORF	Scer	N	0.000333333	0.000380952	0.000666667	21	33	34	UAAAGAUUG	AUU	GUACCUUUUUGCUCCUGA	0.733846	MVPFCS	UGA	UUUUUUUUUG	YGL067W|chrVII;376012;376100|376045,376066,AAG	YGL067W|chrVII;376012;376100|WT	51;54;105;29;763;9579;47025;25147;9480;21386;15225	85;71;50;39;371;5060;39885;29131;18947;26416;13376	43.871,48.277,95.821,24.278,763.000,7149.317,35323.009,19548.834,7289.436	73.119,63.476,45.629.32.650,371.000,3776.547,29959.770,22645.925,14568.877	466.615	576.363	596.367	523.941	1.278	0.909	0.847481	0.873981	0.0444197	0	0	61;71;63;27;940;12012;34104;15157;11843;20328;13092	76;88;28;49;320;4812;37179;30766;23831;24184;17211	60.659,57.414,63.000,23.219,841.691,10925.822,29466.651,13858.630,9861.700	75.576,71.161,28.000.42.139,286.533,4376.878,32123.523,28130.540,19844.142	435.497	518.106	513.701	675.321	1.18	1.303	0.855216	0.897457	0.0695538	0	0
chrVII:392201-392213	chrVII;392187;392222	uORF	Scer	N	0.00966667	0.066	0.108667	12	14	10	GGUCAAUGG	AUG	GAUAAAUAG	1	MDK	UAG	TTCTGTAATT	YGL059W|chrVII;392187;392222|392201,AAG	YGL059W|chrVII;392187;392222|WT	0;0;1;0;0;0;43;52;74;86;327	1;0;0;28;223;217;115;0;1;208;258	0.000,0.000,0.913,0.000,0.000,0.000,32.300,40.424,56.901	0.860,0.000,0.000.23.441,223.000,161.959,86.383,0.000,0.769	1.876	4.538	12.809	10.106	6.828	2.227	0.917694	0.643949	-0.511067	8.38e-62	1.26e-61	0;0;1;1;0;52;96;66;183;88;212	1;0;0;0;483;401;49;1;0;243;497	0.000,0.000,1.000,0.860,0.000,47.298,82.946,60.346,152.385	0.994,0.000,0.000.0.000,432.486,364.740,42.337,0.914,0.000	1.885	5.206	8.318	19.501	4.413	3.746	0.90296	0.631136	-0.516712	7.65e-131	1.34e-130
chrVII:397641-oORF	chrVII;397716;397618	oORF	Scer	N	NA	NA	NA	NA	75	NA	ACAUCAUCU	AUC	NA	NA	NA	NA	NA	YGL056C|chrVII;397716;397618|397641,397618,AAG	YGL056C|chrVII;397716;397618|WT	70;65;59;1124;242;5542;55107;31601;16131;26102;26977	66;202;30;357;14672;41812;18808;2409;3603;26943;24135	60.216,58.112,53.842,940.987,242.000,4136.290,41393.834,24566.060,12403.576	56.775,180.593,27.378.298.872,14672.000,31206.521,14127.701,1872.714,2770.447	569.512	587.861	1056.7	945.374	1.855	1.608	0.859844	0.714638	-0.266862	0	0	96;73;48;512;365;5074;36830;29581;21069;26850;23084	76;62;69;341;13069;28781;22273;4292;977;27748;24061	95.464,59.031,48.000,440.309,326.827,4615.187,31821.979,27047.049,17544.217	75.576,50.136,69.000.293.253,11702.189,26178.495,19244.391,3924.341,813.551	575.221	594.459	905.765	944.1	1.575	1.588	0.890886	0.73259	-0.282235	0	0
chrVII:403392-403416	chrVII;403374;403436	uORF	Scer	N	0.186333	0.1905	0.338	24	18	20	CAUUUAUGA	AUG	AUUUUUUGUAAUAGGAUAUAA	0.830694	MIFCNRI	UAA	AUAUAUACGG	YGL052W|chrVII;403374;403436|403392,AAG	YGL052W|chrVII;403374;403436|WT	3;2;0;2;181;949;603;459;494;1191;1853	4;137;1400;940;457;44;4;1;3;1568;1310	2.581,1.788,0.000,1.674,181.000,708.289,452.946,356.818,379.850	3.441,122.481,1277.618.786.946,457.000,32.840,3.005,0.777,2.307	25.986	34.212	72.582	51.313	2.793	1.5	0.804508	0.339386	-1.24518	0	0	4;6;1;2;123;1329;439;367;1;1007;1299	1;4;1941;1883;77;4;3;2;1;1319;2266	3.978,4.852,1.000,1.720,110.136,1208.826,379.306,335.562,0.833	0.994,3.235,1941.000.1619.339,68.947,3.638,2.592,1.829,0.833	21.573	28.258	50.97	88.913	2.363	3.146	0.755645	0.308779	-1.29113	0	0
chrVII:433125-433107	chrVII;433167;433062	uORF	Scer	N	0.001	0.0163	0.0463333	18	42	45	CAUUUAUUC	AUU	CUAGCUCGCUUGUAA	0.576059	MLARL	UAA	CUACACGAGA	YGL035C|chrVII;433167;433062|433125,433107,AAG	YGL035C|chrVII;433167;433062|WT	95;424;29;1539;24490;31636;13820;430;847;23903;25219	74;41;78;174;10541;45065;26756;4463;40;23963;34704	81.721,379.067,26.465,1288.415,24490.000,23611.630,10380.946,334.274,651.282	63.657,36.655,71.182.145.669,10541.000,33634.408,20097.872,3469.457,30.757	521.533	522.842	987.834	1359.36	1.894	2.6	0.659762	0.728965	0.143903	0	0	61;63;400;3047;31109;22271;8245;2404;46;24814;25134	54;60;190;165;10895;29710;13368;893;914;24824;27318	60.659,50.945,400.000,2620.353,27855.489,20257.158,7123.872,2198.070,38.304	53.698,48.519,190.000.141.896,9755.555,27023.491,11550.264,816.504,761.090	531.603	531.817	986.202	1071.9	1.855	2.016	0.639101	0.710535	0.152862	0	0
chrVII:452350-oORF	chrVII;452338;452403	oORF	Scer	N	NA	NA	NA	NA	12	NA	CCGCAAUCG	AUC	NA	NA	NA	NA	NA	YGL022W|chrVII;452338;452403|452350,452403,AAG	YGL022W|chrVII;452338;452403|WT	43;27;19;16;172;2574;12226;9968;7171;10370;10059	12;20;14;12;833;6014;12037;3119;1369;6591;6269	36.990,24.139,17.339,13.395,172.000,1921.113,9183.607,7748.947,5513.982	10.323,17.880,12.776.10.046,833.000,4488.568,9041.639,2424.656,1052.662	226.26	143.807	394.013	245.558	1.741	1.708	0.873205	0.803767	-0.119544	0	0	28;30;21;10;204;2842;18257;14092;4743;10845;16499	58;14;6;68;1462;6505;8778;2965;523;5762;8185	27.844,24.259,21.000,8.600,182.665,2585.014,15774.474,12884.859,3949.510	57.676,11.321,6.000.58.479,1309.098,5916.789,7584.397,2711.014,435.504	232.338	123.442	647.384	321.161	2.786	2.602	0.877624	0.787888	-0.155612	0	0
chrVII:454737-454758	chrVII;454722;454784	uORF	Scer	N	0.737	0.317905	0.00866667	21	15	26	UAUCAAUGU	AUG	UUUAUUUUUAUUUAUUAA	1	MFIFIY	UAA	GUAUUUGAUG	YGL021W|chrVII;454722;454784|454737,AAG	YGL021W|chrVII;454722;454784|WT	2;438;804;1;2;1;1;2;0;618;183	253;2446;232;0;1;109;3;6;3;1682;357	1.720,391.583,733.718,0.837,2.000,0.746,0.751,1.555,0.000	217.637,2186.785,211.720.0.000,1.000,81.353,2.253,4.664,2.307	13.484	36.699	7.168	13.984	0.532	0.381	0.18985	0.106995	-0.827321	1.19e-156	2.19e-156	1;491;174;17;0;1;1;2;1;413;461	164;2298;74;0;3;1;3;1;1;1299;883	0.994,397.046,174.000,14.620,0.000,0.910,0.864,1.829,0.833	163.084,1858.273,74.000.0.000,2.686,0.910,2.592,0.914,0.833	8.848	27.829	18.089	34.647	2.044	1.245	0.135054	0.0753422	-0.842009	1.36e-36	1.82e-36
chrVII:454765-454771	chrVII;454722;454784	uORF	Scer	N	0.00133333	0.0005	0.000333333	6	43	13	AUUUGAUGU	AUG	UGA	1	M	UGA	AGUAGUUUUU	YGL021W|chrVII;454722;454784|454765,AAG	YGL021W|chrVII;454722;454784|WT	3;139;712;202;1;146;1;1;0;792;593	253;2446;232;0;1;109;3;6;3;1682;357	2.581,124.269,649.760,169.110,1.000,108.968,0.751,0.777,0.000	217.637,2186.785,211.720.0.000,1.000,81.353,2.253,4.664,2.307	17.28	36.699	23.228	13.984	1.344	0.381	0.297824	0.106995	-1.47692	2.07e-294	4.58e-294	2;182;973;389;2;0;0;0;2;499;965	164;2298;74;0;3;1;3;1;1;1299;883	1.989,147.174,973.000,334.532,1.791,0.000,0.000,0.000,1.665	163.084,1858.273,74.000.0.000,2.686,0.910,2.592,0.914,0.833	10.69	27.829	37.864	34.647	3.542	1.245	0.255097	0.0753422	-1.75951	0	0
chrVII:478700-478655	chrVII;478723;478652	uORF	Scer	N	0.006	0.298191	0.470333	45	23	3	UGAAAUUGA	UUG	ACAGUUUUUGUCGCUAUCGAUUUUUAUUAUUUGCUGUUUUAA	0.851862	MTVFVAIDFYYLLF	UAA	ATCATGAGAT	YGL009C|chrVII;478723;478652|478700,478655,AAG	YGL009C|chrVII;478723;478652|WT	7;5;24;3;4;1958;6062;3887;629;2093;8571	4;4;1;1;0;314;2740;1529;617;1382;5296	6.022,4.470,21.902,2.512,4.000,1461.360,4553.495,3021.685,483.656	3.441,3.576,0.913.0.837,0.000,234.355,2058.161,1188.618,474.429	45.667	30.153	335.728	207.446	7.352	6.88	0.837068	0.8597	0.0384875	1.36e-31	1.81e-31	6;10;3;8;10;241;2645;3094;3542;1727;5932	1;5;3;3;81;290;1019;506;516;1307;4733	5.966,8.086,3.000,6.880,8.954,219.208,2285.342,2828.964,2949.434	0.994,4.043,3.000.2.580,72.529,263.777,880.440,462.655,429.675	36.998	28.001	232.758	185.712	6.291	6.632	0.921239	0.861582	-0.0965871	5.72e-112	9.61e-112
chrVII:483043-oORF	chrVII;483193;483027	oORF	Scer	N	NA	NA	NA	NA	150	NA	GGUCGAUGG	AUG	NA	NA	NA	NA	NA	YGL007C-A|chrVII;483193;483027|483043,AAG	YGL007C-A|chrVII;483193;483027|WT	84;0;0;0;0;0;0;0;1;99;0	525;1;0;0;1;1;0;0;1;229;0	72.259,0.000,0.000,0.000,0.000,0.000,0.000,0.000,0.769	451.617,0.894,0.000.0.000,1.000,0.746,0.000,0.000,0.769	2.16	4.996	0	0	0	0	0.0218736	0.0147053	-0.572849	0.97068	0.972567	42;59;0;0;0;0;0;0;0;100;2	1074;1;1;0;2;0;1;0;0;194;0	41.765,47.710,0.000,0.000,0.000,0.000,0.000,0.000,0.000	1068.003,0.809,1.000.0.000,1.791,0.000,0.864,0.000,0.000	2.142	4.156	0.078	0	0.036	0	0.0417989	0.010203	-2.03447	1.16e-16	1.4e-16
chrVII:483067-oORF	chrVII;483193;483027	oORF	Scer	N	NA	NA	NA	NA	126	NA	CAAUUAUGA	AUG	NA	NA	NA	NA	NA	YGL007C-A|chrVII;483193;483027|483067,AAG	YGL007C-A|chrVII;483193;483027|WT	2037;564;0;0;2;1;1;0;0;1138;0	525;1;0;0;1;1;0;0;1;229;0	1752.275,504.230,0.000,0.000,2.000,0.746,0.751,0.000,0.000	451.617,0.894,0.000.0.000,1.000,0.746,0.000,0.000,0.769	24.83	4.996	0	0	0	0	0.0249968	0.0147053	-0.765405	7.25e-13	8.72e-13	1677;96;0;0;0;4;1;0;1;899;10	1074;1;1;0;2;0;1;0;0;194;0	1667.636,77.630,0.000,0.000,0.000,3.638,0.864,0.000,0.833	1068.003,0.809,1.000.0.000,1.791,0.000,0.864,0.000,0.000	19.26	4.156	0.392	0	0.02	0	0.0133997	0.010203	-0.393198	0.059436	0.0620967
chrVII:483232-oORF	chrVII;483131;483259	oORF	Scer	N	NA	NA	NA	NA	101	NA	AAGCAAUGG	AUG	NA	NA	NA	NA	NA	YGL007W|chrVII;483131;483259|483232,AAG	YGL007W|chrVII;483131;483259|WT	1;0;0;365;238;0;0;1;1;290;62	1233;251;0;0;0;0;1;0;0;391;0	0.860,0.000,0.000,305.570,238.000,0.000,0.000,0.777,0.769	1060.656,224.400,0.000.0.000,0.000,0.000,0.751,0.000,0.000	6.327	8.531	2.429	0	0.384	0	0.461385	0.0209659	-4.45986	9.41e-251	1.99e-250	0;0;18;579;168;0;0;0;2;175;653	460;238;0;1;0;1;1;0;1;465;26	0.000,0.000,18.000,497.927,150.430,0.000,0.000,0.000,1.665	457.431,192.458,0.000.0.860,0.000,0.910,0.864,0.000,0.833	3.749	9.962	25.622	1.02	6.834	0.102	0.416311	0.0310675	-3.74419	1.79e-213	3.59e-213
chrVII:494277-494196	chrVII;494277;494174	uORF	Scer	N	0.0756667	0.0345422	0.00433333	81	0	22	ND-too-cl	AUG	GAUUUACAAUACCUUAGACUUGGCCAUCUCAAACUUGGUUCAUCCUCUAACUCCGAUUUUUGUCACCCUUCCUUCUAG	0.725273	MDLQYLRLGHLKLGSSSNSDFCHPSF	UAG	UCUUCAUCCU	YGL003C|chrVII;494277;494174|494277,AAG	YGL003C|chrVII;494277;494174|WT	25;163;23709;11958;757;31;32;14;32;13079;7984	12384;12029;189;154;268;318;21;26;21;13015;461	21.506,145.726,21636.463,10010.963,757.000,23.137,24.037,10.883,24.606	10653.007,10754.226,172.478.128.925,268.000,237.340,15.774,20.212,16.147	285.367	283.97	312.735	18.057	1.096	0.064	0.297672	0.0615107	-2.27481	0	0	125;85;20253;9437;1054;436;31;19;29;13776;10340	10332;20062;302;129;408;12;34;19;27;14606;2495	124.302,68.735,20253.000,8115.614,943.768,396.575,26.785,17.372,24.148	10274.308,16223.092,302.000.110.937,365.330,10.915,29.377,17.372,22.483	295.13	312.912	405.719	97.898	1.375	0.313	0.292975	0.0595002	-2.29981	0	0
chrVII:494406-494451	chrVII;494405;494516	uORF	Scer	N	0.0396667	0.00162222	0.000333333	45	1	65	ND-too-cl	AUG	GGGUGUAUAGUUAAAAUCUCUACUGAUAGACUUUAUUGGUGA	0.798047	MGCIVKISTDRLYW	UGA	GGUUGUGAAC	YGL002W|chrVII;494405;494516|494406,AAG	YGL002W|chrVII;494405;494516|WT	411;9660;16866;567;5;11;19;11;9;9430;8681	11411;5919;79;478;171;17;16;12;11;10451;1300	353.552,8636.281,15391.648,474.679,5.000,8.210,14.272,8.551,6.920	9816.010,5291.734,72.094.400.171,171.000,12.688,12.018,9.329,8.458	205.75	228.027	340.037	50.921	1.653	0.223	0.187395	0.0502392	-1.8992	0	0	15;4929;7739;709;9;14;14;4;12;10030;6378	12460;7211;543;317;9;16;17;12;15;8653;2340	14.916,3985.825,7739.000,609.725,8.059,12.734,12.096,3.657,9.992	12390.426,5831.159,543.000.272.613,8.059,14.553,14.688,10.972,12.491	214.878	185.378	250.258	91.816	1.165	0.495	0.193454	0.0418674	-2.20809	0	0
chrVII:502822-502843	chrVII;502821;502937	uORF	Scer	N	0.996667	0.985333	0.989333	21	1	94	ND-too-cl	AUG	UUGAAAUUUACGGUAUAA	0.780229	MLKFTV	UAA	GAGAAGCUCA	YGR004W|chrVII;502821;502937|502822,AAG	YGR004W|chrVII;502821;502937|WT	6;2410;12089;582;5;6;9;5;7;5928;4334	3633;3462;5;5;118;5;5;8;5;5363;473	5.161,2154.600,11032.233,487.237,5.000,4.478,6.760,3.887,5.382	3125.192,3095.114,4.563.4.186,118.000,3.732,3.756,6.219,3.845	129.341	117.014	169.764	18.528	1.313	0.158	0.225265	0.0545925	-2.04485	0	0	8;1446;9407;603;4;94;10;10;1433;5535;3654	4055;6213;3;4;5;6;7;5;4;4515;728	7.955,1169.305,9407.000,518.567,3.582,85.500,8.640,9.143,1193.263	4032.358,5024.129,3.000.3.440,4.477,5.457,6.048,4.572,3.331	118.579	96.727	143.375	28.565	1.209	0.295	0.305863	0.0456308	-2.7448	0	0
chrVII:511478-511508	chrVII;511450;511544	uORF	Scer	N	0.003	0.1465	0.235667	30	28	36	CUCCACUGU	CUG	UUAAGUAGAGAGAGAGAGAGAGUUUAA	0.785036	MLSRERERV	UAA	AGUGGAGAAG	YGR010W|chrVII;511450;511544|511478,511508,AAG	YGR010W|chrVII;511450;511544|WT	118;25;120;73;399;1411;16516;27827;14189;16579;10608	44;162;97;158;268;4677;33161;15006;8626;13887;11761	101.506,22.351,109.510,61.114,399.000,1053.104,12406.057,21632.219,10910.318	37.850,144.832,88.521.132.274,268.000,3490.694,24909.012,11665.400,6632.772	361.732	302.996	415.518	460.681	1.149	1.52	0.888384	0.853213	-0.0582762	0	0	54;563;63;21;140;847;14083;14693;26976;16952;13132	45;47;28;27;417;6394;22466;9308;8012;15589;12444	53.698,455.269,63.000,18.060,125.358,770.411,12168.040,13434.377,22462.993	44.749,38.006,28.000.23.219,373.388,5815.826,19411.148,8510.663,6671.615	363.171	333.971	515.27	488.275	1.419	1.462	0.925093	0.8611	-0.103418	0	0
chrVII:595933-595873	chrVII;595940;595837	uORF	Scer	N	0.004	0.00291936	0.000333333	60	7	36	CAGGUAUGA	AUG	AGCCAUAAAGCUGCAAGCCUCUACGGAAAACGAUACAUCACAACCAAGGAAAGAUAG	0.651085	MSHKAASLYGKRYITTKER	UAG	ACAGUUUAUA	YGR053C|chrVII;595940;595837|595933,AAG	YGR053C|chrVII;595940;595837|WT	12;11;2250;11048;2091;1049;17;14;9;5728;805	720;9892;237;6;3;8;11;6;12;6667;298	10.323,9.834,2053.315,9249.132,2091.000,782.925,12.770,10.883,6.920	619.361,8843.695,216.282.5.023,3.000,5.971,8.263,4.664,9.227	124.978	145.465	31.532	11.673	0.252	0.08	0.410999	0.0785788	-2.38692	0	0	122;33;1181;6739;1435;704;14;8;12;6820;53	755;9053;8;207;10;30;9;9;9;6579;44	121.319,26.685,1181.000,5795.393,1284.922,640.341,12.096,7.315,9.992	750.784,7320.689,8.000.178.015,8.954,27.287,7.776,8.229,7.494	146.108	140.945	2.08	1.726	0.014	0.012	0.404794	0.0777476	-2.38032	0	0
chrVII:605519-605510	chrVII;605574;605501	uORF	Scer	N	0.975333	0.981182	0.993333	9	55	9	GGUUGAUGA	AUG	AAAUAG	1	MK	UAG	ATGCATAGAA	YGR057C|chrVII;605574;605501|605519,AAG	YGR057C|chrVII;605574;605501|WT	13;18;7084;5974;177;5;110;14;7;6219;6483	8;338;6945;2271;242;10;14;9;4;5045;3357	11.183,16.092,6464.748,5001.295,177.000,3.732,82.627,10.883,5.382	6.882,302.180,6337.899.1901.229,242.000,7.464,10.516,6.996,3.076	135.691	110.075	253.941	131.494	1.871	1.195	0.316336	0.281218	-0.169769	1.16e-149	2.1e-149	185;209;6887;4416;431;10;9;5;8;7765;4463	13;107;9304;2814;8;370;10;7;10;4355;3777	183.967,169.007,6887.000,3797.664,385.924,9.096,7.776,4.572,6.662	12.927,86.525,9304.000.2419.979,7.163,336.543,8.640,6.400,8.327	166.354	93.299	175.118	148.201	1.053	1.588	0.291313	0.279556	-0.0594289	3e-54	4.33e-54
chrVII:605526-605502	chrVII;605574;605501	uORF	Scer	Y	0.990667	0.986731	0.997333	24	48	1	UUUAAAUGG	AUG	GUUGAUGAAAUAGAUGCAUAG	0.90231	MVDEIDA	UAG	AATGAGATCT	YGR057C|chrVII;605574;605501|605526,605502,AAG	YGR057C|chrVII;605574;605501|WT	19;8;4;7;227;3310;3295;5051;1175;4214;7556	8;338;6945;2271;242;10;14;9;4;5045;3357	16.344,7.152,3.650,5.860,227.000,2470.429,2475.052,3926.558,903.490	6.882,302.180,6337.899.1901.229,242.000,7.464,10.516,6.996,3.076	91.944	110.075	295.97	131.494	3.219	1.195	0.830932	0.281218	-1.56304	0	0	9;6;4;4;231;1621;5076;2441;2524;4982;5652	13;107;9304;2814;8;370;10;7;10;4355;3777	8.950,4.852,4.000,3.440,206.841,1474.422,4385.782,2231.900,2101.742	12.927,86.525,9304.000.2419.979,7.163,336.543,8.640,6.400,8.327	106.732	93.299	221.772	148.201	2.078	1.588	0.865491	0.279556	-1.63038	0	0
[truncated: 1,537 more rows]
[truncated: 18 more columns]

## Sheet: b
uORF	UTR
chrI:158931-oORF	chrI;158863;158965
chrI:158931-oORF	chrI;158863;158965
chrII:338332-338254	chrII;338336;338199
chrII:338332-338254	chrII;338336;338199
chrII:454535-oORF	chrII;454585;454530
chrII:454535-oORF	chrII;454585;454530
chrII:620817-620832	chrII;620816;620871
chrII:620817-620832	chrII;620816;620871
[truncated: 66 more rows]

## Sheet: c
uORF	UTR	Type	Species	Spealman_2018	Start_Cons	uORF_Cons	Stop_Cons	Length	Cap_Dist(nt)	CDS_Dist(nt)	Kozak	StartCodon	uORF_CDS	uORF_CAI	uORF_Pep	StopCodon	StopDown	MutName	RefName	MutRaw1	RefRaw1	MutNorm1	RefNorm1	MutDNArpm1	RefDNArpm1	MutRNArpm1	RefRNArpm1	MutRNA1	RefRNA1	MutYFP1	RefYFP1	Log2diff1	RawP1	AdjP1	MutRaw2	RefRaw2	MutNorm2	RefNorm2	MutDNArpm2	RefDNArpm2	MutRNArpm2	RefRNArpm2	MutRNA2	RefRNA2	MutYFP2	RefYFP2	Log2diff2	RawP2	AdjP2
[truncated: 417 more rows]
[truncated: 17 more columns]

[truncated: 8 more sheets: d, e, f, g, h, i, j, k]
