# Supplementary figures and images for: Unraveling the influences of sequence and position on yeast uORF activity using massively parallel reporter systems and machine learning
Source: eLife journal article supplement (doi:10.7554/elife.69611), 2023-05-25

Figure 4-figure supplement 2.

A.

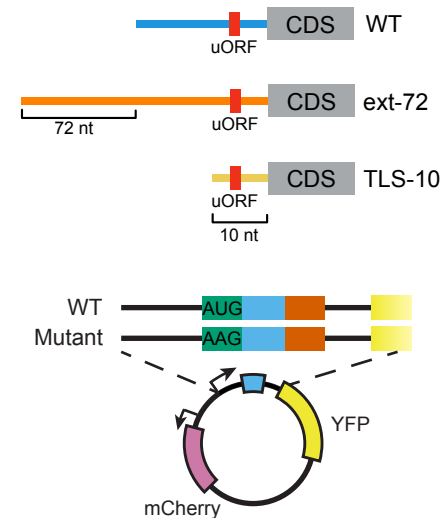

B.

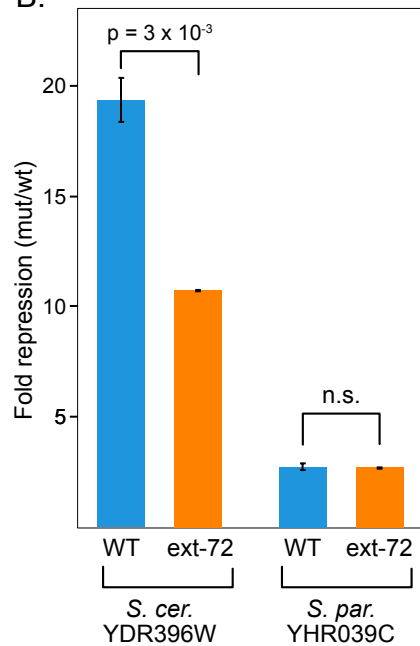

C.

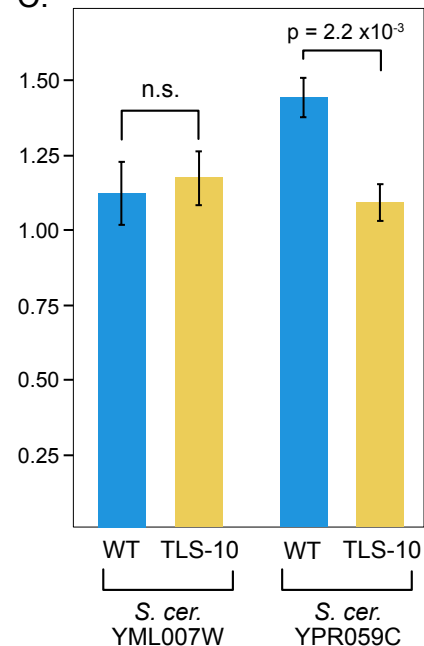

D.

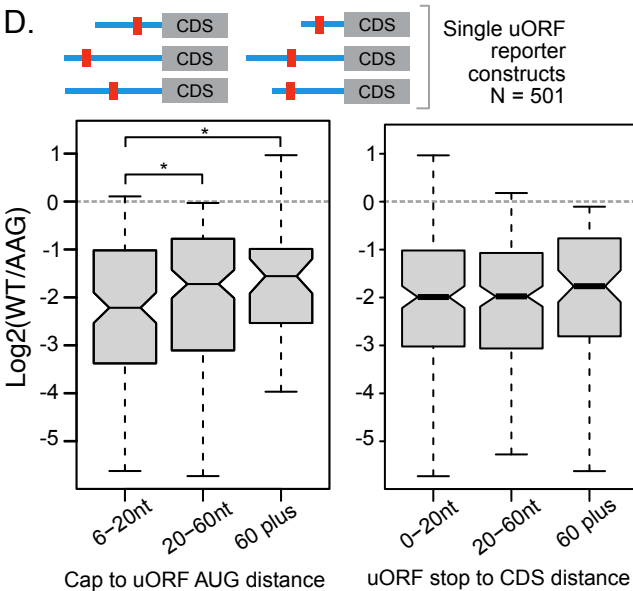

E.

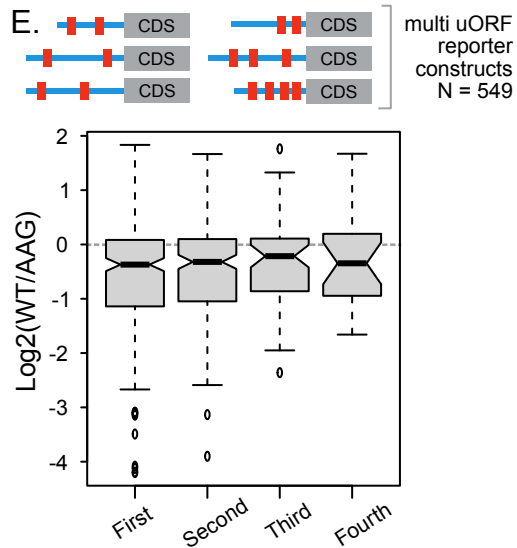

Supplement: supp [file elife-69611-supp-v1.zip]

Figure 1 - figure supplement 2.

A.

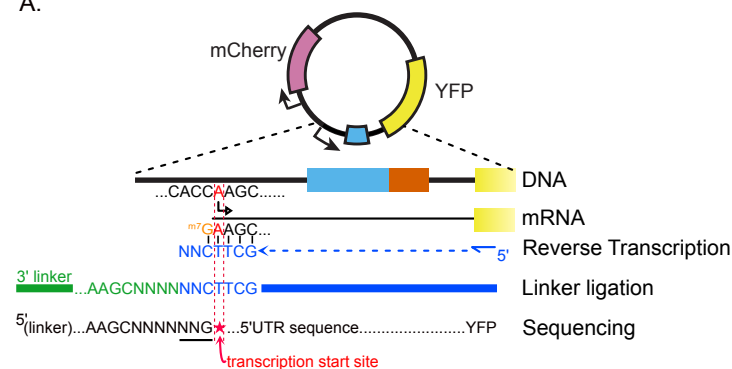

B.

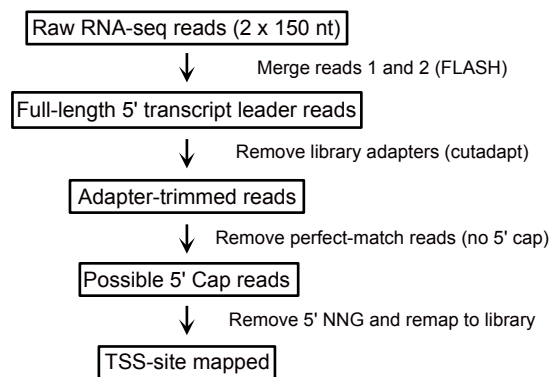

C.

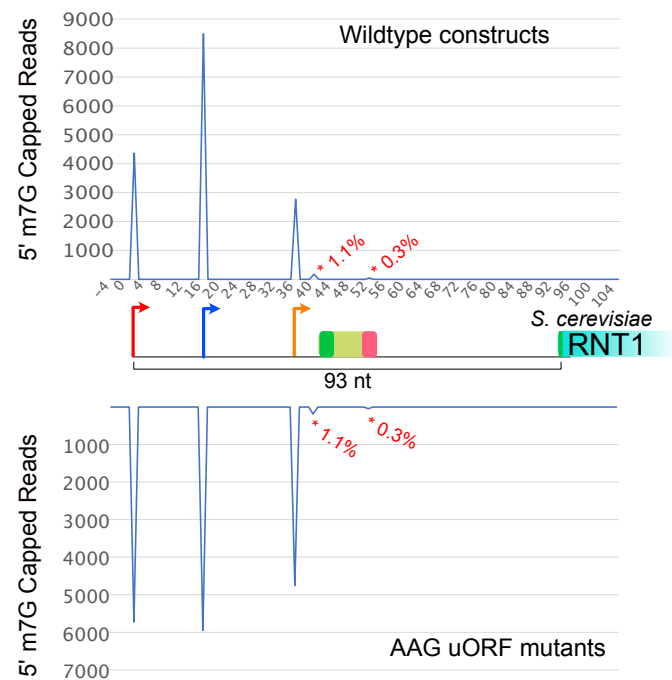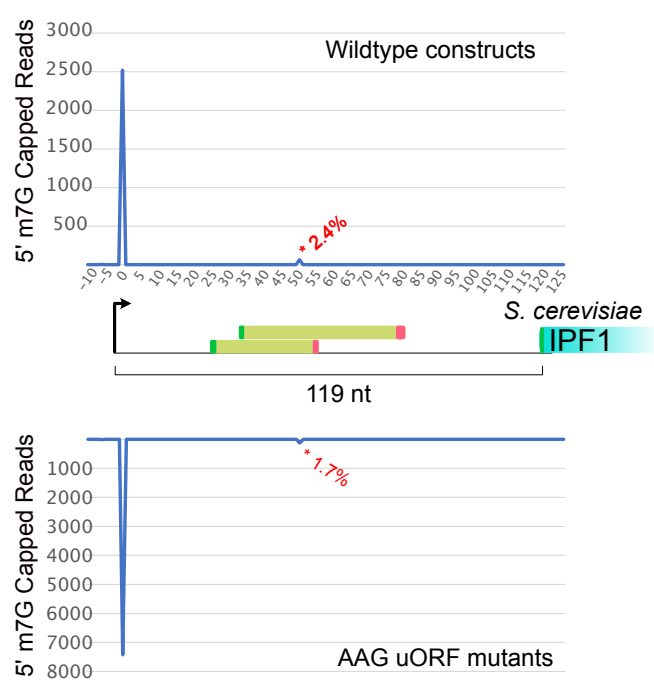

D.

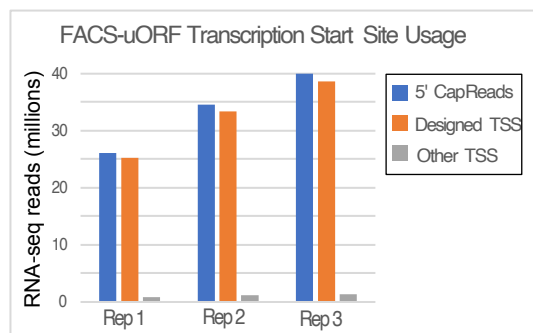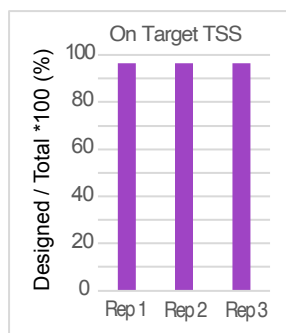

Supplement: supp [file elife-69611-supp-v1.zip]

Figure 1 - figure supplement 4.

A.

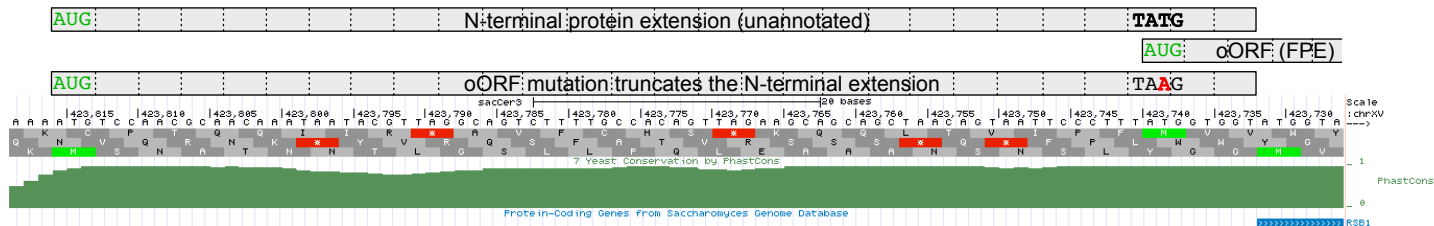

B.

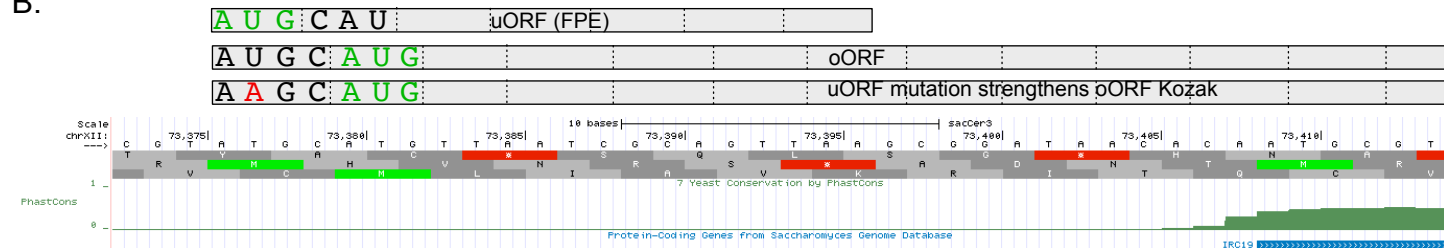

Supplement: supp [file elife-69611-supp-v1.zip]

Figure 2-figure supplement 1.

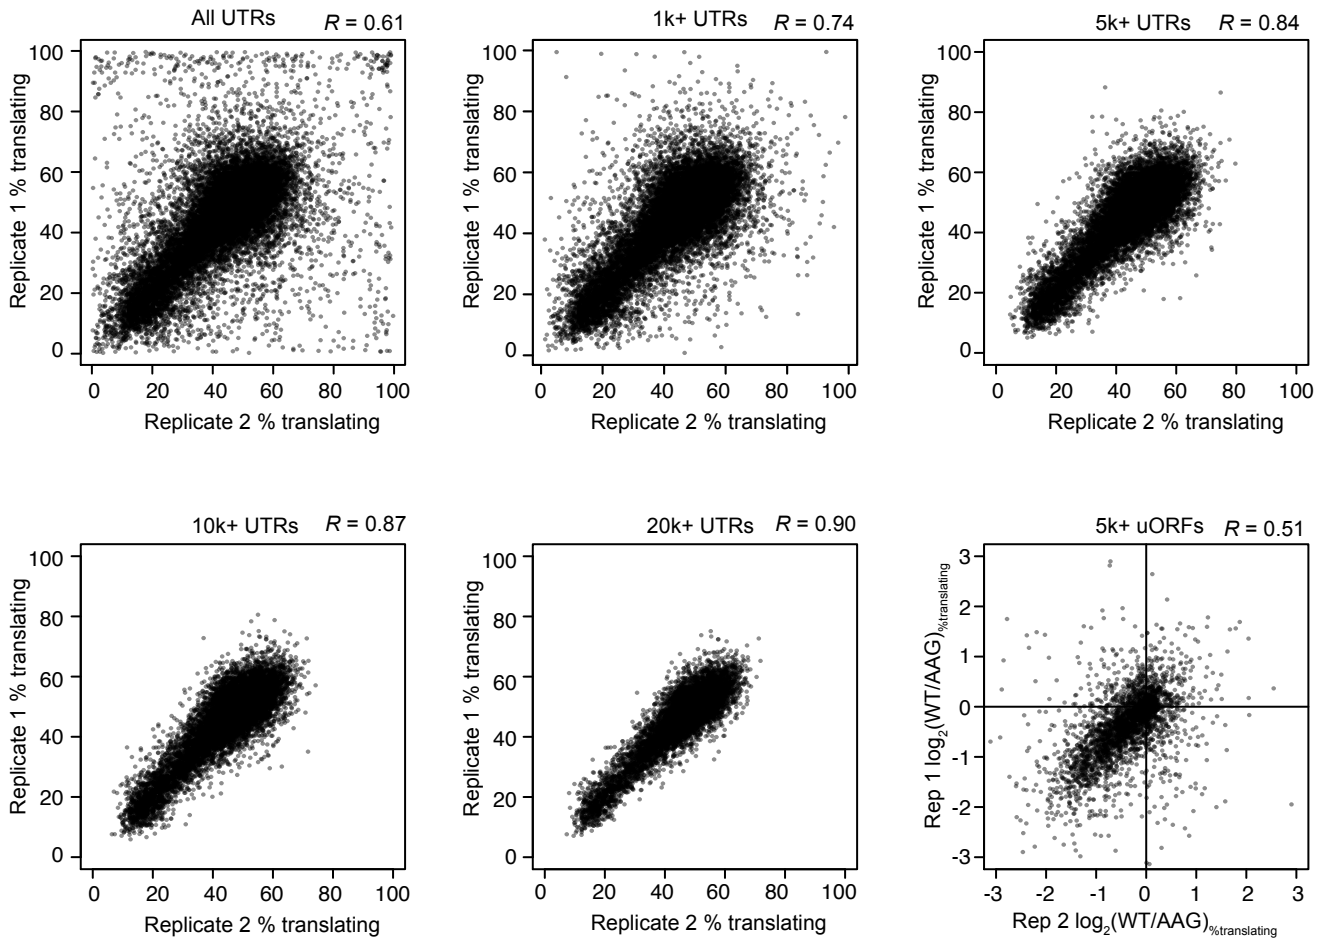

Supplement: supp [file elife-69611-supp-v1.zip]

Figure 1 - figure supplement 3

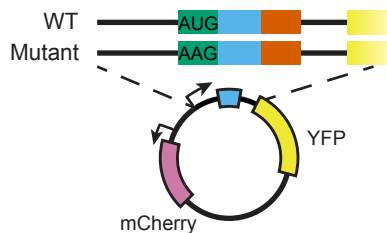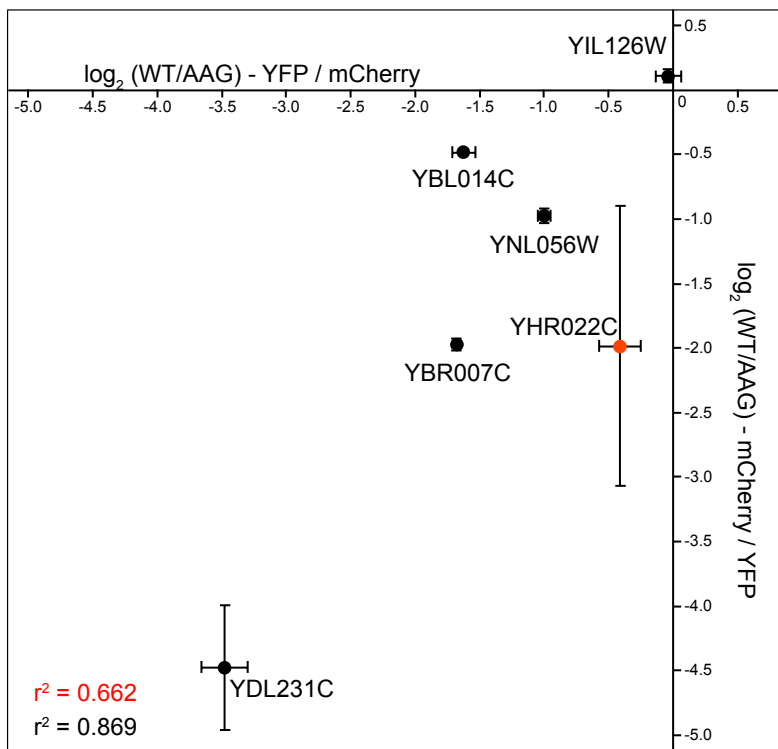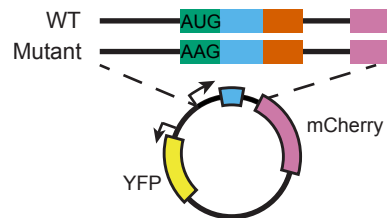

Supplement: supp [file elife-69611-supp-v1.zip]

Figure 2-figure supplement 2

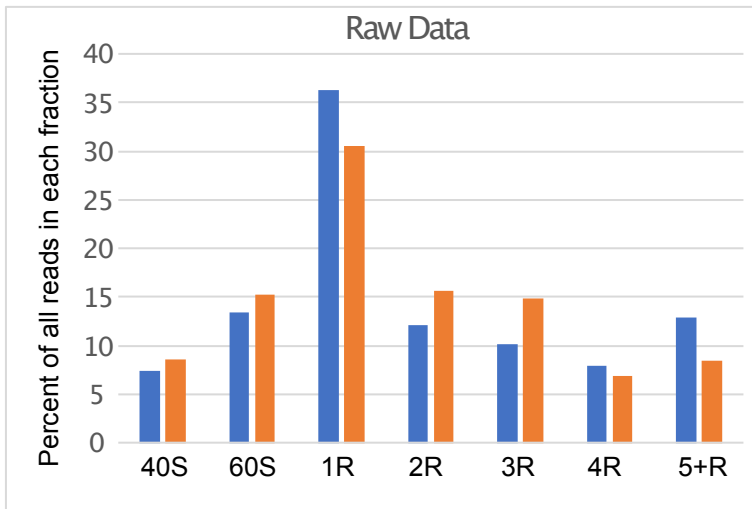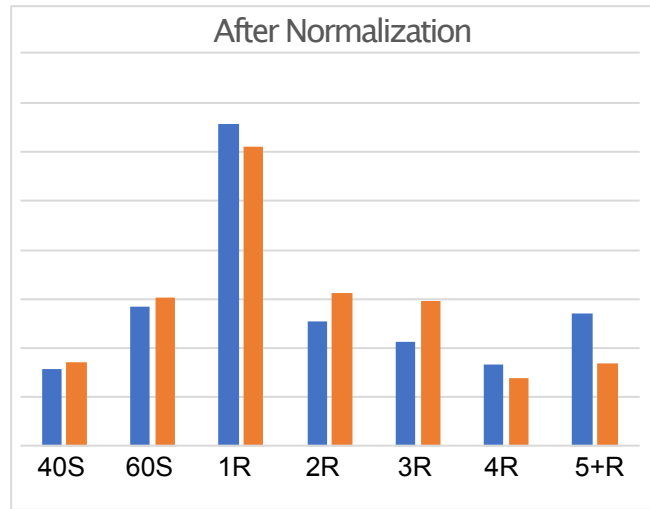

Supplement: supp [file elife-69611-supp-v1.zip]

Figure 1 - figure supplement 1.

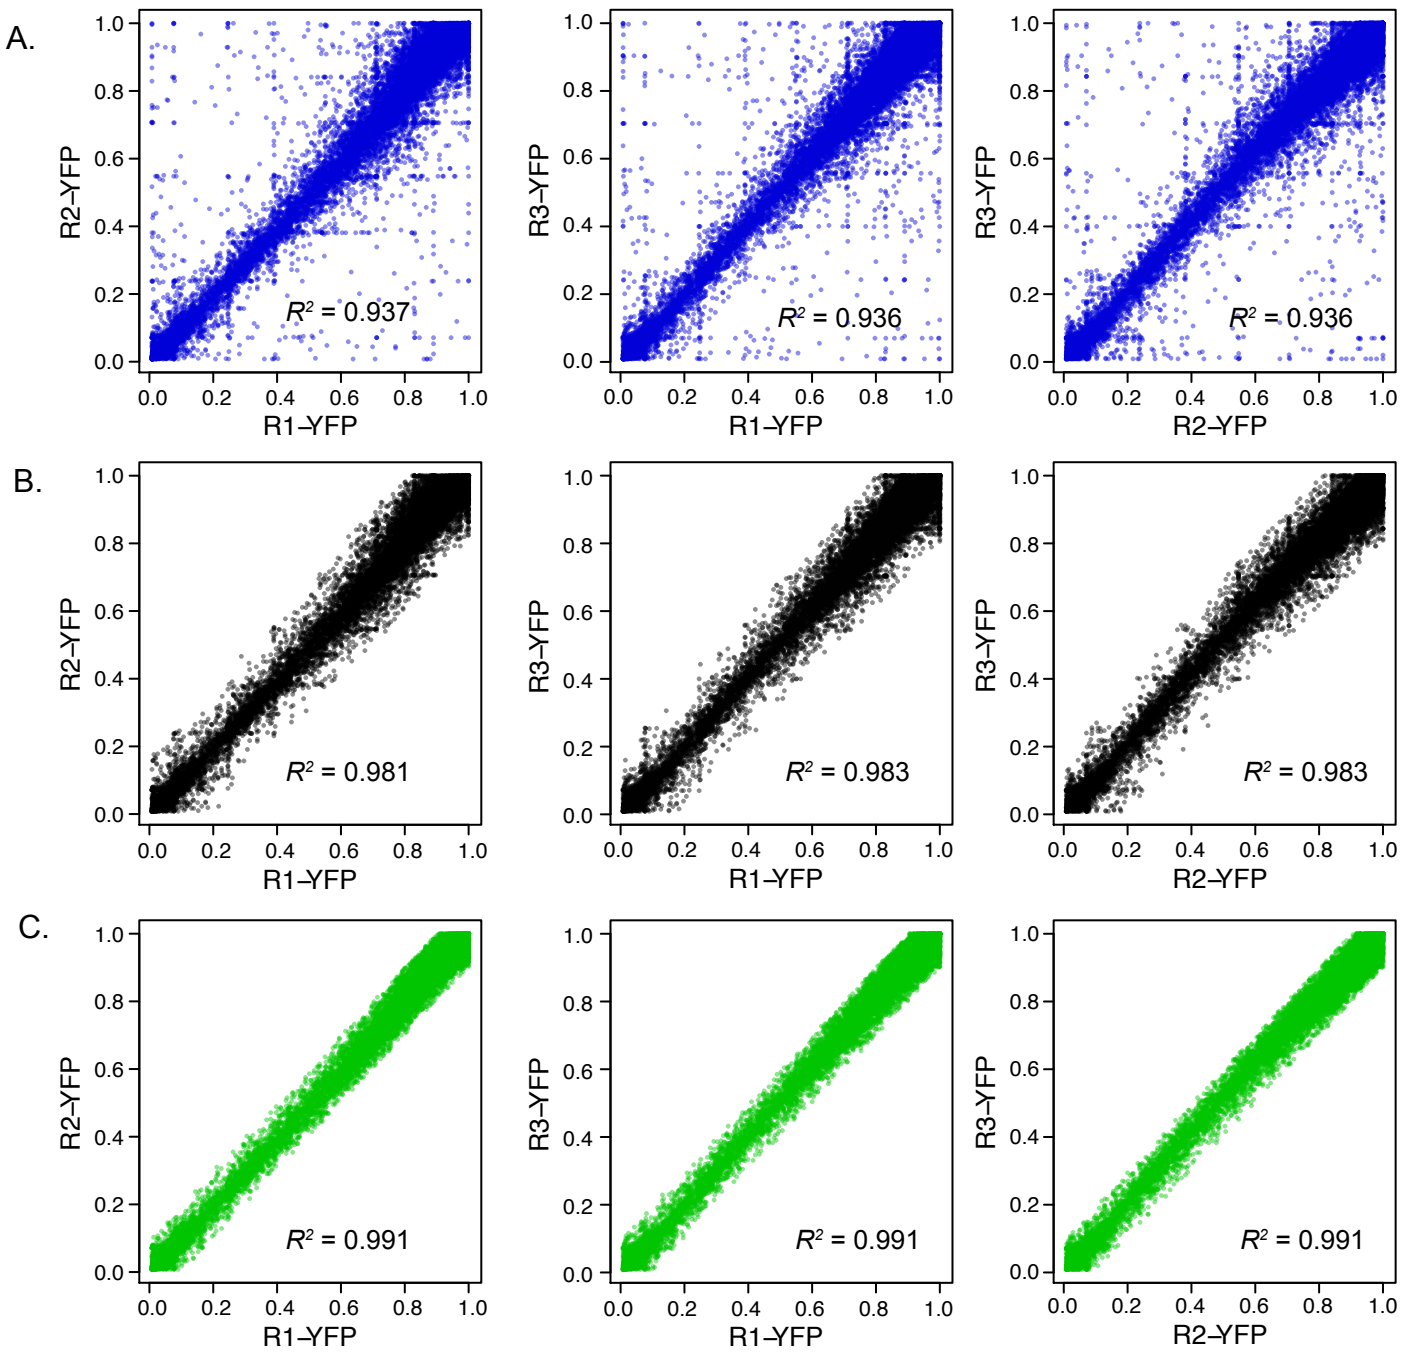

Supplement: supp [file elife-69611-supp-v1.zip]

Figure 5-figure supplement 1

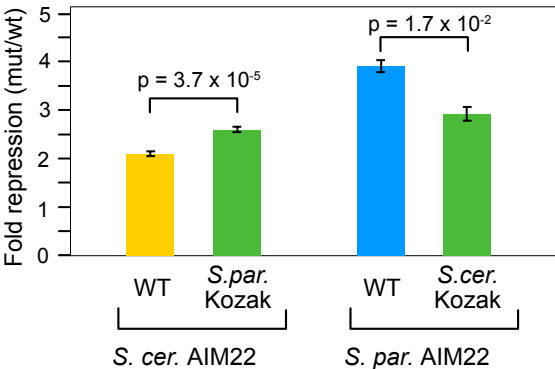

Supplement: supp [file elife-69611-supp-v1.zip]
